# Supplementary material
Source: publisher figshare collection journal article supplement (https://gsajournals.figshare.com/ndownloader/files/27678720)
Supplement: Supplementary file 1 [file 27678720]

## Sheet: p<0.05,>1.5 fold decreased
Supplemental File S5
Significantly decreased Brachypodium PM protein dataset
															NA					CA 2 days					CA 4 days					CA 6 days					CA 8 days
Bradi no.	Anova (p)	Adjusted (p)	Dunnet's (CA2)	Dunnet's (CA4)	Dunnet's (CA6)	Dunnet's (CA8)	Min Dunnet's	Max fold change (/NA)	Min fold change (/NA)	Fold change (CA2/NA)	Fold change (CA4/NA)	Fold change (CA6/NA)	Fold change (CA8/NA)	Peptide sequence	Experiment1	Experiment2	Experiment3	Experiment4	Average	Experiment1	Experiment2	Experiment3	Experiment4	Average	Experiment1	Experiment2	Experiment3	Experiment4	Average	Experiment1	Experiment2	Experiment3	Experiment4	Average	Experiment1	Experiment2	Experiment3	Experiment4	Average
Bradi1g01560.1	0.00433046	0.00761642	0.850837	0.00142202	0.29854	0.255311	0.00142202	0.929943	0.587495	0.929943	0.587495	0.84655	0.837423	MEGKLDAAIESLLNVEKQCRLAGDVAGTRKAAVDIVELCHKEGAWKTLNDQIVVLSKRRGQLKQAITAMVQKAMEYIDVTPDVDTRIELIQTLSSIAAGKIYVEIERARLIKRLAKIKEEQGKIDEAADIMQEVAVETFGSMAKTEKIAFILEQVRLCLDRQDYVRAQILSRKISPRVFDADTSKEKKKPKEGDNMVQEAPAEIPSLLELKRIYYELMIRYYSHNNDYLEICRCYKSIYDIPSIKDDPAKWIPVLRKICWYLVLAPHDPMQSSLLNATLDDKNLSEIPNFRLLLKQLVTMEVIQWTKLWEFFKDEYENEKNFLGGPLGTKAAEDLKLRIIEHNILVVSKYYSRITLKRIADLLCLSLQEAEKHLSDMVNSKSLIAKIDRPMGIVSFRTA…	9388.06	11550.8	13241.9	13125.6	11826.6	9590.98	11710	11856.8	10834.5	10998.1	6679.25	6362.59	6796.89	7953.58	6948.08	11913.1	8088.65	9852.09	10193.4	10011.8	8121.45	8416.34	12422.3	10655.4	9903.87
Bradi1g02090.2	0.00300919	0.00554488	0.687959	0.463188	0.00661242	0.73938	0.00661242	1.10419	0.622648	1.10419	0.861043	0.622648	0.903686	MSSSDNPDTVTDRAFGFGKNKDDDKKKDDKKNDEEGNSGGGGFIEKVKDFIHDIGEKIEEAVGFGKPTADVSGIHVPHIGLDGADFIVDVLIKNPNPVPIPLVDIDYLVDSDGRKLVSGLIPDAGTIRAHGQETVKIPISLVFADIKNTYRDIQPGSIIPYLVRVVLLVDVPVFGRIKIPLEKSGKVPIPYKPDVDVDKIKFHHFSFEETTATIHLSLENKNDFDLGLNLLQYEMWLGDDRVADAELTETTKIDKQGITKMQIPFTFRPKDLGSAVWDMIRGRGTGYTIKGKIDVDTPFGNMKLPISKVGGTTRLKKDSDDDDDEE	294892	376485	472866	423778	392005	342747	449189	439150	500310	432849	292920	362127	294323	400762	337533	260082	276600	218541	221102	244081	301207	345014	387163	383614	354249
Bradi1g02580.1	0.000523193	0.00119625	0.0740235	0.0300304	0.000506558	0.000333493	0.000333493	0.596639	0.147068	0.596639	0.520853	0.186271	0.147068	MADGEDIQPLVCDNGTGMVKAGFAGDDAPRAVFPSIVGRPRHTGVMVGMGQKDAYVGDEAQSKRGILTLKYPIEHGIVSNWDDMEKIWHHTFYNELRVAPEEHPVLLTEAPLNPKANREKMTQIMFETFNAPAMYVAIQAVLSLYASGRTTGIVLDSGDGVSHTVPIYEGYALPHAILRLDLAGRDLTDSLMKILTERGYSFTTTAEREIVRDIKEKLAYVALDYEQELETAKSSSTVEKSYELPDGQVITIGAERFRCPEVLFQPSLIGMEAPGIHETTYNSIMKCDVDIRKDLYGNIVLSGGTTMFPGIADRMSKEITALAPSSMKIKVVAPPERKYSVWIGGSILASLSTFQQMWISKGEYDESGPAIVHRKCF	15808.7	21626.8	10279.2	7144.57	13714.8	10717	8704.8	7971.22	5338.16	8182.8	5720.6	8751.63	7462.28	6639.12	7143.41	1825.98	3970.18	2104.73	2317.78	2554.67	1616.05	2162.42	2383.87	1905.72	2017.01
Bradi1g02810.1	0.000855493	0.0018465	0.0125117	0.0171843	0.000257581	0.0011071	0.000257581	0.573908	0.299862	0.551926	0.573908	0.299862	0.393788	MAHLAGGGGDELVPTLSSLETVYGAGEEEEEEARVRFGRLGDRFRALYSASPALFARSPGRVNLIGEHIDYEGYSVLPMAIRQDMIVAISKAAHGQVRVANVEDKYAACVYPADPDKEIDIKNHKWGHYFMCGYKGVYEYGRSKGIDMGEPVGLDVVVDGTVPLGSGLSSSAAFVCSATIAIMGILEKNFPKKEVAQFTCQSERHIGTQSGGMDQAISIMAKPGFAELIDFNPIKATDVQLPQGGTFVIAHCLAESKKAETAATNYNNRVVECRLAAIVLAIKLGMDTNKAISSVTTLSDVEGLCVSFAGKEGSSDPVVAVKKLLHEEPYTTEEIEKIVGKSLASAFESSPTSLDVLRAAKQFKLFQRAAHVYSEARRVYAFRDTVSSKLSEEDMLKKL…	21409.9	36859.8	26561.7	20202.4	26258.5	9165.89	18263.2	11462.8	19079.1	14492.7	15044.6	14617.2	12204.6	18413.4	15069.9	10676.5	11215	5488.06	4116.06	7873.91	5056.98	12858.9	9600.37	13844.8	10340.3
Bradi1g02940.1	3.8375e-06	2.11297e-05	0.0261434	8.28156e-05	6.50435e-07	1.15113e-05	6.50435e-07	0.737191	0.28903	0.737191	0.48352	0.28903	0.405409	MPALARSPSFAVLAVLALATAVAGEVFFQEKFDDGWVDRWVKSEWKKEDNTAGEWNHTSGKWNGDAEDKGIQTSEDYRFYAISAQFPELSNKDKTLVLQFSVKHEQKLDCGGGYVKLLGADIDQKKFGGETPYSIMFGPDICGYATKKVHAILTKNGKNHLIKKEVPCETDQLTHVYTLIIRPDATYSILIDNAEKQTGSIYDDWDILPAKKIRDPEAKKPEDWVDEEYIPDPEDKKPEGYDDIPKEITDPEATKPEDWDDEEDGEWTAPTMPNPEYKGPWTQKKIKNPEYKGKWKAPLIDNPDFKDDPYIYAFDSLKHIGIELWQVKSGTLFDNILITDDPEYAKKVAEETWAKHKDAEKAAFDEAEKKRLEEVCDIFSARMMTLMTMKMLMTQMRTR…	228042	282444	231963	178541	230247	136181	146446	189054	207264	169736	90477.4	102756	104158	147926	111329	50752.4	62771.4	79944	72725.7	66548.4	107419	100785	81616.7	83556.9	93344.4
Bradi1g02960.1	0.00445528	0.00780543	0.694506	0.0303633	0.00534515	0.00700771	0.00534515	0.748148	0.0521584	0.748148	0.272137	0.0521584	0.0909898	MSSKKIELDHKDMVHDSAIDYYGKRLATASSDSTVKIVNIGGASAPSQLLATLTGHYGPVWRVGWAHPKYGSILASCSYDGRVIVWKEGATGQWSQAHVFSNHKSSVNSIAWAPYELGLCLACGSSDGSISVMSMQPDGGWDTATIERAHPVGVTAVSWAPATALGSMVGSDQLVHKLVSGGFDCVVKVWEFVNGGWKVESALVSDMHAECVRDVSWAPVLGLAKSTIASASQDGKVVIWTKGKGGDKWEGKMMRDLEAPVWRVSWSLTGNILSVAAGEGAITLWKETSDGQWEQLWTKASGEPQEQATEEVIAAQ	0	20068.3	20946.2	22157.3	15792.9	7126	17559.1	8646.93	13929.8	11815.5	2664.07	6104.87	8137.53	284.881	4297.84	1813.54	770.775	314.356	396.265	823.733	1489.84	2630.97	967.378	659.792	1437
Bradi1g03490.1	0.0162241	0.0239982	0.0577929	0.0387753	0.00951754	0.0104255	0.00951754	0.495143	0.317508	0.495143	0.455391	0.317508	0.329575	MAHRVDNEYDYLFKIVLIGDSGVGKSNILSRFTRNEFCLESKSTIGVEFATRTLQIEGKTIKAQIWDTAGQERYRAITSAYYRGAVGALLVYDITKKQTFENITRWLRELRDHADSNIVIMMVGNKSDLNHLRSVQEEDGQALAEKEGLSFLETSALEALNVEKAFQTILSDIHQIISKKALAAQEAAGSGPPIQGTTINVADSSGNTKKGCCST	4160.76	11538.6	17570.7	22180.8	13862.7	6505.38	6144.89	7309.7	7496.16	6864.03	6872.29	8748.36	5188.81	4442.43	6312.97	5134.92	3768.36	3762.79	4940.06	4401.53	3823.62	7654.01	3670.1	3127.52	4568.81
Bradi1g03650.1	3.97054e-05	0.000134242	0.0316915	0.00170262	3.65173e-05	2.63067e-05	2.63067e-05	0.714716	0.343168	0.714716	0.573986	0.401785	0.343168	MGNCLGSRITHGSTHPAASGFFSRGTGKDGSRLSACSSRASSSSMPPSAKTEWEILQSANVKIFSYNDLRLATRSFRPTNVLGEGGFGPVYKGWIDENTLSACKPGSGIPVAVKRLNQEGLQGHREWLAEVNFLGQFCHPNLVKLIGYCLEDENRLLVYEYMPRGSLENHLFRRGSHIQPLPWNLRMKVALGAAKGLAYLHSAEAKVIYRDFKTSNVLLDTDYTAKLSDFGLAKDGPVGEKSHVSTRVMGTYGYAAPEYLSTGHLTAKSDIYSFGVVLLEMLSGRRAIDKNRPQGQHNLVEWARPYLTHSRKVFRVLDTKLEGQYSHRGAQTIAALAVECLSYDAKMRPSMDAVVSILEGIQGSSEADRKPATEKHQEPKGAAKNDPGAGACKHRRNNL…	20989	17519.2	19167.5	11774.7	17362.6	12342.6	11153	15086.5	11055.3	12409.3	10855.7	9702.39	8896.71	10408.8	9965.9	8480.61	10008	5316.53	4099	6976.04	6085.95	6725.21	5510.48	5511.54	5958.29
Bradi1g03700.1	2.02404e-05	7.58454e-05	0.0195218	0.00025931	1.57255e-05	3.52021e-05	1.57255e-05	0.684461	0.300685	0.684461	0.472857	0.300685	0.354213	MAPATPKTGLFVGINKGHVVTKRELPPRPSDRKGKITKRVHFVRNLIREVAGFAPYEKRITELLKVGKDKRALKVAKRKLGTHKRAKKKREEMSNVLRKMRSAGVADKKK	47528.7	58653.4	58857.6	43920.3	52240	26570.9	35694.3	43412.1	37347.7	35756.2	31297.2	29860.1	14184.6	23466.4	24702.1	21620.9	25918.8	7848.21	7443.12	15707.8	20126.4	14842.9	18642.7	20404.4	18504.1
Bradi1g03820.1	0.00132873	0.00270356	0.870701	0.624419	0.11466	0.00489748	0.00489748	1.09967	0.658757	0.935309	1.09967	0.800511	0.658757	MAAPPARARADYDYLIKLLLIGDSGVGKSCLLLRFSDGSFTTSFITTIGIDFKIRTVELDGKRIKLQIWDTAGQERFRTITTAYYRGAMGILLVYDVTDESSFNNIRNWIRNIEQHASDNVNKVLVGNKADMDESKRAVPTSKGQALADEYGITFFETSAKTNLNVEQVFFSIARDIKQRLSESDSKPEGGTIKIKPEGEADAAGAQKSACCGS	11003.1	9091.76	9733.97	7318.59	9286.86	8442.14	6763.85	10491	9047.29	8686.08	10553.3	10098.6	10098.1	10099.8	10212.4	7009.8	7634.58	7106.67	7985.86	7434.23	8016.3	5368.51	5508.13	5578.19	6117.78
Bradi1g03840.1	0.00386551	0.00687939	0.139128	0.00347369	0.0356669	0.00185351	0.00185351	0.701776	0.395489	0.701776	0.442655	0.600694	0.395489	MAVSELEVDGVVFPPLERPPGSAHAHFLAGAGVRGMDIGGNFIKFTAIGVYLQADAAVSSLAAKWAAKPAADLAADAAFFRDVVTGEFEKFTRVTMILPLTGAQYAEKVTENCVKYWQATGAYTDAEAAAVEKFREAFQPHSFAPGGSILFTHSPAGVLTVAFSKDSSVPASGAAAIENRPLCEAVLESIIGEHGVSPAAKLSLATRVAELLKAAEPVSVSL	39553.3	88005.6	92360.6	58533.3	69613.2	40270	34550	61459.5	59131.8	48852.8	27064.7	35088.5	26382.7	34722.5	30814.6	47005	31651.9	46634.4	41973.6	41816.2	20699.3	27617.4	26804.7	35003.6	27531.2
Bradi1g04070.1	3.40275e-06	1.9339e-05	0.0962891	0.000503223	9.99405e-07	8.44773e-06	9.99405e-07	0.779954	0.244398	0.779954	0.5406	0.244398	0.344537	MTFKRRNGGRNKHGRGHVKYIRCSNCAKCCPKDKAIKRFLVRNIVEQAAVRDVQEACVHDGYILPKLYAKVHHCVSCAIHAHIVRVRSRENRRNREPPQRFRRREDGPRPGQGGPPRAGGPGGPGGAPPVPGAGAPAPRV	116824	161275	189666	137621	151346	113556	140003	101742	116872	118043	85431.2	97147.6	49227.1	95465.1	81817.8	46345.6	48353.1	32683.4	20572.9	36988.7	62985.7	45598.7	51577.4	48415.8	52144.4
Bradi1g04140.1	5.12024e-06	2.58632e-05	0.000435186	1.82396e-06	4.62056e-06	1.29265e-05	1.82396e-06	0.660881	0.481109	0.660881	0.481109	0.521026	0.507478	MKVIEKIQEAAANGRTVFSFEYFPPRTEEGVENLFERMDRMVAHGPNFCDITWGAGGSTADVTLDIANRMQNMVCVETMMHLTCTNMPVEKIDSALDTIKSNGIQNVLALRGDPPHGQDKFVQVAGGFSCALDLVQHIKAKYGDYFGITVAGYPEAHPEVILGEEGATEEAYSNDLAYLKRKVDAGADLIVTQLFYDTDMFLKFVNDCRQIGITCPIVPGIMPINNYKGFIRMTGFCKTKIPAEITAALDPIKDNEEAVKAYGIHLGTEMCKKILASGINTLHLYTLNMEKTALAILMNLGLIEESKLSRTLPWRPPTNVFRVKEDVRPIFWANRPKSYISRTLGWDQYPHGRWGDSRNPSYGALTDYQFTRPRGSGKKLQEEWAVPLKSVQDINERFM…	320363	442462	444648	371326	394700	257138	241384	245759	299118	260849	196040	179896	163394	220246	189894	253524	219409	187366	162296	205649	197299	171951	213780	218176	200302
Bradi1g04660.1	3.35265e-06	1.91641e-05	0.0183232	0.000619826	2.32749e-07	1.19849e-05	2.32749e-07	0.727297	0.3004	0.727297	0.586773	0.3004	0.36959	MADRGGERGGDRGGERGGFGRGFGRGGRGDRGGRRGGRRGPRQEEEKWVPVTKLGRLVKEGKFQKIEQIYLHSLPVKEHQIVETLCPGLKDEVMKITPVQKQTRAGQRTRFKAFVVVGDSNGHVGLGVKCAKEVATAIRGAIILAKLSIVPVRRGYWGNKIGQPHTVPCKVTGKCGSVTVRMVPAPRGSGIVAARVPKKVLQFAGIEDVFTSSRGSTKTLGNFVKATFDCLMKTYGFLTPDFWRETTFTKAPYQEYTDLLAKPTKALMLDAPVEKIEA	61462.7	94621.6	98817.7	89484.5	86096.6	47593	63781.4	70934.3	68162.3	62617.8	52325.1	52743	37848.5	59159.9	50519.1	23651.8	30811.8	22875.2	26115.1	25863.5	27424.2	40699.3	30863.4	28295	31820.5
Bradi1g04860.1	4.62434e-07	4.1041e-06	0.0255224	0.0214173	3.95305e-08	1.02133e-05	3.95305e-08	0.788502	0.316548	0.788502	0.782405	0.316548	0.49447	MRSSWADSVANAEESAPATAAASAAVANHQNSRPTRSSYVPPHLRGRSPGPPSENHAPGLAPAPAGIPPSGAVQPSGYAAVVGGGSRWAAPPAGGGTGVGVVRQGGGRGGGGGGGGGGWNSRPGLDRRDREPNPFGDVEPPAEVDFESQANTGINFDAYEDIPVETSGHDVPTPVNTFAEIDLGDALNENIRRCKYVRPTPVQRHAIPIVIGGRDLMACAQTGSGKTAAFCFPIISGIMKSRPPQRPRGSRTAYPLALILSPTRELSVQIHEEAKKFAYQTGVRAVVAYGGAPIHQQLRELERGVEILVATPGRLMDLLERARVSLQMVNYLALDEADRMLDMGFEPQIRKIVEQMDMPPRGVRQTMLFSATFPKEIQRLASDFLADYIFLAVGRVGSS…	26560	28131.8	25997.2	20732.1	25355.3	19541.3	18735.1	19695.4	21998.9	19992.7	21615.1	15773.7	18783.8	23179.8	19838.1	8837.35	7903.29	9696.37	5667.58	8026.15	12663.3	9482.72	13799.4	14204.3	12537.4
Bradi1g04950.2	1.9283e-08	3.85871e-07	0.0215594	7.52756e-07	2.80045e-10	1.16303e-07	2.80045e-10	0.807933	0.287257	0.807933	0.510828	0.287257	0.370769	MSSEAAKVVVPESVLRKRKREELWAAEKKTKAVEEKKKSSENRKVIFARAKQYAEEYDAQDKELVQLKREARLKGGFYVSPEAKLLFVVRIRGINAMHPKTRKILQLLRLRQIFNGVFLKVNKATINMLRRVEPYVAYGYPNLKSVRELIYKRGYGKLNKQRIPLTNNKVIEEGLGKHNIICIEDLVHEILTVGPHFKEANNFLWPFKLKAPLGGLKKKRNHYVEGGDAGNRENYINQLVRRMN	243151	343515	333046	288039	301938	221657	249517	238139	266470	243946	155959	164508	134433	162053	154238	112249	96892.4	77456.9	60336.4	86733.8	111590	93934.6	126821	115451	111949
Bradi1g05670.1	8.2077e-05	0.000243881	0.10634	0.393866	0.00782985	0.00092622	0.00092622	1.14952	0.532739	0.770408	1.14952	0.638219	0.532739	MSLIAGEEFQHILRLLNTNVDGKQKIMFALTSIKGVGRRFSNIVCKKADIDMNKRAGELTPEELDRLMHVVANPRQFKVPDWFLNRKKDYKDGRFSQVVSNALDMKLRDDLERLKKIRNHRGLRHYWGVRVRGQHTKTTGRRGKTVGVSKKR	288647	371474	420704	351970	358199	197817	259161	304252	342608	275960	411634	505874	368288	361234	411757	247726	242521	208090	216101	228610	155846	180256	224758	202447	190827
Bradi1g06220.2	9.53779e-07	7.52425e-06	0.00036978	1.16914e-05	4.07195e-06	2.37463e-07	2.37463e-07	0.665404	0.407887	0.665404	0.511547	0.463324	0.407887	MAPKVAVAKKGDAKAQAAKVAKAVKSGSIKKKTKKIRTSVTFHRPRTLKKARDPKYPRISTPGRNKLDQYQILKYPLTTESAMKKIEDNNTLVFIVDLKADKKKIKAAVKKMYDIQAKKVNTLIRPDGKKKAYVKLTADYDALDVANKIGII	110685	106832	100944	79265.6	99431.5	52394.4	64950	76186.7	71117.5	66162.1	51653.3	55311	45038.1	51453.1	50863.9	55031.4	46981.4	37852.7	44410.5	46069	39403.7	32817.2	47661.7	42344.8	40556.8
Bradi1g06340.1	0.000114766	0.000321662	0.0225802	0.00099216	1.78727e-05	0.00160019	1.78727e-05	0.801383	0.571217	0.801383	0.70202	0.571217	0.719703	MFGRGPPKKSDNTRYYEILGVPKEASQDDLKKAYRKSAIKNHPDKGGDPEKFKEIAQAYEVLSDPEKREIYDQYGEDALKEGMGGGGGMHDPFDIFQSFFGGSPFGGGGSSRGRRQRRGEDVVHPLKVSLEELYNGTSKKLSLSRNVLCSKCNGKGSKSGASMKCAGCQGAGYKMQIRQLGPGMIQQMQQPCNDCRGTGETISDKDRCPQCKGEKVSQEKKVLEVVVEKGMQHGQKITFPGEADEAPDTLTGDIIFVLQQKEHPKFKRKSDDLFYEHTLTLTEALCGFQYVLTHLDGRQLLIKSNPGEVVKPDSFKAINDEGMPMYQRPFMKGKLYIHFTVDFPDSLNPDQCKALEAVLPPKPASQYTDMELDECEETMAYDIDIEEEMRRRQQQQQQE…	19659.4	18535.3	19649.9	15262	18276.7	16027.9	12551.7	15473.1	14533.8	14646.6	12496	13110.6	10728	14987.7	12830.6	12418.2	10381.3	8661.98	10298.3	10439.9	14702	12157.7	12492	13263.3	13153.8
Bradi1g06366.1	6.56297e-05	0.000204022	0.0328907	0.000357774	5.82317e-05	5.75241e-05	5.75241e-05	0.724482	0.427152	0.724482	0.511779	0.428645	0.427152	MPFKRFVEIGRVALVNYGKDYGRLVVIVDVVDQNRALIDAPDMVRCQINFKRLSLTDIKIDIKRVPKKATLIKAMEEADVKNKWENSSWGKKLIVQKRRASLNDFDRFKVMLAKIKRGGAIRQELAKLKKEVAA	66143.2	87517.9	63401.5	44178.9	65310.4	45571.2	42861.3	53847.4	46984.9	47316.2	33179.8	34379.5	30150.3	35988.3	33424.5	27719.9	33738.9	24613.9	25907	27994.9	28494.2	22692.6	28785.3	31617.6	27897.5
Bradi1g06630.1	0.00563082	0.00951876	0.926032	0.0501781	0.052497	0.0458191	0.0458191	1.15916	0.282104	1.15916	0.294433	0.300145	0.282104	MINFVLLISRQGKVRLTKWYSPYTQKERTKVIRELSGLILTRGPKLCNFVEWRGYKVVYRRYASLYFCMCIDADDNELEVLEIIHHFVEILDRYFGSVCELDLIFNFHKCPWPNFQAYYVLDEILIAGELQESSKKNVARLIAAQDSLVEAAKEEASSISNIIAQATK	277.243	23739.4	28693.7	21212.2	18480.6	20478.3	15639.4	26102.7	23467.5	21422	8473.77	5334.44	7766.61	190.429	5441.31	5346.95	16.6386	13236.8	3587.15	5546.87	6980.56	5062.49	7214	1596.82	5213.47
Bradi1g06700.1	0.000703929	0.00155672	0.183553	0.0205814	0.000528186	0.00107252	0.000528186	0.737321	0.314386	0.737321	0.58417	0.314386	0.392995	MSEHSENVTEKIMGSIMDTIADNLPKQKSGRFDPAAVSDKVNKLFGRQQSLHGVLGGGKSADVLLWRNKKISSSVLALATAIWIFFEWLDYHFLTIISFALVLGMVVQFVWSNFASRSSNVPRVELPKELFVNIAVAVGAQVNKFLGFLQDVSCERNLKHFVLAIVGLWAAAVAGSWFNFLTVIYIGFVCAHTLPVLYEKYEDQVDSFLYSLLDLLRDQYKKLDSGVLSRIPKGNMKFKKSE	30141	64931.1	51769.6	40869.5	46927.8	26287.8	41783.9	26922.7	43409	34600.9	19513	33170.6	30742.4	26229.2	27413.8	12816.1	12388	20497.5	13312.1	14753.4	14381.9	17643.2	17226.8	24517.7	18442.4
Bradi1g06800.1	0.000138489	0.000377417	0.0196861	0.11695	0.00786108	0.997198	0.00786108	1.21761	0.650289	0.692026	1.21761	0.650289	0.976332	MREILHIQGGQCGNQIGAKFWEVICDEHGIDATGRYAGDSDLQLERINVYYNEASGGRFVPRAVLMDLEPGTMDSVRSGPFGQIFRPDNFVFGQSGAGNNWAKGHYTEGAELIDSVLDVVRKEAENCDCLQGFQVCHSLGGGTGSGMGTLLISKIREEYPDRMMLTFSVFPSPKVSDTVVEPYNATLSVHQLVENADECMVLDNEALYDICFRTLKLATPSFGDLNHLISATMSGVTCCLRFPGQLNSDLRKLAVNLIPFPRLHFFMVGFAPLTSRGSQMYRALTVPELTQQMWDAKNMMCAADPRHGRYLTASACFRGKMSTKEVDEQMLNVQNKNSSYFVEWIPNNVKSSVCDMPPRGLKMAGTFVGNSTSIQEMFRRVSEQFTAMFRRKAFLHWYT…	158342	150161	207016	205313	180208	92043.5	140139	140197	126454	124709	178804	250504	230196	218190	219424	105901	104852	131826	126170	117187	158969	181386	204085	159332	175943
Bradi1g06860.1	2.47031e-08	4.44326e-07	0.000564645	8.75559e-07	1.35979e-09	1.33553e-11	1.33553e-11	0.746514	0.425292	0.746514	0.552587	0.451786	0.425292	MGKEKTHINIVVIGHVDSGKSTTTGHLIYKLGGIDKRVIERFEKEAAEMNKRSFKYAWVLDKLKAERERGITIDIALWKFETTKYYCTVIDAPGHRDFIKNMITGTSQADCAVLIIDSTTGGFEAGISKDGQTREHALLAFTLGVKQMICCCNKMDATTPKYSKARYDEIVKEVSSYLKKVGYNPDKVPFVPISGFEGDNMIERSTNLDWYKGPTLLEALDQINEPKRPSDKPLRLPLQDVYKIGGIGTVPVGRVETGVIKPGMIVTFGPTGLTTEVKSVEMHHEALQEALPGDNVGFNVKNVAVKDLKRGFVASNSKDDPAKEAANFTSQVIIMNHPGQIGNGYAPVLDCHTSHIAVKFAELVTKIDRRSGKELEKEPKFLKNGDAGIVKMIPTKPMV…	4.98483e+06	6.19381e+06	6.52903e+06	5.16285e+06	5.71763e+06	3.84376e+06	4.25324e+06	4.38861e+06	4.58757e+06	4.2683e+06	3.25909e+06	3.23112e+06	2.83596e+06	3.31178e+06	3.15949e+06	2.64346e+06	2.69206e+06	2.51637e+06	2.48068e+06	2.58314e+06	2.28059e+06	2.16454e+06	2.62627e+06	2.65525e+06	2.43166e+06
Bradi1g07210.1	0.0249886	0.034788	0.0442237	0.415489	0.57012	0.010483	0.010483	0.731575	0.226827	0.386646	0.676095	0.731575	0.226827	MGHSNVWNSHPKNYGPGSRVCRVCGNSHGLIRKYGLMCCRQCFRSNAKDIGFIKYR	7156.04	3309.47	7474.93	6027.11	5991.88	1909.12	1655.19	3246.9	2455.73	2316.74	4994.29	3328.44	1734.32	6147.29	4051.08	399.596	7560.59	3787.45	5786.43	4383.52	1798.26	1399.6	1272.54	966.085	1359.12
Bradi1g08030.1	0.000373832	0.000890989	0.0704603	0.184321	0.045453	0.476183	0.045453	1.63339	0.30922	1.63339	1.49873	0.30922	0.659292	MVRRRAAWAALLVALAACAALPATTTANKISINWAPNTNYTVWEQTHGPFYKGDWLVFYYTTGQADVVEVNESGYNRCDASNAIYNYSKGRSFAFELNQTKTYYFICSFGYCPGGMRLAIKSQKLPPPSPPPSAHDRSAALARSHAGLVLYAAAAVLAALLRML	6927.31	15665.3	18603	28336	17382.9	37109.4	30948.7	19355.3	26158.7	28393	23978.5	20156	34323.7	25751	26052.3	7432.02	2539.79	5957.3	5571.45	5375.14	14263.2	9584.01	7368.38	14626.1	11460.4
Bradi1g08120.1	0.00467445	0.00812913	0.115392	0.00529067	0.998732	0.128655	0.00529067	1.01858	0.642059	0.789546	0.642059	1.01858	0.795303	MVKICCIGAGYVGGPTMAVIAIKCPAIEVVVVDISKPRIDAWNSDVLPIYEPGLDDVVKACRGKNLFFSTDVEKHVAEADIIFVSVNTPTKTRGLGAGKAADLTYWESAARMIADVSKSDKIVVEKSTVPVKTAEAIEKILTHNSKGINYQILSNPEFLAEGTAIDDLFKPDRVLIGGRETPEGRKAVQALKEVYAHWVPEENIITTNLWSAELSKLAANAFLAQRISSVNAMSALCEATGANVSEVSYAIGKDSRIGPKFLNASVGFGGSCFQKDILNLVYICECNGLPEVANYWKQVIKINDYQKSRFVNRVVSSMFNTVSGKKIAVLGFAFKKDTGDTRETPAIDVCKGLLGDKAQVSIYDPQVTEDQIQRDLAMNKFDWDHPMHLQPTSPTAVKQ…	177835	166741	179001	165074	172163	128746	113431	159259	142286	135930	99707.5	114198	107143	121106	110539	212429	211842	153747	123427	175362	146671	127918	135828	137269	136921
Bradi1g08260.1	5.45335e-06	2.70462e-05	0.0462089	0.000157845	1.55503e-06	4.00153e-06	1.55503e-06	0.759078	0.346147	0.759078	0.515384	0.346147	0.35685	MVSGSGVCARRVVVDARHHMLGRLASIVAKELLNGQRVVVVRCEEICMSGGLVRQKMKYLRFLRKRMNTKPSHGPIHFRAPAKILWRTIRGMIPHKTKRGEAALARLKAYEGVPPPYDRTKRMVIPDALKVLRLQAGHKYCLLGQLSKEVGWNYADTIRELEEKRKEKAKVAYDRRKQLAKLRVKAEKTAEEKLGTQLEILAPIKY	75086.8	101280	126808	117201	105094	64701.8	100200	75715.6	78481	79774.6	56565.8	62557	43876.7	53655.5	54163.8	41773.8	31132.7	33272.3	39333.2	36378	35982.3	40803.7	32160.6	41064.6	37502.8
Bradi1g08480.1	4.08616e-06	2.20489e-05	0.893468	2.01646e-05	0.000179144	0.000133535	2.01646e-05	0.948109	0.448264	0.948109	0.448264	0.578923	0.571028	MASAGVVAAAVVVAAFAAFCATDPLRLGSMVDFPGFEAHVVELPDAAEMPPHADAGERLRGAEIRFRGEVQGPESVAFDPQGRGPYTGVADGRVLFWDGARWVYFAHASPNWTAELCGPKASPLDFLRDEHICGRALGIRFDKRTGNLYIADAYFGLFKVGPEGGLATPLATEAEGVRFNFTNDLDLDAEGNVYFTDSSIYYQRRNFMQLVFSGDPSGRLLKYNPQTKETTVLHRNLQFPNGVSLSKDGSFFVFCEGSRGRLSRYWLKGEKAGTVDLFAILPGFPDNVRTNEKGEFWVAIHCRRSAYARLTSRRVQLRKFLLSLPIPAKYHYLMQIGGNLHALIIKYSPDGEVLDILEDTKGQVVRAVSEVEEKDGKLWIGSVLMPFIAVFDYAKES	139678	147163	142996	134174	141003	114318	109575	157452	153399	133686	71612.2	65194	53830.1	62190	63206.6	86520	67579.1	89579.8	82840	81629.7	106361	72181.9	69252.8	74270.4	80516.6
Bradi1g08860.1	7.97745e-05	0.000239546	0.97943	0.919706	7.38077e-05	0.126617	7.38077e-05	1.03939	0.446175	1.03939	0.941001	0.446175	0.792106	MAPKAEKKPAAKKPAEEEPAVEKAEKAPAGKKPKAEKRLPAGKTAAKEGGVDKKAKKKSKKSVETYKIYIFKVLKQVHPDIGISSKAMSIMNSFINDIFEKLAGESAKLARYNKKPTITSREIQTSVRLVLPGELAKHAVSEGTKAVTKFTSS	18566.5	14575.9	19090.7	15822	17013.8	14868.2	20369.9	18176.5	17321.3	17684	18977.1	16548.3	14814.3	13700.3	16010	8694.11	6882.62	7834.45	6953.36	7591.13	17256.1	14349.8	12263	10037.9	13476.7
Bradi1g09460.1	3.71867e-05	0.000128731	0.879956	0.0474299	0.00231861	0.0745083	0.00231861	1.55295	0.642544	0.906434	0.642544	1.55295	1.32669	MFGRDPWGGTLEISNADSATDDDRSRDLDRGALMRHQLDETQQSWLLAGPGDQAGKKKKKYVDIGCMVIDRKIFLWTVGTILGVGLFIGFVMMIVKLVPHKKPPPPPPDQYTQALHKALMFFNAQRSGPLPKHNGVSWRGNSGMKDGLSDSTARKSLVGGFYDAGDAIKFNFPMAWSMTMLSWTVIEYKAKYEAIGELDHVKEVIKWGTDYILKTFNSSADTIDRIVAQVGVGDTSKGPMPNDHYCWMRPEDIDYKRPVIECHSCSDLAAEMAAALASASIVFKDNKKYSDKLVHGAKALYKFGRLQRGRYSPNGSDQSLFYNSTSYWDEFVWGGAWMYFATGNTSYLTIATAPGMAKHAGAFWLGSPNYGVFTWDDKLPGSQVLLSRLRLFLSPGYPY…	79462.3	55605.9	88109.3	104849	82006.6	61082.5	89852.4	68713.6	77685.5	74333.5	48611.7	45610.7	52050.6	64498.3	52692.8	135190	103058	134459	136700	127352	111022	106630	127122	90414.8	108797
Bradi1g10150.1	0.00230213	0.00438022	0.263603	0.370402	0.000400759	0.169077	0.000400759	0.778844	0.274041	0.746404	0.778844	0.274041	0.707705	MRECISIHIGQAGIQVGNACWELYCLEHGIQADGQMPGDKTVGGGDDAFNTFFSETGAGKHVPRAVFVDLEPTVIDEVRTGTYRQLFHPEQLISGKEDAANNFARGHYTIGKEIVDLCLDRIRKLADNCTGLQGFLVFNAVGGGTGSGLGSLLLERLSVDYGKKSKLGFTVYPSPQVSTSVVEPYNSVLSTHSLLEHTDVAVLLDNEAIYDICRRSLDIERPTYTNLNRLVSQVISSLTASLRFDGALNVDVNEFQTNLVPYPRIHFMLSSYAPVISAEKAYHEQLSVAEITNSAFEPSSMMAKCDPRHGKYMACCLMYRGDVVPKDVNAAVATIKTKRTIQFVDWCPTGFKCGINYQPPSVVPGGDLAKVQRAVCMISNSTSVVEVFSRIDHKFDLMY…	545715	704564	911302	942625	776052	331952	941618	538215	505207	579248	508095	714131	665941	529525	604423	173488	184359	240740	252091	212670	508866	652491	594682	440822	549215
Bradi1g10480.1	4.30523e-09	1.26255e-07	1.48162e-08	2.00741e-11	2.88691e-10	3.44313e-12	3.44313e-12	0.552102	0.356966	0.552102	0.356966	0.42528	0.379811	MVLSHAVSAGSSDDSVHSTFASRYVRAALPRFRMPENSIPKEAAYQIINDELMLDGNPRLNLASFVTTWMEPECNKLMMDSINKNYVDMDEYPVTTELQNRCVNMIAHLFNAPLGETETAVGVGTVGSSEAIMLAGLAFKRRWQNKMKAAGKPCDKPNIVTGANVQVCWEKFARYFEVELKEVKLREGYYVMDPEKAVELVDENTICVAAILGSTLNGEFEDVKMLNDLLVKKNEETGWDTPIHVDAASGGFIAPFLYPELEWDFRLPLVKSINVSGHKYGLVYAGIGWCIWRSKEDLPEELIFHINYLGADQPTFTLNFSKGSSQVIAQYYQLIRLGFEGYKNIMDNCRENAKVLKEGLEQTGRFNIVSKDEGVPLVAFSLKDSSRHDEFEISEFLRR…	1.51978e+06	1.87603e+06	1.67851e+06	1.45489e+06	1.6323e+06	820256	811436	871138	1.10196e+06	901197	573854	506882	554563	695404	582676	661451	687321	729555	698412	694185	582948	610155	624420	662340	619966
Bradi1g10630.1	7.07693e-05	0.000215991	0.00147842	0.0980259	4.62377e-05	0.000143989	4.62377e-05	0.726294	0.289959	0.47615	0.726294	0.289959	0.309528	MADAEDIQPLVCDNGTGMVKAGFAGDDAPRAVFPSIVGRPRHTGVMVGMGQKDAYVGDEAQSKRGILTLKYPIEHGIVSNWDDMEKIWHHTFYNELRVAPEEHPVLLTEAPLNPKANREKMTQIMFETFNTPAMYVAIQAVLSLYASGRTTGIVLDSGDGVSHTVPIYEGYALPHAILRLDLAGRDLTDYLMKILTERGYSFTTTAEREIVRDMKEKLSYIALDYDQEMETSKTSSSVEKSYELPDGQVITIGAERFRCPEVLFQPSFIGMEAAGIHETTYNSIMKCDVDIRKDLYGNIVLSGGTTMFTGIADRMSKEITALAPSSMKIKVVAPPERKYSVWIGGSILASLSTFQQMWIAKAEYDESGPSIVHRKCF	11899.7	14701.3	20315.9	15052.7	15492.4	7689.36	7255.32	6828.27	7733.89	7376.71	9240	16429.1	9262.59	10076.5	11252	5871.98	3483.31	4774.84	3838.5	4492.16	3188.04	3092.66	8487.72	4412.87	4795.32
Bradi1g10880.1	0.014732	0.0220817	0.22291	0.128747	0.0158108	0.00589273	0.00589273	0.730583	0.453437	0.730583	0.684321	0.526986	0.453437	MSDSHETDKNIEMWKIKKLIKGLESARGNGTSMISLIMPPRDQVSRVTKMLGDEYGTASNIKSRVNRQSVLAAITSAQQRLKLYNRVPPNGLVLYTGTIVTDDGKEKKVTIDFEPFKPINASLYLCDNKFHTEALNELLESDDKFGFIIMDGNGTLFGTLSGNTREVLHKFSVDLPKKHGRGGQSALRFARLRMEKRHNYVRKTAELATQFFINPATSQPNVAGLILAGSADFKTELSQSDMFDQRLQTKILNVVDVSYGGENGFNQAIELSAEILANVKFIQEKKLIGKYFEEISQDTGKYVFGVDDTLKALEMGAVETLMVWENLDVNRYVLKHSVTAEIIIKHLNKDQEADQSNFRDETTNAELEVQEKTSLLEWFANEYKKFGCTLEFVTNKSQE…	3978.67	3944.8	7167.7	4590.17	4920.33	2500.44	3561.17	3193.54	5123.69	3594.71	3628.74	3295.24	2744.17	3800.22	3367.09	2199.91	3371.46	2989.69	1810.74	2592.95	2103.42	1228.39	2451.5	3140.93	2231.06
Bradi1g11430.1	0.0161386	0.0238979	0.698553	0.195145	0.00513598	0.0797934	0.00513598	0.903202	0.634482	0.903202	0.814301	0.634482	0.766411	MARLVLALSLLSAWGAEADLADDARALLAFRAAVGRHLAWNATDLGSACSWTGVTCDGGRVAMLRLPGRALAGDVPAGSLGNLTALHTLSLRFNALSGSLPADLASATALQNVILNGNKLSGDFPPAILALPGLVRLALDGNDLSGPIPPALANLTRLKVLLLNNNRFVGQIPELTAQLQQFNVSFNQLNGSIPSSLRSKPREAFLGMTGLCGGPLGPCPGEASPSPAPAVKPSSPTTPATDGENSPNGGENGEKNKKLSGGAIAGIAIGSVLGAALLLFLLICLCRRSGRTKTPALQMPPPSPTSALVAGSRKPPEVTSGAAVAPMNTVGHPQVSLGQSTSGKKLVFFGSAANVAPFDLEDLLRASAEVLGKGAIGTTYKAVLESGATVAVKRLKDVT…	37772.7	27208.2	46898.3	48569.3	40112.1	33074.3	35820.2	35848.4	40174.6	36229.4	34327.4	34947.9	32568.1	28810.1	32663.4	17971.9	25846.7	27888.2	30094.9	25450.4	29664.4	31987	29190.4	32127.7	30742.4
Bradi1g11440.1	1.30644e-06	9.51408e-06	0.0119245	7.10688e-07	1.15772e-05	2.55454e-07	2.55454e-07	0.840241	0.610296	0.840241	0.620077	0.678473	0.610296	MVLFTVSKKDTKPFDGQKPGTSGLRKKVTVFQQPHYLANFVQSTFNALPADRVKGATIVVSGDGRYFSKDAVQIITKMAAANGVRRVWVGQDSLLSTPAVSAIIRERIAADGSKATGAFILTASHNPGGPTEDFGIKYNMENGGPAPESVTDKIFSNTKTITEYLISDDLPDVDISVIGVTTFSGPEGPFDVDVFDSATDYIKLMKTIFDFESIKKLLASPKFSFCFDGLHGVAGAYAKRIFVDELGASESSLLNCLPKEDFGGGHPDPNLTYAKELVDRMGLGKSTSNVEPPEFGAAADGDADRNMVLGKRFFVTPSDSVAIIAANAVQSIPYFASGLKGVARSMPTSAALDVVAKNLNLKFFEVPTGWKFFGNLMDAGMCSVCGEESFGTGSDHIRE…	799939	987976	947193	946748	920464	712527	782033	793974	805110	773411	605334	497169	574498	606032	570758	637123	622445	619738	618735	624510	545584	661313	460610	579514	561755
Bradi1g11670.1	1.20545e-06	8.88607e-06	3.86451e-05	3.52019e-07	5.42033e-06	6.69073e-07	3.52019e-07	0.51522	0.331477	0.51522	0.331477	0.33427	0.364254	MLLHGLWDKVTGKNKEAWKEGRIRGTAVLVKKDVLDLGDFHASLLDGVHKILGCEDGVAFHLVSATAADPNNGERGKVGKAAHLEELVVTMKSTAAGESVFRVAFEWDDSQGIPGAVIVRNTNRSEFLLKTLTLEGVPGRGTVVFVANSWIYPAAGDRVFFANDTYLPSKMPVLLVQYRQDELRNLRGDSKAGPYEEHDRVYRYDYYNDLGEPDKGEDHVRPMLGGSQEHPYPRRGRTGRRPTKTDPKSESRLPLLNLKKALNIYVPRDERFGHLKLSDFLGYSLKAITEAVVPIIRTYVDTTPKEFDSFQDIMNLYDGLLEVPHSPALAEIKKKIPFDFIKSILPVAGDDFLNLPFPHVVKSDRSAWRTDEEFAREMLAGVNPVCIRRLTEFPARSTL…	128228	161702	150511	104045	136122	65184.6	61373.4	65512.4	88459.9	70132.6	44351.7	41425.4	45682.7	49024.8	45121.2	68561.8	35359.9	46841.2	31242.4	45501.3	54169.6	40244.2	52946.8	50970.5	49582.8
Bradi1g11680.1	0.00247004	0.00465376	0.0194328	0.0164151	0.212349	0.000595344	0.000595344	0.794046	0.467764	0.655122	0.645494	0.794046	0.467764	MIIGGIIKKIKESKNAQLKGTVVLMRKNVLDLNDFGASLLDGIGEFLGKGITCQLISSTLVDTNNGNRGKVGAEAELEQWITSLPSVTTGESKFGVTFQWEVEKLGVPGAIIVKNYHSNEFFLKTITLDNVPGRGKLTFVANSWIYPATKYRYNRVFFANDTYLPSQMPPALRPYRDDELRNLRGDDQEGPYEEHDRVYRYDVYNDLGKDRPVLGGNADYPYPRRGRTGRKPSRKQPQLESRLKSILQQIYVPRDEKFGHLKMSDFIGYSIRAITQGILPAVRTLVDCTPGEFDSFQDIINHYEGGIKLPNIPALEELRKRFPLQLIKNLLPVGGDFLLKLPIPQIIKQDKHAWRTDEEFAREVLAGINPVMITRLTEFPPKSTLDPAKYGDHTSTITA…	1.53547e+06	2.09524e+06	2.05202e+06	1.06868e+06	1.68785e+06	1.00921e+06	1.14535e+06	919452	1.34899e+06	1.10575e+06	1.15162e+06	971448	1.08155e+06	1.15338e+06	1.0895e+06	1.56591e+06	1.44484e+06	1.26403e+06	1.08615e+06	1.34023e+06	705671	741793	820681	889918	789516
Bradi1g12040.1	0.0181068	0.026378	0.999997	0.843511	0.0714562	0.0236108	0.0236108	0.991276	0.386355	0.991276	0.844173	0.500326	0.386355	MGRLCSRRSVSFPVLLLLCCLSWQSCWLLHALPLCTDSRAPVALNGTLGFCSYRGSSCCDVAADAALQKQFKAMNVSDAPCAAVLKSVLCAKCNPFSADLFNSSSKIRMVPLLCNYTSSGSRSSQSKDSTQDYCKLVWETCKNVTILNSPFQPSLQGSARLPNSSSKLIDVWQSESTFCTSFGGSSNDQSVCFDGNAISFNTTEPPPSPKGVCLEKIGDGSYLNMAPHPDGSNRVFLSNQAGKIWLANVPEQGSGSTLQFDEANPFIDLTDEVHLDSEFGLMGIAFHPKFATNGRFFVSYNCDRTQSPSCAGRCSCNSDVECDPSKLGTDNGAPPCQYQVVVSEYSAKASSSNISAVTSANPSEVRRIFTMGLPYRAHHGGQILFGPADGYLYLMMGDG…	5562.62	8067.48	7740.13	5701.03	6767.81	7003.85	4729.69	6229.19	8872.36	6708.77	5614	3866.88	5640.24	7731.7	5713.2	3052.14	2005.24	6390.28	2096.79	3386.11	1541.21	1030.61	6372.06	1515.25	2614.78
Bradi1g13630.1	3.00498e-06	1.7851e-05	0.612138	4.5663e-05	3.22193e-05	6.2357e-06	6.2357e-06	0.887969	0.317015	0.887969	0.40186	0.338248	0.317015	MVFVKTQKTRAYSKRFQVKFKRRRQGKTDYRARLRLTNQDKNKYNTPKYRFVVRFTNKDVTAQIVYATIAGDIVMAAAYSHELPRYGLEVGLTNYAAAYCTGLLLARRVLKCRDLDQEYEGNVEATGEDFSVEPSGERRPFRALLDVGLIRTTTGNRVFGALKGALDGGLDIPHSDKRFAGFKKDEKQLDSEVHRKYIYGGHVADYMRSLADEEPEKYQSHFSEYIKKGISADDIESVYKKVHAAIRADPTLVKSTKEAPKTHKRYNLKKLTYEQRKASLVERLNALNSSAGAADDEDDDE	15703.7	26096.2	27709.8	18747.5	22064.3	18816.6	17246.5	20900	21406.6	19592.4	6404.73	8322.48	11088.2	9651.58	8866.75	7681.68	8528.32	7934.89	5707.91	7463.2	6865.61	4498.51	8496.05	8118.71	6994.72
Bradi1g13640.1	0.0355829	0.0479533	0.0978258	0.0150239	0.0303145	0.0937074	0.0150239	0.680729	0.549741	0.680729	0.549741	0.596807	0.677971	MFGRAPKKSDNTKYYEILGVPKNASQDDLKKAYRKAAIKNHPDKGGDPEKFKELAQAYEVLSDPEKREIYDQYGEDALKEGMGGGGGGVDPFDIFSSFFGPSFGGGGGSSRGRRQRRGEDVIHPLKASLEDLYNGTSKKLSLSRNVLCSKCKGKGSKSGASMRCPGCQGSGMKVTIRQLGPSMIQQVQHACNECKGTGESINEKDRCQGCKGEKVVQEKKVLEVHVEKGMQHNQKITFPGEADEAPDTVTGDIVFVVQQKEHPKFKRKGDDLFYEHTLSLTEALCGFQLVLTHLDNRQLLIKSNPGEIVKPDSFKAISDEGMPMYQRPFMKGKLYIHFTVEFPDSLAPEQCKALEAVLPPKPVSKLTDMELDECEETTLHDVNNMEEEMRRKAQAAAQE…	10476.5	9791.82	11889.5	8674	10207.9	6964.94	4872.71	7834.5	8123.23	6948.85	4848.4	8634.01	3830.37	5134.14	5611.73	8140.05	5845.34	2570.35	7812.94	6092.17	9136.38	5485.07	4970.41	8090.91	6920.69
Bradi1g13850.1	0.00010031	0.000288298	0.0330069	0.000184036	0.000379798	6.43696e-05	6.43696e-05	0.699595	0.388815	0.699595	0.416185	0.463439	0.388815	MALAISMEAIDARARELGIDIDSVDVDSITLPPGEDFDILSDDEDLLHNEDLPELEMGFANIIVVDNLPVVPPEKYEKLENVVRKIYSQIGVIKEGGLWMPTDPETKKTLGYCFIEYNTPQEAELAREKTNGYKLDKSHIFAVNMFDDFDKYMKVPDEWAPAEIKPYTPGENLLKWLTDEKARDQFVIRAGTFTEVYWNDARRAMPELVYQKQYWTDSYIQWSPLGTHLATVHRQGAQVWGGDDKFVRLMRFAHPQVKLIDFSPGEKYLVTYSSHEPSNPRDTHRVVLNIFDVRTGKVMRDFKGSADEFTTGGSIGVSGVSWPIFRWGGGRDDKYFARLGKNVISVYETETFSLLDKKSLKVENVVDFSWSPTDPIISLFVPELGGGNQPARVSLVQIP…	13704	20090.4	15537.6	11451.5	15195.9	9905.28	10201.9	9350.77	13065.8	10631	7670.84	5778.26	4646.55	7201.51	6324.29	6982.69	6543.57	9538.32	5104.85	7042.36	6442.61	4730.97	4510.86	7949.11	5908.39
Bradi1g13890.1	0.00657462	0.0108606	0.0313435	0.559571	0.00240883	0.050983	0.00240883	0.84822	0.477286	0.635515	0.84822	0.477286	0.666791	MAASVKLGSKPDAFRRQGQAWFCTTGLPSDVTVEVGDMSFHLHKFPLLSKSAVLEQLIEESSDQEECTITLSDIPGGTKSFELVARFCYGVKIELSSANVVYLRCASEHLQMTEEISEDNLIAQSEMFLNQVVLRNWKDSLKALETCDDLLPHAEDLQIVKRCIESLAAKATTDPNLFGWPIREHGIMQSPGGSVLWNGISTGARPRNFSSDWWYDDASALSFPMYKRLISAMESRGVRPETIAGSLAYYARKYLPGLNRRNSTGIAPPTATLSEVEQKNLLEEINTLLPVQKGLASTKLLLGLLRIAMIQRASSTCISDLEKRVGMQLDQASLEDLLLPNFSYTMETLYNVECVHRILEHFLAMDQANGGASPCMDDVMASPSMIPITAVAKLIDGYL…	52614.6	50141.3	83898.1	89580.3	69058.6	33752.7	48057.7	42542.3	51198.3	43887.8	49097	61965.1	53193.8	70051.5	58576.9	22869.6	39539.1	35354	34080.2	32960.7	42423.5	55904.7	51998.7	33863.8	46047.7
Bradi1g13900.1	2.72015e-07	2.80113e-06	0.0538354	3.54609e-06	6.73067e-07	8.89518e-08	8.89518e-08	0.803679	0.324375	0.803679	0.432581	0.324375	0.37652	MAEAEAEADVGGGVRRRQRGCAGEFFPEASFSSWAAYGRALRSTGPRLADRLTSRSLEATELHEVRARSGADMKRDLTWWDLAWFGVGAVIGAGIFVLTGQEAKEVVGPAVVISYVVSGVSAMLSVFCYTEFAVEIPVAGGSFAYLRVELGDFMAFVAAGNILLEYCIGSAAVARAWTSYFATLLNHQPAQFRIHASSLAADYSELDPIAVVVITLICAFAVVSTKGSSRFNYVLSIVHIAVILFIIVAGLTKADTANMRDFMPYGPRGIFAASAVLFFAYIGFDAVSTMAEETKDPARDIPIGLVGSMAITTALYCVLAVVLCLMQPYGDIDKDAPFSVAFAARGMDWAKYIVAFGALKGMTTVLLVSAVGQARYLTHIARTHMMPPWLAEVHPRTGT…	149947	120938	118114	110134	124783	88894	77642.1	116558	118048	100286	61823.8	50263.2	56419.3	47409.3	53978.9	43796.9	46150	35094.7	36864.7	40476.6	50500.5	37901.9	45123.8	54407.5	46983.4
Bradi1g15050.1	0.00240829	0.0045565	0.239349	0.00442034	0.00278225	0.00329051	0.00278225	0.82463	0.602681	0.82463	0.623794	0.602681	0.609662	MAGTVTVPGSSVPSTPLLKDQLDIVIPTIRNLDFLEMWRPFFQPYHLIIVQDGDPSKVIKVPEGFDYELYNRNDINRILGPKASCISFKDSACRCFGYMVSKKKYVFTIDDDCFVAKDPSGKDINALEQHIKNLLSPSTPFFFNTLYDPYREGADFVRGYPFSLREGAPTAVSHGLWLNIPDYDAPTQMVKPRERNSRYVDAVLTIPKGTLFPMCGMNLAFDRTLIGPAMYFGLMGDGQPIGRYDDMWAGWCVKVICDHLSLGVKTGLPYLWHSKASNPFVNLKKEYKGIFWQEDIIPFFQNATLSKECDTVQKCYISLSEQVREKLGKIDPYFVKLADAMVTWIEAWDELNPSAAASEAVAENGKATK	472365	752866	831811	764493	705384	462081	577435	611855	675352	581681	417995	428289	419950	493821	440014	373650	334207	492149	500479	425121	445196	493052	426677	355258	430046
Bradi1g16000.1	0.00348109	0.00626969	0.302967	0.0204578	0.0018554	0.00608199	0.0018554	0.801706	0.484009	0.801706	0.627579	0.484009	0.554771	MSWWWAGAIGAVKKRQDESAAAAEPSFQSVALVVGSTGIVGTSLLDILPLQDTPGGPWKVYALSRRPLPPWSPPPSPAVTHLHLDLADSAAVADALTPLTDITHVFYVAWSNHPTEAQNREANSAMLRNVLSVVVPNCPALVHVCLQTGRKHYIGPFEAIGKIPAPDPPYTEDMPRLDYPNFYYDQEDVLFDEVSRRGGAVSWSVHRPTTIFGFSPRSAMNVVGSLCVYAAICRKEGATMRWPGSKVAWEGFSDSSDADLIAEHEIWAAVDPFAKNEAFNCSNGDLYKWKQLWPMLADHFEVEWAGYDGEENRFMLTQAMAGKEAVWAEILQENELIRTELEEITNWWFVDALFNVETQHLDSMNKSKEHGFLGFRNTTNSFNTWIEKMKVFKIVP	74737.1	128453	178462	137850	129876	112006	97205.4	104584	102692	104122	83984.9	64808.3	86194.5	91041.2	81507.2	78849.8	54282.3	59626.9	58684.7	62860.9	71763.2	81581.3	82821.4	52038.8	72051.2
Bradi1g16510.1	0.000209747	0.000537924	0.900274	0.000210344	0.020605	0.999967	0.000210344	0.993762	0.576296	0.946908	0.576296	0.750414	0.993762	MAAKCYPTVTDEYQTAVAKAKRKLRGLIAEKNCAPLMLRLAWHSAGTFDVATKTGGPFGTIKCPAELAHGANAGLDIAVRLLEPIKDQFPILSYADFYQLAGVVAVEVTGGPEVPFHPGRQDKPEPPPEGRLPDATQGSDHLRQVFSTQMGLSDQDIVALSGGHTLGRCHKERSGFEGAWTANPLIFDNSYFKELLSGEKEGLLQLPTDKTLLSDPAFRPLVDKYAADEDAFFADYAEAHLKLSELGFGGYFEGCC	415290	422969	374669	276660	372397	377191	406138	308509	318665	352626	205956	209369	182057	261062	214611	299170	276540	277015	265083	279452	341864	362505	390051	385876	370074
Bradi1g16750.1	0.000591396	0.0013303	0.997755	0.641006	0.00212239	0.00263397	0.00212239	0.972862	0.48884	0.972862	0.870176	0.48884	0.513045	MGQGTPGGMGKQGGGAPGDRNKPGGDGDKKDRKFEPPAAPSRVGRKQRRQKGPEAAARLPHVAPLSKCRLRLLKLERVKDYLLMEEEFVAAQERLRPTEEKTEEDRSKVDDLRGTPMSVGSLEEIIDESHAIVSSSVGPEYYVGILSFVDKDQLEPGCSILMHNKVLSVVGILQDEVDPMVSVMKVEKAPLESYADIGGLDAQIQEIKEAVELPLTHPELYEDIGIRPPKGVILYGEPGTGKTLLAKAVANSTSATFLRVVGSELIQKYLGDGPKLVRELFRVADELSPSIVFIDEIDAVGTKRYDAHSGGEREIQRTMLELLNQLDGFDSRGDVKVILATNRIESLDPALLRPGRIDRKIEFPLPDIKTRRRIFQIHTAKMTLSDDVNLEEFVMTKDE…	9506.35	9640.55	6729.83	5643.98	7880.18	10203.4	6646.9	7719.86	6095.15	7666.32	6941.5	6582.32	6534.13	7370.62	6857.14	3231.48	4191.19	3299.39	4686.52	3852.15	4565.35	3071.54	4382.38	4152.29	4042.89
Bradi1g17200.1	2.42582e-06	1.52917e-05	0.922046	0.000510797	0.0126895	0.0225099	0.000510797	2.2003	0.185052	1.1483	2.2003	0.185052	0.255514	MAPLMNGSCKSEEKKLPGAYVTFLAGTGDYWKGVVGLAKGLRAVKSAHPLVVAVLPDVPASHRQILASQGCLVRAIQPVYPPESQTQFAMAYYVINYSKLRIWEFVEYERMVYLDADIQVFSNIDHLFDLEKGSFYAVKDCFCEKTWSHTPQFKLGYCQQRPDKNVSWPADTPAPPPLYFNAGMFVHEPSMATARALLEKLVVTDPTPFAEQDFLNVFFRDAYKPIPLVYNLVLAMLWRHPENVELDAVKVVHYCAAGSKPWRFTGEEENMEREDVKMLVKKWWDVYNDDSLDFDDSYKELKKKSEAGGVVFDHEAGGKPARRGATAMADGAGAVKYSNTPSAA	8077.5	16395.4	15399.6	8112.24	11996.2	16114.8	20912	6156.56	11917.7	13775.3	22799.1	25587.3	24919.6	32274.9	26395.2	875.187	1557.05	2347.95	4099.5	2219.92	2294.48	2259.64	5443.91	2262.72	3065.19
Bradi1g17236.1	0.00821559	0.0132728	0.488305	0.0158849	0.00441444	0.040063	0.00441444	0.778625	0.350011	0.778625	0.456289	0.350011	0.533699	MADQLTDDQIAEFKEAFSLFDKDGDGCITTKELGTVMRSLGQNPTEAELQDMINEVDADGNGTIDFPEFLNLMARKMKDTDSEEELKEAFRVFDKDQNGFISAAELRHVMTNLGEKLTDEEVDEMIREADVDGDGQINYEEFVKVMMAK	18315.5	29671	46428.7	32910.6	31831.5	18806.6	31338.2	20609.2	28385	24784.8	14797.3	13433.7	14026.5	15839.8	14524.3	15328.4	8464.87	10538.4	10233.7	11141.3	9607.24	9437.52	29684.5	19224.4	16988.4
Bradi1g17920.1	0.0019822	0.00384747	0.395257	0.00811224	0.00258451	0.00266638	0.00258451	0.660585	0.0492379	0.660585	0.175729	0.0492575	0.0492379	MVSLKLQKRLASSVLKCGKGKVWLDPNEVNEISMANSRQNIRKLVKDGFIIKKPQKIHSRSRARRAHEAKQKGRHSGYGKRRGTREARLPTKILWMRRMRVLRRLLRKYREAKKIDKHMYHDMYLKVKGNMFKNKRVLMESIHKSKAEKAREKTLSDQFEAKRAKSKASRERKIARREERLAQGPKDYAPAAAAAPAPTAAAPKKAKK	13745.6	27327.9	47991.9	39554.1	32154.9	23654.8	41613.9	437.076	19258.3	21241	5891.13	7643.57	1285.48	7782.05	5650.56	4775.27	0	525.275	1034.93	1583.87	651.601	1384.16	1550.76	2746.42	1583.24
Bradi1g17970.1	0.000169309	0.000452273	0.446506	0.00317236	0.000146418	0.000532304	0.000146418	0.81668	0.280723	0.81668	0.467169	0.280723	0.349195	MGIDLVAGGRNKKTKRTAPKSDDVYLKLLVKLYRFLVRRTKSHFNAVILKRLFMSKTNRPPLSMRRLVRFMEGKGDQIAVIVGTITDDKRVYEIPAMKVAALRFTETARARIVNAGGECLTFDQLALRAPLGQNTLLLRGPKNAREAVRHFGAAPGVPHSHTKPYVRSKGRKFEKARGRRNSRGFKV	9944.56	13657.9	9049.2	10628.2	10820	4751.58	7875.49	10868.7	11850	8836.44	4369	5846.8	4534.77	5468.41	5054.75	1544.44	2675.62	3534.1	4395.5	3037.41	2513.8	4316.21	2184.87	6098.23	3778.28
Bradi1g18010.2	9.88877e-07	7.75578e-06	0.00151509	1.39491e-05	4.58346e-06	4.66337e-08	4.66337e-08	0.700722	0.404435	0.700722	0.554766	0.429296	0.404435	MARGAAAAAAAKGGAGGKKKGSVSFVIDCTKPVEDKIMEIASLEKFLQERIKVAGGKAGNLGDSVTVSRDKSKVTVTSDGAFSKRYLKYLTKKYLKKHNVRDWLRVIAANKERNVYELRYFNIAENDGEEED	49129.5	60503.6	47612.3	41162.5	49602	33845.7	34384.8	29142.3	41656	34757.2	28311.8	25932.9	27771.9	28053.5	27517.5	21694.1	18793.3	20312.7	24375.7	21294	17500.3	18396.4	24264.3	20082.2	20060.8
Bradi1g18190.2	8.92876e-06	3.97521e-05	0.20441	0.00137979	4.09199e-06	3.51151e-05	4.09199e-06	0.817185	0.324177	0.817185	0.5697	0.324177	0.359028	MQNEEGKMVDLYVPRKCSATNRIITAKDHASVQINIGHVDENGLYDGRFTTFALSGFVRGQGDADGALDRLWQQKKAELKQ	23709.8	32253.3	23861.5	23272.4	25774.3	14280.7	19903.2	25380.6	24684.8	21062.3	12323	14504.9	16027.1	15879.4	14683.6	10071.8	8508.34	9077.44	5764.1	8355.43	6578.45	9945.56	7744.49	12746.2	9253.67
Bradi1g18550.2	0.000110791	0.000314278	0.20263	0.00257432	2.47337e-05	0.00170013	2.47337e-05	0.817309	0.390436	0.817309	0.602682	0.390436	0.582034	MKGAELLTLLVASFLCLSAAIAAQETCPADLDAKCGDGASDDWEGEFFPGIPKIKYEGPTSKKPLSYKWYNAEEVILGKKMKDWLRFSVAFWHTFRGTGGDPFGAPTKVWPWEDGTNSLAMAKRRMKAHFEFMEKLGVDRWCFHDRDIAPDGKTLAETNANLDEIVKLAKQLQGETNIKPLWGTAQLFMHPRYMHGAATSPEVKVYAYAAAQVKKALEVTHYLGGENYVFWGGREGYQTLLNTDMKRELEHLANFLQAAVDHKKKIGFNGTLLIEPKPQEPTKHQYDWDVATTFSFLQKYGLTGEFKINVECNHATLSGHSCHHELETARINGLLGNIDANTGDPQVGWDTDEFLTDISEATLVMSSVVKNDGLAPGGFNFDAKLRRESTDVEDMFIAH…	152249	201109	263018	176018	198099	142292	192755	145110	167473	161908	126167	104872	106376	140147	119390	66302.4	71065.5	87369.1	84641.9	77344.7	100527	125661	131273	103738	115300
Bradi1g18710.1	1.38862e-06	9.70597e-06	0.0258871	9.55624e-06	4.7757e-07	3.72585e-06	4.7757e-07	0.806758	0.443374	0.806758	0.569818	0.443374	0.539776	MAVSFSELHTADGLKALEAHLAGKTYISGEQISKDDVKVFAAVPSKPSAEFPNAARWYDTVAAALASRFPGKASGVNLSAAGSSSGPADASKDAEDDDDLDLFGDETEDDKKAAEERVAAKPAKKKESGKSSVLMDVKPWDDETDMKKLEEAVRSVQMEGLTWGASKLVAVGYGIKKLQIMLTIVDDLVSVDTLIEEVLCEEPINEYVQSCDIVAFNKI	195697	245127	246692	221881	227349	174954	200183	166561	191966	183416	137356	138304	108288	134242	129548	133496	101762	88304	79641.4	100801	103398	104161	144045	139266	122718
Bradi1g19660.1	9.33184e-05	0.000273073	0.241066	0.880405	0.000740382	0.510755	0.000740382	1.13626	0.646825	1.13626	1.05331	0.646825	0.902701	MDSRAFFLCALAIVASSLLHCARSDGSDDQLLKGINSYRGSLKVPALTENKNADCLAEQLAKQFKDQQCTNTTGSNTVPGTEQQFPDYPKYLDRCHLNASVTEDGQVMPACVPGLVANVVLTNYTKSQYNLYLNDSKYSGVGIANEGDWVVVVLSTNTDSGDYSPAPPGSNWAPSVRPFSQLIVSLVGFVILLLK	526586	601841	683536	640883	613212	772027	673198	633565	708280	696767	654061	613558	589343	726642	645901	392427	318420	413426	462290	396641	615510	453893	605225	539560	553547
Bradi1g19720.1	0.00105485	0.00220961	0.223543	0.998369	0.999966	0.00793106	0.00793106	1.33804	0.343456	1.33804	0.961602	1.01437	0.343456	MEAAADEQGAVVVVAPPALPLTVRLQLAGLTAAIDAVERADGTVSRCLYSVVDRLLSARARTASGVRSHDVDLDASRNIWARVFSPAAANAHPPSAPLPVVVYFHGGGFALFSPAIGPFNGVCRRLCSVLGAVVVSVNYRLAPEHKFPAAYDDGVDALRFLDAHDGTIPGLTSMAVDLGSCFLAGESAGGNIVHHVANIWASQHQRTSRHVRLAGIFPVQPYFGGEERTPSEVRLEGIAPVVNLRRSDWSWKAFLPAGATRDHPAAHVTDDNAGLAEEGFPPVMVVVGGFDPLQDWQRRYADVLRRKGKRVTVAEYPDGFHGFYGFPELDDAWKVLEDMKAFVESNRAVAPPAKLPDAER	4595.99	7675.02	5807.09	8136.59	6553.67	10594.5	10485.8	8439.34	5556.63	8769.08	5193.61	5785.95	6184.03	8044.51	6302.03	4332.7	8075.79	5849.03	8333.81	6647.83	2484.54	2972.8	1741.11	1805.15	2250.9
Bradi1g19750.1	0.00388909	0.00691223	0.78353	0.999418	0.036595	0.0391995	0.036595	1.13808	0.553138	1.13808	0.974568	0.553138	0.559049	MEASKTKESQGAAADDEIQPRPAAASPPALPWTVRLQVLALVTATDLSQRRDGTVNRFLFSLGDRQTPARARPDALGVRSADVTVDASRNLWARVYSRSSSGSSAVPVPVVVYFHGGGFAFLSAASTPLDGMCRRLCRELGAVVVSVNYRLAPEHKFPAAYDDGEAVFRHLAANNDIFPVPVDLSRCFLAGDSAGGNIAHHVAHRWTSDAEPDPVVFRLAGIILLQPYFGGEERTAAELSLEGVAPVVNMRRSDWSWKAFLPVGADRNHPAAHVTGEAAPEPELGENFPPAMVAVGGLDPLQDWQRRYAAMLRRKGKAVRVVEFPEAIHAFYCFPELPDSGKLVEDVKAFIDRNGGTRVL	18433.7	25738.8	38538.8	44978.7	31922.5	41207.7	40348.8	27567.1	36197.8	36330.3	24135.6	34068.2	34666.1	31572.7	31110.7	21560.5	19991.4	16604.5	12473.7	17657.5	11971.8	19479.6	22544.7	17388.9	17846.3
Bradi1g20880.1	1.94517e-06	1.29263e-05	0.073387	0.00056275	6.65795e-07	4.56631e-07	4.56631e-07	0.793931	0.324167	0.793931	0.585047	0.365304	0.324167	MAASEGGAPALTQQQQDIQMMLAADVHLGTKNCDFQMERYVFKRRTDGIYIINLGKTWEKLVMAARVIVAIENPQDIIVQSARPYGQRAVLKFAQYTGANAIAGRHTPGTFTNQMQTSFSEPRLLILTDPRTDHQPIKEAALGNIPTIAFCDTDSPMRYVDIGIPANNKGKQSIGCLFWLLARMVLQMRGTILPGHKWDIMVDLFFYRDPEEAKELEEEEALVAPDYGAVAEYAAPTADTWGGEWPGAAAPPAAAVAEAGADWTGAAAPAADAGWDAVAAPPPAATGWEQGNAPAPAAATPNWE	66139.2	81584.7	83120.5	68723.9	74892.1	63427.3	62615.8	45497.7	66295.5	59459.1	37006.8	54093.4	31941.8	52219.7	43815.4	36821.7	33910	19722.5	18979.2	27358.3	25900.1	23417.2	24156.2	23636.6	24277.5
Bradi1g20995.1	0.0315127	0.0429401	0.0503384	0.0706291	0.0285597	0.0155716	0.0155716	0.654935	0.549726	0.630624	0.654935	0.590676	0.549726	MAAALARAMSTSAAIAPPVSLDTINPKVLEFKYAVRGEIVTHAQYGVSLFRNLNHGLALPLQNLENELQKHPESLPFDEILYCNIGNPQSLGQHPVTFFREVLSLCDHPALLDKSETHALYSSDAIERAWQILDKIPGRATGAYSHSQGIKGLRDEIAAGIAARDGFHASGDNIFLTDGASPAVHMMMQLLIRSEKDGILCPLPQYPLYSASITLHGGSFVPYFLDEETGWGLEVEELKKQVDEARSKGITVRALVVINPGNPTGQVLAEENQKKIVEFCKNEGLVLLADEVYQENIYVEDKQFHSFKKIARSMGYTDDDLPLVSFQSVSKGYYGECGKRGGYMEVTGFSADVREQIYKVASVNLCSNIGGQILSSLVMNPPKAGDESYESFMVEKDGI…	3989.25	4918.71	2851.84	2107.64	3466.86	2639.67	2036.33	1685.95	2383.19	2186.29	1888.27	2522.02	2469.02	2202.97	2270.57	1431.27	1617.64	2455.13	2687.12	2047.79	1965.74	2141.78	1781.79	1734	1905.83
Bradi1g21260.1	3.01707e-06	1.7851e-05	0.330965	0.00383448	1.01091e-06	5.73858e-06	1.01091e-06	0.849476	0.287411	0.849476	0.627623	0.287411	0.333887	MDSKPATAPSAAPSAEKEGSAYPRMSPEDLAPPPPPVVLPASANPYVLSSASSSQPPAKSTRENLREMFGQVGKMFGEAARKTEGIAGDVWQHLKTGPSITDAAMGRIAQISKVISEGGYDKIFQQTFECLPDEKLKKAYACYLSTSHGPIMGVLYVSTAKLAFCSDSTVAYVTEDNKTASAIYKVVIPVPHLRSVTPTASQQNPAERYIQVVSVDNHEFWFMGFVNYDSAVKCLQDAVRGSG	22191	31807.7	39033.7	25837.5	29717.5	26139.4	25027.4	23197.8	26612.5	25244.3	14334.6	19877.4	20663.1	19730.3	18651.4	12399.1	8988.67	5646.91	7129.84	8541.13	10402.1	8285.55	11142.7	9858.78	9922.28
Bradi1g21550.1	2.01525e-06	1.32512e-05	0.000794651	6.3708e-06	4.7744e-07	4.36898e-07	4.36898e-07	0.731518	0.527099	0.731518	0.583645	0.527099	0.541029	MAASFSNVNSEAGLKKLNDYLLSRSYISGYQASKDDMGVYSAFSVAPPSKYTNVVRWYNHIDALLKLSGVTAPGQGVKVESSVVPEVSTPDVSEAPAADDDDDDDVDLFGEETEEEKKAAEERAAKVKASGKKKESGKSSVLLDVKPWDDETDMAKLEEAVRSVKMEGLLWGASKLMPVGYGIKKLQIMMTIIDDLVSVDTLIEDHLCVEPANEYIQSCDIVAFNKI	167681	227583	191786	172852	189975	141794	135352	132129	146606	138970	107521	109206	109168	117617	110878	96049	115324	99570.1	89600	100136	96868.5	83873.4	118423	111965	102782
Bradi1g21630.1	5.61566e-07	4.8561e-06	0.025299	9.10801e-06	8.91279e-08	1.33902e-06	8.91279e-08	0.717086	0.179467	0.717086	0.325899	0.179467	0.228729	MTTRFKKNRKKRGHVSAGHGRIGKHRKHPGGRGNAGGMHHHRILFDKYHPGYFGKVGMRYFHKLRNRFYCPSVNVERLWSMVPAEKAAEAGGDKAPVVDVSQFGYFKVLGKGLLPEKPIVVKAKLISKVAEKKIKAAGGAVVLVA	26277	37144.8	38324.5	29419.5	32791.5	17266.6	28200.5	24810.2	23779.8	23514.3	12065.8	13795.3	5480.14	11405.5	10686.7	9509.52	7584.32	3998.64	2447.41	5884.97	12052.5	4654.64	4964.76	8329.47	7500.35
Bradi1g22500.1	9.44849e-06	4.1518e-05	0.0268572	4.30148e-05	8.66315e-07	7.4677e-05	8.66315e-07	0.797251	0.477214	0.797251	0.594007	0.477214	0.605619	MEDAVVSAGGGAINVLLCKLGTVLIQEAQLLGGIRGELQYMKDELESMTAFLQDLAERENHRKQLKIWMKQVREVAYDVEDCVDEFTHHLGSSTSGSGLPEFVHRCIRFIQTARVRRQIAKQIQELKVRATSISDRNSRYGGNHIISEGNTFAAQPALSTVISLDVRTPALFPEITKLVGIEARQKNLVNWLVDESVEQLLVISISGFGGLGKTTLAMTTYQTASASFQCRAFVTVSQKFDVRTLIKDILRQIVQPVDQNDPAPAEDPLKGIEEWDVGQLASILRGHLEDKRYLIVLDDIWTISAWEGIRFALPNSTGSRIMVTTRIKTVVQACCLHQHDRAYEIEPLTGSESSELFFTRLFGNRDNCPTVLEEISEKILGKCGGIPLAIVSITGLLAS…	20719.7	23438.9	29442.6	21757.8	23839.8	17716.6	20351.4	17622.8	20334.3	19006.3	14341	15228.7	13044.7	14029.6	14161	13563.3	11601.6	10998.6	9343.19	11376.7	14820.6	11943.5	16626.6	14360.6	14437.8
Bradi1g22980.1	0.00480282	0.00827593	0.462945	0.019314	0.0203524	0.00193336	0.00193336	0.785941	0.336334	0.785941	0.506073	0.509891	0.336334	MGTRGGFVIAVVLRELLSSAAAAADDGSLRRRSLHQPFFPIEWSPPPPASGSVVLPTPPPASAAAASTTSPARSAPSFTNTIAIALTAGLVALAVVSYSCVLLWRRVSDGGGEDDGRATTATSTKPVAVGAVPARVPSDVGSSSRRHRSPPPSSTASDAIYLDPLTSLMEVHQHRASPDLRPLQLPKQPSLSPDLRPLPPLKRPVSHPPPPPASTPPMTATTEYSSEEDDQATYYTARKTAMSSFSRSTSQRSTLEQTAPPPAPAPVPPPPPPQVNHLRPPRPPPPPPLPRQRLLRPLPSESPPPAALANLALTSPPEPSIQNRGIENSDVLGGSTRPPNLKPLHWDKLRAISGRTTVWDQVKNSDSFRVDEAAMESLFPRSGVPAAGNSDQAVARGAP…	7709.11	5572.64	4188.23	2737.35	5051.83	2966.27	3911.85	4144.01	4859.64	3970.44	3226.01	1922.71	2177.52	2900.13	2556.59	2165.5	3290.2	2524.57	2323.26	2575.88	2503.05	1707.44	1377.83	1208.1	1699.1
Bradi1g23520.1	2.02659e-08	3.87754e-07	1.08881e-05	3.04419e-07	1.44232e-10	1.59461e-12	1.59461e-12	0.651499	0.373002	0.651499	0.557986	0.416168	0.373002	MAAASTTDGGVGAILTAGERDYLVRNSGEQVKISSIEAGTVALYFSASWCPPCRRFTPKLIEAYKELASQGKSFEVVFVSGDQDEEAFNAYFAKMPWLAVPFTDSEGRKSLDERFQVRGIPHLVILDAKTGKVCTEDGVEFVSEYGIDAYPFTPERINELKEQEKAAKDNQTIHSVLSAPTRDYLISNKGDKVPISDLEGKYVGLCFVVSGYGPVEEFTTVLAKIYGKLKEVGKKFEVVAVSMDNDEASFNESFQNMPWLAIPQGDKMCQKLVSYFELNDLPTLVLIGPDGKTLNSNIADIIEENGVESWEGFPFNAEKLEILAEKARAKAESQTLQSLLVTGDLDFVIGKDGAKVPVSQLVGKTVLLYFSAQWCGPCRAFLPTLVDVYNKIKEKNSDF…	369815	384627	436184	364316	388736	300572	269543	201158	241770	253261	231243	207190	198962	230241	216909	167462	180547	142102	157005	161779	150922	121487	172618	134970	144999
Bradi1g23600.1	0.000760607	0.00166864	0.98585	0.198447	0.00159408	0.0026731	0.00159408	0.937977	0.267954	0.937977	0.679541	0.267954	0.312064	MAASSRRASQLLGSAASRLIHARGYAAAPSPAVFVDKSTRVICQGITGKNGTFHTEQAIEYGTNMVGGVTPKKGGTEHLGLPVFNSVAEAKAETKANASVIYVPPPFAAAAIMEAMEAELDLVVCITEGIPQHDMVKVKAALNRQSKTRLIGPNCPGIIKPGECKIGIMPGYIHKPGRIGIVSRSGTLTYEAVFQTTAVGLGQSTCVGMGGDPFNGTNFVDCLEKFVADPQTEGIVVIGEIGGTAEEDAAAFIQESKTEKPVVAFIAGLTAPPGRRMGHAGAIVSGGKGTAQDKIKALRDAGVTVVESPAKIGSTMFELFKQRGMVE	4043.47	7870.35	5497.84	3130.94	5135.65	4575	4498.55	4480.59	5714.35	4817.12	2441.2	2650.54	4908.54	3959.26	3489.89	1983.59	393.718	1788	1339.17	1376.12	1389.68	2657.39	883.126	1480.42	1602.65
Bradi1g23640.1	2.18027e-05	8.10664e-05	0.661597	0.304522	0.000207239	0.000987692	0.000207239	1.08184	0.583557	1.08184	0.872293	0.583557	0.641811	MLGRRRNNMLPKRLEGVLLLLFMLMVSNASGAFVGVHVGTGVSDLPSPSDIVSILKAKRIQHVRLVDSDHKMLVALANTGIEVMVGVPNDQLLRVGQSRSTAADWINKNVAAYIPATNITYIAVGDEVLTTIPNAALVLVPALQFLQSALLAANLNTQVKISSPHSMDMISKAFPPSTATFNSTWSSIMSQYLQFLNNTGSSFMLNAQPYYGYVKGQGVFPLEYALFRSLNPNSKIADPNSNLFYTNMFDAMVDAAYNSMQAMNFTGIPVMVTASGWPWRGARNEPAADVDNALAYNTNLIRHVLNSSGTPSQPKNQVSTYLFELFSEDRRTGPVSEQNWGIMFTNASAVYSLAFEDVAANNTDSPALRGMFCVANSSASHSALKQSLDWACGPGSANC…	131471	165700	149670	145059	147975	142312	159092	171218	167721	160086	121894	116239	161089	117089	129078	64652.1	81178.4	95615.3	103962	86351.9	108165	98663.8	91444.8	81614.4	94972.1
Bradi1g25220.1	0.000226574	0.000575608	0.0377584	0.00465612	3.23856e-05	0.00774561	3.23856e-05	0.694023	0.303711	0.694023	0.57941	0.303711	0.607323	MDRAELTTEQVLKRDIPWETYMSTKLISSTCLQLLRRYDHKPESERGPLLDEDGPSYVRIFLNILRSISKEETVEYVLALIDEMLAVNPKRAALFYDESLSGEDIYDPFLS	58482.4	100944	115562	84495.8	89870.9	62775.7	63213.2	57115.8	66384.9	62372.4	41676.9	49971	45890.5	70749.9	52072.1	34792.8	26125.7	25905.7	22354.9	27294.8	44203.4	56498.1	68324.4	49296.6	54580.6
Bradi1g25647.1	0.000137618	0.000375802	0.958449	0.999996	0.000788033	0.0016475	0.000788033	0.99553	0.553781	0.952071	0.99553	0.553781	0.580746	MASHHQHHHLPSHLAPAAALLLAFLLAPPAAALTPLCGKNSNYTANSTYQANIRALSLTLPKSANSSRTLFATGRVGALPDIVYALALCRGDTSASACGACVATAFQDAQQLCAYDRDASVFYDPCFLRFSDQNFVSDTSGDNGNSIALMNTQNVTAPVKLFDDAVGVLLNATADYAAANSSRRFGTGEAGFETVDKGYPKIYGLAQCRPDMASADCRSCLANIIRDMPKFFSGKQGGRIIGIQCFYRYEQYPFFFGPSLLQLPAPSLGAAPEPAPANATPPETGGGGTTNSAGRILAIALPIAAAIMAAVMFCLCLWMRKRKPARKQSLAYPTNPEDIQTIDSLILDLSTLRVATDNFDESNKLGEGGFGAVYKGVLAGDEEIAVKRLSQSSRQGIEE…	24276.3	26446.1	24616.8	18816.6	23539	20173.3	25412.9	21560.6	22496.2	22410.8	23353.3	19006	28221.9	23153.7	23433.7	10778.5	10002.2	19017.9	12343.1	13035.4	15193.2	12962.2	13555.1	12970.1	13670.2
Bradi1g25790.1	1.75821e-05	6.74248e-05	0.00802882	0.000210509	1.22528e-05	5.26213e-06	5.26213e-06	0.57457	0.158625	0.57457	0.358482	0.209558	0.158625	MASSLDAPNLDDYLPTDSLPQEPPRSLNLRDLLDISPVLTEAAGAIVDDSFTRCFKSNSPEPWNWNIYLFPLWCFGVVVRYGLLFPLRVLTLGLGWMVFFAAFFPVHFLLKGQNKLRSKIERKLVEMMCSVFVASWTGVIKYHGPRPSSRPYQVFVANHTSMIDFIILEQMTAFAVIMQKHPGWVGFIQKTILESVGCIWFNRNDLKDREVVGRKLRDHVQRPDNNPLLIFPEGTCVNNQYTVMFKKGAFELGCAVCPIAIKYNKIFVDAFWNSKKQSFTMHLGRLMTSWAVVCDVWFLEPQYLREGETSIAFTERVRDMIAARAGLKKVLWDGYLKHNRPSPKHTEEKQRIFAESVLKRLEES	36502.5	44303.8	40237.5	34640.1	38921	16175.6	18280.8	30425.4	24569.5	22362.8	21476.7	20936.3	12975.1	421.746	13952.5	6916.02	6577.5	10875	8256.19	8156.18	13402.2	10458.5	698.427	136.255	6173.85
Bradi1g26690.1	1.46292e-07	1.74704e-06	0.311414	1.11392e-06	5.08007e-07	1.42753e-06	5.08007e-07	0.93365	0.605758	0.93365	0.699942	0.605758	0.702495	MAGKEIYHKMKDKVKDAFSSSGPETGKGKTKLSGKRVKHGYHLVKGKSNHPMEDYLVAEYRQVGEHDLGLFAIFDGHLGHTVPDFLRAHLFDNILKEPEFLSDTKSAIRNAYLLTDEKILERAAELGRGGSTAVTAILISSDDSVKLVVANVGDSRAVISENGKAEQLSVDHEPSMERQTIEEKGGFVSNLPGDVPRVDGQLAVARAFGDRSLKKHLSSEPHVAEIVIDENSDFLILASDGLWKVMTNQEAVDEIKDFKDAQSAAKHLTEQAVNRRSKDDISCIVVKFHC	120397	131774	138761	119193	127531	120949	121767	109936	123626	119069	79843.6	88079.9	90450.9	98683.5	89264.5	83727	73776.9	71691	79817.1	77253	92037.3	84832	84296.2	97194.7	89590
Bradi1g26770.1	2.5615e-05	9.23921e-05	0.00145825	5.41934e-05	1.78624e-05	1.35717e-05	1.35717e-05	0.536817	0.298	0.536817	0.347193	0.321692	0.298	MATPPTLVLLPEWGAGHLMSMLESCKRVLLSGGRAFSITLLVMRPPTAAATSEVEAHVRREAASGLDIRIHRLPAVEPPADAAGVEEFIARYIELHAPGVRDAVAGMSCPVAALVLDLFAAPMVDVAQDLGVPSYVFMSSTGAMLALMLHLPVLHEAVTVEFEEVEGGVVHVPGLPPIPHEWMPCPVVDKKSPNYTWFVRLGERFMDATGIIANTADELEPGPLAAIAEGRAVPGRPAPPVYPIGPVLSLGSSSSKKESSSGPPHACVAWLDAQPRASVVLLCFGSMGWFEAAQVVEICAALERCGAHRFLWVLRGPPGADTGAGAPDGSEHPTDADLDELLPEGFLERTAGRVLVWPTWAPQKEILAHAAVGGFVTHCGWNSVLESLWHGVPMAPWPL…	148529	232813	169738	113957	166259	102957	76454.9	76176.8	101414	89250.7	63820.7	55088.7	48912.6	63074	57724	68125.4	49913.8	45354.3	50543.1	53484.2	50850.5	37499.9	48672.8	61157.9	49545.3
Bradi1g26850.1	0.0179071	0.026172	0.895508	0.750786	0.0250184	0.439647	0.0250184	1.08218	0.631389	1.08218	0.886921	0.631389	0.829017	MASEQVIGKLSVRVVRGSNLIVADPLTHTSDPYVVLCYGSQKVKTSVQKKNANPLWNEVLQLPVTNPTKPVKLEVFDEDKFTADDSMGVAEFNVTDIYDAAKLDLKHASDGTRIKTIYPVGTNYLGGESHVSWKNGKVVQDLILKLKNVDSGSIVLQVEWVHVPGVTL	256519	323994	422756	501499	376192	328980	377392	447804	474249	407106	280002	354636	308943	391031	333653	229595	222784	221018	276697	237524	310840	350052	316653	269933	311870
Bradi1g27332.1	8.33158e-05	0.000246476	0.997421	0.000779095	0.000602172	0.00104942	0.000602172	0.968801	0.356009	0.968801	0.377285	0.356009	0.404282	MGAYKFVSELWRRKQSDVMRFVQRVRCWEYRQQPAIVRITRPTRPDRARRLGFKAKQGYVVYRIRVRRGGRKRPVPKGIVYGKPKHQGITQLKFQRNKRSVAEERAGRRLGGLRVLNSYWVNEDSTYKYFEVILVDVAHNAVRNDPRINWLCKPVHKHRELRGLTSAGKKFRGLRGKGTRHHKNRPSRRATWKRNQTVSLRRYR	7895.31	11624.4	14813.8	13162.2	11873.9	14502.5	14774.1	8982.96	7754.24	11503.5	4907.1	4290.94	3513.72	5207.64	4479.85	4253.22	3678.67	3837.56	5139.45	4227.23	5479.8	3854.14	4875.85	4991.86	4800.41
Bradi1g29300.1	0.000353586	0.000851763	0.678604	0.0165352	0.000151634	0.00533265	0.000151634	0.888613	0.406914	0.888613	0.652915	0.406914	0.592385	MASGPFDSPTSSPAGAAAFHDDPFLSFDGPAASPAAGIDDGFPASPDPYASAAAGAHPFGMPDSNGALHHDDDEGLFSSHNGTGPVLPPPTEMGADEGVLLREWRRQNAILLEKKEEHEKELRSQIILEAEEFKNGFVEKRKLNLETSKDHNRDREKLFLANQEKFHTGADKQYWKAISELIPHEIANIEKRGAKKDKDKKPGIVVVQGPKPGKPTDMARMRQILLKLKHTPPPHMKPPPPPAPAAAAKDGAPAAAGKDGAKAAAPAPANGTVPEMEKAAAAATPAAAAAPAPAAEPIAAA	26396	25129	23886.4	17672.4	23271	25564.5	18216.2	21555.3	17379.5	20678.9	13717.2	13276.2	18639.2	15143.2	15194	6714.52	4946.78	15297.5	10918.3	9469.27	11022.9	13648.3	14957.2	15513	13785.4
Bradi1g29520.1	3.98813e-07	3.68493e-06	0.00100085	6.64711e-06	1.34032e-08	3.17152e-07	1.34032e-08	0.622661	0.242023	0.622661	0.398663	0.242023	0.262308	MADLQEPLVRGKRKKVLVDYLVQFRWILVIFVVLPISSLIYFNIYLGDMWSAMKSEKKRQKEHDDNVQKVVKRLKQRNPKKDGLVCTARKPWIAVGMRNVDYKRARHFEVDLSAFRNILEIDAERMVAKVEPLVNMGQISRATCPLNLSLAVVAELDDLTVGGLINGYGIEGSSHLYGLFSDTVVALEIVLADGKVVRATKDNEYSDLFYGVPWSQGTIGFLVSAEIKLIPIKEYMRLTYTPVKGDLKEIAQGYADSFAPRDGDPSKVPDFVEGMVYNPTEGVMMTGVYASKEEAKKKGNKINSVGWWFKPWFYQHAQTALKKGEFVEYIPTRQYYHRHTRCLYWEGKLILPFGDQFWFRYLFGWLMPPKVSLLKATQGEAIRNYYHDNHVIQDMLVPL…	79346.5	118799	134319	95685.2	107038	73203.3	58172.8	60423.7	74792.7	66648.1	41225.9	43310.7	37398	48753	42671.9	33444.1	26633.2	23446.2	20098.7	25905.5	29753.4	24880.7	27184.1	30489.1	28076.8
Bradi1g29550.1	0.000333445	0.00080757	0.502352	0.00622537	0.979142	0.0852678	0.00622537	1.21612	0.662723	0.882571	0.662723	0.962579	1.21612	MAALPLATAEVCDANSHLITNGELRALQPIFQIYGRRQVFAGPVVTLKVFEDNVLVREFLEEKGQGRVLVVDGGGSLRCAILGGNPVQQAQNNGWAGIVVNGCVRDVDEINGCDIGVRALGSHPMKANKKGVGEKHVPVTVAGTRVCDGEWLYADTDGILISSTELIV	12184	13354	9492.17	12809.3	11959.9	9785.45	10287.1	10233.5	11915.6	10555.4	9655.31	7464.4	6118.22	8466.39	7926.08	9472.33	12833	13602.6	10141.3	11512.3	15223.9	13684.7	13624.6	15645.1	14544.6
Bradi1g30130.1	0.000237879	0.00060206	0.00256197	0.00132158	0.000123831	0.000337315	0.000123831	0.504011	0.315334	0.504011	0.458508	0.315334	0.363682	MRKWALSSALLLVFLLATLSPDPAKRLQVNAEESSDELADLPKVEEKLGAVPHGLSTDSEVVKRESESISRKTLRNSAEKFEFQAEVSRLMDIIINSLYSNKDIFLRELISNASDALDKIRFLGLTDKEVLGEGDTAKLEIQIKLDKENKILSIRDRGVGMTKEDLIKNLGTIAKSGTSAFVEKMQTGGDLNLIGQFGVGFYSVYLVADYVEVVSKHNDDKQYVWESKADGSFAISEDTWNEPLGRGTEIKLHLRDEAKEYLEEDKLKDLVKKYSEFINFPIYLWATKEVDVEVPADEEESSEEESTTETTEEEETEDSEEKKPKTKTVKETTTEWELLNDMKAVWLRNPKEVTEEEYSKFYHSLAKDFGDDKPMSWSHFSAEGDVEFKALLFVPPKAP…	205685	194559	150769	90167.5	160295	64133.7	68453	82646.5	107929	80790.6	76776.3	54810.7	79826.3	82573.6	73496.7	44932.3	38518.6	62118.8	56616.8	50546.6	72889.4	51310	48378.9	60607.8	58296.5
Bradi1g30210.1	9.85059e-06	4.24505e-05	0.00971855	0.000865351	4.88858e-05	1.71059e-05	1.71059e-05	0.743751	0.421604	0.743751	0.656198	0.421604	0.525931	MVKFLKPGKAVILLQGRYAGRKAVIVRVFEEGTRDRPYGHCLVAGLAKYPKKVIRKDSAKKTAKKSRVKCFLKLVNFTHLMPTRYTLDVDLKDVASGGPDALASSDKKVAAAKSAKARLEERFKTGKNRWFFTKLRF	61268.3	84055.3	77908	77910.8	75285.6	42904.4	60106.2	55203.7	65760.6	55993.7	51229.3	56881.5	40946.7	48551.7	49402.3	36094.9	35449.5	31021.9	24396.6	31740.7	34115.8	36965.9	47042.2	40256.1	39595
Bradi1g30550.1	7.99261e-05	0.000239546	0.0125173	0.00431874	4.64782e-05	4.30385e-05	4.30385e-05	0.673826	0.390889	0.673826	0.623239	0.41941	0.390889	MVLSELATQLVVPVAAVVGIAFAVLQWVLVSKVKVTPERRDGEGASSGAAAGAGKNGAAAGSEYLIEEEEGLNDHNVVVKCAEIQTAISEGATSFLFTEYKYAGGFMAIFAVLIFLFLGSIEGFSTKDQACHYSKGKTCKPALANALFSTIAFVLGAITSLVSGFLGMKIATYANARTTLEARKGVGKAFITAFRSGAVMGFLLAASGLFVLYVAINVFGLYYGDDWEGLFEAITGYGLGGSSMALFGRVGGGIYTKAADVGADLVGKVERNIPEDDPRNPAVIADNVGDNVGDIAGMGSDLFGSYAESSCAALVVASISSFGINHEFTPMMYPLLISSVGIIACLITTLFATDFFEVKAVDEIEPALKKQLIISTALMTVGIALVSWLGLPSTFTIFN…	128373	157553	132472	83379.9	125445	109492	78760.5	69284.9	80573.3	84527.8	76744.7	76990.9	70710.7	88281.6	78182	57497.9	65007.5	42435.1	45510.2	52612.7	49227.4	47821.2	50456.2	48634.7	49034.9
Bradi1g31690.1	1.35589e-06	9.6203e-06	0.0520584	0.000118918	5.67501e-07	7.13214e-07	5.67501e-07	0.784234	0.34126	0.784234	0.524518	0.34126	0.346223	MAHGDRMTTFEESERESEYGYVRKVSGPVVVADGMGGAAMYELVRVGHDSLIGEIIRLEGDSATIQVYEETAGLMVNDPVLRTKKPLSVELGPGILGNIFDGIQRPLKTIAIKSGDVYIPRGVSVPALDKDQLWEFQPNKLGVGDAITNGDLYATVFENTLMKHHVALPPGSMGKISYIAPAGQYSLQDTVLELEFQGIKKEFTMLHTWPVRTPRPVSSKLAADTPLLTGQRVLDALFPSVLGGTCAIPGAFGCGKTVISQALSKYSNSDTVVYVGCGERGNEMAEVLMDFPQLTMTLPDGREESVMKRTTLVANTSNMPVAAREASIYTGITIAEYFRDMGYNVSMMADSTSRWAEALREISGRLAEMPADSGYPAYLASRLASFYERAGKVQCLGSP…	4.53179e+06	6.76938e+06	6.86625e+06	5.15847e+06	5.83147e+06	5.14311e+06	4.182e+06	4.22987e+06	4.73797e+06	4.57324e+06	2.96887e+06	2.67706e+06	2.87843e+06	3.71049e+06	3.05871e+06	2.53214e+06	2.5173e+06	1.52877e+06	1.38197e+06	1.99005e+06	2.03398e+06	1.94035e+06	2.0962e+06	2.00544e+06	2.01899e+06
Bradi1g32420.1	0.00633816	0.0105168	0.299329	0.937691	0.00227665	0.210877	0.00227665	0.938035	0.542246	0.819048	0.938035	0.542246	0.795378	MGVEVVVSGGGVVEAAAPAKEMVVSAKEEAAVVAKNPSFREESNLVGDLKESEKKALAELRAKVEAAIVEGKLFEDTSKVKAEEKKVGKKKESKKKAEPVEEKKAETVEEKEEEAAEEKKDEAAEEKKEETEEKKTEEEAEVAKEKKEGEEGEQEPAAVKEEAGDNGEKKEEEAAAVVKDEAADNGEAAAAVVVVDKEISLWGVPLLPSKGDEATDTVLLKFLRARDFKAGAAFEMLRRTLRWRREWRSLAATASDSDEELFPAAACFLDGLDREGHPVCYNDLGALADEAVYRKALGDEAGKARFLRWRVRAMDSHVAELDFRGAGGVTSLLQVTDLKNSPGPAKKDFRVAMKQLLDLFQDNYPELVARNILINVPFSYYAFSTLFYPFLTQRTKSKF…	289076	281583	430673	338566	334974	205914	326143	234084	331300	274360	309186	312270	311668	323747	314218	120745	152189	243313	210306	181638	254188	250104	308826	252606	266431
Bradi1g32490.1	0.00473203	0.00818399	0.025011	0.00154074	0.0140648	0.203681	0.00154074	0.812582	0.563177	0.70291	0.563177	0.674717	0.812582	MAALPLATAEVCDANSHLITNGELRALQPIFQVYGRRQVFAGPIVTLKVFEDNVLVREFLEEKGQGRVLVVDGGGSLRCAILGGNPVQQAQNNGWAGIVVNGCIRDVDEINGCDIGVRALNSHPMKANKKGMGEKHVPVTIAGTRICDGEWLYADTDGILVSRTELIV	20601.6	11755.6	13249.6	13489.8	14774.2	8891.72	10024	12150.3	10473.6	10384.9	8968.57	7249.61	7372.52	9691.17	8320.47	9190.66	10783.8	9772.36	10126.7	9968.38	12122.1	11707.3	13212.6	10978.9	12005.2
Bradi1g32830.1	0.000199345	0.000518145	0.100417	0.000977363	0.000967857	7.45337e-05	7.45337e-05	0.808378	0.513403	0.808378	0.615594	0.619429	0.513403	MSKRKTREPKEENVTLGPAVREGEFVFGVAHIFASFNDTFIHVTDLSGRETLVRITGGMKVKADRDESSPYAAMLASQDVAARCKELGITALHIKLRATGGNKTKTPGPGAQAALRALARSGMKIGRIEDVTPVPTDSTRRKGGRRGRRL	57329.2	58707	82696.6	63799.1	65633	40224.4	52223.6	55748.7	64028.4	53056.3	35253.7	44333.7	36953.8	45072	40403.3	45464.6	41035	38121.2	37999.2	40655	36484.4	28354.8	34643.4	35302	33696.2
Bradi1g34170.2	3.4124e-07	3.26478e-06	0.00353746	7.10564e-08	7.40577e-08	7.83305e-06	7.10564e-08	0.841963	0.620912	0.841963	0.652764	0.620912	0.730409	MLRTMILKCRSCCNQGETEEFFTSYDEVHESFDDMGLQENLLRGIYAYGFEKPSAIQQRGIVPFCKGLDVIQQAQSGTGKTATFCSGILQQLDYGLVECQALVLAPTRELAQQIEKVMRALGDYLGVKVHACVGGTSVREDQRILASGVHVVVGTPGRVFDMLRRQSLRPDHIKMFVLDEADEMLSRGFKDQIYDIFQLLPGKIQVGVFSATMPPEALEITRKFMNKPVRILVKRDELTLEGIKQFYVNVEKEEWKLDTLCDLYETLAITQSVIFVNTRRKVDWLTDKMRGRDHTVSATHGDMDQNTRDIIMREFRSGSSRVLITTDLLARGIDVQQVSLVINYDLPTQPENYLHRIGRSGRFGRKGVAINFVTREDERMLFDIQKFYNVVIEELPANV…	923110	992411	1.10417e+06	1.04313e+06	1.0157e+06	750021	884928	869349	916442	855185	705955	685874	599637	660593	663015	650177	674670	609203	588599	630662	729634	745992	771951	719940	741879
Bradi1g34200.1	5.09947e-06	2.58632e-05	0.000834758	6.47755e-06	9.53011e-06	2.81849e-06	2.81849e-06	0.601247	0.362005	0.601247	0.418174	0.362005	0.384692	MGVYTFVCRSSGGEWTAKQHKGELEASAATTYDLHRQLVAAASAADSSAGVQSSFTAVSPTSAICQVIIGAVGGGAMVGGPAAGGAPASGGAAAEAPKAEEKKEEEKEESEDDLGFSLFD	12372	15187.5	17624.4	12120	14326	7656.95	8058.65	10936.9	7801.29	8613.45	6617.29	4630.92	5347.17	7367.62	5990.75	3183.19	7143.67	5731.24	4686.18	5186.07	5197.77	6403.96	5267.99	5174.64	5511.09
Bradi1g34750.1	5.93646e-05	0.000187548	0.00456557	0.000176882	1.16874e-05	0.000375793	1.16874e-05	0.643148	0.389299	0.643148	0.483091	0.389299	0.52558	MALSGWRRSPAARRPASLCLWIALVAATLVLAQAKKSNADLSTVTHKVYFDIEIEGKPAGRVVMGLFGKAVPKTAENFRALCTGEKGTGKSGKPLHYKGSSFHRIIPSFMIQGGDFTLGDGRGGESIYGTKFADENFKLKHTGPGFLSMANAGRDTNGSQFFITTVTTSWLDGKHVVFGKVLSGMDVIYKVEAEGQQTGTPKSKVVIADSGELPL	111989	160248	132276	103688	127050	59607.8	77715.2	89052.2	100473	81711.9	56134	52120.3	62839	74413.8	61376.8	34551.6	43648.5	57451.3	62190.7	49460.5	66412.2	72567.5	52628	75492.3	66775
Bradi1g35630.1	0.00790856	0.0128229	0.165256	0.976943	0.0140216	0.0119886	0.0119886	0.936214	0.493113	0.696424	0.936214	0.504588	0.493113	MSLDVTQILLSAQSADGAIRKHAEESLKQFQEQNLPGFLFSLSSELASDEKPEESRRLAGLILKNALDAKEEHRKSELFQRWLALDAGVKAQIKALLLQTLSSPVANARSTSSQVIAKVAGIEIPQKQWPELIVSLLSSIHQVQPNVKQATLETLGYLCEEVSPEAVDQDQVNKILTAVVQGMNASEGNSEVRLAATRALYNALGFAQVNFSNDMERDYIMRVVCEATQSPEVKIRQAAFECLVAISSTYYDKLATYMQDIFNITAKAVKGDEESVALQAIEFWSSICDEEIDILDEYSSEFTADSDVPCYYFIKQALPALVPMLLETLLKQEEDQDLDEGAWNLAMAGGTCLGLVARTVGDDIVPLVMPFVEENITKPEWRQREAATYAFGSILEGPS…	54706.7	76875.7	98416.6	102513	83127.9	48040.8	62942.7	50453.3	70132.3	57892.3	57074	66297.1	97948.9	89981.9	77825.5	49648.4	31306.9	55794.4	31031.7	41945.4	21230.4	42000.3	66314.3	34421	40991.5
Bradi1g36700.1	3.22063e-05	0.000114032	0.0323434	5.58237e-05	0.00017335	2.06888e-05	2.06888e-05	0.595816	0.073436	0.595816	0.168433	0.239619	0.073436	MEEVTEAVNNLAITEPHKKNRIQVSNTKKPLFFYVNLAKRYMQVHNEVELSALGMAIATVVTVAEILKNNGLAMEKKIMTSTVDVNDESRSRPMQKAKIEIVLGKTENFDELMAIAAEEREVAAAEEGEEQS	6275.1	10018.5	11823.7	12419.7	10134.3	4690.42	7329.49	5038.31	7094.42	6038.16	2877	1624.59	1164.43	1161.75	1706.94	6848.48	683.756	926.839	1254.39	2428.36	5.66956	626.701	1119.02	1225.49	744.22
Bradi1g36830.1	0.0281445	0.0386235	0.247097	0.0374391	0.0172141	0.0252445	0.0172141	0.552041	0.198569	0.552041	0.294548	0.198569	0.244015	MAAVEMAISKPSTLPGVDDPASSAAKGRAGGGEGLRQYYQQHIHDLQLQIRQKTHNLNRLEAQRNDLNSRVRMLREELQLLQEPGSYVGEVVKVMGKSKVLVKVHPEGKYVVDLDKSIDITKITPSTRVALRNDSYMLHLILPSKVDPLVNLMKVEKVPDSTYDMIGGLDQQIKEIKEVIELPIKHPELFESLGIAQPKGVLLYGPPGTGKTLLARAVAHHTDCTFIRVSGSELVQKYIGEGSRMVRELFVMAREHAPSIIFMDEIDSIGSARMESGTGNGDSEVQRTMLELLNQLDGFEASNKIKVLMATNRIDILDQALLRPGRIDRKIEFPNPNADSRGDILKIHSRKMNLMRGIDLKKIAEKMNGASGAELKAVCTEAGMFALRERRVHVTQEDF…	3918.49	32139.1	14516.9	14495.5	16267.5	4334.08	9946.65	9854.07	11786.5	8980.33	4581.5	3228.91	4512.78	6843.03	4791.56	2366.55	2892.98	1281.53	6379.82	3230.22	6255.64	874.534	4428	4319.86	3969.51
Bradi1g37582.1	9.13019e-07	7.26885e-06	0.800857	0.0002468	3.46189e-06	8.26746e-06	3.46189e-06	0.93452	0.38081	0.93452	0.594686	0.38081	0.450114	MGLVKDGADMEEGTLEIGMEYRTVSGVAGPLVILDKVKGPKYQEIVNIRLGDGTTRRGQVLEVDGEKAVVQVFEGTSGIDNKYTTVQFTGEVLKTPVSLDMLGRIFNGSGKPIDNGPPILPEAYLDISGSSINPSERTYPEEMIQTGISTIDVMNSIARGQKIPLFSAAGLPHNEIAAQICRQAGLVKRLEKGKHAEGGGEDDNFAIVFAAMGVNMETAQFFKRDFEENGSMERVTLFLNLANDPTIERIITPRIALTTAEYLAYECGKHVLVILTDMSSYADALREVSAAREEVPGRRGYPGYMYTDLATIYERAGRIEGRTGSITQIPILTMPNDDITHPTPDLTGYITEGQIYIDRQLHNRQIYPPINVLPSLSRLMKSAIGEGMTRRDHSDVSNQ…	3.65989e+06	5.86729e+06	5.92251e+06	5.45952e+06	5.2273e+06	5.08362e+06	4.62815e+06	4.9301e+06	4.8982e+06	4.88502e+06	2.88941e+06	2.93977e+06	2.9923e+06	3.61293e+06	3.10861e+06	2.53426e+06	2.28343e+06	1.63991e+06	1.50483e+06	1.99061e+06	2.1057e+06	2.33741e+06	2.45386e+06	2.51456e+06	2.35288e+06
Bradi1g38010.1	0.0224208	0.0315388	0.210259	0.00907059	0.0272184	0.0466506	0.00907059	0.798738	0.624523	0.798738	0.624523	0.682019	0.711154	MADSKATSAVTLRTRKFMTNRLLSRKQFVLEVIHPGRANVSKAELKDRLSKVYEVKDPNCIFVFKFRTHFGGGKSSGFGLIYDNLEAAKKFEPKYRLVRNGLATKVEKSRKQIKERKNRTKKIRGVKKTKAGDAKKK	18533.3	25641.9	29725.2	20346.1	23561.6	18509.3	18097	24373.5	14298.5	18819.6	15779.7	14675.7	11903.5	16500.3	14714.8	18406.2	18548.3	10878.3	16445.1	16069.5	16316.6	16075.2	17235.6	17396.3	16755.9
Bradi1g39090.1	4.86713e-06	2.50601e-05	0.000480617	0.00639757	3.87606e-06	6.21966e-07	6.21966e-07	0.747773	0.440576	0.651897	0.747773	0.519555	0.440576	MALHAPVLVLKDSLKRESGAKVHHANIQAAKAVADIIRTTLGPRSMLKMLLDASGGIVVTNDGNAILREIDIAHPAAKSMIELSRTQDEEVGDGTTSVIVLAGEMLHVAEAFIEKNYHPTVICRAYTKALEDALAVLDKIAMPVDVNDRGAMLGLVKSSIGTKFTGQFGDLIADLAIDATTTAGVDLGQGMREVDIKKYIKVEKIPGGQLEDSRVLKGVMFNKDVVAPGKMKRKIVNPRIILLDCPVEYKKGENQTNAELMKEEDWQVLLELEEEYIKNLCAQILKFKPDLVVTEKGLSDLAIHYLSKAGVSAIRRLRKTDNNRIAKACGAVIVNRPEELQESDVGTRAGLFEVKKIGDEFFSFIVDCKDPKACTVLLRGASKDVLNEVERNLQDAMSV…	34228.8	39961.6	45157.3	33489.2	38209.2	17619.6	27139	24556.2	30319.2	24908.5	27710.8	28851	26957.9	30767.6	28571.8	20824.8	19876.3	18524.9	20181.2	19851.8	19234.1	16358.8	15430.5	16312.7	16834.1
Bradi1g39097.1	0.000875282	0.00188619	0.323201	0.00970989	0.0472677	0.000263748	0.000263748	0.877178	0.590439	0.877178	0.735649	0.794833	0.590439	MGNLKECSGRRLDIKTDLGLPRRPELSPKQRKPGKPNRRDRRSEHPDIRLYGFAVDRGDRSGAEVFTELCEVKAREFLVELGLPDGVLPLPSVEEVGYNRATGFVWLRQGQSGGLTHTFDAIGKQVWYATEVTAMVERGRMHSMNGVKSKEMLIWVTISDIVVSPSGTKIVFRTPAGLGRAFPVSAFQLNPPAPEGEAKVSEEDAAAAATTN	58843.3	69078.7	71683.3	65222.1	66206.8	55125	55596.6	61227	60352.2	58075.2	44382	54773	44121.9	51543.2	48705	70334.2	49551.9	42575.4	48032.1	52623.4	42622.5	32544.2	37751.8	43446	39091.1
Bradi1g42000.1	5.11394e-06	2.58632e-05	0.00126624	8.25771e-07	5.34799e-07	4.33711e-05	5.34799e-07	0.535048	0.20661	0.535048	0.20661	0.224664	0.361485	MWRLKVSEGGGPWLRSVNNFLGRAVWEFEPDLGTPEERAEVERVRREFTEHRFQKKESQDLLMRMQYAKQKHPQLDLPAIKLLDSAEVTEEIILTSLRRALSQHSSLQAHDGHWACDYSGILFIMPILVFALHVTGSLNAVLSIEHRREICRYIYNHQNEDGGWGTQVLGPSTMFGSCLNYVTLRLLGELDNTDALTKGRAWILSRGSASAIPQWGKIWLSVIGLYEWSGNNAIVPELWLVPHFLPIHPGRFWCFCRMVYMPMSYLYGKKFVGPITPTIFAIREEIYNVPYHEIDWNKARDTCAKEDLRYPRTLLQNVIWTCLNKCVEPVLNCWPINKLRDAALKNLIKHIHYEDEVTKYIGICPIVKALNMICCWSDDPNSDALKLHLPRIYDYLWLA…	287744	288907	189664	168901	233804	113199	104322	128912	153952	125096	42507.3	31974.2	36098	82645	48306.1	68922.8	32922.4	56479.9	51784.4	52527.4	101983	66062	77763.3	92257.8	84516.5
Bradi1g44460.1	6.93376e-06	3.23655e-05	0.00159979	7.21447e-05	6.59693e-06	1.20015e-06	1.20015e-06	0.56195	0.23667	0.56195	0.405709	0.26972	0.23667	MAAAAVASNGGAANAPAPGRLASVYSEVQTSRLTHMLPLPSVLRSHFTLADGPASSAAGNPDEIAKLFPNLYGQPSASVVPSAEPVPAKPLKIGVVLSGGQAPGGHNVICGIFDYLQERVKGSTMYGFKGGPAGVMKGKYVELTSDFVYPYRNQGGFDMICSGRDKIETPEQFKQAEDTVNRLDLDGLVVIGGDDSNTNACLLGEYFRGRNLKTRVIGCPKTIDGDLKSKEVPTSFGFDTACKIYSEMIGNVMTDARSTGKYYHFVRLMGRAASHITLECALQTHPNVALIGEEVAEKKETLKNVTDYITDIICKRAELGYNYGVILIPEGLIDFIPEVQKLIAELNEILAHDVVDEAGAWKSKLQPESRQLFDFLPKTIQEQLLLERDPHGNVQVAKI…	61529.4	104557	118371	76013.6	90117.8	46896.5	43145.1	51924.7	60600.4	50641.7	33862.6	39280.9	33286.3	39816.7	36561.6	25278.8	27682.3	24757.6	19507.6	24306.6	24718.8	18437.4	26057.7	16098.9	21328.2
Bradi1g44630.1	6.36268e-05	0.000199148	0.0390354	6.74725e-06	0.0378787	0.00158788	6.74725e-06	0.792743	0.476901	0.792743	0.476901	0.791596	0.676647	MADLAAMPNSGEQQGRDAPAPPHLVFVPSAGMGHLLPFTRFIADLANENVEISVVTALPTVSAAEAAHFADLFAAFPRIRRIDFNLLPFDESAFPGADPFLLRWESLRRSAQLLGPLIAAAVPRASAVVTDVTLASQVIPIAKDELNLPCHILFISCATMLSLVAYFPVYLDGAKADHLVGDVDIPGVLRLPVSSPPQVLRNPDSLFTKQFIANGRTIAKSDGILVNTFRALEPEALSALNSGKVVPGFPPVYAVGPLKSSITMTTSTGSSDKDEGAAAGGSPMAWLGEQPAGSVVYVAFGNRHGVSLEQIREIAAGLEASGCGFLWVLKTTVVDREDTAELEDVLGRGFLGRVTGRGLVTKEWVDQEAVLQHPAVGLYLSHAGWNSVTESAAYGVPML…	628740	783026	765275	717420	723615	464210	472283	682119	675953	573641	348573	337020	272298	422480	345093	566215	659308	558673	507048	572811	468590	496544	500112	493282	489632
Bradi1g45487.1	0.00669408	0.0109858	0.996748	0.0918778	0.0128276	0.0724693	0.0128276	1.03955	0.472624	1.03955	0.629353	0.472624	0.609446	MATLTVPSSVPAITDDCEQLRKAFQGWGTNEALIISILGHRDAAQRRAIRRAYAETYGEELLRSITDEISGDFERAVILWTLDPAERDAVLANEGAKKWHPGSPVLVEIACARGSGQLFAVRQAYHERFKRSLEEDVAAHVTGAFRKLLVPLVSSYRYEGPEVNTRLAHSEAKILHEKIEHKAYGDDEIIRILTTRSKAQLLATFNHYNDAFGHPITKDLKADPKDEFLKTLRAVIRCFTCPDRYFEKVIRLAIAGTGTDENSLTRIITTRAEVDLKLIKEAYQKRNSVPLERAVAGDTSGDYESMLLALLGKE	94195.9	122769	169149	190242	144089	107715	129138	202847	159451	149788	69396	76594.3	86681.4	130060	90683	50003.4	59736.9	66782.1	95878	68100.1	102186	92565.7	88716.5	67790.2	87814.6
Bradi1g46670.1	5.58942e-06	2.74187e-05	0.000708037	6.80614e-05	2.63225e-06	9.50023e-06	2.63225e-06	0.534733	0.239755	0.534733	0.423231	0.263052	0.239755	MAAKLTRLHSLRERLGATFSSHPNELIALFSRYVHQGKGMLQRHQLLAEFDALMDGDKEKYAPFEDILRAAQEAIVLPPWVALAIRPRPGVWDYIRVNVSELAVEELTVSEYLAFKEQLVDEHASSNFVLELDFEPFNASFPRPSMSKSIGNGVQFLNRHLSSKLFQDKESLYPLLNFLKAHNHKGTTMMLNDRIQSLRGLQSALRKAEEYLISIPEDTPCSEFNHRFQELGLEKGWGDTAKRVHDTIHLLLDLLEAPDPANLEKFLGTIPMMFNVVILSPHGYFAQSNVLGYPDTGGQVVYILDQVRALENEMLLRIKQQGLDITPKILIVTRLLPDAVGTTCGQRLEKVIGTEHTDILRVPFRTEKGILRKWISRFDVWPFLETYTEDVANELMREM…	65842	92979.5	121466	100149	95109.1	35972.9	69128.6	40620.5	57709.9	50858	45757.5	44605.2	37512.3	33137.4	40253.1	29823.3	19540.3	23610.4	27100.6	25018.7	19983.2	26817.8	23652.9	20757.7	22802.9
Bradi1g46840.2	7.01872e-06	3.25369e-05	0.0167913	0.195475	3.01637e-06	6.64483e-05	3.01637e-06	0.895447	0.592831	0.825691	0.895447	0.592831	0.656899	MVKGRTGQRVRLYVRGTILGFKRSKSNQYESTSLVQIEGLNTKEDVSWYAGKRMAYVYKAKTKSSGTHYRCIWGKVTRPHGNSGVVRAQFKSNLPAESMGRKVRVFMYPSSI	80474.7	71268.3	92961.3	80158	81215.6	67028.5	68014.8	66018.1	67174.5	67059	68336.3	81103.8	71407.2	70049.7	72724.2	52029.9	43008.8	46037.6	51512.3	48147.1	48809.7	45525.6	60816.3	58250.2	53350.5
Bradi1g47767.1	2.3535e-05	8.62736e-05	0.0166445	0.00219849	2.86179e-05	1.1152e-05	1.1152e-05	0.678827	0.292997	0.678827	0.580283	0.368434	0.292997	MAILSALGTEVFIPVAAVIGIVFAVVQWVLVARVKVTPGAAGATGAKNGYGDYLIEEEEGLNDHNVVVKCAEIQTAISEGATSFLFTMYQYVGIFMIIFAVLIFLFLGSIEGFSTKGKPCTYSKDKICKPALYTALFSTASFLLGAITSLVSGFLGMKIATYANARTTLEARKGVGKAFITAFRSGAVMGFLLSSSGLVVLYITINVFKVYYGDDWEGLFESITGYGLGGSSMALFGRVGGGIYTKAADVGADLVGKVERNIPEDDPRNPAVIADNVGDNVGDIAGMGSDLFGSYAESSCAALVVASISSFGINHDFTGMCYPLLVSSVGIIVCLLTTFFATDFFEIKAANEIEPALKKQLIISTALMTVGVAIISWLALPAKFTIFNFGTQKEVANWG…	105593	154867	141567	106511	127135	96905.7	75205.8	84396	88701.8	86302.3	62559.8	64400.5	67054.4	101081	73773.9	71742	59291.7	30040.1	26289.2	46840.7	41465.5	34960.7	34831.3	37742.8	37250.1
Bradi1g47940.2	3.9033e-05	0.0001323	0.546284	0.0402964	3.9679e-05	6.00971e-05	3.9679e-05	0.847436	0.268251	0.847436	0.656126	0.26949	0.268251	MAILYAVVARGTAVLAEHSAAATNAGAVARQVLERLPDGGADSHVSYTQDRYVFHAKRTDGITALCMADDAAGRRIPFAFLEDIHGRFVKTYGRAALTALAYAMNDEFSRVLSQQMDYYSNDPSADRINRMRGEISQVRSVMIDNIDKVLERGDRLDLLVDKTANMQGNTVRFRRQARRYRSSVWWRNVKLTAALILLLLVIIYIALFFVCHGFTLPTCIR	34646.1	80672.6	67807.7	55198.5	59581.2	46242.2	50076	48179.6	57467.2	50491.2	28657.1	39887.4	38792.9	49033.8	39092.8	19298.4	19482.1	13362.4	12083.2	16056.5	9213.72	17310	15177.6	22229.6	15982.7
Bradi1g48010.1	2.48972e-06	1.54776e-05	0.000370161	3.01041e-05	9.99647e-08	1.94167e-05	9.99647e-08	0.528663	0.218399	0.528663	0.382668	0.218399	0.260463	MSSPAPQAAAAAAPMAVDDAEDDQLASMSTEDIVRASRLLDNEIRVLKDEVQRTNLELESLKDKIKENQEKIKLNKQLPYLVGNIVEILEMNPEDEAEEDGANIDLDSQRKGKCVVLKTSTRQTIFLPVVGLVDPDTLKPGDLVGVNKDSYLILDTLPSEYDSRVKAMEVDEKPTEDYNDVGGLEKQIQELVEAIVLPMTHKDRFQKLGIRPPKGVLLYGPPGTGKTLMARACAAQTNATFLKLAGPQLVQMFIGDGAKLVRDAFQLAKEKAPCIIFIDEIDAIGTKRFDSEVSGDREVQRTMLELLNQLDGFSSDERIKVIAATNRADILDPALMRSGRLDRKIEFPHPSEEARARILQIHSRKMNVNPDVNFEELARSTDDFNGAQLKAVCVEAGML…	17538	35900.2	30692.7	27413.7	27886.2	14009.2	15534.8	13610.7	15814.8	14742.4	10162.6	11327.8	11444	9750.15	10671.1	4112.37	7732.21	6226.42	6290.21	6090.3	8940.19	6961.22	5833.51	7318.36	7263.32
Bradi1g50220.1	3.51903e-07	3.34307e-06	0.00138529	9.21914e-08	3.07168e-07	1.40455e-07	9.21914e-08	0.759328	0.477193	0.759328	0.477193	0.558237	0.552192	MALTRIGLAGLAVMGQNLALNIAEKGFPISVYNRTTSKVDETVQRAKIEGNLPLYGFHDPASFVNSIQKPRVVIMLVKAGAPVDQTIATLAAHLEQGDCIIDGGNEWYENTERREKAMEERGLLYLGMGVSGGEEGARHGPSMMPGGSLEAYQYIEDILLKVSAQVPDSGPCVTYIGKGGSGNFVKMVHNGIEYGDMQLIAEAYDVLKSVGKLTNSELQQVFSEWNKGELLSFLVEITADIFGIKDDQGEGYLVDKVLDKTGMKGTGKWTVQQAAELSVAAPTIEASLDSRFLSGLKDERVAASKIFQGDYSTDLPVDKAQLIEDVRKALYASKICSYAQGMNIIKAKSTEKGWGLNLGELARIWKGGCIIRASFLDRIKKAYDRNAELANLLIDPEFA…	512343	671815	639822	609554	608384	441697	394801	503328	508024	461963	305527	289409	269237	297092	290316	404891	344673	310139	298786	339622	327793	351628	347418	316939	335945
Bradi1g50270.1	0.000622828	0.00139105	0.936096	0.382307	0.143812	0.015873	0.015873	1.21917	0.661831	1.05983	1.15626	1.21917	0.661831	MASTLSATSTVGLMATGIASDKKSSSLSSVSSISLASRPRNVRLQRKCNFRVKAAKELYFNKDGSATKKLQAGVNKLADLVGVTLGPKGRNVVLESKYGSPKIVNDGVTVAREVELEDPVENIGAKLVRQAAAKTNDLAGDGTTTSVVLAQGLIAEGVKVIAAGANPVQITRGIEKTAKALVEELKKMSKEVEDSELADVAAVSAGNNYEIGNMIAEAMSKVGRKGVVTLEEGRSSENNLYVVEGMQFDRGYISPYFVTDSEKMTTEYENCKLLLVDKKITNARDLINVLEEAIRGQYPILIIAEDIEQEALATLVVNKLRGSLKICAIKAPGFGERKTQYLDDIAILTGGTVIRDEVGLSLDKADKSVLGTAAKVVLNKESTTIVGDGSTQEEVSKRV…	169340	150917	208048	228065	189093	186046	236009	171401	208172	200407	238858	230602	175141	229957	218639	210891	262662	239913	208680	230536	111569	125932	141932	121157	125147
Bradi1g51357.1	1.84978e-05	7.00944e-05	0.245671	0.00689216	4.26753e-05	1.02586e-05	1.02586e-05	0.855913	0.467743	0.855913	0.706471	0.490013	0.467743	MGISRDSMHKRRATGGKQKAWRKKRKYELGRQPANTKLSSNKTVRRVRVRGGNVKWRALRLDTGNYSWGSEAVTRKTRLLDVVYNSSNNELVRTQTLVKNAIVQVDAAPFKQWYLTHYGVDIGRKKKTPAATKKDATEDGDAAAPAAAAAEEAKKSNNVQRKLEKRQQGRTLDPHIEEQFSSGRLLACISSRPGQCGRADGYILEGKELEFYMKKLQKKKGKGAAA	19547.6	21005.9	21669.2	17780.5	20000.8	16980.2	15987.1	15678.4	19830	17118.9	13140.5	16579.4	10559.3	16240.7	14130	10789.8	13421.7	8561.65	6429.47	9800.66	10679.3	8390.3	9863.65	8487.73	9355.23
Bradi1g51540.1	3.23615e-05	0.000114282	0.0850055	0.000111794	0.214023	0.299783	0.000111794	1.26237	0.119	0.622565	0.119	0.704464	1.26237	MAAVTIQSVKARQIFDSRGNPTVEVDVGLSDGSFARGAVPSGASTGIYEALELRDGGSDYLGKGVLKAVNNVNAIIGPALIGKDPTEQVDIDNFMVQQLDGTSNDWGWCKQKLGANAILAVSLAVCKAGAMVKKIPLYQHIANLAGNKTLVLPVPAFNVINGGSHAGNKLAMQEFMILPTGASSFKEAMKMGVEVYHHLKSIIKKKYGQDATNVGDEGGFAPNIQENKEGLELLKTAIAKAGYTGKVVIGMDVAASEFYSEKDQTYDLNFKEENNDGSHKISGDSLKDMYKSFVSDYPIVSIEDPFDQDDWATYAKMTAEIGQQVQIVGDDLLVTNPTRVSKAINEKTCNALLLKVNQIGSVTESIEAVSMSKRAGWGVMASHRSGETEDTFIADLSVG…	34418.1	24595.2	17538	16439.2	23247.6	16227.3	10021	19849.1	11795.2	14473.1	4183.85	2783.78	1951.22	2146.99	2766.46	18003.2	17006.9	16025.2	14473.1	16377.1	31296.5	20711.3	35045.8	30334.7	29347.1
Bradi1g51650.1	1.95968e-08	3.85871e-07	0.0134963	2.8518e-05	4.81221e-10	1.3152e-09	4.81221e-10	0.840918	0.434781	0.840918	0.679158	0.434781	0.511992	MASELAYAPPMKSGKAGFEGVQEVQHRIRITLSSKSVKNLEKVCSDLVKGAKDKQLRVKGPVRMPTKVLNITTRKSPCGEGTNTWDRFEMRVHKRVIDLVSSPDVVKQITSITIEPGVEVEVTISDQ	234852	270489	264132	224784	248564	198576	206965	209628	220919	209022	162165	172746	158396	181950	168814	137964	116205	89304.9	88810.8	108071	126772	116313	141436	124530	127263
Bradi1g52200.1	0.000903996	0.00192938	0.96602	0.0753348	0.0209259	0.972453	0.0209259	1.26758	0.661193	1.05176	1.26758	0.661193	1.04874	MASPAALLCLAVAFLAGAAMAADPYAFFDWDVSYITASPLGVPQKVIAINKQFPGPIVNVTTNYNVVVNVLNSLDEPLLITWDGIQHRKNCWQDGVLGTNCPIPPGWNWTYNFQVKDQIGSFFYFPPLSLQRAAGGFGGITVNNRAVISVPFDTPDGDIRLFIGDWYKKNHTDLRKMLDDGKELGMPDSVLMNGKGPYRYNDSLVPAGIEYETINVEPGKTYRFRVHNVGVSTSLNLRIQSHNMALVETEGAYTMKQNFTNLDIHVGQSYSFLVSMDQNASSDYYIVASARFVNESIWTRVTGVAILHYSNSKGKASGPLPDPPNDQYDKTFSMNQARSIRMNVSTGAARPNPQGSFHYGQINVSQVYKLRNEPPVTINGKKRTTLSGISYSPPATPLR…	577107	549434	754752	713086	648594	732868	726275	574773	694741	682164	711941	682195	893680	1.00076e+06	822143	372060	417980	470836	454509	428846	803133	618603	675960	623140	680209
Bradi1g52220.1	0.0164396	0.0242637	0.999048	0.752329	0.0163409	0.0699503	0.0163409	0.954655	0.198212	0.954655	0.770732	0.198212	0.381	MASHRHLLRLLDDPFFPFPSPPPSSSCPFLPPSSPFAFPHHDLDIFLPSDPFFAPFPTPTPHAYLLHDLTDRVAALELALAPHPPKPATSRRKYTYATQTPGGRKAKWTAEDNPRSGERALKWEAELACPNPDGFDRKWKWEAKSKPGASSAKTKWAAEIKGKGALEPWSHAYTWEEEEDLSSSDDDEELYYRHRKPEIKDKKKNKDKAAKEDKKEKKNKVGGNVNVRIEEIPEDNTAGCVAIRKAFAMGNGKGKAKELSPQDAALLIQMNYRAHLAHRSQVLRCLRDLAVAKAKLKELRSMFYNLSYRRRISHDHEERQRFSEKIIVLLLTVDALEGPDYMVRTAKKSMLEELEGMLDIVDPQPVGKQRSFSRRKFDLPEGGGAIPAEKTASVNNAVR…	19037.1	87249.3	131342	158948	99144.2	73369.8	118889	83678.5	102656	94648.4	67261.8	113559	92607.8	32225.6	76413.6	17271.8	6470.78	27082.9	27780.6	19651.5	56123.9	35322.9	46382.3	13266.6	37773.9
Bradi1g53680.1	1.44016e-05	5.79934e-05	0.0798159	0.0442816	0.000588377	0.989098	0.000588377	2.17453	0.349205	1.57732	0.349205	2.17453	0.917616	MKPSAAILLGAAIAALLLVSAVRGEGEEDECGSAESAAADRARVRPLKIAAFFSILVSGALGCSLPVLARRVPGLRPDGDVFFLVKAFAAGVILATGFIHILPDAFENLGSPCLPSDGPWKDFPFAGLGAMVGAIGTLVVDTLATGYFTRAHSKKGGGAVVDEEKQAAAAAGEEDVHVHTHATHGHAHGSAALVAAVGGAEDDKMDTIRYRVISQVLELGIVVHSVIIGISLGASQEPDTIKPLVVALSFHQMFEGMGLGGCIVQAKFKARSIVTMILFFCLTTPVGIAVGVGISRVYNENSPTALVVEGGLNSVAAGILVYMALVDLLAEDFMNPKVQSRGKLQLGINLSMLLGAGLMSMLAKWA	47805.7	42730.5	33159.6	56325.1	45005.2	60933.9	52557.2	96058.4	74401.8	70987.8	20190.6	14693.7	13822.6	14157.4	15716.1	62643.8	102504	104960	121353	97865.2	36961	46128.5	39603.7	42496.8	41297.5
Bradi1g53740.1	5.92497e-06	2.85456e-05	0.150774	0.000315342	1.14362e-05	1.58646e-05	1.14362e-05	0.794036	0.256977	0.794036	0.482148	0.256977	0.353278	MAEDAPAAVVPAPVEAPTPVLGEPMDLMTALQLVMKKSSAHDGLVKGLREAAKAIEKHAAHLCVLAEDCDQPDYVKLVKALCSEHNVHLVTVPSAKTLGEWAGLCKIDSEGKARKVVGCSCVVVKDYGEESEGLNIVQEYVKSH	27771.9	39398.8	28360.1	26693.9	30556.2	19917	28598.3	21706.6	26828.8	24262.7	13329	12390	10478.6	22732.8	14732.6	7666.96	9200.94	8238.84	6302.22	7852.24	13298.7	8203.31	10955.3	10722.1	10794.8
Bradi1g54200.1	0.000257486	0.000644431	0.973881	0.0146565	0.0470852	0.0883445	0.0146565	1.42382	0.413335	0.921192	0.413335	0.517231	1.42382	MAAPRLPVLFLLLALLVVACRGEASGEGPRGRKVLVLVDDLAVRSSHSAFFGSLQARGLDLEFRLADDPKLSLHRYGQYLYDGLVLFAPSTPRFGGSVDQNAVLEFIDAGHDMILAADSSASDLIRGIATECGVDFDEDPEAMVIDHINYASTEVEGDHTLIAGDDLIESDVILGSKKIDAPVLFRGIGHAANPSNSLVLKVLSASPSAYSANPKTKLASPPSLTGSAISLVSVMQARNNARVLISGSLDLFSNRFLKSSVKKAGSKLSHEKAGNEQFVTETSKWVFHERGHLKAVNVKHHKIGETNEPSMYRINDDLEYSVEIYEWSGTSWKPYVADDVQVQFYMMSPYVLKNMSTDKKGVYSSSFKVPDVYGVFQFKVEYQKLGYTGLSLAKQIPVR…	28989.1	44459.6	22181.1	24203.4	29958.3	25077.5	24686.1	32178.7	28447.1	27597.3	12926.1	9860.87	13239.5	13504.8	12382.8	11382.9	19736	16395.7	14466.8	15495.4	28133.4	47918.8	56102.9	38465.2	42655.1
Bradi1g54270.2	7.56803e-06	3.44908e-05	0.0315163	0.000468165	3.23971e-06	7.70862e-06	3.23971e-06	0.735578	0.324836	0.735578	0.544024	0.324836	0.360243	MADRGGERGGDRGGFGRGFGRGDRGGRGDRGRGGRGGRGGRRGGRQEEEKWVPVTKLGRLVREGKFQKIEQIYLHSLPVKEHQIVDTLCPGLKDEVMKITPVQKQTRAGQRTRFKAFVVVGDSNGHVGLGVKCAKEVATAIRGAIILAKLSVVPVRRGYWGNKIGQPHTVPCKVTGKCGSVTVRMVPAPRGSGIVAARVPKKVLQFAGIDDVFTSSRGSTKTLGNFVKATFDCLMKTYGFLTPDFWTETRFVKAPYQEYTDLLAAKPAKLMIEAPVDLPEA	58114.9	81769.2	99365.8	84348.5	80899.6	47691.6	65763.2	57515.2	67061.8	59508	47016.4	51021.1	29696	48311.7	44011.3	30607.5	32347.5	23725.3	18436.2	26279.1	30370.8	31293.3	31300.5	23609.4	29143.5
Bradi1g54510.1	0.0231864	0.0324465	0.23511	0.22658	0.0252643	0.00877035	0.00877035	0.571831	0.165724	0.571831	0.566311	0.288817	0.165724	MAQPLVVKKDDDCDEEEYYSPFLGIEKGAVLQEARVFHDPQLDARRCCQVITKLLYLLNQGDTFTKVEATEVFFATTKLFQSKDAGLRRMVYLMIKELSPSADEVIIVTSSLMKDMNSKTDMYRANAIRVLCRIIDSTLLTQIERYLKQAIVDKNPVVASAALVSGIYLLQTSPEIVKRWSNEVQEAVQSRAALVQFHALALLHQIRQNDRLAVSKLVTSLTRGSVRSPLAQCLLIRYTSQVIRESGMNTQGGDRPFFDFLESCLRNKAEMVILEAARAITDLNGVTSRELTPAITVLQLFLSSSKPVLRFAAVRTLNKVASTHPLAVTNCNIDMESLISDQNRSIATLAITTLLKTGNESSVDRLMKQMTNFMSDIADEFKIVVVEAIRSLCLKFPLK…	6851.18	26863.1	47046.2	27795.1	27138.9	12315.8	17230.5	12704.1	19824.9	15518.9	21523	13841	21831.8	4280.37	15369	11468.5	331.806	12686.7	6865.64	7838.16	6049.75	8107.84	1298.86	2533.77	4497.56
Bradi1g55280.1	0.000175861	0.000465171	0.303503	0.00121545	0.00015775	0.000750108	0.00015775	0.806572	0.351127	0.806572	0.477641	0.351127	0.446636	MADVEVDPEVATGAQPAKKRTFRKFSYRGVDLDALLDMNTDDLVQMFPARARRRFKRGLKRKPMALVKKLRKAKKDAPAGEKPEPVRTHLRNMIIMPEMIGSIVGVYNGKTFNQVEIKPEMIGHYLAEFSISYKPVKHGRPGIGATHSSRFIPLK	9797.77	14655	9597.8	7484.82	10383.8	7474.9	7461.62	10226.7	8338.03	8375.31	5711.77	6088.75	3654.47	4384	4959.75	3879.7	4722.8	2664.19	3317.5	3646.05	4857.62	3191.99	4727.1	5774.46	4637.79
Bradi1g55510.1	1.3118e-06	9.51408e-06	0.235326	0.00052938	3.3389e-06	1.43371e-06	1.43371e-06	0.831698	0.260226	0.831698	0.542723	0.260226	0.285672	MAPSTRPLVSVKALEGDMATDAVNLALAEVFRAPLRPDIVRFVHRLLSCNKRQPYAVSRRAGHQTSAESWGTGRAVSRIPRVPGGGTHRAGQGAFGNMCRGGRMFAPTKIWRKWHRRVNVHLRRVAVSSALAATAVPALVLARGHRIETVPEMPLVISDSAESIEKTSQAIKILKQIGAYADAEKAKDSVGIRAGKGKMRNRRYVKRKGPLIVYGTEGSKIVKAFRNLPGVDVANVERLNLLDLAPGGHLGRFVIWTESAFKKLEEVYGTFDAPSLKKKGFVLPRPKMANADLGRIINSDEVQSVVKPINKEVKLREKRRNPLKNAAAVLKLNPYFGTARKMATLAEAARVKARKEKIASKRTKLSPEEAAKVKAAGKAWYKTMISDSDYTEFDVFSKW…	132673	206140	238069	212469	197338	132477	187098	157776	179150	164125	120257	120834	102302	85004.6	107100	44796.5	43850.3	58507.5	58255.1	51352.4	64811.5	69859	38239.8	52585.1	56373.9
Bradi1g55770.1	2.12551e-09	7.54557e-08	0.00952082	3.36917e-08	1.9444e-11	1.00746e-09	1.9444e-11	0.818122	0.266909	0.818122	0.538538	0.266909	0.432125	MAARALLAVAMALAVVSVASAQSSSSGCTQTLIGMSPCLGYITGNSTKPSSSCCSQLASVVKSQPECLCVALNADPAALGLGSINKTRAVGLPDECSVKTPPLSNCNSGAAPTTSPSAGTPAGQTPTSAGAGSKTTPTTDIGSGVAPSLRGVAGIIAGLVVAAVSVM	42251.6	39995.7	50100	48361.8	45177.3	38314.3	34766.9	37857.1	36903.7	36960.5	27796	21287.4	22294.9	25940.4	24329.7	15078.3	7883.33	14745.1	10526.1	12058.2	22328.2	17505	17461	20794.6	19522.2
Bradi1g56270.1	2.50193e-05	9.04853e-05	0.82895	0.998394	9.30369e-05	0.00551035	9.30369e-05	1.07209	0.491101	1.07209	0.981168	0.491101	0.661853	MASLGRVALLPVVVVAMAAAAAMVEGLGVNWGTQASHPLPAKVVVQLLRDNGIKKVKLFETNLDAMSALAGSGIEVMAAIPNNMLHDMAADPKAARDWVKRNVKRFDFDGGVIIKYVAVGNEPFLEAYNGSFIKATLPALENIQNALNDAGAGDRIKATVPLNADVYNSPAKNPVPSAGRFRSDISGVMTDIVKFLAKNKAPFTVNIYPFLSLYLSDDFPLDFAFFDDGGPPVHDGGNGVTYTNVFDANFDTLVAALRAAGHGDMPVIVGEVGWPTDGDRRATAALAERFYGGLLKRLATTHGSPARPGQRIEAVYLFGLVDEDRKSVAPGSFERHWGIFRYDGQPKYGMDLAGQGRRANARLVPAKGVEYLSRTWCALNPKAGDLGKLGEKIDYACSN…	223376	286149	377332	412868	324931	348269	328158	362814	354179	348355	311878	329427	314729	319214	318812	165260	147122	156810	169104	159574	238150	191309	223556	207211	215057
Bradi1g56910.1	1.60268e-05	6.30327e-05	0.036971	2.89301e-05	0.000105712	1.19989e-05	1.19989e-05	0.614654	0.063042	0.614654	0.13849	0.207743	0.063042	MASSADPATEPYVVEDCRGVLQLLSDGTVVRSAALPFPAGNDDGLDNDGRVEWKDAVYDAGRGLGLRMYKPAAAEKKLPVLVYFHGGGFCIGSYAWPNFHAGCLRLAASLPAVVLSFDYRLAPEHRIPAAHEDAAAALLWLRSQLASDTSNPWLADAADPRRVFVSGESAGGNLAHHLALRFGASGLDPVAHIAGYILLMPAFMSEQPTRSELDSPATAFLTRDMCDRYGRLSFPAGANRDHPLLNPLGPESPSLDPLLDVAMLVVAAEGDLLRDKNVEYAERLKALAAEKGKGKEENVELVVFQGEEHAFFGVKPMSEAAGELVRVIGRFVARSGSGTGGGQMS	11696.4	18688.3	11394.5	8715.13	12623.6	5852.33	4713.56	9966.27	10504.4	7759.14	1052.46	2586.31	1873.25	1480.98	1748.25	2771.62	2159.52	2797.66	2761.07	2622.47	683.126	2463.92	0	36.2205	795.817
Bradi1g57760.1	0.0186058	0.0269884	0.655964	0.460549	0.0120957	0.0253824	0.0120957	0.813496	0.409667	0.813496	0.761499	0.409667	0.47334	MPSLLILSLLLSTAVLNLAALATGEDEFVFTGFKGANITIDGVATVTSNGLLDLTNAHERLKGHAFYPAPLRFRESPNGTVKSFSVSFVLAIYPNYRPSQGMTFFIAKSMDFSSALPVQYFGVFNSVNQGNSSNHIFAVEFDTVVNMDLRDIDANHVGVNINSAISKKSSTAGLYDDRTGSFSTLNLTGGEGLRVWVDYERESTRINVTISPVSMAAKPARPLISAIYNLSTVITEDAYLGFGSAAGKDGSRHYILGWSFGMNSPAPSIDISKLPRLPRLSPKPRSKVLEIVLPVATAAFVLVLGIIIFLFVRRHRRYAELKEDWEVEFGPHRFPYKDLYYATQGFKNKNLLGVGGFGRVYKGVLPKSKLEIAVKRVSHESKQGMKEFIAEVVSIGRLQ…	24919.8	12240.3	13146.2	16847.4	16788.4	19310.8	17316	4455.6	13546.9	13657.3	13539.3	12513.9	11795.4	13288.9	12784.4	9319.2	5168.08	6251.96	6771.44	6877.67	6641.11	6871.65	9050.12	9223.69	7946.64
Bradi1g59110.1	1.24595e-05	5.1403e-05	0.00367531	0.000116499	3.46261e-06	1.20177e-05	3.46261e-06	0.69965	0.458182	0.69965	0.534435	0.458182	0.483636	MSDSEEHHFESKADSGASKTYPQQAGTIRKSGHIVIKGRPCKVVEVSTSKTGKHGHAKCHFVAIDIFNGKKLEDIVPSSHNCDIPHVDRQDYQLIDITDDGFVSLLTENGGTKDDLKLPTDDALLTQIKDGFDAGKDLILSVMSAMGEEQICAVKEIGGGK	52605.2	44148.5	41276.7	31215	42311.3	25338.1	28027.3	31731.7	33315.4	29603.1	22836.9	22702.5	19908.5	25002.8	22612.7	19186.7	19373.1	21216.7	17768.6	19386.3	22023.8	18868.1	20765.8	20195.5	20463.3
Bradi1g59220.1	0.00134122	0.00272486	0.608612	0.408424	0.516475	0.00316448	0.00316448	1.13093	0.537766	1.13093	0.832672	0.853069	0.537766	MMGRKALDYEELNENVKKVQYAVRGELYLRASELQKEGKRIIFTNVGNPHALGQKPLTFPRQVVALCQAPFLLDDPNVGLIFPADAIARAKHYLSMAPGGLGAYSDSRGIPGVRKEVAEFIQRRDGYPSDPELIYLTDGASKGVMQMLNAIIRNERDGILVPVPQYPLYSAAISLFGGSLVPYYLEEEANWGLDIVTTRQSVAAARSKGMTVRAMVIINPGNPTGQCLSEANIRELLNFCYQENLVLLADEVYQQNIYQDERPFISARKVLFDMGPPISREVQLISFHTVSKGYWGECGQRGGYFEMTNIPPKTVDEIYKVASIALSPNVPGQIFMGLMMNPPKPGDISYLKFATESKSILDSLRRRAQIMTDGFNSCQNVVCNFTEGAMYSFPQIRLP…	79980.6	94978	96347.7	116861	97041.9	120230	136040	91995.7	90723.1	109747	82862.3	91625.1	71057.7	77671.2	80804.1	98122.2	100635	64532.1	67844.4	82783.5	55722.3	49037.3	46621.3	57362.7	52185.9
Bradi1g59280.1	0.00116351	0.00240733	0.240173	0.00651446	0.000811954	0.802666	0.000811954	0.911948	0.508035	0.811927	0.617122	0.508035	0.911948	MVSGSGISARRVVVDARHHMLGRLASIVAKELLNGQRVVVVRCEEISVSGGLVRQKMKYLRFLRKRMNTKPSHGPIHFRAPSRIFWRTVRGMIPHKTPRGEAALARLKAYEGVPPPFDRTKRMVIPDALKVLRLQAGHKYCQLGELSKEVGWNYQDTIRELEEKRKEKAKVSYDRRKQLAKLRVKAEKAAEEKLGSQLDILAPIKY	76582.9	97022.4	109449	90788.6	93460.8	69958.3	70682.3	84317	78575.8	75883.4	52182.8	59242.9	54065.4	65215.5	57676.7	42334.8	46082.2	46902.4	54606.2	47481.4	52108.6	92936.7	84347	111533	85231.4
Bradi1g59380.1	0.000829113	0.00179819	0.903072	1	0.00147778	0.393458	0.00147778	1.05502	0.631685	1.05502	0.997866	0.631685	0.87586	MASPAGVLLLAATLLLTTAAMLASAADSSTTTHLHFFLHDMVSGSNPTAVQIIKGPASTSASAFPGIAFGDTTVVDDALTETSSPSSAAVGRAQGYYMMSSQSGPVLMMCVNLLFTTGAYNGSTLAVLGRDDILETTRELPVVGGTGKFRMASGYVLWKTSNSSGPDATIELDVYVAMANGTGTIDASAPVSPIDGGGGAGGGAAGKSASGAAAAAAYGRWVSAFVVAVLVAMVGGVW	316768	300800	422169	420586	365081	386094	356544	419802	378239	385170	385401	373592	326968	371247	364302	233691	292890	190208	205676	230616	356167	345622	287274	289977	319760
Bradi1g59420.1	4.39112e-07	3.97253e-06	5.35733e-05	1.79792e-09	5.56739e-06	0.000347047	1.79792e-09	0.635486	0.250697	0.560275	0.250697	0.494015	0.635486	MGRKWSMFAGGLTFLVGAALNGAAENIAMLIIGRILLGVGVGFANQSVPVYLSEMAPARLRGMLNIGFQLMITIGILAAALINYGTNKIKSGYGWRVSLALAAVPAGIITLGSLFLPDTPNSLIERGHPESARAMLARIRGADVDISAEYGDLVVASEESKLVTHPWRNILERRYRAQLTMAIAIPFFQQLTGINVIMFYAPVLFETLGFKGDGALMSAVITGLVNVFATLVSVFTVDRLGRRKLFLQGGSQMLLSQLVVGTLIAVRFGTSGVGEMPKGYAAAVVLFICVYVAGFAWSWGPLGWLVPSEIFPLEIRPAGQSINVSVNMLFTFVIAQAFLTMLCHLKFGLFYFFAGWVVIMTVFIALFLPETKNVPIEEMVLVWKGHWFWKRFIADEDVH…	41611.3	33128.1	30686.1	39159.9	36146.3	19908.9	19070	20923	21105.7	20251.9	10259.1	11358.7	7700.69	6928.58	9061.77	19941.3	18160	19076.8	14249.2	17856.8	20158.2	22034	30270	19419.9	22970.5
Bradi1g60110.1	0.000448548	0.00104326	0.173578	0.000199472	0.114066	0.00121959	0.000199472	0.752119	0.327544	0.752119	0.327544	0.722699	0.440905	MAPAATSSWAAFLLWFCVAATAAWAHGGGGDDGDADGGGGGDKADLRAPGLVATKLWCLAVVFLGTLAGGVSPYFMRWNEAFLALGTQFAGGVFLGTAMMHFLSDANETFGDLVKDSAYPFAFMLACAGYVVTMLAECVISSVVARGRTTPDGAAAGSTSAGVLEEGKLGTTNGNSSEPQAADAHGSSTDHSVPSMLGNASTLGDSILLIAALCFHSVFEGIAIGVAETKADAWKALWTISLHKIFAAIAMGIALLRMLPNRPLLSCFAYAFAFAISSPIGVGIGIVIDATTQGRVADWIFAISMGLATGIFIYVSINHLISKGYKPQRPVAADTPVGRWLTVVLGVGVIAVVMIWDT	73445.7	40868.5	50379	55959.9	55163.2	32763.2	30824.5	56655.9	45713.6	41489.3	21437.6	15425.6	18578.3	16832.1	18068.4	38489.5	30691.7	52433	37851.5	39866.4	30234.4	20998.7	26969.2	19084.8	24321.8
Bradi1g60310.1	2.22578e-06	1.43664e-05	0.0135969	6.45029e-05	6.20389e-07	8.43679e-07	6.20389e-07	0.614363	0.0644728	0.614363	0.304626	0.0644728	0.089219	MAAAAAGGAPRALSQREQDIQMMLAADVHLGTKNCDFQMERYVFKRRSDGIYIINLGKTWEKLQLAARVIVAIENPQDIIVQSARPYGQRAVLKFAQHTGANAIAGRHTPGTFTNQLQTSFSEPRLLILTDPRTDHQPIKESALGNIPTIAFCDTDSPMRYVDIGIPANNKGKQSIGCLYWLLARMVLQMRGTILPGHKWDVMVDLFFYRDPEEAKEQDEEEALVAPEYGAPPVDNWGDLPALSAAPTGAEWGSAVPAPVAGEGWEAPSVPLPADASVPAPGPAPATGWEEGSAPAATGWQ	9135.75	9320.81	8232.72	4259.57	7737.21	4353.89	3599.42	5904.48	5156.02	4753.45	2586.5	3268.2	1465.94	2107.19	2356.96	1158.16	216.021	621.181	0	498.839	460.863	0	1162.94	1137.43	690.306
Bradi1g60320.1	2.9875e-05	0.000106617	0.000573878	0.00207866	1.64354e-05	4.50459e-05	1.64354e-05	0.423468	0.0945974	0.333325	0.423468	0.0945974	0.10862	MGEAAGDRVLSRLQSVRERIGDSLSAHPNELVAVFTRLVNLGKGMLQPHQIISEYNTAIPEAAREKLKDGAFEDVLRAAQEAIVISPWVALAIRPRPGVWEYIRVNVSELAVEELSVPEYLQFKEQLVEGSNKDFVLELDFEPFNASFPRPSLSKSIGNGVQFLNRHLSSKLFHDKESMYPLLNFLRAHNYKGMTMMMNDRIRSLSALQGALRKAEEHLSGLPADTPYSDFHHRFQELGLEKGWGDCAKRAQETLHLLLDLLEAPDPSTLEKFLGTIPMVFNVVILSPHGYFAQANVLGYPDTGGQVVYILDQVRAMESEMLLRIKQQGLDITPRILIVTRLLPDATGTTCGQRLEKVLGTEHTHILRVPFRTENGIVRKWISRFEVWPYLETFTDDVA…	18668.6	30032	50014.1	31474	32547.2	10586.3	13406.6	8675.67	10726.6	10848.8	11601.5	12504.1	15049.5	15975.6	13782.7	5060.67	801.902	4613.83	1839.11	3078.88	2687.33	4311.86	4852.23	2289.62	3535.26
Bradi1g60730.1	2.70961e-09	8.83485e-08	5.114e-05	5.06832e-08	1.09901e-12	3.63487e-12	1.09901e-12	0.636204	0.184427	0.636204	0.45567	0.184427	0.25389	MKFNIANPTTGCQKKLEIDDDQKLRVFFDKRISQEVLGDHLGEEFKGYVFKIMGGCDKQGFPMKQGVLSSGRVRLLLHRGTPCFRGYGRRDGERRRKSVRGCIVSQDLSVINLVIVKKGDNDLPGLTDTEKPRMRGPKRASKIRKLFNLAKDDDVRKYVNTYRRTFTNKNGKKVSKAPKIQRLVTPLTLQRKRARIAKKKQRIVKKKSEAAEYQKLLAQRLKEQRDRRSESLAKKRSRLSTAKAAPAATA	175440	238969	220224	190154	206197	124328	150778	114405	135222	131183	100917	96982.7	77413.2	100518	93957.8	48096.7	47557.7	37773.4	18685.2	38028.3	50726.2	46841.6	59134.1	52703.2	52351.3
Bradi1g63010.1	0.00035353	0.000851763	0.999996	0.00315803	0.00851911	0.0020268	0.0020268	1.00745	0.31397	1.00745	0.35731	0.436351	0.31397	MVSLKVQKRLASSVLKCGKGKVWLDPNEVNEISMANSRQNIRKLVKDGFIIKKPQKIHSRSRARRAHEAKQKGRHSGYGKRRGTREARLPTKILWMRRMRVLRRLLRKYREAKKIDKHMYHDMYLKVKGNMFKNKRVLMESIHKSKAEKAREKTLSDQFEAKRAKSKASRERKIARREERLAQGPREHVAPAAAAPAQTAVAPKKAKK	9499.79	15092.1	23448.1	16105.2	16036.3	20723	20074	11875.1	11950.7	16155.7	6738.13	5692.61	4189.56	6299.41	5729.93	9072.32	5029.57	7754.42	6133.52	6997.46	4770.17	3767.16	5611.43	5990.91	5034.92
Bradi1g63310.1	4.70334e-05	0.000154	0.0568176	3.60496e-05	0.000222433	0.444624	3.60496e-05	0.871636	0.416315	0.759931	0.416315	0.513117	0.871636	MADEEQMEKKEEQTEITPFDPTKKKKKKKVVIQDPSDEVDKLAEKTESLAVTESGEPSFTGLKKKKKKHVELDPSLIEAGDGEDTLDDQIGEDEQGEGIVLGGATQYPWEGTDRDYTYEELLGRVFNILRENNPDLAGDRRRTVMRPPQVLREGTKKTVFVNFMDLCKTMHRQPEHVMTFLLAEMGTSGSLDGQQRLVIKGRFAPKNFEAILRRYINEYVICNGCKSPDTILSKENRLFFLRCEQCGSSRSVAPIKTGFVAQVGRRKAGA	5327.32	5046.3	4016.05	4319.25	4677.23	3054.67	3761.7	3454.3	3946.8	3554.37	2156.18	1681	1663.95	2287.66	1947.2	3486.77	2040.53	1893.06	2179.51	2399.97	3194.43	3798.17	5049.72	4265.03	4076.84
Bradi1g63550.1	0.0251196	0.0349344	0.111932	0.190075	0.626298	0.00719871	0.00719871	0.877802	0.601088	0.753405	0.786353	0.877802	0.601088	MRPRAVFLLAALVLSVCLRVSHAVTNSQDTSVLRALMDQWQDAPPTWGQSDDPCGDSPWEGVTCSNDRVIFIKVSTMGIKGVLAADIGQLSELQSLDLSFNHDLGGVLTPTIGNLKQLTTLILAGCSFHGNIPDELGSVPKLSYMALNSNRFSGNIPASLGNLSDLYWFDIADNLLTGPLPISSNGGMGLDKLTKTKHFHFNKNQLSGPIPDALFSPEMTLIHLLFDGNKFTGNIPDSLGFVSTLEVVRLDRNSLSGSAPANLNNLTKVNELNLANNQLTGPLPDLSGMAVLNYVDLSNNTFDPSPSPQWFWKLPQLSALIIQSGRLYGTVPMRLFSSPQLQQVILDGNAFNGTLDLGRSISSELSIVSFKDNDFSSVTLTSSYNGTLALAGNPVCDHL…	425299	295334	292633	245826	314773	313161	222566	196453	216426	237152	225779	198692	294229	271391	247523	263501	253077	317355	271301	276309	192455	171664	192150	200556	189206
Bradi1g65150.1	0.00286137	0.00530948	0.517968	0.00460755	0.00340915	0.0110558	0.00340915	0.859916	0.561115	0.859916	0.578268	0.561115	0.622948	MYTARKKIQKDKGVEPSEFEDSVAQAFFDLENNNQDLKSELKDLYINTAIQMDVVGNRKAVVIHVPYRLRKAFRKSHVKLVRELEKKFSGKDVVFIATRRIVRPPKKGSAVQRPRTRTLTAVHDGILEDVVYPAEIVGKRVRYRLDGSKIIKIFLDPKERNNTEYKLETFTAVYRRLCGKEVVFEYPVTETA	59556.6	98157	109150	99317.5	91545.2	56700.1	80684.5	78638.7	98861.7	78721.2	51631.3	56633	52525	50961.6	52937.7	46758.3	45366	51459.6	61885.8	51367.4	45205.2	71670.5	51636.2	59599.9	57027.9
Bradi1g65810.1	0.000176823	0.0004668	0.0593252	0.000292314	0.0016011	9.51924e-05	9.51924e-05	0.784298	0.511308	0.784298	0.566739	0.636935	0.511308	MDGAPVAEFRPTMTHGGRFLLYNIFGNQFEITAKYQPPIMPIGRGAYGIVCSVMNFETREMVAIKKIANAFDNNMDAKRTLREIKLLRHLDHENIVGLRDVIPPAIPQSFNDVYIATELMDTDLHHIIRSNQELSEEHCQYFLYQLLRGLKYIHSANVIHRDLKPSNLLLNANCDLKICDFGLARPSSESDMMTEYVVTRWYRAPELLLNSTDYSAAIDVWSVGCIFMELINRAPLFPGRDHMHQMRLITEVIGTPTDDDLGFIRNEDARRYMRHLPQFPRRPFPAQFPRVQPAALDLIERMLAFNPLQRITVEEALEHPYLERLHDIADEPICTDPFSFDFEQHPLTEDQMKQLIFNEALELNPNFRY	24498.8	26426.7	26242.4	19386.9	24138.7	20563.7	15972.3	24019.6	15172.2	18931.9	13564.5	13477.3	15312.1	12367.6	13680.3	18837.8	12567.4	15457.4	14636.6	15374.8	12445.7	10026.3	12916.6	13980.6	12342.3
Bradi1g65820.2	6.17578e-06	2.9543e-05	0.0400447	0.00018632	0.0347247	0.0898468	0.00018632	1.21907	0.565943	1.21907	0.565943	0.775425	0.813987	MAKTYPTVSAEYQEAVEKARRKLRALIAEKSCAPLMLRLAWHSAGTFDVSSKTGGPFGTMKKPAEQAHAANAGLDIAVRMLEPIKEEIPTISYADLYQLAGVVAVEVSGGPEIPFHPGREDKPQPPPEGRLPDATKGSDHLRQVFGKQMGLSDQDIVALSGGHTLGRCHKERSGFEGPWTREPLKFDNTYFTELLSGDKEGLLQLPSDKTLLSDPVFRPLVEKYAADEKAFFEDYKEAHLRLSELGYAEA	254209	295323	264731	178353	248154	283369	292805	312261	321633	302517	129403	126894	147102	158365	140441	217222	172548	198837	181092	192425	200229	179595	213744	214408	201994
Bradi1g66030.1	0.00311522	0.00570208	0.9834	0.0137826	0.00470342	0.0428716	0.00470342	0.961225	0.612989	0.961225	0.668565	0.612989	0.725322	MNSLAFLCRPSPLTPSASPSISLSVPQSSCIKLPRSRPAAHRHRTAAAARISSRTVAMATAAAPPVIFPKENLPPSLTSTSEPPPLFDGTTRLYVAYHCPYAQRAWITRNCKGLQDKIKIVAIDLADRPVWYKEKVYPENKVPSLEHDNQVKGESLDLVKYIDSNFEGPALLPEDSAKKQSAEELLAYTDEFNKALYSSILSKGDVSEETVAALDKIEAALGKFTDGPFLLGQFSSVDIAYLPFIERFQIFYSGIKNYDITKGRPNFQKYIEEANKIDAYTQTKLEPQFLLDQTKKRLGIE	750391	773742	709919	555464	697379	860562	704536	587899	528356	670338	422916	458247	438414	545396	466243	526164	436938	375612	371230	427486	421944	454147	537929	609277	505824
Bradi1g66440.1	1.33949e-05	5.45914e-05	0.00233089	6.65133e-07	0.0130161	3.72808e-05	6.65133e-07	0.765949	0.457719	0.702702	0.457719	0.765949	0.57047	MAQKEANGNGATTRPPPTPSPLRFSKFFQANMRILVTGGAGFIGSHLVDKLMENEKNEVIVADNFFTGSKDNLKKWIGHPRFELIRHDVTEPLLLEVDQIYHLACPASPIFYKHNPVKTIKTNVIGTLNMLGLAKRVGARILLTSTSEVYGDPLEHPQTEAYWGNVNPIGVRSCYDEGKRVAETLMFDYHRQHGIEIRIARIFNTYGPRMNIDDGRVVSNFIAQAIRGEALTVQKPGTQTRSFCYVADMVNGLMKLMNGDNTGPINIGNPGEFTMLELAENVKELINPEVTVTMTENTPDDPRQRKPDITKAKEVLDWEPKVVLRDGLVLMEDDFRERLAVPKKSKA	208176	299812	308733	309086	281452	162339	213251	208941	206576	197777	117042	141362	114768	142132	128826	244534	194311	221446	202020	215578	154728	168429	159465	159617	160560
Bradi1g66687.1	0.00238163	0.00451238	0.104314	0.00486231	0.000766526	0.168088	0.000766526	0.769178	0.46087	0.73862	0.56099	0.46087	0.769178	MGSKDQDLAASSGGGGGFFSSIAAGVRSWGTAVHKSVNGMVGYEGLEVINPDGGTEDAEAEAMRGRWKQEDRDSYWKMMSKYIGSDVTSLVTLPVIIFEPMTMLQKMAELMEYCELLDKADECEDPYMRLVYASIWAVSVYPAYQRMWKPFNPILGETYEMVNHQGITFIAEQVSHHPPMGVAHCENDHFTYDITSKLKTKFLGNSVEVYPVGRTRVTLKKSGVVLELIPPLTKVNNLIFGRTWVDSPGEMIMNNLTTGDKVVLYFQPCGWFGAGRYEVDGYVYSAAEEPKMMVTGKWNKFMSYQPCDQEGEPLPGTELKEIWRVAPTPPSDKYQYTYFAHKINSFDTAPKKLLPSDSRLRPDRYALEKGDMSKSGAHKSRLEEQQRAEKRTRDTKGEQ…	4064.42	3884.23	3431.13	2559.45	3484.81	2258.57	1950.56	3382.6	2704.07	2573.95	1574.73	2115.72	1378.49	2750.82	1954.94	2031.46	1096.51	1540.02	1756.19	1606.05	2126.67	3028.65	2708.6	2857.84	2680.44
Bradi1g66800.1	0.000603102	0.00135147	0.10227	0.0034403	0.00152706	0.000182474	0.000182474	0.785326	0.503427	0.785326	0.626634	0.589958	0.503427	MAGDRLSWARLLKWSLSYIDGARPSRAISEEERMWLAEAVERHMAADVVSRMREIALLMSTPPSVLEAQGITPDDIEGLLAELQVHVESIDIANDLHSVGGLVPVIKYLRNSNARIRAKAADVVTTVVQNNPTSQQLVMEASGFEPLLSNFISDPDLTARIKALGALSSLIRNNKPGVAAFRLANGYAGLRDALSSESARFQRKALNLTHYLLSESHSDCSVFAQLGFPRVMMTLVSSNDSGVREAALGGLLELARDTTLGNRSLLADQDRLRRLLWRRIQSIRMMAPEDLDAAREERQLVDSLWIACYHEPSTLQQEGLLVLPGEESFEQPPDVAGRFFEPLRRQSVGRAPPDERSEPVSGTVGGMMMLLGPAPGNSLSN	40186.2	59891.2	67009.6	54529	55404	37315.9	45440	37974.3	53310.6	43510.2	32150.2	40028.3	30248.7	36444.7	34718	34867.4	24783.4	31674.2	39419.1	32686	27068.4	22831.2	31941.6	29726.1	27891.8
Bradi1g67120.1	0.00228085	0.00435201	0.0370923	0.0562946	0.00281018	0.00073688	0.00073688	0.527985	0.142548	0.489713	0.527985	0.260387	0.142548	MSRPSRSDAHLSPVDEATRVAEVREYYDDAAPKRHTKPSRSEHSAVYADALADDSHPELDKLQQLEAHTGKLVCEGGKAGEEFVETEYYRDLGCVGKQHHTTGTGFIKMDKPTGASFELSDDPDATERHASCKGNPATNEWIPSADTVYLASDKPSRSDS	6461.42	15466.7	9876.43	5108.17	9228.18	5015.17	2990.96	4197.68	5872.8	4519.15	3660.87	4917.44	4164.52	6746.54	4872.34	3037.83	3375.99	2190.8	1006.97	2402.9	801.863	212.931	2138.39	2108.67	1315.46
Bradi1g67517.1	0.000954602	0.00201789	0.0162968	0.00294966	0.000769215	0.000585155	0.000585155	0.662572	0.493091	0.662572	0.575188	0.506098	0.493091	MSKKKSKNLQMVLSDGNGAAAASVVTGSAIAASYNDQIRPLLDAVDRLRHLKVTQEGIQLPTIVVVGDQSSGKSSVLESLAGISLPRGQGICTRVPLVMRLQDDPSADSPVLQLEYSNGRAVATTEAKVADAINAATAEIAGSGKGISDAPITLVVRKRGVPDLTLVDLPGITRVPVQGQPDDIYDQIARIIKEYIAPKESIILNVLTATVDFPTCESIRMSQQVDRTGERTLAVVTKVDKAPEGLLEKVTMDDVNIGLGYVCVRNRIGEETYDQARVEEEKLFKYHPLLSKIDKDMVGIPVLAQRLMQIQATIIAKCLPDIVRQINDRLSRNSTELEQMPPDVTSVADAVKEFIRIVKQVCGSLEKILVRGEFDDFPDDGHFHGTARVAEMLNRYAKK…	21893	38521.7	41589.9	28905.3	32727.5	23731.1	21023.8	19315.8	22666.5	21684.3	20880.6	17085.9	19317.9	18013.4	18824.4	19540.3	15734.6	18095.3	12883.1	16563.3	13048.3	12760.5	17970.7	20771	16137.6
Bradi1g67840.1	0.00135884	0.0027565	0.00595701	0.0488974	0.00148578	0.000834018	0.000834018	0.485851	0.0868988	0.285089	0.485851	0.141686	0.0868988	MEMQFAAVLASLALGGALLVLFFGKWWQPLADADRRVKELDDAVEALLQLRAAVLKQLDGAPESEQTRAWLRRAQEAQDEVASIKARHDAGQLYVIRLLQYFLAAGAVAAGALAEKQLKIVRAIQEQGAALLEAALATPQAPPPLLLQPEELELPLPATTGATRARLNEALRFLGDCDAALGVWGAGGVGKTTLLKHVRGVCGRVAPFFDHVFLVAASRDCTVANLQREVVAVLGLREAPTEQAQAAGILSFLRDKSFLLLLDGVWERLDLERVGIPQPFGVVAGRVRKVIVASRSETVCADMGCRKKIKMERLNEDDAWNLFEGNVGEEAVRWDTQISTLARQVAAECKGLPLCLAIVGRAMSNKRTPEEWSNALDKLKNPQLSSGKSGPDESTHALV…	22358.1	16947.6	9494.76	5036.2	13459.2	2446.5	3668.24	3635.1	5598.42	3837.07	6984.84	4494.16	7300.75	7376.87	6539.15	1004.05	1821.33	2815.54	1986.98	1906.97	1683.1	493.025	1004.52	1497.69	1169.59
Bradi1g67960.1	0.000100445	0.000288298	0.00714229	0.00125354	4.57639e-05	3.52104e-05	3.52104e-05	0.565207	0.269117	0.565207	0.459978	0.288478	0.269117	MASGGGGCLPAMDLMRSEPMQLLQVIIPTESAHLAVSYLGDLGLIQFKDLNADKSPFQRTYAAQIKRCGEMARKLRFFKEQMSKAGIQISPVQLTETPLDFDDMEIKLGELEAELTEVNANDEKLQRTYNELLEYSTVLQKAGEFFYSAQRSAAAQQREMETSQSGDISLESPLLEQDMFTDASKQVKLGSLSGLVPKEKAMAFERILFRATRGNILLRQESVDEPVTDPQSGEKVSKNTFVIFYSGERAKAKILKICDAFRANRYPFPEDLGKQMHTVQEVSGKISELKATIDMGLAHRDSILKTIALEYEHWNHLAKKEKSIYHTLNMLSVDVTKKCLVGEGWSPVFATSQVQDALQRATLESKSQVGSIFQVLNTKESPPTYFQTNKFTSAFQEIV…	362072	490108	567413	265559	421288	264403	205708	190189	292159	238115	183182	165297	176751	249903	193783	191219	124027	90414.2	80469.8	121532	102480	96467.8	127294	127262	113376
Bradi1g68520.1	0.0169742	0.0248894	0.240746	0.0621924	0.00364753	0.196915	0.00364753	0.761951	0.478413	0.761951	0.662253	0.478413	0.746039	MALQWMILACVVAAEAAVAALLTLPAPRAVRGQIVGLTSMFLQPFAGVLPFAGFQLLDIYWKKEHRLMCTTEVCTAEERVHFEKAIFKAQRNVILCVSVFLLYWSIYRICKINKDIKALEEIEKRIKEE	17658.1	14978.7	11486.3	8696.35	13204.8	9070.54	7570.45	12631.2	10973.6	10061.4	8781.89	9694.72	8626.91	7876.26	8744.95	5706.53	5835.41	5751.4	7976.15	6317.37	8193.03	6986.65	12213.8	12011.9	9851.33
Bradi1g69610.1	0.00840851	0.0135359	0.819931	0.987813	0.0102445	0.0323869	0.0102445	0.935595	0.375144	0.852768	0.935595	0.375144	0.478171	MKKLSFFLSLLAAVAVVHGEDGAYIGVNIGTAMSSVPAPTQITTLLRSQNIRHIRLYDADPAMLSALANTGIRVIVSVPNEQLLGIGNSNATAAKWVARNVAAHYPSVNITAIAVGSEVLSTLPNAAPLIMPAVRFLQNALVAASLDRFIKVSTPHSSSIILDSFPPSQAFFNRSLDPVLVPLLKFLQSTGAPLMLNVYPYYDYMRSNGVIPLDYALFRTLPPNKEAVDANTLLHYTNVFDAVVDAAYFAMAYLNVTNVPVMVTETGWPHKGDASSEPDANADNADTYNSNLIRHVMNVTGTPKHPGVAVPTYIYELYDEDTRPGTTSEKYWGLFDMNGSPAYALHLTGSGQLLANDTTNNTFCVARDGADEKMLQAALDWACGPGKVDCSVLTQGHAC…	4771.54	3522.56	4709.44	8779.47	5445.75	2175.97	5887.39	5005.69	5506.8	4643.96	4913.1	5425.16	4980.81	5061.01	5095.02	1515.6	1432.59	1968.87	3254.7	2042.94	3195.74	2577.53	1734.65	2908.07	2604
Bradi1g70760.1	0.000259484	0.000648229	0.986586	0.672838	0.0055441	0.0101219	0.0055441	1.16773	0.395869	1.05885	1.16773	0.395869	0.44333	MQTETQFSSAAMKRTSDWIRSQEFPSDITIQVGDGTFNLHKLPLASKCGYIRKLVSGANGSRVTHLEIPGLPGGAKAFELVIKFCYGANFEITADNVAMLRCAAEHLEMTEECKPGNLIGRAEAYLEEVALASLAGSVAALRASEELLPASERVQLVGRCVDAIALIACDGGDGYESGVVSVPAKAAVDDWWADELTALRIDTFQRVMIAMKARGFKGIALGTLIMLYAQKSLRRLDVNGRERKKMDPRQEHEKRVVLETIVSLLPREKNTMSVSFLSMLLRAAIYLDTSLACRLDLEARMAAQLGQAVLDDLLIPSSASPDADGGAAAFDVDAVQRILVGYLEHHEGGGEATAAMAMAPRGLDYNTDDDFVSVASPPPTDVALVGRLMESYLAEISSD…	151485	147783	247647	352723	224909	186231	274981	248101	243269	238146	297388	282255	239696	231195	262633	95120.4	90351.5	81619.8	89046.7	89034.6	84815.5	132793	106825	74403.4	99709.1
Bradi1g71170.1	0.00529162	0.00900176	0.229445	0.00760651	0.00321655	0.431969	0.00321655	0.747318	0.276214	0.672474	0.355964	0.276214	0.747318	MGFWEAFLNWLRSLFFKQEMELSLIGLQNAGKTSLVNVIATGGFSEDMIPTVGFNMRKVTKGNVTIKLWDLGGQPRFRSMWERYCRAVSAIVYVVDAADRENMAIAKSELHDLLSKPSLGGIPLLVIGNKIDRPEAFPKQSFTEAMGLKAMTDREVACFMISCKNSTNIDSVIDWLVKHSKKKN	9556.15	24657.9	33389.1	37036.8	26160	13772	17523	18880.1	20192.5	17591.9	8507.89	8646.03	10361.3	9732.82	9312.02	6747.96	9996.69	7576.53	4581.84	7225.76	12515.2	15024.9	24051.2	26608	19549.8
Bradi1g72080.1	1.0868e-05	4.59589e-05	1.713e-06	0.000181281	5.47014e-05	1.02122e-05	1.713e-06	0.4539	0.249482	0.249482	0.4539	0.407903	0.321497	MESDSKSAVCCMCGDHGLLPELFRCAACSVRSQHTYCTDRYPKAEAYGTCNWCLKTGQSATGNAAPSIPASSTLEAIAARPPGAAHGSDPTTCSRLMPPPANKVVVAARGDFAAELNKPIKKQQLQQQRRKLLLRRSASDLGSGRGGAGPPSPGVVARGRPRVRRYKLLEEVISS	5482.03	5270.48	2931.32	4387.72	4517.89	1117.76	1448.25	974.985	967.542	1127.13	2138.47	1811.88	2696.8	1555.52	2050.67	1985.3	2142.82	1289.15	1954.16	1842.86	1487.64	1763.99	882.294	1676.03	1452.49
Bradi1g72560.1	0.000428355	0.00100496	0.862199	0.0042179	0.00170657	0.00121319	0.00121319	0.883508	0.285822	0.883508	0.38762	0.311552	0.285822	MAREAEEQALLSTEIVNRGVEPSGPDAGSPTFSVRVRRRLPDFLQSVNLKYVRLGYRYMLSHGVYLATIPVIVLVCGAEVGSLSRDELWRKVWDEATYDLATVLAFLAVLAFTISVYIMSRPRPIYLIDFATYKPPEELKVSKAEFIDLARKSGKFDEESLAFQSRLLAKSGIGDESYMPRCVFQPDANCATMKEGRAEASAAMFAALDELFDKCRVRPKDVGVLVVNCSLFNPTPSLSAMIVNHYKMRGNILSYNLGGMGCSAGVISIDLARDMLQASGAGLAVVVSTEAVSFTWYAGKRRSMLIPNAFFRAGCAAVLLSNRRRDFHRAKYQLEHIVRTHKGADDRSFRSVYQEEDEQRIKGLAISRDLVEVGGHALKTNITTLGPLVLPFSEQLLFF…	87320.5	126852	108215	86331.8	102180	56938.3	51793.9	110721	141653	90276.7	41647.8	35703.9	44464.2	36611.9	39606.9	22276.4	20157.4	45624.5	39278.9	31834.3	37580.1	24503.8	22366.5	32370.7	29205.3
Bradi1g72640.1	0.000447777	0.00104326	0.117151	0.000479947	0.00231445	0.000764072	0.000479947	0.793822	0.51781	0.793822	0.51781	0.609777	0.558721	MSRGSGAGYDRHITIFSPEGRLYQVEYAFKAVKSAGVTSIGVRGKDSVCVVTQKKVPDKLLDETSVTHLFPITKYIGLLATGLTADARSLVSQARNEAAEYRKKWGYEMPVDVLAKWIADKAQIYTQHAYMRPLGVVAMVLGYDEEKNAQLFKCDPAGHFFGHKATSAGLKEQEAINFLEKKMKDSPQFTYDETVQIAISALQSVLQEDFKATEIEVGVVRKEDRVFRALTTEEIDQHLTAISERD	13394.2	18820.3	17452	15163.2	16207.4	12991.1	10484	15691.7	12296.5	12865.8	7987.46	7398.21	6651.04	11532.8	8392.38	6608.04	10185.2	11990.2	10748.2	9882.93	8488.14	8472.95	10720.1	8540.53	9055.44
Bradi1g72762.1	0.000142637	0.000386379	0.920208	0.05175	0.00307566	0.999115	0.00307566	1.24819	0.619644	0.942305	1.24819	0.619644	0.983205	MGASLSLVPLIDYFARREFLAAGLRPNTATLPYPDGGPSASCTVHYWAPPGEPRLPPLLLVHGFGPRATWQWRCQVGPLSRRFHLIVPDLLGFGGSSCGSSSAAPPPPSEATQAAALAALLDSLPGLNSKDDSGKIKRVAVAGTSYGGFVAYWLARAAGEARVGPVVIASSDLLKTAADDRGFLKRAGDGWGGVHELLLPAQPAAMRRLMEMAVYRPPPPLMTPDFVLRDFIQKLFTDNREQLIHLLKGITVGTDKFQVTPLSQEVLIVWGEHDQLFPVEKAFAIQRSLDGKARVEIIKKTSHTPQLEDPARFNKILLDFLQAADAPADPACIKGSSQ	12173.5	11570.5	14808.8	12133	12671.4	10002.2	12903.2	12646.9	12209.2	11940.4	16729.8	17075.1	14351.3	15109.3	15816.4	6074.96	9827.49	7855.78	7648.91	7851.78	9584.61	12860.2	15310.3	12079.5	12458.6
Bradi1g74922.1	0.01176	0.0180481	0.0047151	0.14367	0.0143327	0.31117	0.0047151	0.830426	0.604323	0.604323	0.782269	0.659538	0.830426	MATPPTQGEPSSSDPKSKKDYSTAILERKKSPNRLVVDEATNDDNSVVALHPDTMERLQLFRGDTVLLKGKKRKDTICIVLADETCEEPKVRMNKTVRKNLRVRLGDVVSVHQCPDVKYGKRVHILPIDDTVEGITGNLFDAFLKPYFLEAYRPLRKGDLFLVRGGMRSVEFKVIETDPAEYCIVAPDTEIFCDGEPIKREDEERLDEVGYDDVGGVRKQMAQIRELVELPLRHPQLFKSIGVKPPKGILLFGPPGSGKTLIARAVANETGAFFFLINGPEIMSKLAGESESNLRKAFEEAEKNAPAIIFIDEIDSIAPKREKTNGEVERRIVSQLLTLMDGLKSRAHVIVMGATNRPNSIDPALRRFGRFDREIDIGVPDEVGRLEVLRIHTKNMKLA…	395690	350953	304166	205440	314062	182312	194680	152736	229451	189795	247053	204939	233946	296786	245681	195295	211514	245852	175881	207136	257105	273703	264135	248277	260805
Bradi1g75140.1	3.74764e-06	2.08048e-05	0.999815	0.0583709	0.000191147	0.0037847	0.000191147	1.27337	0.433974	1.01273	1.27337	0.433974	0.579816	MRSSSSTSSGGGRRRRTSDYHGGRASSGDLSRFSVATAASSSSSAPAASERSANGGRGAAFLDAFRSCFSPAEARSPDTSLSEDFHPSRQLSQSISSQGSSSGSTFESKRSTRGLYGPIHRNSSEREIPGDRKFSLPEIQKATKNFSPNLKIGQGGSGTVYRGQLSDGTLVAVKRAKKNLYDKHMGHEFRNEIETLRCIEHLNLVRFHGFLEYGGEQLIIVEYVPNGNLREHLEGLNGKFLEFSVRLEIAIDVAHAITYLHTYSDQPVIHRDIKSSNILLTNNCRAKVADFGFAKLAPSDATHVSTQVKGTAGYLDPEYLRTYQLTEKSDVYSFGVLLVELVTGRRPIDPKRTIIERVTAKWAMEKFAEGDAILTLDPNLEATDAINLAVEKIYELALQ…	14635.8	14415.2	15014.9	13720.9	14446.7	14474.8	14603.5	13149.8	16294.5	14630.7	13977.9	22949.3	17175.1	19481.7	18396	5348.3	5898.6	7152.18	6678.9	6269.5	8064.71	5475.55	8859.85	11105.7	8376.44
Bradi1g75290.1	8.60194e-05	0.000253917	0.432554	0.0643301	0.000204641	0.000115369	0.000115369	0.837917	0.347686	0.837917	0.70833	0.369493	0.347686	MPISRVAVGSHHEVYQAGALKAAVAEFISTLIFVFAGQGSGMAFNKLNAGGAATPAGLISAAIAHAFALFVAVSVGANISGGHVNPAVTFGAFLGGNITLFRGLLYWVAQLLGSTAACFLLRFSTGGLPTGTFGLTGVSVWEALVLEIVMTFGLVYTVYATAVDPKKGSIGTIAPLAIGFIVGANILVGGAFDGASMNPAVSFGPALVSWEWGYQWVYWVGPLIGGGLAGVIYEVLFISHTHEQLPTTDY	335373	583613	720126	553795	548227	401400	473381	434156	528536	459368	359538	470110	390839	332816	388326	307440	175461	156536	170826	202566	158784	168979	228501	206177	190611
Bradi1g75620.1	5.3835e-07	4.68538e-06	0.431825	0.00351909	7.01022e-08	2.46929e-06	7.01022e-08	0.913169	0.455077	0.913169	0.75608	0.455077	0.545948	MPAGHGLRSRTRDLFARPFRKKGYIPLTTYLRTYKVGEHVDVKVNGAVHKGMPHKFYHGRTGRVWNVTKRAIGVEINKQVGNRIIRKRIHVRVEHVQPSRCAEEFRLRKVKNDQLKAEAKARGEVISTKRQPAGPKPGFMVEGTTIETVTPIPYDVVNDLKGGY	126604	159767	151039	145252	145665	113592	139721	137783	140971	133017	117372	118425	83023.5	121717	110135	74536.3	70569.5	56349.7	63700.2	66288.9	77489.9	77651.3	82635.9	80325.3	79525.6
Bradi1g76630.1	3.79437e-08	5.96511e-07	0.988615	6.96181e-06	0.000943905	0.0028988	6.96181e-06	1.88627	0.397321	1.04523	1.88627	0.397321	0.471853	MAGERPVVAPGVVVLLLCCLAAPMVRGGGGGGGVQHNITSFLNGHPEYKLYNKYLTETRVCDEINARAAVTCLVLNDGAMATLVADAGESSLAGIKAALRLHSLLDYWDTKKLRSLTTTNLTDTFFQAAGDAMGTVKIAKLDSGDFGFASANKGAKFDATLVKAVKQTPYDFAVLEISAPIEFDGLFDVPDAANLTRLLEKAGCKRFAALVAGNPGVLKAYQAAMATGLTLFAPNDDAFVAKAGTPDVGKMEKDDLVRLLMYHAVPAYEPKPSLKLVKAGARPLRTLASTAAGEYNVTVVARGDDVSLDTGVRKSRVAATVLDEVPLCVLTVDSLLMPVELFADAPMPAPAPAPAMAPADAPLGSSSSSPPAPPPADAPSEVADHKAKHVKSTAAALRS…	7762.27	8568.95	11223.1	9691.98	9311.58	7290.37	8488.82	11354.8	11797	9732.75	14877.9	16744.6	19060	19574.4	17564.2	3990.96	4162.52	2640.48	4004.79	3699.68	2686.82	5717.25	4583.1	4587.63	4393.7
Bradi1g77560.1	1.91989e-05	7.23444e-05	0.0635629	0.204208	0.00136092	0.210782	0.00136092	1.22327	0.611913	1.22327	1.16666	0.611913	0.834991	MAYCLLLAAALLLLAVDGAMAAGAVHKVGGLDAWGIPPASKPDVYVRWGNSTKVSLGDALMFLYPPSQDNAVQVTAKAFAACDVAKPLAKLDDGNSIFNLTAPGRAYFTSAAPGHCRKGQKVSVDVPKADGSLVQPSADDLAALKVLETLPPAAAPSDSLPALSPVDGDEDSSDAAVTRASAAAGFVVSAAAALFFGFVL	607196	678020	883877	772554	735412	827948	965236	924925	880314	899606	746136	946237	780338	959203	857979	370642	402134	487439	539818	450008	650928	536143	672881	596295	614062
Bradi1g78170.1	0.0120251	0.0183921	0.919628	0.984391	0.0132324	0.0523479	0.0132324	0.936041	0.439795	0.89651	0.936041	0.439795	0.557146	MAVGKNKRISKGRKGSKKKIVDPFTKKEWYDIKAPLIFSTRNVGKTLVSRTQGTKIASEGLKHRVFEVSLADLQADEDQAYRKIRLRAEDVQGKNVLTNFWGMDFTTDKLRSLVRKWQTLIEAHVDVKTTDNYMLRMFCIGFTKRRPNQVKRTCYAQSSQIRQIRRKMVEIMVNQATSCDLKELVQKFIPEVIGKEIEKATSSIFPLQSVFVRKVKILKAPKFDLGKLMEVHGDYKEDVGMKVDRPAEGDEAIIPGAEDVAAAAE	26836.1	33082.2	38140.1	56252.1	38577.6	20255.9	49150.9	32553.5	36380.6	34585.2	29103.1	45497.4	31339	38501.5	36110.2	22813	19777.5	13520.7	11753.7	16966.2	18432.7	18233.5	22683.5	26623.8	21493.4
Bradi2g00220.1	0.00180415	0.00354265	0.381857	0.492814	0.0285285	0.0483429	0.0285285	1.17473	0.656309	1.17473	0.847099	0.656309	0.687359	MEAMQRSFLVLLVISAAITASAQGPTAAPTTPAPAAPAPAAGTTKTTNITGVLAKAGQFNTFIRLLRSTGVAAQIDNQLNSSQTGGLTVFAPTDNAFTSLASGTLNSLSDSQKNSLVQFHVLSTAVPMSQFDTVSNPLRTQAGSSSPGEYPLNVTATGQQVNISTGVVNATVDNTLFTGDQLVVYQVNQVLLPMAIAGKKADAPAPAPLGPAKKTPVAADAPGGADADTDSTASRAAGGGGGGGVVAVAMALASCVLCWGL	652398	735940	926290	1.06127e+06	843974	1.04311e+06	1.23855e+06	856420	827677	991440	738812	699732	721239	699937	714930	526063	692126	469743	527701	553908	661221	690953	488564	479713	580113
Bradi2g00800.1	0.00251257	0.00472728	0.150482	0.0201383	0.00267965	0.0014168	0.0014168	0.710094	0.37719	0.710094	0.564029	0.4244	0.37719	MAPKKEKAPPLSSKPTKSDGGKQKKKKWSKGKQKEKVNNAVLFDQATYDKLLTEVPKYKQITPSVLSERLRINGSLARRAIKDLMERGLVRMVSIHSSQQIFTRATNT	64815.5	116321	67436.8	54572.2	75786.5	34256.4	54196.3	59916.7	66892.7	53815.5	40283	49788.6	33847.6	47063.9	42745.8	28041.2	40820.6	26198.6	33594.7	32163.8	24135.5	28908.6	27335.1	33964.4	28585.9
Bradi2g01430.1	1.15392e-06	8.69632e-06	0.036454	7.78465e-05	1.67137e-07	6.23414e-06	1.67137e-07	0.807987	0.391297	0.807987	0.5978	0.391297	0.513709	MTTAWRALLLLVVSAVLVQIRASEPLLYEPFDESFEGRWVVSGKDEYKGVWKHAKSDGHEDYGLLVSEKAKKYAIIKELDFPVTLKDETVVLQFEVRLQNGLECGGSYLKYIRLQDSTWDAKEFDNETPYSIMFGPDKCGSTNKVHFILKHKNPKTGKYVEHHLKFPPSVPYDKLSHVYTAILKPDNEVRILIDGEEKKKANFLSADDFEPALIPPKTIPDPDDKKPEDWDERAKIPDPDAVKPEDWDEDAPMEIVDEEATKPEGWLDDEPEEIDDPEAAKPEDWDDEEDGEWEAPKIDNPKCEEAPGCGEWTKPMKQNPAYKGKWHAPLIDNPNYKGVWKPQEIPNPDYFELDKPEFDPIGAIGIEIWTMQDGILFDNILIADDEKVANSILEKTWKP…	426630	460505	466214	341234	423646	303501	312306	359075	394320	342301	240065	228506	235543	308908	253256	163459	170188	175231	154208	165771	249929	173551	244278	202765	217631
Bradi2g02000.1	1.10109e-05	4.64176e-05	0.0295064	6.29731e-05	7.83092e-06	1.32618e-05	7.83092e-06	0.630747	0.132205	0.630747	0.245538	0.132205	0.153405	MAMDDVSAASLDAFAASSSSSAPASADPSHGWQKVTYPKRHRKPQPAPSTAPAGADLANGGRPGVFEGVDKRAQDRHRAIQAARDAAADADGPIAAWARSDDSDDDSDEAAARSSAQPAEEKKPKKPKVKKPKVTVLDAARLIDAENLEAHLVDISASYENQEGIQLMRFADYFGRAFASVSAAQFPWAKMFKESPVDKMVDIPLCHIPEPVCKTASDWINRKSPEALGEFVLWCIDSIMSELSGQAVGPKNSKKVVQQTPKAQVAIFVVLALTLRRKPEVLINLSPKIVGNSKNLVPEKLPIVAWVIAQASQGDLVSGMFCWAHSLFPTICGKSSVNPQSRDIVLQLLERFYSPIKAQAILLNGAIRKGERLIPPSAFDLFMRCAFPLSNARVKATER…	5725.17	11438.8	8366.78	9373.94	8726.18	2451.47	5751.63	7036.38	6776.57	5504.01	2015.63	2167.25	1956.79	2430.78	2142.61	1235.91	471.324	2285.4	621.95	1153.65	1390.36	1159.69	368.628	2435.89	1338.64
Bradi2g03190.1	7.43413e-05	0.000224857	0.999586	0.0288305	0.000150207	0.00128182	0.000150207	0.989993	0.615695	0.989993	0.800702	0.615695	0.697863	MGTILDALASMFLAKLGQLIEDEVVMTLSVKRDIKRLKNNLEHFSAVREDAEALALEDRQIEAWWRNMSDVMFDVDVIIDLVMVQSQKLLLPPRSVCCNRFMTSCFGKLSFDHRVARKIRDINERLDEIKTNTEMFSLDRTSRQQFQVTTVDRNQTSPIDELEVVGREIKQSVDDMVQMIVSSCHENRSNVLVFKGWEALWVAEGFVRKEHEYSIHETAEEYYLELVRRNLLQPIPESVDKGVSTMHDVLRSLGQYLTKEHSQFMNAESNHSLLNLRRLGISHVVEEIPTLEEHKCLRSLLLFNNKNFKSVHKDTFRKLEHIRVLVLSGTSIQNIPESVGNLVLLRLLDLSFTEINKLPESTGSLISLEYLSLRGCCWGTRYATLAQNNNFYRFCPDQC…	22855.3	29304.7	26627.9	25248.6	26009.1	23036.6	24344.6	26898.5	28715.6	25748.8	23402.1	22532.3	19326.2	18041.6	20825.5	14804.8	16317.7	19589.9	13342.5	16013.7	19015.6	19813.4	16602.6	17171.6	18150.8
Bradi2g03297.1	3.76476e-05	0.000128731	0.0474917	0.00406998	1.96372e-05	3.70505e-05	1.96372e-05	0.700853	0.286124	0.700853	0.567842	0.286124	0.295262	MKVSVVSRSGREVVRGGIDLPDSAKVADLQEAIHAKTKKYYPARQRLTLPLQPGKSGKPVVLSPKSSLSEYCEKGSGSLKVVFKDLGPQVYYSTLFFWEYVGPLIIYPIFYYLPVYKYFGYEGERVIHPVQTYAMYYFCFHYFKRIMETFFVHRFSHATSPVSNVFRNCAYYWTFGAYIAYYCNHPLYTPVSDLQMKIGFGFGIVCQIANFYCHILLRNLRSPTGSGGYQIPRGFLFNIVTCANYTTEIYQWLGFNIATQTVAGYVFLAVAAAIMTNWALGKHSRLRKLFDGKDGRPKYPRRWVILPPFL	85204	101795	83945.2	50795.6	80435	43021.9	46517.4	63460.7	72492.6	56373.1	40339.6	40921.3	44277.4	57159.1	45674.4	19698.1	20399	25249	26711.6	23014.4	33053.5	20453	20779.8	20711.2	23749.4
Bradi2g03460.1	0.000717516	0.00158417	0.657314	0.229689	0.000593394	0.00279843	0.000593394	0.922434	0.644236	0.922434	0.866757	0.644236	0.702557	MAEYPHRHGHGHGRRGGGDDDSDDRRRHAPAYGHQDPYDAAPPSYGRPAADPYDAPPPSYGRPPADPYGRAPPAYGGGRDDDDGGYGRRAPPPSYGREDDGGYGGRAPPPAYGHGGRDDDGGYGGGRAPAPAYGNVVHVSHESGEEDRPHYGGGSGYGHETRPHHGGGGGGGAAPVRQQTFRIVCKAGEAGFSLAARDGKVCLVRTDRDDDAQHWIKDMKYSTRVKDEEGYPAIALVNKATGEALKHSLGQSHPVRLASYNPEYMDESVLWTESRDVGEGYRCIRMVNNIYLNFDALHGDKDHGGVRDGTTLVLWEWCEGDNQRWKIVAWCKFFCLSPGLALYIYLLSHQFSFMSASSLS	298930	353671	359032	281736	323342	346522	298244	258886	289396	298262	250121	275016	261109	334792	280259	214268	232982	201280	184705	208309	233295	190918	249137	235316	227167
Bradi2g03560.1	0.00173907	0.00343988	0.98724	0.624194	0.00127504	0.0292891	0.00127504	0.969996	0.63044	0.969996	0.907359	0.63044	0.755512	MEPPSSPNNPNHKEIKSPPPVPSPAPPPPPNPSLHRKKLSFHFMDSDDRRYPPPGPGSTTPLNIRGSPIPAADLPKTGGWTAAFFIFGNEAAERMAYYGLSVNMVVFLFKVMHLPFAASANAVNAFLGISQASSVLGGFLADAYLGRYWAIALFATLYLLGLAALTLCATLPALVPAQDGCDKLLLLLGGCAKASPWQTGCLYAALYVTAFGAAGIRPCVSSFGADQFDDRDGNYKRRLDRFFNVFYLAVTVGAIAAFTVVVYIQMNHGWAAAFGTLALAMGASNALFFAGTPLYRHKAPGGSPLTRVAQVLVAAFRNRNADVTETGFVGLYEVAGPKSAIRGSGKLEHTDRMAWLDKAALMTPEAAGGDAPDPWRVCTVTQVEEVKILLRLVPVPACT…	12432.6	14485.1	16900.5	13279.5	14274.5	14693.8	14009.6	14703.6	11977.6	13846.2	12774.2	13359.8	12753.1	12921.1	12952.1	7342.2	6746.96	11307.3	10600.2	8999.18	12255.1	11619.1	10790.5	8473.48	10784.5
Bradi2g03687.1	9.29206e-05	0.0002725	0.0540642	0.000124873	0.000140865	0.000766565	0.000124873	0.813736	0.57858	0.813736	0.57858	0.597858	0.665673	MAARSALLFALLVAALSFTATAAGDAPFIVAHKKVALSRPKPGVERLAVSLDLYNQGSATAYDVAITDDSWPKEAFELVSGEVSKTLERLDPGATASHVFVLETKAQGRFQGSPAVIKYRVPTKAVLQEAFSTPILALDILAERPPVKKFEWAKKLVAKYGALVSVVSFVAAFIYLVASPSKSGGAKAGKKRR	34988.5	41742.7	42269.5	32478.6	37869.8	25033.5	32891.8	29479.3	35859.5	30816	20920.6	22716.2	18766	25240.2	21910.7	27712.8	20358	19770.1	22722.3	22640.8	23513.3	24400.2	27336	25586.2	25208.9
Bradi2g03760.1	9.35492e-06	4.12412e-05	0.17407	0.000262041	5.38847e-06	5.69247e-05	5.38847e-06	0.861512	0.501613	0.861512	0.640571	0.501613	0.563988	MSTVVEPALQHEVKLYNRWSYDGVAVNDISLNDYLAVTLPKHFTYLPHSAGRYSAKRFRKAQCPIIERLTNSLMMHGRNNGKKIMAVRIIKHTMEIIHLLTDANPIQVIVDAIINSGPREDATRIGSAGVVRRQAVDISPLRRVNQAIYLLTTGARESAFRNVKTIAECLADELINAAKGSSNSYAIKKKDEIERVAKANR	585214	721245	661072	619670	646800	454298	586190	593765	594652	557226	394654	501366	361472	399794	414321	247633	422061	290830	337250	324443	306267	412637	372852	367393	364787
Bradi2g04080.1	0.0240365	0.0335664	0.0158339	0.158292	0.0308788	0.0184227	0.0158339	0.646039	0.439238	0.439238	0.646039	0.497817	0.452692	MYAAQSHRCRRARERGIHAHGGVARKRTSLSPPQVLLCFIGAAVLLANARHALFAKVDAKAVADGDTMTVHVDTADPREFGNVPPEVQEAVAERTKARAAKDYQKADALQKILVDAGYRQVPNSRGEQVLAKKYWIRLRGIDAPENSMPYGKEAKEELVKLVQGKALKISIYDKDRYDRLVGDVECNGIFVQEHMLKRGLTWHYTAYDRRLELATISRVFDLRLAADDPWCYCRAIHDSVLMPAWIVFWRADTMKKHQAQGISAGGVYRYTHRREGGADIHDVFVEKSASRLLFSYIGAMLLLANVCYALLKQESLCLSSFWCVPFSAIVAKSLQYKPVKKESLMIMPGFGVQLEQHFWSGRVHRQFVPIGKILKPVLNECVTPVTCYWSLALLVRNED…	48438.9	30597.1	21741.8	13922.6	28675.1	12107.6	12457.9	11278.3	14536.9	12595.2	21513.8	14412.9	17366.8	20807.4	18525.2	14696.8	15294.5	14394.5	12714	14275	13894.8	11633.4	13214.7	13181.2	12981
Bradi2g05480.1	4.27368e-06	2.26976e-05	0.00153609	2.69566e-08	0.000143079	0.000132	2.69566e-08	0.674053	0.352981	0.674053	0.352981	0.570283	0.578211	MASPSSFKVTRISEGPVKPASPDTPGHTLPLAWVDRYPTHRGLVESMHIFRSGADAAPGVIRDALAKALVFFYPLAGRIVEPEKEAAAAAAAAAAGENGDGEKKAPAASFPLGVRCAGDGVYFAEAEAECSLEDVRFLERPLLLPKEDLVPYPGPDKWSVEPHNTIMMMQITKFTCGGFVMGLRFNHASADGMGAAQFIKAVGDMARGLPEPAVKPVWDREKFPNPSIKPGPLPELPVLALDYIVLDFPTGYIDGLKAQYKAHSGKFCSGFDVLTAKLWQCRTRALNLEPGATVKLCFFASVRHLLKLDPGYYGNSIFPVKMSAPSEKVLGSSVMEVIDMIREAKQRMAVEFFQFAKEETKQDPFQMSFDYESIYVSDWSKLGFSDVDYGFGPPMFAGP…	259735	244772	271040	224839	250097	126530	141104	188396	218284	168578	80567.8	94023.9	81272.5	97253.3	88279.4	162104	128118	148474	131808	142626	130541	115261	170431	162202	144609
Bradi2g05620.1	0.00327403	0.00595239	0.035318	0.00458574	0.0041573	0.00174845	0.00174845	0.592336	0.385162	0.592336	0.44936	0.438486	0.385162	MLSARTAAASPAASLWKRAGGEGGSGNGNGNNGCTSCREVRRRAAVVTVRATPPRRVEAVAMESAAAEIAEAEAEAVAMESAVAEAETAEEEAEKEVAAAGGGVEDKYGEDRATEELPVTPWAFSVASGYTLLRDPHHNKGLAFTEKERDAHYLRGLLPPGVVSQDLQVKKIMHNLRQYKVPLQRYVAMMDLQERNERLFYKLLIDNVEELLPVVYTPTVGEACQKYGSIFRRPQGLYVSLRDKGKVLEVLRNWPERNIQVIVVTDGERILGLGDLGCQGMGIPVGKLSLYTALGGVRPSACLPITIDVGTNNEQLLNDEFYIGLRQRRATGEEYHELMEEFMGAVKQIYGEKVLIQFEDFANHNAFDLLAKYSQSHLVFNDDIQGTASVVLAGLLSSL…	11916	15682.9	10004.3	5082.17	10671.3	7289.71	3994.19	6573.49	7426.64	6321.01	4679.08	4225.86	5460.48	4815.62	4795.26	4953.4	4605.55	4614.22	4543.73	4679.23	4485.82	3832.96	4011.31	4110.67	4110.19
Bradi2g05640.1	0.000118214	0.000327455	0.503815	2.67748e-05	0.129076	0.357803	2.67748e-05	0.879698	0.405395	0.879698	0.405395	0.799137	0.856507	MAGSSSFFQDARLPQQRAVEGVAFPAVLVPSFRGGPGGLGGLEEFLAAVRSERASRVEPLARAAGAVLLRGFPVRTAAEFDRAVEAFGYEELPYVGGAAPRSNVVGRVFTANESPPDQKIPFHHEMAQVPTFPSKLFFFCEVEPKSGGETPIVLSHYVYKRMKDRFPEFVEKLEKDGLIYTRVLGEGDDPSSPIGRGWHSTFLTKDKAVAEERALKLGMKLEWTGDGVKTVMGPIPAVKWDEARGRKIWFNSMVAAYTGWKDARNDPVKAVTFGDGSPLPADVIGECGKILEEECVAIPWQQGDILLIDNWAVLHSRRSFEPPRRVLASLCK	166768	160982	135376	115428	144638	161732	126260	113717	107244	127238	47578.9	58124	52907.5	75932.6	58635.8	115230	134339	122049	90725.9	115586	117739	114795	130391	132609	123884
Bradi2g06250.1	1.56033e-06	1.06848e-05	0.000860458	2.17804e-05	5.66672e-08	2.84297e-06	5.66672e-08	0.572774	0.182306	0.572774	0.356737	0.182306	0.317649	MKRNPRVTSSRRKCRKAHFTAPSSVRRVLMSAALSSELRHKYNVRSIPIRKDDEVQVVRGTFKGREGKVVQVYRRRWVIHVERITREKVNGSTVNVGIHPSKVVVTKLKLDKDRKALLDRKARGRAADKAKGKFTADDVAAAAGGAAATGASLQEID	7733.22	7312.33	7943.65	6432.08	7355.32	1934.1	4512.81	5713.24	4691.61	4212.94	2651.02	2744.86	2079.36	3020.4	2623.91	1711.86	1307.28	947.742	1396.79	1340.92	3011.02	812.181	2626.65	2895.77	2336.41
Bradi2g06467.1	9.04778e-06	4.01495e-05	0.00341637	8.04623e-06	3.83508e-05	0.000169604	8.04623e-06	0.78666	0.581149	0.78666	0.581149	0.666658	0.668524	MSTEKKQLNPMREIKVQKLVLNISVGESGDRLTRASKVLEQLSGQSPVFSKARYTVRSFGIRRNEKIACYVTVRGEKAMQLLESGLKVKEYELLRRNFSDTGCFGFGIQEHIDLGMKYDPSTGIYGMDFYVVLERAGYRVSRRRRCKARVGIHQRVTKEDAMKWFQVKYEGVILNKSHAS	136282	158456	159926	142917	149395	94861.8	121721	126349	127161	117523	91188.3	87462.5	77944	90688.6	86820.8	99088.9	117734	92111.1	89448.7	99595.6	109544	95724	97252.9	96976	99874.3
Bradi2g06830.1	0.0018279	0.00357886	0.444389	0.991984	0.0731534	0.0193468	0.0193468	1.18908	0.572178	1.18908	0.956763	0.664603	0.572178	MAIRRQRRPFPLLPLLISLLAAAAYGRLISDGSPASTASSSILIASPVSSSDVIRLNTSSPAAAEAEQCEQSYGFLPCTTTVFGNLFLVLTYGFLMFKAATFLSAGSELLLEIMGPGLVGGLLLPILGALPDALLVLVSGLSGTKETAQSQVLIGMGLLAGSTVFLLTLLWGTCVVVGKCDVGPNNVAIDSTDTKGFSLTGAGISTDVQTSYAARIMAISVIPFVIAQFPKMLKTHHGERLAILLALIASFSLVLAYCLYQVFQPWIQKRKLAYAKHKHVISGILKHAQMQALGRLLNDDGTPNENVIRKLFYKIDMDESHNLSRSELHALIIGINFEEIDFDKDDAVDKIMDDFDTSGNDTVEEAEFIAGMKKWLNEAKRNVPASGAFSNKFVNDYHA…	95012.7	168878	206436	159299	157406	158876	161680	186700	241419	187169	136808	151100	143977	170517	150601	123565	106630	79758.7	108497	104613	77181	99414.8	106206	77456.1	90064.4
Bradi2g07650.1	0.00265435	0.00495944	0.637694	0.00873582	0.983147	0.999906	0.00873582	1.11417	0.632812	1.11417	0.632812	1.04064	0.989397	MESLGVLLLHPMNAYLEQELDRRFRLLRLWESPPDSRADFLRANASAIRAVVGNAGYNADAALIDALPSLEIVASFSVGIDRVDLAKCRERGIRVTNTPDVLTDDVADLAVGLAIAALRRIPQADRYVRAGLWKAKGDYTLTTRFSGKRVGILGLGRIGLAIAKRAEAFGCSISYHSRSEKPFPNYRFFTNVVDLAANCDVLVVACSLNAETHHIVSRKVMVALGPEGVLINIGRGAHVDEPELVSALLAKQLGAAGLDVFEHEPFAPEQLFGLDNVVLVPHIGSDTEETCMAMADLFSGKRVGIIGLGRIGLAVATRVEAFDCPVNYYQRTKKEYPNYTYYPTVLELASNSDVLVVACPLNEQTRHIVNREVIEALGPKGVLINIGRGPHVDEPELVS…	177268	248556	230738	293535	237524	245160	281932	302920	228555	264642	146056	167649	137881	149645	150308	267630	200901	266080	254097	247177	245166	277032	191977	225848	235006
Bradi2g08100.1	1.7126e-05	6.60086e-05	0.0059793	0.148209	0.00982991	0.262395	0.0059793	1.44018	0.5863	1.44018	1.24811	0.5863	0.792134	MGCASSKDVAVADVAYRPPATSVSLFDISAVEEPWLIAKQSADAVVESGDDESEEEEEEEEEEEEEEVKKPTPGVPLPILDKLDGYELAPASWSEVSKALEDIKPTLGSKPPSDPKPLPKKKKKKQQQQQPAAAEAPAQPPPPQTPAQPAPSQTPAEAGKKAYMPGAEDTTKKPPPPELTGRRVVKENPFLLRDRESSKNADGTAAPRWRRRDPFEGFPERRPPGATGGGVVLYTTTLRGVRRTFEDCERARAAVETCAEAAGMGALDERDVALHGEYLRELRELLAGVEEEGGASVPVVPRLFVMGRYVGGAEACAGLAESGKLREMLRWARARGEACAAKDGRGCEGCGGARFVPCWECGGSCKVLVGGGDGAGAAVTVGGGVVERCGKCNENGLMI…	65513.5	72121.4	91425.7	107813	84218.4	99976.4	122316	141485	121380	121289	114451	101077	98893.1	106035	105114	42646.2	33587.1	64847.2	56428.6	49377.3	68397.8	67075.5	75187.8	56187.8	66712.2
Bradi2g08260.1	0.000113499	0.00031909	0.405734	0.00362664	0.000138021	0.000492789	0.000138021	0.861753	0.452029	0.861753	0.622753	0.452029	0.521727	MSTAAAQGGEKPALRKPVFVKVDQLKPGTNGHTLVVKVVSANPVPGRTRPGAPASSSRPPRIAECLVGDETGTIIFTARNDQVDVLKPGATAILRNAKIDMFKCSMRLAVDKWGRVEAAEPASFTVKEDNNLSQVEYELVNVAE	25668.3	28909	21240.8	19079.6	23724.4	21273.2	14901.7	23405.5	22198	20444.6	15082.9	12606.3	14122	17286.6	14774.4	14277.4	9494.84	11469.7	7654.62	10724.1	10366.2	11736.1	13777	13631.4	12377.7
Bradi2g08960.1	0.0111129	0.0171329	0.734891	0.0449207	0.00703371	0.0321066	0.00703371	0.867171	0.490186	0.867171	0.619697	0.490186	0.595992	MSLRPNERVEARKSSYKSTVDADDGRRRREGDMVEIRKSRREESLLKKRREGLQAQAPVPAAGVEKKLESLPAMVAGVYSDDINLQLEATTQFRKLLSIERSPPIEEVIKSGVVPRFVQCLGRDDFPQLQFEAAWALTNIASGTSENTKVVIDHGAVPIFVKLLGSGSDDVREQAVWALGNVAGDSPRCRDLVLESGALMPLLAQLNEHAKLSMLRNATWTLSNFCRGKPQPAFDQTKPALPALARLIHSNDEEVLTDACWALSYLSDGTNDKIQSVIDAGVCPRLVELLLHPSPSVLIPALRTVGNIVTGDDSQTQCIIDHQALACLLSLLTQNHKKSIKKEACWTVSNITAGNKDQIQAVINAGIIGPLVHLLQTAEFDIKKEAAWAISNATSGGSH…	17718.2	36449.5	40850	35907.4	32731.3	24391	32057.6	26215.3	30870.6	28383.6	14988.7	23031.3	20145	22969	20283.5	16972.2	17047.7	13635.6	16522.2	16044.4	19996.5	15700	30516	11817.9	19507.6
Bradi2g09070.1	0.0227191	0.0318919	0.824654	0.136019	0.00843415	0.152389	0.00843415	0.913885	0.619575	0.913885	0.771988	0.619575	0.778918	MFLVDWFYGVLASLGLWQKEAKILFLGLDNAGKTTLLHMLKDERLVQHQPTQYPTSEELSIGQIKFKTFDLGGHQIARRVWKDYYAKVDAVVYLVDAADKERFAESKKELDGLLSDDSLAKVPFLVLGNKIDIPIAASEEELRYYLGLSNFTTGKGNVNLSDSNVRPLEVFMCSIVRKMGYGEGFKWMSQYIK	73741	110211	125077	107622	104163	68484.7	107354	95001.9	109931	95192.7	72394.8	101737	69223.1	78294.3	80412.3	74892.2	54227.9	61380.5	67645.8	64536.6	73548.8	75655.4	89228.5	86104.1	81134.2
Bradi2g09120.1	0.00152985	0.00308026	0.0784669	0.00794594	0.00217113	0.000751326	0.000751326	0.598049	0.204688	0.598049	0.407225	0.303368	0.204688	MSFQDLEAGNGPRGAPRRNGRSAAGAGAGASQAVASGVFQINTAVATFQRLVNTLGTPKDTPDLRDRIHKTRAHITQLVKDTSDKLRQASEADHRVEVSATKKIADAKLAKDFQAVLKEFQKAQRLSAEREAAYAPFITQAGLPQSYNSTDMNNGADKLAEQRTQLLESRRQELVFLDNEIVFNEAIIEERDQGIQEIQHQITEVNEIFKDLAVLVHDQGAMIDDIDSHIDNSVAATAQAKGQLSKAAKTQKSNSSLICLLMVIFGVVLLIVIIVLAA	8917.43	6857.11	3856.91	4413.14	6011.15	3769.81	3104.29	3745.19	3760.55	3594.96	3740.2	1912.48	2608.93	1529.95	2447.89	1424.1	1603.4	3902.9	363.97	1823.59	829.91	541.029	2436.61	1114.08	1230.41
Bradi2g09470.1	0.00014497	0.000391128	0.564963	0.0487936	0.000271044	0.000182009	0.000182009	0.867327	0.407449	0.867327	0.704034	0.422439	0.407449	MDGGGGVGGGMAGPVGGGMVGPVGVGVGGGGGGGSDVELVSKTLQFEHKLFYFDLKENPRGRYLKISEKTSTTRSTIIVPIAGVAWFLDLFDYYIRTDERDVFSKELRLDTKVFYFDIGENKRGRYLKVSEASVNRNRSTIIVPAGSSGEEGWEAFRNVLLEISDEASRLYVLPNHPSQQHLEPPERLPGLSDDVGAGFIAGHASQSASGPEVDVERLVDVPPIEEFSGMGLSKVIRADQKRFFFDLGSNNRGHYLRISEVAGADRSSIILPLSGLKQFHEMVGHFVDIMKDRLEGMTGANVRTVEPSQR	23614.9	33852.2	31321.9	26656.1	28861.3	21071	23620.4	34006.5	21430.8	25032.2	23230.9	14551.1	24254.6	19240.7	20319.3	17941.7	11023.3	8059.53	11744	12192.1	13178	12835	10121.6	10903.5	11759.5
Bradi2g09950.1	1.64133e-05	6.37156e-05	0.350376	4.66067e-05	3.83429e-05	0.000127329	3.83429e-05	0.872083	0.496022	0.872083	0.509208	0.496022	0.531381	MERLQRIFGAGGMGQPPSDSPLLDSSEQVYISSLALLKMLKHGRAGVPMEVMGLMLGEFVDDYTVRVVDVFAMPQSGTGVSVEAVDHVFQTNMLDMLKQTGRPEMVVGWYHSHPGFGCWLSGVDINTQQSFEALNPRAVAVVIDPIQSVKGKVVIDAFRLINPQTMMLGQEPRQTTSNVGHLNKPSIQALIHGLNRHYYSIAINYRKNELEEKMLLNLHKKKWTDGLILKRFDTHSTTNEQTVQEMLSLAIKYNKAVQEEDELSPEKLAIANVGRQDAKKHLEEHVSNLMSSNIVQTLGTMLDTVVF	20810.7	31551.2	28992.5	23231.4	26146.4	21343.2	20822.8	26651.4	22390	22801.9	11705.4	15753.7	12650.5	13146.3	13314	11158.6	14848.3	12095.9	13774	12969.2	14756.7	14457.7	10236.6	16123.7	13893.7
Bradi2g10970.1	0.000900886	0.00192598	0.116805	0.58153	0.000268789	0.00979637	0.000268789	0.794119	0.0958501	0.612189	0.794119	0.0958501	0.391096	MREILHIQGGQCGNQIGSKFWEVVCDEHGIDPTGRYVGTSDLQLERVNVYYNEASCGRFVPRAVLMDLEPGTMDSVRTGPYGQIFRPDNFVFGQSGAGNNWAKGHYTEGAELIDSVLDVVRKEAENCDCLQGFQVCHSLGGGTGSGMGTLLISKIREEYPDRMMLTFSVFPSPKVSDTVVEPYNATLSVHQLVENADECMVLDNEALYDICFRTLKLTTPSFGDLNHLISATMSGVTCCLRFPGQLNSDLRKLAVNLIPFPRLHFFMVGFAPLTSRGSQMYRALTVPELTQQMWDSKNMMCAADPRHGRYLTASAMFRGKMSTKEVDEQMINVQNKNSSYFVEWIPHNVKSSVCDIPPRGLSMASTFVGNSTSIQEMFRRVSEQFTAMFRRKAFLHWYT…	16407.3	26528.4	53332	42954.5	34805.5	16041.8	29370.2	19481.1	20337.3	21307.6	22528.9	34412.4	31303	22314.6	27639.7	4481.52	1202.29	4050.77	3609.89	3336.12	10597.3	17066	15455.1	11330.8	13612.3
Bradi2g11480.1	3.13962e-05	0.000111457	0.000522022	0.000108154	1.60571e-05	3.60073e-05	1.60571e-05	0.717358	0.625844	0.717358	0.669609	0.630992	0.625844	MATGQIFSKTTQALFYNYKQLPIQRMLDFDFLCGRETPSVAGIINPGSDGFQKLFFGQEEIAIPVHPTIEAACNAHPTADVFINFASFRSAAASSMSALKQPTIRVVAIIAEGVPESDAKQLISYARANNKVIIGPATVGGVQAGAFKIGDTAGTIDNIIQCKLYRPGSVGFVSKSGGMSNELYSTIARVTDGIYEGIAIGGDVFPGSTLSDHILRFNNIPQVKMMVVLGELGGSDEYSLVEALKQGKVQKPVVAWVSGTCARLFKSEVQFGHAGAKSGGELESAQAKNQALRDAGAVVPTSFEALESVIKETFDKLVEAGNIPPVAEITPPPIPEDLKTAIKSGKVRAPTHIISTISDDRGEEPCYAGVPMSTIIERGYGVGDVISLLWFKRSLPRYC…	943649	1.14864e+06	1.13787e+06	908815	1.03474e+06	647613	721835	748725	850950	742281	701593	608302	709014	752585	692873	648655	758517	614157	590330	652915	615517	654481	691398	628955	647588
Bradi2g11510.1	1.84451e-05	7.00912e-05	9.2015e-05	7.83033e-05	1.54811e-05	9.40011e-06	9.40011e-06	0.27371	0.134496	0.27371	0.255624	0.202128	0.134496	MAPLAPSAGARLLRRLLTTAAEVAPEAAPPVTKNARKAAHPIGKKVPSDTAQPVPKVASEAAHPVAVDANKAVTKDSRPLYRRLSALGNAGEGSVSRVLNKWVREGREARSVDLERYVKELRKYKRHAQALELMDWMVHTKGMNMSYTNHAIRLDLVYKVRGIEAAEKYFNGLPDPAKNHRTYGALLNCYCSSKKEEKATDLFHKMDDLGIASSTLPFNNLMSLYMKLGQHKKVAGLFEEMKAKNVKPDNLTCCVLMTSYAALNKIDAVEEVLKEMEEKNAALGWSAYSTLASIYVSAGLVEKAESALKKLEGLVQPRDGRQPFDFLMSLYASVGNLSEVNRVWDVVKATFPKVTNTSYFSMLQALYKLNDADRIKQIFEEWESNHECYDVKLTNIMTR…	691607	1.84202e+06	1.7719e+06	1.93366e+06	1.5598e+06	502852	460324	343528	401023	426932	372964	387835	462923	371165	398722	416855	262215	316882	265166	315279	156322	149685	321734	211403	209786
Bradi2g11920.1	6.72938e-06	3.15206e-05	0.0858847	0.00467039	7.9941e-06	2.11793e-06	2.11793e-06	0.75047	0.236507	0.75047	0.597105	0.264825	0.236507	MDPTLFIIGIIGNIISVLVFISPVTTFWRIVRGGSTEEFEPAPYVMTLLNALLWLYYGLTKPDGLLIATVNGFGALMEAIYVVLFLIYANDHGTRVKTAKLVAALDIAFFGVVFATTTFAIAELDMKIMVVGLICACLSVFMYGSPLAAMRTVITTRSVEYMPFFLSFFLFLNGGVWAFYALLDRDVFLGVPNGFGCVLGGIQLIIYAVYKNCKVDSPSSDEAADDGWQAAASASLLSSSDANRHGLEDAASNRV	19068.1	26197.1	24861.3	17282	21852.1	18717.6	10883	16961.9	19035	16399.4	10411.4	11554.8	12059.9	18166.1	13048	7571.69	6268.07	4997.98	4310.22	5786.99	4969.21	2972.41	6218.18	6512.98	5168.19
Bradi2g12160.1	0.00168832	0.00335922	0.0261922	0.001954	0.299511	0.00118599	0.00118599	0.844629	0.581497	0.72018	0.599244	0.844629	0.581497	MAAETFLFTSESVNEGHPDKLCDQVSDAVLDACLAQDADSKVACETCTKTNMVMVFGEITTKATVDYEKIVRDTCRNIGFISDDVGLDADRCKVLVNIEQQSPDIAQGVHGHFTKRPEDIGAGDQGIMFGYATDETPELMPLSHVLATKLGARLTEVRKNGTCAWLRPDGKTQVTVEYLNEGGAMVPVRVHTVLISTQHDETVTNDEIAADLKEHVIKPVIPEKYLDEKTIFHLNPSGRFVIGGPHGDAGLTGRKIIIDTYGGWGAHGGGAFSGKDPTKVDRSGAYIARQAAKSIIASGLARRCIVQISYAIGVPEPLSVFVDSYGTGTIPDKEILKIVKENFDFRPGMISINLDLKKGGNRFIKTAAYGHFGRDDADFTWEVVKPLKFDKASA	149753	165634	157935	132892	151554	102685	120448	102446	111005	109146	82511.8	113975	79674.6	87109	90817.5	170436	126371	130138	85081.4	128007	90024.9	68769.5	99726.2	93991.3	88128
Bradi2g13110.1	0.0132745	0.0201659	0.106184	0.0268683	0.0136552	0.941379	0.0136552	0.926777	0.566214	0.702948	0.609291	0.566214	0.926777	MAPVKVFGPAMSTNVARVLVCLEEVGAEYEVVNIDFQAQEHKSPEHLVRNPFGQIPAFQDGDLLLFESRAISKYVLRKYKTDKVDLLREGNLKEAAMVDVWTEVDAHTYNPALSPIVYECLINPMMRGIPTNQKVVDESLEKLKKVLEVYEAHLSKHKYLAGDFISFADLNHFPYTFYFMGTPHAALFDSYPHVKAWWERIMARPSVQKLGASMVPPKA	71825.6	119830	156728	140390	122194	60548.8	77113.3	108114	97806.6	85895.7	71717.1	75789.3	59116.2	91183.1	74451.5	40466.4	67775.4	84237.8	84271.2	69187.7	116301	108641	120461	107581	113246
Bradi2g13236.1	0.000214041	0.000547895	0.998955	0.490309	0.0331777	0.00169553	0.00169553	1.19782	0.352068	0.971916	1.19782	0.568047	0.352068	MSLHLPLLFLLAVFLFPTSLHSQPTSPPPPARCPLNFTALRPFLGPQQPPSDDASRCALALQSVRLLLSLHLAATGSFLVPAADASSSCLPPLRAALPFQLPPPDACGLGGLDALLSAPGCSNVSTLADFDRLVPASARRDINASCDRELGPVPVCTACTTSLSKAAAAYLLPGSPDGGNNVTGCVQYPFIYAGAAASPRGPDDPDTAFCLYLLSASSGSIGGSGAPGWLYGVVFGCIGFVLVVAAAAGSWFLLRRHRRRAAAAALAAARADSRSKRSQAMESISASTTLVKFTYDEIKTATGGFTRESLIGRGGFGNVYQGVLPDGTEVAVKRFKNCSAAGDSAFAHEVEVVASVRHVNLVTLRGYCIATTQREGHQRMIVCDLMHNGSLHDHLFSSG…	24205.2	36667.1	45701.2	31062.4	34409	37230.8	31987.4	28936.4	35615.8	33442.6	35497.1	38672.6	49004.9	41688.3	41215.7	21050.1	13601.8	26922.5	16609.2	19545.9	18623.2	8863.73	20936.1	34.1282	12114.3
Bradi2g13450.1	0.000182844	0.000479878	0.107312	0.000194679	0.00138533	0.000177029	0.000177029	0.800906	0.52447	0.800906	0.52447	0.607243	0.526736	MSSAAAIGAGKAVCVTGASGYIASWLVKLLLARGYTVRATVRDTDDPKKTLHLHALDGAKDRLHLFKASLLEEGSFDAAIAGSECVFHTASPFYHNVKDPKAELLDPAVEGTLNVLRSCKKASIKRVVVTSSMAAVAYNEKPRTPDVVVDETWFSHPELCEKNQQWYVLSKTLAEDAAWKFSKDNGFEMVTINPAMVIGPLLQPTLNTSAEVILKLINGSSSTYPNFSFGWINVKDVALAHILAYEVPSANGRYCMVERVAHHSEILKIIHELYPNLPVPDKCADDGPFVPTYQVSKDKIRSLGLQLIPLETSIKETIESLKEKGFLSL	34825.5	52551.8	42846.9	44422.1	43661.6	27703.4	42959.9	28005.5	41206.4	34968.8	20861.5	26487.2	19261.2	24986.8	22899.2	25582.8	24494	26316.3	29659.6	26513.2	20860.1	25158.1	22192.8	23781.5	22998.1
Bradi2g14210.1	0.00345585	0.00623254	0.95903	0.205295	0.0121703	0.0279731	0.0121703	1.06932	0.532691	1.06932	0.738217	0.532691	0.591057	MSASSKLCQSACKAARSLLSSASAPRSSVLADGRNAALATLTNLGRSKLPAAYSYHKAGGAAAASSTHAYMLQDQEAHAAEMERTFIAIKPDGVQRGLISEIVSRFERKGFKLVAIKLVVPSKEFAQKHYHDLKERPFFSGLCDFLSSGPVLAMVWEGEGVIKYGRKLIGATDPQKSEPGTIRGDLAVVVGRNIIHGSDGPETAKDEIALWFQPKELVSYTSNEEKWVYGVN	15574.8	22850.9	14439.7	12822	16421.9	14427.9	16528.8	17059.6	22224.9	17560.3	10558	16254.9	10692.2	10986.4	12122.9	10463.4	6148.35	8132.78	10246.6	8747.78	11290	5921.68	11599.1	10014.3	9706.26
Bradi2g14400.1	6.56378e-05	0.000204022	0.999822	0.0101218	0.000328225	0.000677464	0.000328225	0.987537	0.437066	0.987537	0.638056	0.437066	0.493042	MATRYWIASLPVQSAGGGDSSAKSALWARLQDSISRHSFDTPLYRFNVPDLRPGTLDSLLALSDDLVKSNIFIEGVSHKIRRQVEDLERAGGVEGGALTVDGVPVDSYLTRFVWDEGKYPPHGPLKETVASIQSQVAKIEDDMKVRVAEYTNVKSQLSAINRKQTGSLAVRDLSNLIKPEDMVTSEHLVTLLAIVPKYSQKDWLASYESLDTFVVPRSSKRLYEDNEYALYTVTLFAKVVDNFKVHAREKGFQIRDFEYSPEAQESRKQELEKLLQDQELMRTSLLQWCYASYSEVFSSWMHFCAVRVFVESILRYGLPPNFLSVVLAPSTKSEKKVRNILEGLCGSSNSNNYWKQDDDVGVAGLGGDTESHPYVSFTINFV	635474	1.18454e+06	1.16667e+06	948829	983880	1.01632e+06	929402	974738	966014	971617	513396	556473	591166	850046	627770	517106	512131	337189	353656	430020	483786	547125	450343	459122	485094
Bradi2g14580.1	2.23338e-05	8.22263e-05	0.0184448	7.46403e-05	1.06992e-05	0.000191464	1.06992e-05	0.711072	0.383729	0.711072	0.445198	0.383729	0.456698	MGGGDASGLGAGPEREQEEEQARKRAAAAGYDYEGDARWAEYWSNVLVPPHLASRPDVVGHLQRKFYQRYIDRDLVVEPMSSIGSTQASRPEVRSSSSASSESVRPRNSGSSSRSAAPPPPPPQTDRAANPLRFDARTIHFSINAWVLVVAGLGMLPILPKHLADRACKLSLLGTILSSGYSLYSTYGKPRALNMQAIQGWLNSVLGTKDFIHLMFSLLLFTSQLHLKIAALPVFCWALDHVARFLRRNFTHSSFYRAYLEEPCLWVETNNTTLSLLSSNAELALGFLLIISLFSYSTSAFLRITNIIFRPSSLHLMSYTLLSCRWRRNIIQTFMYWNLLKLMYRAPVTSSYHQSTWAKIGRTVNPYIHRYAPFLQTPISTIQRWWLR	20431.3	24500.8	23737.7	16060	21182.4	9751.57	15584.6	16179.3	18733.5	15062.2	8414.08	8497.6	10156.4	10653.4	9430.38	6761.95	8494.15	8676.85	8580.33	8128.32	7378.39	10493.8	8665.22	12158.5	9673.97
Bradi2g15367.1	0.000254642	0.000639687	0.913168	0.022113	0.00121738	0.000341215	0.000341215	0.893254	0.136805	0.893254	0.482072	0.248237	0.136805	MHREISDMVYFLDEARVYDRMPVTMAMADAVNDTSAPTTKRLTISFEETETTQWDATLELTLGYTATMKVGFPKLGLGAQAELSAEFFGSYNWGETVVTTVKKAVEYEVTVPPRTKVSVRVMATKATCDVPFGYIQKDTFTDGRVETRRKQDGIFTGVNSYNFQFHATEMPLEQRLIMQQHAS	6548.45	18847.9	14671.7	10236.5	12576.1	9188.37	11418.5	9905.13	14422.7	11233.7	6458.05	3494.69	5529.78	8767.94	6062.61	4109.64	1721.38	1255.61	5400.85	3121.87	2567.18	844.471	1669.97	1800.29	1720.48
Bradi2g15740.1	0.000559753	0.00127122	0.999996	0.0496957	0.00205776	0.00299548	0.00205776	1.0074	0.317426	1.0074	0.570889	0.317426	0.34856	MRSSLLRSASQHLRRRGYASAAGGQPERKVAILGAAGGIGQPLALLMKLNPLVSSLSLYDIAATPGVAADVSHINSPALVKGFVGDDQLGEALEGADLVIIPAGVPRKPGMTRDDLFKINAGIVKGLCTAISKYCPNALVNMISNPVNSTVPIAAEVFKKAGTYDEKKLFGVTTLDVVRAKTFYAGKANVPVTGVNVPVVGGHAGITILPLFSQATPSSNALSHEDLKALTKRTQDGGTEVVEAKAGKGSATLSMAYAGAVFGDACLKGLNGVPDIIECSFVQSTVTDLPFFASKVRLGKNGVEEVIGLGELSAFEKEGLESLKGELMSSIEKGIKFAQEN	67444.1	179615	105522	89751.2	110583	102625	122014	109998	110968	111401	52855.2	45154.4	79709.4	74803.6	63130.7	29690.5	23461.1	53215.1	34041.3	35102	31424.5	52754.1	44314.9	25685.7	38544.8
Bradi2g16070.1	0.000123698	0.000340549	0.0791673	0.00163565	0.000238286	5.6607e-05	5.6607e-05	0.703551	0.270218	0.703551	0.464682	0.35217	0.270218	MNGNSSSRGGGGYESGSDQDGGMRKPLLVNTGSWYRMGMGSRQSSLTAGTSSMAVMRESHVSAFLCTLIVALGPIQFGFTGGFSSPTQDAIIRDLNLSISEFSVFGSLSNVGAMVGAIASGQMAEYIGRKGSLMIAAIPNIIGWLAISFAKDSSFLYMGRLLEGFGVGVISYTVPVYIAEISPQNMRGALGSVNQLSVTIGILLAYLLGMFVPWRMLAVIGILPCTILIPGLFFIPESPRWLAKMNKMEDFETSLQVLRGFETDITSEVNDIKRAVTSANKRTTIRFHELNQKKFRTPLTLGIGLLVLQQLSGINAILFYASSIFKAAGLTNSDLATCALGAIQVVATGVTTWLLDRAGRRILLIISSAGMTLSLLAVAVVFFFKDNVSQDSHMYYILS…	29492.2	38097.1	46596.9	23055.5	34310.4	27419.5	22734.8	18284.5	28117.6	24139.1	14246.3	14681.1	13658.4	21187.9	15943.4	17515.8	14152.8	10500.4	6163.53	12083.1	9771.65	10208.1	11214.5	5890.77	9271.27
Bradi2g16430.1	8.76529e-09	2.02789e-07	4.36588e-05	2.81315e-09	1.73805e-12	3.72947e-10	1.73805e-12	0.708393	0.395739	0.708393	0.523802	0.395739	0.445736	MVAHRFHQYQVVGRALPTPGDEQPKIYRMKLWATNEVRAKSKFWYFLRKLKKVKKSNGQMLAINEIFEKNPTTIKNYGIWLRYQSRTGYHNMYKEYRDTTLNGAVEQMYTEMASRHRVRSPCIQIIKTATVHFSLCKRDNTKQFHNSKIKFPLVYQKVRPPTRKLKTTYKATRPNLFM	206151	216518	195908	166516	196273	121411	138346	145276	151122	139039	103935	113071	89544.4	104683	102808	78704.8	79364.8	75253.9	77368.7	77673	102505	76397.7	84565.5	86476.1	87486
Bradi2g16500.1	0.0363463	0.0488845	0.488546	0.0330395	0.0379096	0.0402273	0.0330395	0.76149	0.479664	0.76149	0.479664	0.492389	0.497884	MERVMKDDTIQEKGERARMASFVGAMAIADLVKTTLGPKGMDKILQSTGRGRSVTVTNDGATILKSLHIDNPAAKVLVDISKVQDDEVGDGTTSVVVLAGELLREAEKLVNMKIHPMTIIAGYRMAAECARNALLQRTMDNKGNTDKFRSDLMNIAMTTLSSKILSQDKEYFAELAVDAVLRLKGSTNLESIQILKKPGGSLKDSFLDEGFILDKKIGLGQPKRIENANILVANTAMDTDKVKIYGARVRVDSMTKVADIEAAEKQKMREKVQKIIAHGINCFVNRQLIYNFPEELFADAGILAVEHADFEGIERLALVTGGDIASTFDNPESVKLGHCKLIEEIMIGEDRLIHFSGVAMGQACTIVLRGASEHVLDEAERSLHDALCVLSQTVNDTRV…	39980.1	50931.5	46767.3	46111.9	45947.7	24040.9	33889.7	41829.9	40194.4	34988.7	24333.8	32942.3	23924.4	6957.38	22039.5	21427.1	7290.81	28580.4	33198.3	22624.1	28710.3	45691.2	11509	5595.91	22876.6
Bradi2g16560.1	3.29475e-06	1.89547e-05	0.100367	0.659494	0.000222512	0.00296378	0.000222512	1.13761	0.642628	1.13761	0.936472	0.642628	0.755168	MAPPSRVLLLAALFLAASTMATAQKAKAKPAPAAADGPGAAAADAGPPTNVTSVLEKSGKYGTFLRLLHETRVDTQLNSQLYDSYNGLTILAPTDAAFEDLPSGTMNGLSSQDQIQMMLYCVLPRFYSLSMLGTLNGKVSTQASGSDGPYEYKIKPSGSNVNVSTGVKGNNMLLSTIVSKEFPLAVYSVDKVPLPYALFGPQPPTPAPAPAPAPSKSKSKKKKKVIADPPESDSDDSTASDTKSAAAARVSASRWVAAAALAVLGAAGGVLL	1.33244e+06	1.26046e+06	1.69618e+06	1.46203e+06	1.43778e+06	1.63257e+06	1.5829e+06	1.61394e+06	1.71313e+06	1.63563e+06	1.3602e+06	1.27628e+06	1.26956e+06	1.47972e+06	1.34644e+06	918153	855197	949935	972541	923956	1.2421e+06	910459	1.11917e+06	1.07133e+06	1.08576e+06
Bradi2g16570.1	1.16216e-07	1.47901e-06	0.0207243	0.527982	3.23781e-05	1.47362e-05	1.47362e-05	1.25096	0.454456	1.25096	0.898501	0.454456	0.48578	MATARSVLVAVLLSLALPAVLSQKPAAAPAPSPASTAPNVTAVLDKAGQYTKFMRLMKSTQQDTQLNSQLNGSDTGFTVFAPTDNAFDSLKAGTLNSLSQQEQVSLVQAHIVPAFFSMESFETASNPVRTQASGADGPYTVNVTATSNGQVNVSTGLVSTMVGTALRKEKPLAVYSVDKVLLPYDLFGPKPPASAPPAPGKKAPAKGGAKAPAGEEDSAPASKASGGVVGFAWSFLAAVAAACLL	386971	597485	537429	534485	514092	647783	603254	616628	704770	643109	406554	413712	479246	548139	461913	252711	211694	212074	258051	233632	271072	194540	271988	261344	249736
Bradi2g17040.1	0.000642055	0.00142691	0.0181057	0.0319751	0.000442039	0.000313914	0.000313914	0.645688	0.367605	0.611852	0.645688	0.394527	0.367605	MTKRTKKAGIVGKYGTRYGASLRKQIKKMEVSQHSKYFCEFCGKFAVKRKAVGIWGCKDCGKVKAGGAYTMNTASAVTVRSTIRRLREQTEA	9623.61	11051.7	17904.6	13702.5	13070.6	5629.09	8702.92	7543.19	10113.9	7997.26	9953.22	9157.3	5990.4	8657.17	8439.52	5028.85	7761.87	3644.11	4191.98	5156.7	3425.92	5014.52	4560.85	6217.96	4804.81
Bradi2g17290.1	0.00201097	0.00389211	0.94959	0.0538442	0.00810304	0.0021822	0.0021822	0.914528	0.329191	0.914528	0.57978	0.429205	0.329191	MATRRALSSLLRSASRVRGASPSPLPRAAPHRPSPAGYLFNRAAAYATSAAAQSKPTTTPPPTSAGKTGPGKITDEFTGAGAVGQVCQVIGAVVDVRFDEGLPPILTALEVLDNSIRLVLEVAQHLGENVVRTIAMDGTEGLVRGQRVLNTGSPITVPVGRATLGRIINVIGEPIDERGDIKTNHFLPIHREAPAFVEQATEQQILVTGIKVVDLLAPYQRGGKIGLFGGAGVGKTVLIMELINNVAKAHGGFSVFAGVGERTREGNDLYREMIESGVIKLGDKQSESKCALVYGQMNEPPGARARVGLTGLTVAEHFRDAEGQDVLLFIDNIFRFTQANSEVSALLGRIPSAVGYQPTLATDLGGLQERITTTKKGSITSVQAIYVPADDLTDPAPAT…	311181	615784	325111	241431	373377	316062	355945	336971	356876	341464	192102	150662	270815	252326	216476	144722	90419.9	194973	210906	160255	100274	123903	125210	142261	122912
Bradi2g17810.1	3.74353e-05	0.000128731	0.617731	0.00139966	4.69302e-05	8.58969e-05	4.69302e-05	0.827712	0.102315	0.827712	0.31937	0.102315	0.129312	MDANRRQSGIQQLLAAEQEAQQIVNAARAAKLARLRQAKEEAEREIAEYRAQMEAEFQRKVAESSGDSGANVKRLEQETNEKIAQLKQQAATISPEVIQMLLRHVTTVKN	16207.8	18900	13195.2	7369.06	13918	16155	8819.07	12863.5	8242.92	11520.1	3494.36	4720.82	2533	7031.85	4445.01	1535.01	2626.34	680.307	854.445	1424.02	2357.83	1389.74	789.445	2662.06	1799.77
Bradi2g18330.1	1.90271e-06	1.27067e-05	0.274554	0.00110792	2.00614e-06	6.54081e-06	2.00614e-06	0.910894	0.589875	0.910894	0.765556	0.622008	0.589875	MSEEGKDALDLSAISAAVPNAAELSAEDKANLVESIKNTLQGLAAQHSDVLENLEPKVRKRVEALREIQSQHDELEAKFFEERAALEAKYLKMYEPLYSKRYEVVNGVVEVEGVTKDEAAVTAADQKEEKGVPDFWLNAMKNHEILAEEIQERDEEALKYLKDIKWYRINEPKGFKLEFHFDTNPFFKNSVLTKTYHMIDEDEPILEKAIGTEIEWYPGKCLTQKVLKKKPKKGSKNTKPITKTEMCDSFFNFFTPPQVPDDDEEIDEDTAEQLQNQMEQDYDIGSTIRDKIIPHAVSWFTGEAAQDEDFDGIMDGEDDDDEDDDEDEDEDEDDEEDEDDEGDKKKGGRVPAGEGQQGERPAECKQQ	225600	240649	261616	199310	231794	198621	204811	224138	216989	211140	160536	189811	161138	198319	177451	138545	154357	150813	132995	144177	131839	132386	150078	132615	136729
Bradi2g18640.2	0.00680067	0.0111201	0.535889	0.178868	0.00248787	0.0220782	0.00248787	0.824155	0.414465	0.824155	0.720854	0.414465	0.565474	MGKSPAKWLKSVLFGKKTSKSGSTKGKDLSKAPGNRGYAATGKDPVFSESSPVISEPVLVTPHNNDTVPEVRKAENSSLQGEVVVPDVNQDLEKQSTVGSDVLSNDPERLREEQAAVKAQAAFRGYLARRAFRALKGIIRLQALIRGHLVRRQAASTLRATWLIVKFQAVVRGRNVRLSSDAVQFRWNLVQQNSMGAKPDAWKERLASNAFARKLLASPILVEALHFQYDERDPNSAFNWLERWTISRVWKPVYQPKRSAASDAKAQTRKASYAMETESGKLKRNARKSSAMSVEPAPTNMPLETEKPRRNQRKFTSIPADSVPDSQLTELEKVKRSLRKVTNSMAEASKVSSPATEISDYPEVQFEKPVRTAQEVPVYPEIQEPYNGDLLENAKMDIP…	18761.5	16471.7	17002.7	12306.4	16135.6	11774.6	12820.9	13887.4	14709.9	13298.2	8683.18	9149.59	14300.9	14391.9	11631.4	7689.78	4211.99	9177.97	5670.78	6687.63	16683.5	6762.56	7331.49	5719.54	9124.26
Bradi2g19230.1	0.000117541	0.000326932	0.0637537	0.00281401	4.1861e-05	0.000554819	4.1861e-05	0.83292	0.57752	0.83292	0.729516	0.57752	0.683868	MAEHKEESVMDKISEKLHGGSSSGSDDESSSAAAAVKAKIYRLFGREKPVHSVLGGGKPADLFLWRNKKISGGVLAGATAIWLLFEVMEYHLLTLLCHCFILTLGILFLWSNASAFINKSPPNIPEVRIPEDLAVNVARSLRYEINRGFASLRDIGQGRDLKKFLIVIAGLWTLSALGSSCNFLTLFYIVFMVLYTVPVLYEKYEDKIDAYGEKAMIELKKYYAIFDEKCLSKIPKGPSKDKKH	140692	142600	160821	121618	141433	90350.3	117587	123930	139342	117802	91621.7	110554	106263	104271	103178	81240.3	87442.2	77085.6	80953.3	81680.3	101048	106141	91123.2	88573.7	96721.4
Bradi2g19750.2	0.00190656	0.0037167	0.425715	0.104698	0.00563446	0.000905888	0.000905888	0.850795	0.508976	0.850795	0.761013	0.605436	0.508976	MASRRRTLLKVIILGDSGVGKTSLMNQYVNKKFSNQYKATIGADFLTKEVQFEDRLFTLQIWDTAGQERFQSLGVAFYRGADCCVLVYDVNSMKSFDNLNNWREEFLIQASPSDPDNFPFVLLGNKVDVDGGNSRVVSEKKAKAWCASKGNIPYFETSAKDGLNVEEAFQCIVKNALKNEPEEELYVPDTVDVVGGNRGQGSSGCC	32489.3	46336	52826.8	44922.2	44143.6	37357.7	44982.3	26188.4	41700.1	37557.1	28346.4	41270.3	31005.8	33752.9	33593.8	26755.7	33598.5	26163.5	20386.8	26726.1	19064	23426.2	24066.5	23315.4	22468
Bradi2g20200.1	0.0066888	0.0109858	0.905198	0.111782	0.00684582	0.0133353	0.00684582	0.891983	0.394495	0.891983	0.62797	0.394495	0.448526	MDSARSWFQKFQPRDKSKSPAVPASHGKDPGKPPMDDAPSSATKQKVAAAKQYIENHYKTQMKSLQDRKERRWMLERKLQDAEVPVEEQNNILKHLEKKETEYMRLQRHKMGVEDFELLTIIGRGAFGEVRLCREKTSKSVYAMKKLKKSEMLRRGQVEHVKAERNLLAEVDSAYIVKLYYSFQDDEYLYLIMEYLPGGDMMTLLMRKDTLTEEEAKFYIAETVLAIESIHKHNYIHRDIKPDNLLLDLSGHLKLSDFGLCKPLDSSNFPNLNEPDYTSGKGAKPLPDNTSRLTNSSAPKRTQQEQLSHWQKNRRMLAYSTVGTPDYIAPEVLLKKGYGMECDWWSLGAIMYEMLVGYPPFYSEDPMSTCRKIVNWRSHLKFPEEAKLSPETKDLISKL…	10248.8	44463.1	34911.9	29911.6	29883.8	23927.3	28839.2	29432.3	24424.7	26655.9	18597.7	21553.5	18712.5	16200.8	18766.1	11332.9	7237.01	14294	14292.1	11789	12455.6	15378.5	11525	14255.7	13403.7
Bradi2g20440.1	0.000215224	0.000549881	0.0707308	0.00385862	0.00023564	0.000149583	0.000149583	0.74935	0.437496	0.74935	0.602789	0.460125	0.437496	MAAAAGAAAGAAEVIAIHSLEEWTIQIEEANNAKKLVVIDFTASWCPPCRAMAPIFADLAKKFPHVAFLKVDVDELKPIAEQFSVEAMPTFLFMKEGDVRDRVVGAMKDDLTAKLGLHAAQ	7215.61	8234.87	7992.12	4484.51	6981.78	5872.76	4269.58	5318.12	5466.73	5231.8	3329.64	4810.19	3706.16	4988.16	4208.54	3846.55	3124.6	3475.17	2403.64	3212.49	2444.91	3240.15	3643.64	2889.29	3054.5
Bradi2g20680.1	9.55125e-05	0.000278888	0.0649532	0.000435146	0.000134673	0.000134769	0.000134673	0.681581	0.277467	0.681581	0.365526	0.294931	0.277467	MAATHPASPTAAGDKSSPSPPPPVRLATAVAAIQPSSPRFFFSSLAASSSPHRRIGIAVDLSDESAFAVKWAVQNYLRPGDAVVLLHVRPTSVLYGADWGSIPVSVDDDDGGEAPAGDEPEDARKKREEDFDTFTSTKSQDLAQPLVAAQIPFKIHIVKDHDMKERLCLEAERLGLSAMIMGSRGFGAFRRGDKGRLGSVSDYCVHHCVCPVVVVRYPDDAGAAGGAEAAGDELRTVPENEVVFHEAPEGQKEN	18387.4	28411.9	23482.1	12459.6	20685.3	13054.8	15017.8	13612.3	14709.8	14098.7	6956.12	6559.54	5888.11	10840.3	7561.01	9266.59	1673.36	6373.77	7089.23	6100.74	3862.15	6878.32	6557.97	5659.44	5739.47
Bradi2g21340.1	0.000997572	0.00209289	0.586288	0.860867	0.00134733	0.282534	0.00134733	1.1148	0.31537	0.818907	1.1148	0.31537	0.736791	MREILHIQGGQCGNQIGSKFWEVVCDEHGIDPTGRYVGTSDLQLERVNVYYNEASCGRFVPRAVLMDLEPGTMDSVRTGPYGQIFRPDNFVFGQSGAGNNWAKGHYTEGAELIDSVLDVVRKEAENCDCLQGFQVCHSLGGGTGSGMGTLLISKIREEYPDRMMLTFSVFPSPKVSDTVVEPYNATLSVHQLVENADECMVLDNEALYDICFRTLKLTTPSFGDLNHLISATMSGVTCCLRFPGQLNSDLRKLAVNLIPFPRLHFFMVGFAPLTSRGSQQYRSLTVPELTQQMWDSKNMMCAADPRHGRYLTASAMFRGKMSTKEVDEQMINVQNKNSSYFVEWIPNNVKSSVCDIAPRGLSMASTFIGNSTSIQEMFRRVSEQFTAMFRRKAFLHWYT…	14490.5	12150.4	22165.8	27412.9	19054.9	10749.6	14760.2	17439.2	19467.8	15604.2	21716.7	23352.2	20723.2	19177.4	21242.4	5485.15	4685.41	9228.32	4638.54	6009.35	15440.2	13112.2	17833.3	9772.13	14039.5
Bradi2g22180.1	0.000888971	0.00190655	0.878766	0.375671	0.012111	0.0397201	0.012111	1.37316	0.167866	0.825442	1.37316	0.167866	0.312859	MQHLRLIAFLSASLLFPLLPCTKGADLNSDKQALLAFAASLPHGKKINWTRTTQVCTSWVGVTCTPDGKRVRELRLPAIGLFGPIPSNILGKLDALQVLSLRSNRLTVGLPPDVASIPSLHSLYLQRNNLSGIIPTSLSSNLAFLDLSYNSFNGEIPLKVQNMTQLTGLLLQNNSLSGSIPDLQLTKLRYLDLSNNNFSGPIPPFLQKFPVNSFLGNSFLCGFPLEPCPGTTPPSPVSPSDKNNKNGFWNHTTIMIIIIAGGGVLLLILIIILLICIFKRKRDTEAGTASSSSKGKGVAGGRAEKSKQEFSSGVQEAERNKLVFYDGCSYNFDLEDLLRASAEVLGKGSYGTTYKAVLEDGTTVVVKRLKEVVAGKKDFEQQMEIIDRLGQDQSVVPLR…	7591.06	7748.05	13556.1	20213.8	12277.3	6416.37	14462.8	7687.99	11969.5	10134.2	13993	20331.3	19773.7	13336.5	16858.6	5985.61	711.205	1546.9	0.0373717	2060.94	440.848	714.44	9231.42	4977.52	3841.06
Bradi2g22430.1	0.00468552	0.00813484	0.681702	0.216037	0.00248217	0.0123844	0.00248217	0.862289	0.448982	0.862289	0.750325	0.448982	0.550414	MALNGNGNLKPDIQQIESTTSDNDPRATVINTPSTQGVPQPGNQSSGFLNFMNRFSSGSHLRKLGPSPSVKFRQLALERDDFSRSIHSDHHDSHEHFQLIRKINWGHLWAMGKDWIRQPLNMALFVWIVCVAVSGAILFLVMTGMLNHALPSKSQRDTWFEVNNQILNALFTLMCLYQHPMRIYNFVLLCRWDQMDILRLRKIYCKNGTYKPNEWMHMMVVVVLLNLNCFAQYALCGLNIGYRRSERPPLGVGVTISIAIGAVAFASVYNIVSPLGKDYDAEMREGDPEAQFEVTSTEGTRPATSRKSLEKRYSFLHSEERRFVESRPEWVGGLMEFWDSITIAYLSIFCSCCVFGWNVQRLGFGNMYVHIATFLLFCLAPFFIFNLAAVNINNENLRE…	14335	7983.3	7848.9	7312.46	9369.91	9063.55	7787.3	8678.72	6788.73	8079.58	6921.28	6573.4	6801.37	7825.88	7030.48	5475.82	3556.93	4519.84	3275.09	4206.92	5080.96	3704.34	6843.67	5000.36	5157.33
Bradi2g22480.1	0.00203881	0.00393471	0.0732624	0.0108483	0.00158984	0.00162434	0.00158984	0.605928	0.281484	0.605928	0.453487	0.300881	0.281484	MASAPTPPPLLPVTNPTAAGSAAASGGGGGGGSDAPIATPAFRLFLGRISDTARRSLSDRRPWGEMVDRSAFSRPDSVSDATSRLRRNLTYFRVNYTAIVAFALAASLLAHPFSLIILLGVLSAWCFLYLFRASDQPVTLFGRTFSDRETLLGLVGASFVAFFFTSVASLIISGMLVGAGIVAAHGAFRMPEDLFLDDTDAASGNSAAQGLLSFLGAPGSRV	4255	9100.64	10859.8	5897.86	7528.32	3437.32	5099.76	4775.54	4933.85	4561.62	2123.76	2880.14	2446.26	6205.82	3413.99	2316.78	2454.56	1932.11	2357.07	2265.13	2275.3	1244.81	1799.47	3156.82	2119.1
Bradi2g22670.1	3.83699e-06	2.11297e-05	0.0838668	0.415201	0.00161862	9.91701e-06	9.91701e-06	1.10277	0.526291	0.828972	1.10277	0.691022	0.526291	MAAASGAYAANLPAVPEWLNKGDNAWQLTAATFVGIQSMPGLVVLYGSIVKKKWAVNSAFMALYAYASSLLVWVLVGFRMAFGERLLPFWGKAGVALSQDYLVRRASLSATKHGSTPLTEPFYPEATLVLFQFEFAAITLILLAGSVLGRMNIKAWMAFTPLWLLLSYTVGAFSLWGGGFLYHWGVIDYSGGYVIHLSSGIAGFTAAYWVGPRLKSDRERFSPNNILLMIAGGGLLWMGWAGFNGGAPYAANIAASVAVLNTNVSAATSLLTWTCLDVIFFGKPSVIGAVQGMMTGLVCITPGAGLVQTWAAVIMGMFAGSVPWFTMMILHKKSALLMRVDDTLAVFHTHAVAGLLGGLLTGLLATPELMALESPVPGPRGAFYGGGIGQVGKQLAGAA…	16145.1	11263.8	15313.2	15942.1	14666.1	12711.4	13303.7	9739.68	12876.3	12157.8	16432.3	16186.3	16221.4	15853.1	16173.3	9400.48	9703.14	11104.5	10330.2	10134.6	8010.78	5837.16	9159.68	7866.86	7718.62
Bradi2g22750.1	4.5744e-05	0.000151247	0.243075	0.254086	0.000101369	9.51911e-05	9.51911e-05	0.804553	0.339161	0.801566	0.804553	0.371206	0.339161	MGNCCRSPAAAAREDVKSSHFPTSTGKKKPHQARNGGGAGGGGGGGGGGGGEKKLLSVLGEEGRDVSGGIDEKYALDRELGRGEFGVTYLCMDRGSKELLACKSISKRKLRTPVDVEDVRREVAIMRHLPKSPSIVTLREACEDDGAVHLVMELCEGGELFDRIVARGHYTERAAAAVTRTILEVVQLCHHHGVIHRDLKPENFLFANKKENSPLKAIDFGLSIFFKPGEKFSEIVGSPYYMAPEVLKRNYGPEIDIWSAGVILYILLCGVPPFWAETEQGVAQAILRGNIDFKREPWPQVSDNAKDLVRQMLQPDPKIRLTAKQVLEHTWLQNAKKAPNVPLGDIVKSRLKQFSRMNRFKRRALRVIADHLSAEEVEDIKDMFKVMDTDNDGIVSYEE…	16799.6	10955.1	15507.8	13593.9	14214.1	7593.18	11936.5	11874.4	14170.1	11393.5	12659.4	14382.3	9587.93	9114.35	11436	6220.97	3382.54	5615.74	5886.21	5276.36	6074.98	4233.52	5655.62	3319.31	4820.86
Bradi2g22897.1	7.54188e-07	6.20366e-06	0.00612418	5.11737e-06	1.97178e-08	1.35945e-05	1.97178e-08	0.756443	0.371634	0.756443	0.532221	0.371634	0.54884	MGKTRGMGAGRKLKTHRRNQRWADKAYKKSHLGNEWKKPFAGSSHAKGIVLEKIGIEAKQPNSAIRKCARVQLVKNGKKIAAFVPNDGCLNFIEENDEVLIAGFGRKGHAVGDIPGVRFKVVKVSGVSLLALFKEKKEKPRS	57324.7	59933.7	57463.7	51654.4	56594.1	33077.8	41181	52168.3	44813.8	42810.2	29521.1	31325.9	29219.6	30415.7	30120.6	22751.7	22805.3	16985.5	21586.8	21032.3	21851.5	30335.6	33701.3	38356	31061.1
Bradi2g23110.1	4.05197e-06	2.19523e-05	0.00382653	1.63503e-05	6.28874e-07	7.14829e-05	6.28874e-07	0.72897	0.459854	0.72897	0.535506	0.459854	0.522967	MVRVSVLNDALKSMYNAEKRGKRQVMIRPSSKVIIKFLIVMQKHGYIGEFEYVDDHRSGKIVVELNGRLNKCGVISPRFDVGVKEIEGWTARLLPSRQFGYIVLTTSAGIMDHEEARRKNVGGKVLGFFY	58993.6	66315.2	80173.9	70376.4	68964.8	38565.1	52843.7	49813.1	59871.2	50273.3	36234.3	34698.2	34860.2	41931.6	36931.1	39803	28504.6	30882	27665.5	31713.8	34163.6	32214.8	38924.9	38961.8	36066.3
Bradi2g23460.1	2.13193e-07	2.31934e-06	0.747423	4.77454e-05	3.75978e-06	1.55483e-05	3.75978e-06	0.934328	0.384634	0.934328	0.56627	0.430417	0.384634	MAESFVLNTGARIPSIGFGTWQIEPAVVGHTIYAAVKAGYRHIDCAPIYRNEKEVGLALKKLFEDGVVKREDMFITSKLWAGDHAPEDVPEAIDTTLKDLQLDYLDLFLIHGPIRIKKGTMPSPDNFLPPDIPATWGAMEKLYDSGKARAIGVSNFSCKKLEDLLSIARVPPAVNQVECHPIWQQYKLRKLCRSRGVHLSASSPLGSPASFGVSGANVLSNPIVISVAEKLGKTPAQVALRWGIQMGQSVLPKSAHEARIKENYDIFCWSIPEDLLAKFSDIKQARLLRAEFAVHPLSVYKTLEDLWDGEI	22349.2	26537.1	20080.5	17442.2	21602.2	18372.8	18567.5	21226.5	22567.5	20183.6	13634.1	12981.3	11764.3	10551	12232.7	8723.26	10471.1	9170.68	8826.83	9297.97	7875.35	7672.39	8222.85	9465.21	8308.95
Bradi2g23507.1	0.0106751	0.0165535	0.264505	0.359143	0.00548718	0.0118831	0.00548718	0.671106	0.200952	0.628683	0.671106	0.200952	0.27956	MASADPNRAFMKDVKRIIIKVGTAVITRNDGRLALGRIGALCEQVKDLNSQGYEVIMVTSGAVGVGRQRLRYRKLVNSSFADLQKPQNELDGKACAAVGQSGLMALYDMLFTQLDVSSSQLLVTDSDFDNSNFRERLCETVESLLELRVIPIFNENDAVSTRKAPYEDSSGIFWDNDSLAGLLALELKADLLVLLSDVDGLYSGPPSEPSSKIIHTYIKEIHYQEITFGDKSRVGRGGMTAKVQAASLASGGGIPVVITSGFDSQSIVKVLQGEKIGTLFHKNASLWEPSKDASVHEMAVAARDCSRRLQNLSSEERKKILFDVADALEANEDLIRSENEADIAAAQEAGYETSLVSRLTLKPGKIASLAKSIRTLANMEDPINEILKRTEVADGLVLE…	4481.41	9548.37	2586.94	3924.23	5135.24	3277.34	4029.83	2188.83	3417.75	3228.44	2903.79	4574.99	2322.59	3983.77	3446.29	645.082	763.005	1711.51	1008.14	1031.94	1227.18	1375.72	2227.23	912.303	1435.61
Bradi2g24070.1	1.64088e-06	1.11795e-05	4.53045e-06	0.203076	2.65288e-06	0.000234959	2.65288e-06	0.847153	0.350967	0.417974	0.847153	0.350967	0.56093	MADEDVQPIVCDNGTGMVKAGFAGDDAPRAVFPSIVGRPRHTGVMVGMGQKDAYVGDEAQAKRGILTLKYPIEHGIVNNWDDMEKIWHHTFYNELRVAPEDHPVLLTEAPLNPKANREKMTQIMFETFNCPAMYVAIQAVLSLYASGRTTGIVLDSGDGVSHTVPIYEGYTLPHAILRLDLAGRDLTDNLMKILTERGYSLTTTAEREIVRDIKEKLAYVALDYEQELETSKSSSSVEKSYEMPDGQVITIGSERFRCPEVLFQPSLVGMEAPGIHEATYNSIMKCDVDIRKDLYGNVVLSGGSTMFPGIADRMSKEITALAPSSMKVKVIAPPERKYSVWIGGSILASLSTFQQMWIAKAEYDESGPGIVHMKCF	5370.41	4273.69	5459.96	4077.02	4795.27	2095.3	1597.19	1833.71	2491	2004.3	5014.97	3701.21	3678.79	3854.34	4062.33	1992.39	1665.42	1925.52	1148.59	1682.98	2666.57	2074.9	3059.36	2958.42	2689.81
Bradi2g24430.1	0.0067093	0.0109974	0.0670818	0.881639	0.0221895	0.696828	0.0221895	1.10929	0.52031	0.608323	1.10929	0.52031	0.843081	MAEETKQETAAAAAELVATEAEKKAEVEEKVDEAAAAAAEEAEEEKKIEEAETEAGAEEAAVIEGSTGSFKEESNLVSELADPEQKALAQLKELIAAALASGEFDLPPPPPPVQPDTATPAADDAKTEEAEEPKAEEAAKSDAAPEGEEPKAEEAEVSEPKTEAPAPEEPKTDDPAQEEPKTVEPTKEEPNTEAPVVAAAEQPKAVAAAEEAKPAEPTPETEEKTVVVTEEEGTKAVEATEETAVPAASEPEAAPAAELIWGVPLVGDDERTDTVLLKFLRAREFKVKEAMAMLKAAVLWRKSFGIDALLGTDLGVPELENVVFYRGADREGHPVCYNVYSEFQDKELYEKAFGDDEKRERFLKWRIQLLERGILEQLDFSPSGICSMVQVTDLKNSPP…	361967	238018	327500	170157	274410	153303	194587	90588.3	229243	166930	282474	216877	346109	372140	304400	143032	116393	165059	146631	142779	252279	202488	268085	202549	231350
Bradi2g26040.1	3.25861e-06	1.89547e-05	0.001012	2.45193e-06	1.13814e-05	1.68323e-06	1.68323e-06	0.651468	0.369946	0.651468	0.451558	0.470761	0.369946	MASPQCCANPPTLNPAGGEGKVVDSFGGIRAYVAGAQESKAAVILVSDVFGFEAPNLRKIADKVALSGYFVVVPDFIHGDPYVPESVDKPIAVWIKEHAPEKAFEEAKPVIAALKKQGASSVGAAGYCWGAKVVVELAKANEIQAAVMLHPSFVTVDDIKEVKCPIAILGAEIDKMSPPEVVKQFEQVLSSNSGVGHFVKIFPGVAHGWTVRYNSDDASAVKSAEEALADMTSWFDQNLK	88820.8	129014	127047	102667	111887	58147.2	61591.3	81226.6	90598.4	72890.9	47366.8	51528.8	50145.3	53053.5	50523.6	52958.9	54832.6	42536.2	60361	52672.2	38660.5	37319	43700.3	45889.2	41392.2
Bradi2g26260.1	0.000412253	0.000972254	0.999527	0.0208296	0.00133585	0.00218437	0.00133585	0.973227	0.227033	0.973227	0.455872	0.227033	0.252623	MAAAAGAGRARGASLAAAVRAVAATARPASSAAAAAGMSVAALVVQGEDTPFGSLGWWAYAGTSCFLVLFAGIMSGLTLGLMSLGLVELEILQRSGTDSEKAQAATILPVVQKQHQLLVTLLLCNAVAMEALPIFLDRMFHPVVAVVLSVTFVLAFGEVIPQAICTRYGLAVGANFVWLVRILMIMCYPIAYPIGKLLDCALGHNESALFRRAQLKALVSIHSKEAGKGGELTHDETTIISGALDLTEKTAEEAMTPIESTFSLDVDSKLDWEAIGKILARGHSRVPVYSGNPRNVIGLLLVKSLLTVRAETETPVSAVSIRRIPRVPADMPLYDILNEFQKGSSHMAAVVKAKPKTAPPPEPNRAAAGVTQLTTPLLSNVEERVENVVVDIEAPQSKQ…	12352.3	29390.7	22409.2	15075.2	19806.9	18079.7	18737.6	15657.7	24631.3	19276.6	10343.9	6601.59	15858.7	3313.43	9029.4	4827.37	3121.06	4579.54	5459.24	4496.8	6761.31	8861.55	1143.01	3248.79	5003.66
Bradi2g27190.1	5.22677e-06	2.61145e-05	0.00194295	8.91222e-05	6.67353e-07	2.80837e-06	6.67353e-07	0.660379	0.390506	0.660379	0.515699	0.390506	0.404802	MTAVTPTQEELLRAHLEEQKIEEGDEPVVEDDDDEEDDDDDEDDKDDDDVEGGDASGRSKQSRSEKKSRKAMLKLGMKSITGVSRVTVKKSKNILFVISKPDVFKSPASDTYVIFGEAKIEDLSSQLQSQAAEQFKAPDLSSVISNPEASTAAQDDDEEVDDTDVEPKDIELVMTQAGVPRARAVKALKSADGDIVSAIMELTN	84333.2	98477.1	130757	107228	105199	56110.9	74251.7	66169.4	81352.4	69471.1	59764.6	57440.3	47845.1	51953.9	54251	45732.3	28134	40414.9	50041.7	41080.7	40055	34982.6	43700	51601.2	42584.7
Bradi2g28680.1	2.72887e-08	4.75489e-07	0.000714475	2.7971e-09	1.41164e-10	1.17168e-08	1.41164e-10	0.699425	0.305976	0.699425	0.391341	0.305976	0.351624	MSSDDEVREEKELDLSSNEVVTKYKTAAEIINKALKLVLSECKPKAKIVDICEKGDNFITEQTGNVYKNVKKKIERGIAFPTCLSVNNTVCHFSPLATDDAILEENDMVKIDMGCHIDGFIAVVAHTHVIKDGPVTGRAADVLAAANTAAEVAMRLVRPGKNNKDVTEAIQKVATAYDCKIVEGVLSHQLKQFVIDGNKVVLSVSNADTKVDDAEFEENEVYAIDIVTSTGEGKPKLLDEKQTTIYKRAVDKNYHLKMKASRFIFSEISQKFPIMPFTARVLEEKRARLGLVECMNHELLQPYPVLHEKPGCDLVAHIKFTVLLMPNGSDRVTSHSLQELQPSKSIEDNAEIKGWLALGTKTKKKGGGKKKKGKKGDAAEAEPMEEGSKDAPSQE	61447.2	79525.3	87432.7	77474.6	76469.9	42792.3	57442.6	52953.7	60751.2	53485	30157.2	37533.3	24368.1	27644.7	29925.8	25838.8	22391.5	23422.9	21938.7	23398	25642.6	25604.8	26280.9	30026.2	26888.6
Bradi2g30560.1	1.75934e-05	6.74248e-05	2.11759e-05	1.51046e-05	0.000189727	1.9252e-05	1.51046e-05	0.413151	0.257782	0.292944	0.306053	0.413151	0.257782	MATTTFPTSTPFFVNHGSRRPSVNVRTAAAVYGRGGRRWRPLRVACEKVVGIDLGTTNSAVAAMEGGKPTIVTNAEGARTTPSVVAYTKAGDRLVGQIAKRQAVVNPENTFFSVKRFIGRKMNEVAEESKQVSYRIIRDDNGNVKLDCPAIGKQFAAEEISAQVLRKLVDDASKFLNDKVTKAVITVPAYFNDSQRTATKDAGRIAGLDVLRIINEPTAASLAYGFEKKNNETILVFDLGGGTFDVSVLEVGDGVFEVLSTSGDTHLGGDDFDKRIVDWLAGSFKNDEGIDLLKDKQALQRLTEAAEKAKMELSSLTQTNISLPFITATADGPKHIETTLTRAKFEELCSDLLDRLRTPVDNSLRDAKLSLKEIDEVILVGGSTRIPAVQDLVKKMTGK…	306073	655571	441980	422542	456542	123523	121114	140730	149598	133741	134299	132966	154965	136674	139726	136298	221051	199808	197326	188621	149954	107203	98194.5	115402	117688
Bradi2g31107.1	0.000256716	0.000643699	0.00357996	0.000451292	0.000426051	0.000114424	0.000114424	0.610811	0.458338	0.610811	0.512776	0.514314	0.458338	MEEKGGGLGRPQRREKRRMCGPAASSEPGSMAMTSQDLCSSRSCEEDGGGTATTHGKWNPYESHRPEIDDAPVFTPTEEEFEDPIGYITSIRPQAEKYGICRIVPPPSWRPPCPLKEKSFWDCTEFNTRVQEVDKLQNREPTKKRTQPRVQKKRKRRKRLRFGMFRRRPSANASENADSEEKFGFQSGSDFTLEEFQKYADEFKQRYFGMKGSDEISLSEIKNHKEIWRPSVEEIEGEYWRIVVCPDDEVEVDYGADLDTATFGSGFPKLSLSDANKQDPYCLSCWNLNNLRRQHGSVLSFETEDISGVVVPWLYVGMCFSSFCWHVEDHFLYSLNYMHFGEQKVWYGVRGDDAVKLEEAMKRNLPRLFEEQPDLLHELVTQLSPSVLKSEGIPVYRVV…	10272.7	9603.5	14660.4	13629.3	12041.5	5611.22	7401.1	6926.58	9481.35	7355.06	6712.13	7277.83	4910.79	5797.53	6174.57	7770.64	7291.79	5540.27	4169.7	6193.1	4782.93	5095.27	6164.44	6033.62	5519.06
Bradi2g33060.1	7.28588e-05	0.000221366	0.162698	0.0347522	2.54197e-05	0.000308502	2.54197e-05	0.724615	0.147516	0.724615	0.614332	0.147516	0.276182	MSKYGTIPSSSSSEPPPTAGSSPLDFISRAKALGASALSTRRPWRELADPGALAVPRGLGDAYARARANLAHFSMNYAIVVLAVVFVSLLWHPWSLVVFLACMVAWLFLYFLRDVPLQVSAGRAVIGDGVVLAALSGITLVLLLLTGATANILGSLLVGVVLVLVHALLHRPADSIDEEAGRWYTPVPPPPPY	7416.56	17151.6	16785.6	9922.97	12819.2	9252.08	10591.7	7390.14	9921.92	9288.95	6867.4	9053.99	7024.75	8554.76	7875.23	2181.03	1732.44	2536.31	1114.35	1891.03	2495.48	3074.16	3437.21	5154.84	3540.42
Bradi2g33450.1	2.4997e-07	2.59392e-06	0.00757985	1.08737e-08	1.74408e-06	1.33718e-06	1.08737e-08	0.780766	0.398242	0.780766	0.398242	0.512038	0.526792	MAGGGVEDAYGEDRATEEQLITPWSFSVASGHSLLRDPRHNKGLAFSEAERDAHYLRGLLPPVIASQELQEKKLMHNLRQYTVPLQRYIAMMDLQERNERLFYKLLIDNVEELLPVVYTPVVGEACQKFGSIYRRPQGLYISLKDKGKVLEVLKNWPERSIQVIVVTDGERILGLGDLGCQGMGIPVGKLSLYTALGGVRPSACLPITIDVGTNNETLLNDEYYIGLRQRRATGEEYHELLQEFMTAVKQNYGEKVLVQFEDFANHNAFDLLAKYSKSHLVFNDDIQGTASVVLAGLLASLKVVGGTLADHTYLFLGAGEAGTGIAELIALEMSKHTDTPVDDCRKKIWLVDSKGLLVESRKESLQHFKKPFAHEHEPMKTLLEAVQSIKPTVLIGTSG…	1.0766e+06	1.47627e+06	1.3658e+06	1.1728e+06	1.27287e+06	915846	848557	1.0321e+06	1.17875e+06	993812	510805	481946	511208	523680	506910	661922	626057	639942	679105	651757	598478	681389	701955	700326	670537
Bradi2g34440.3	1.28548e-07	1.61809e-06	0.0192015	4.25767e-05	4.76636e-09	3.00375e-08	4.76636e-09	0.801504	0.349422	0.801504	0.595998	0.349422	0.438529	MGRRPARCYRQIKNKPYPKSRYCRGVPDPKIRIYDVGMKKKGVDEFSHCVHLVSWEKENVSSEALEAARIACNKYMTKSAGKDAFHLRVRVHPFHVLRINKMLSCAGADRLQTGMRGAFGKPQGVCARVAIGQVLLSVRCKPNNAVHATEALRRAKFKFPGRQKIIESRKWGFTKHNRNDYLKFKSEGRIVSDGVNAKLLGCHGRLSARAPGQAFLTAA	83760.9	101975	98433.8	97738.9	95477	56684.2	87422.4	76205.7	85788.7	76525.2	54312.9	63634.6	50718.2	58950.7	56904.1	39776.8	31160.1	32354.9	30155.2	33361.8	33789	46322	42154.1	45212.6	41869.4
Bradi2g34650.1	0.000396509	0.000938405	0.51189	0.161289	0.000360727	0.000884769	0.000360727	0.826974	0.312275	0.826974	0.725156	0.312275	0.383057	MAMQTQTPSMSTPMILLLALLCLSAAARSAHAQTPAATAPAPATAAATPKTIKAVLTKAGQFTKFLQLLQSTQEDSQIDNQLKGKSSSGGLTVFAPPDNAFSALKSGTLNALSDAQKTSLVQFHVVSQLIPMAQFDTASNPLRTQAGETRPGKYPLNVTADGQQVNISTGVVNASVSGTVYTGDRLVVYQVDKVLLPWALYGPALPPAPAPSPVEKEKEKGKVGPKAAADAPAADAATASEAAVPARPGGVWGQGGVFGVAVAVAAAWFVV	971880	1.13295e+06	2.13142e+06	1.914e+06	1.53756e+06	1.1391e+06	1.57075e+06	1.19908e+06	1.17717e+06	1.27153e+06	1.20888e+06	1.20172e+06	1.12639e+06	922907	1.11497e+06	567044	553603	387215	412711	480143	680879	716977	533425	424618	588975
Bradi2g35020.1	5.90307e-09	1.53139e-07	0.00218798	1.6514e-08	4.77775e-10	9.45044e-12	9.45044e-12	0.752026	0.262162	0.752026	0.435727	0.262162	0.345031	MATPQISRKTLALVLLLVAAAAAALSPAAAEGDEVLALTESTFDKEVGQDRAALVEFYAPWCGHCKKLAPEYEKLAASFKKAKSVLIAKVDCDEHKSVCSKYGVSGYPTIQWFPKGSLEPKKYEGQRTAEALAEYVNSEAATNVKIAAVPSSVVVLTEETFDSVVLDETKDVLVEFYAPWCGHCKSLAPVYEKVASAFKLEDGVVIANLDADKHTSLAEKYGVSGFPTLKFFPKGNKAGEEYEGGRDLEDFVKFINEKSGTSRDSKGQLTSEAGLVASLDALVKEFHSAADDKRKEVLSKIEEEAAKLSGSAAKHGKIYVNAAKKIIEKGSDYTKKETERLHRMLEKSISPSKADEFVIKKNILAIFSS	192307	214926	228042	156834	198027	139639	141084	150694	164269	148922	83916.4	79526	86108.6	95592.5	86285.9	47979.8	53321	55228.3	51131.6	51915.2	84101.1	67601.8	63775.6	57823.9	68325.6
Bradi2g35050.1	1.92798e-07	2.14946e-06	0.00390505	5.52012e-07	1.36971e-09	1.10921e-07	1.36971e-09	0.711177	0.270528	0.711177	0.434119	0.270528	0.358996	MSLRPSERAEVRRGRYKASVDAEEGRRRREDQMVEIRKNRREDFLLKKRREGLPSSAAPGGASQMGHSSALQQKLEGLPAMVQAVLSDDSAVQLEATTQFRKLLSIERSPPIEEVINTGVVPRFIEFLKREDYPQLQFEAAWALTNIASGTSENTKVVVEYGAVPIFVTLLSSPSEDVREQAVWALGNVAGDSPKCRDLVLGSGGLFPLLQQLNEHAKLSMLRNATWTLSNFCRGKPQPNFEQVKPALSALQRLIHSQDEEVLTDACWALSYLSDGTNDKIQSVIESGVFPRLVELLMHPSASVLIPALRTVGNIVTGDDLQTQCVIDHQALPCLLNLLTTNHKKSIKKEACWTISNITAGNRDQIQAVINANIIGPLVHLLQGAEFDIKKEAAWAISN…	121986	184336	192483	185005	170952	107601	114491	133530	130688	121577	81233	87464.3	71323.9	56833.4	74213.7	52518.7	35811.1	44995	51664.8	46247.4	61954.9	57325.2	66179	60025.7	61371.2
Bradi2g35090.1	1.34639e-06	9.6203e-06	0.141905	0.000626082	1.70678e-06	2.27885e-05	1.70678e-06	0.858161	0.429556	0.858161	0.675815	0.429556	0.508999	MGIDLVAGGRNKKTKRTAPKSDDVYLRLLVKLYRFLVRRTKSKFNAVILKRLFMSKTNRPPLSMRRLSNFMKGKDEKSIAVIVGTITDDKRIQEIPAMKVTALRFTETARARIINAGGECLTFDQLALRAPMGENTILLRGPKNAREAVRHFGKAPGVPHSHTKPYVRSKGRKFEKARGRRNSRGFKV	155793	190899	160406	180238	171834	109951	157787	173237	148871	147461	121531	123212	102546	117224	116128	72875	89224.4	72967.8	60182.2	73812.3	85548.1	91547.6	78793.7	93964	87463.4
Bradi2g35620.1	6.53603e-09	1.6636e-07	0.00103315	1.97343e-08	3.44279e-11	1.17032e-11	1.17032e-11	0.779659	0.407097	0.779659	0.526324	0.407097	0.430639	MARGLKKHLKRLNAPSHWMLDKLGGAFAPKPSSGPHKARECLPLILILRNRLKYALTYREVQSILMQRQILVDGKVRTDKTYPAGFMDIISIPKTGENYRLLYDTKGRFRLHSVRDEDSKFKLCKVRSVQFGQKGIPYLNTYDGRTIRYPDPLIKANDTIKIDLETNKIVDFIKFDVGNVVMVTGGRNTGRVGVIKNREKHKGTFETIHVEDAQGHQFATRLGNVFTIGKGTKPWVSLPKGKGIKLTIIEEQRKRDAAAQAAAKA	537699	708975	704832	646947	649613	450001	542784	505069	528053	506477	347883	352822	310411	356512	341907	276456	298853	222773	259739	264455	277872	272011	283258	285852	279749
Bradi2g35987.1	4.05521e-05	0.000136421	0.00124799	5.52982e-05	7.56704e-05	7.62206e-05	5.52982e-05	0.657326	0.4977	0.657326	0.556018	0.543993	0.4977	MAGDTASAPASAPPTAELAAVSIADLEPATSRTRIRAILDAGDALAGQRVVVGGWVKTGRQQGKGEFAFLEVNDGSCPGNLQVMVDKDVHPLPRLTPTGTSVLVEGVLKKPPEEAKQRIELKVEKVIEVGEVDAAAYPLPKTRITLETLRDFVHLRARTNTIGAVARIRHQLAFATHSFFDENGFLYIHTPIITTSDCEGAGEMFQVTSLFSQAEKVEKELRENPAPSEADIEAAKLVVKEKGDAVAQLKAAKASKQEITSAVSELHKAKENVSRLEERSKLKPGIPHKDDGTVAFENDFFKRQAFLTVSGQLQVETYACALSSVYTFGPTFRAENSHTSRHLAEFWMVEPEIAFANLQDDMNCAESYVQYLCKWLLKHCREDMEFMVKNYDKTAIERL…	73132.5	71741.1	87052.8	70683.9	75652.6	45996.3	55413.3	43105	54399.2	49728.4	44997.1	42689.5	41002.9	39567.3	42064.2	36561.5	37761.8	51401.7	38892.8	41154.5	36515.2	55943.3	25861.8	32288.9	37652.3
Bradi2g36000.1	7.36985e-05	0.000223414	0.0541027	0.00210138	0.000153373	2.39092e-05	2.39092e-05	0.669994	0.193349	0.669994	0.469526	0.306783	0.193349	MGLDLGALALRYTGLSVSDHDSIVAINIFVALLCGCIVFGHLLEGNRWVNESTTALLMGLLTGFVILLVTNGVNSRILVFSEDIFFIYLLPPIIFNAGFQVKKKQFFRNFMTIILFGAVGTLISFVIITLGAMGLFSKLDVGPLQLGDYLAIGAIFSATDSVCTLQVLNQDEAPLLYSLVFGEGVVNDATSVVLFNAIQNIDINHFDALVLLQFIGKFLYLFFTSTILGVAAGLLSAYIIKKLCFARHSTDREVAIMILMAYLSYMLSMLLDLSGILTVFFCGIVMSHYTWHNVTESSRVTTKHTFATLSFIAEIFLFLYVGMDALDIEKWKLASSSPKKPIALSAVIMGLVMVGRAAFVFPLSFLSNLSKKESRTKISFKQQVIIWWAGLMRGAVSIA…	12360.4	21925.5	19963.3	11657.2	16476.6	14893.1	8882.2	9306.25	11075.3	11039.2	6619.29	5306.52	8877.77	10141.2	7736.19	5756.63	4632.31	4868.45	4961.57	5054.74	2630.87	2301.64	3095.03	4715.36	3185.73
Bradi2g37400.1	9.57652e-06	4.18082e-05	0.00666552	5.47089e-05	2.10764e-05	1.39305e-05	1.39305e-05	0.793259	0.605327	0.793259	0.608324	0.605327	0.634352	MASPALICDTEQWKALQAHVGAIQKTHLRDLMTDAGRCKAMTAEFEGIFLDYSRQQGTVETMDKLFKLAEAAKLKEKIEKMFKGEKINTTENRSVLHVALRAPRDAVINSDGVNVVPEVWSVKDKIKHFSETFRSGSWVGATGKALTNVVSVGIGGSFLGPLFVHTALQTDPEAAESAKGRQLRFLANVDPVDVARSIKDLDPETTLVVVVSKTFTTAETMLNARTLKEWIVSSLGPQAVSKHMIAVSTNLKLVKEFGIDPNNAFAFWDWVGGRYSVCSAVGVLPLSLQYGFPIVQKFLEGASSIDNHFHTSSFEKNIPVLLGLLSVWNVSFLGYPARAILPYSQALEKLAPHIQQLSMESNGKGVSIDGVRLPFEAGEIDFGEPGTNGQHSFYQLIHQ…	188510	219763	214389	189560	203056	165616	154433	153103	171151	161076	138489	127446	95754.1	132406	123524	133241	138670	120295	99454.2	122915	130965	108195	129528	146546	128809
Bradi2g37470.1	5.49214e-05	0.000175983	0.0166875	8.40972e-05	2.58401e-05	0.000540072	2.58401e-05	0.745333	0.488312	0.745333	0.537332	0.488312	0.60218	MAVDLTPRQPTKAYGGEGGAYYEWSPAELPMLGVASIGAAKLSLAAGGMSLPSYSDSAKVAYVLQGKGTCGIVLPEATKEKVVGIKEGDALALPFGVVTWWHNTPDSATDLVVLFLGDTSKGHKPGQFTNFQLTGSTGIFTGFSTEFVGRAWDLKEPDAAKLVSSQPASGIVKLAAGQKLPEPVAADRKDMALNCLEAKLDVDIPNGGRVVVLNTVNLPLVKEVGLGADLVRIDAHSMCSPGFSCDSAYQVTYIVRGSGRVQVVGPDGKRVLETRIEGGSLFIVPRFHVVSKIADASGMEWFSIITTPNPIFSHLAGKTSVWKAISSELLEAAFNTTPEMEKLFRSKRTDSEIFFAPN	72053.9	106487	109992	92254.1	95196.6	56400.6	76230.9	72686.6	78494.2	70953.1	56482.1	49928.8	40947.3	57250.4	51152.1	49615.9	54830.5	40367.2	41128.9	46485.6	53451.2	53153.7	66449	56247.8	57325.4
Bradi2g37480.1	0.000293124	0.000722896	0.0695267	0.000599246	0.000665215	0.000258737	0.000258737	0.778948	0.529185	0.778948	0.573419	0.572476	0.529185	MTVEVCVKAAVGHPDTLGDCPFSQRVLLTLEEKKVPYEMKLIDVSNKPEWFLKINPEGKVPVFNSGDGKWIADSDVITQIIEEKYPTPSLVTPPEYSSVGSKIFSTFIAFLKSKDASDGTEKALLDELQALEEHLKAHGPYINGENVSAADLSLGPKLFHLQVSLEHFKGWKIPETLTGVHAYTEALFSRESFAKTKPAKEHLIAGWAPKVNP	248987	342168	392243	265593	312248	188973	240625	246137	297165	243225	153293	200200	174050	188652	179049	191931	170359	177129	175598	178754	138301	177388	165395	179863	165237
Bradi2g39610.1	5.06977e-05	0.000164001	0.0299184	0.00164285	2.22823e-05	1.80286e-05	1.80286e-05	0.626772	0.196247	0.626772	0.447682	0.204901	0.196247	MAGRANIPANSSALIAIIADEDTVTGFLMAGVGNVDLRKKTNYLLVDNKTTVKQIEDAFKEFTAREDIAIVLISQYIANMIRFLVDSYNKPIPAILEIPSKDHPYDPANDSVLSRVKYLFSADSVASDRR	34760.6	56653.6	63366.8	50447.7	51307.2	49362.2	23434.8	25099.4	30735.2	32157.9	21904.1	13259.7	23210	33503.3	22969.3	9953.78	19703.6	5033.57	7360.68	10512.9	5895.62	12306.1	11421.1	10652.6	10068.9
Bradi2g39690.1	1.39542e-05	5.65293e-05	0.0381476	0.000242726	1.7057e-05	1.7294e-05	1.7057e-05	0.762403	0.414705	0.762403	0.549173	0.435993	0.414705	MASVFSGDETAPFFGFLGAAAALVFSCMGAAYGTAKSGVGVASMGVMRPELVMKSIVPVVMAGVLGIYGLIIAVIISTGINPKAKPYFLFDGYAHLSSGLACGLAGLAAGMAIGIVGDAGVRANAQQPKLFVGMILILIFAEALALYGLIVGIILSSRAGQSRAD	121837	150298	147453	124955	136136	92456.2	94148.3	122366	106191	103790	79153.4	65931.8	69084.6	84878.9	74762.2	75811.3	87388	42555.5	31662.6	59354.3	47975.2	54099.4	68829.8	54920.4	56456.2
Bradi2g39770.1	0.000205715	0.000528589	0.226969	0.0743849	0.000393183	0.000144844	0.000144844	0.835518	0.500024	0.835518	0.779647	0.549157	0.500024	MAGAGSGRRGGGGGGEEEYDYLFKVVLIGDSGVGKSNLLSRFTRNEFCLESKSTIGVEFATRTLHVEGKIIKAQIWDTAGQERYRAITSAYYRGALGAVLVYDVSKPTTFENISRWLKELRDHADANIRIMLVGNKTDLKHLRAVATDDGQSFAEAEGLSYIETSALEATNVEEAFQLILGDIYRAISKKAVALDDGGAGGAGGGVKEGKTINVAASDTSGEKKQCCSA	8116.67	7482.37	10161.1	9296.34	8764.12	6081.33	6150.61	7732.96	9325.4	7322.57	5962.34	7398.63	5959.16	8011.52	6832.91	5076.68	5973.09	3880.37	4321.37	4812.88	4831.64	4645.96	3986.97	4064.51	4382.27
Bradi2g41087.1	7.97705e-05	0.000239546	0.939351	0.845569	0.000252776	0.00178583	0.000252776	0.913177	0.145475	0.913177	0.881668	0.145475	0.331494	MEAGAPARKESGLRLLPARHGGHAHGHSGLARTAHGMSSSSLRKKSDARLVHKLPVAGLRPVLANLQEVFLGTKLAVLFVAVPLAVAAQCFHFGQVWVFACSLIGLIPLAERVSFLTEQLALYTGPTIGGLLNATCGNATELIIALFALMEGKIEVVKCSLLGSVLSNLLLVLGTSLFCGGIKNLHHDQPYDRKQADVSTGLLILGALCQSLPLLLRYAVGAGEHSVAADTTVLELSRASSFVMLLAYVAYLFFQLKTHRQLFEPQEIEGGGAGGDEAEEEEVPVLGFWSALLWLVLMTVVISVLSEYVVGTIEPTSQAWGLSVSFISIILLPIVGNAAEHAGAIIFALKNKLDITLGVALGSATQISMFVVPLSVLVAWIMGIQMDLDFKLLETGSLF…	4973.77	9081.42	6189.08	3859.38	6025.91	5284.74	4145.42	5191.52	7389.22	5502.72	5386.52	4337.44	4948.7	6578.78	5312.86	884.389	1727.37	480.795	413.913	876.617	1899.04	2294.23	1873.21	1923.72	1997.55
Bradi2g41660.1	8.8288e-06	3.95683e-05	0.002157	0.000426528	2.18213e-06	1.60243e-05	2.18213e-06	0.631991	0.313165	0.631991	0.549094	0.313165	0.396726	MEDACLSTQLIDGDGVFNVSGLENFMKEVKLADCGLSYAVVSIMGPQSSGKSTLLNHLFRTNFREMDAFRGRSQTTKGIWMAKAQNIEPCTLVMDLEGTDGRERGEDDTAFEKQSALFALAVSDIVLINMWCHDIGREQAANKPLLKTVFQVMMRLFSPRKTTMLFVIRDKSKTPLENLEPILREDIQKIWDAVPKPHAHKETPLSEFFNVQVVALNSYEEKEELFKQQVSDLRDRFQHSIAPGGLAGDRRGVVPASGFSFSSQQFWKVIKENKDLDLPAHKVMVATVRCEEIGHEKVTSFTADEEWQHFEEAVQSDYVPGFGKKISSLLDRCLSEYDMEAIYFDEGVRTSKRQQLESKLLQLVNPAYQSLLGHLRTRTLEAFKESFDKALEKEGFAVA…	159583	166925	149018	119337	148716	86649.2	80835.2	90898.6	117565	93986.9	72795	56594.4	98652.8	98593	81658.8	38943.3	29775.8	69742.2	47829	46572.6	67765.7	64090.6	66704.1	37436.9	58999.3
Bradi2g42100.1	8.90014e-06	3.97521e-05	0.199157	9.48382e-05	8.83261e-06	3.10947e-05	8.83261e-06	0.826883	0.369423	0.826883	0.486891	0.369423	0.436727	MYSWEMLSFNIHDGFLEAIVRGNRSGLLTAADYNNLCQCETLDDIKMHLSATEYGPYLQNEPSPLHTTTIVEKCTLKLVDEYKHMLCQANEPLSTFLQYITYGHMIDNVVLIVTGTLHERDVNELLEKCHPLGMFDSIASLAVAQNMRELYRLVLVDTPLAPYFSECITSEDLDDMNIEIMRNTLYKAYLEDFYKFCAKLGGATADIMCNLLSFEADRRAVNITINSIGTELTRDDRRKLFSNFGLLFPYGHEELAVCEDVDQVRGVMEKYPPYQSIFAKISYGESQMLDKAFYEEEVRRLCLSFEQQFHYAVFFAYMRLREQEIRNLMWISECVAQNQKNRVHDSVVFIF	149176	248711	272980	242763	228407	164023	190659	197359	203424	188866	101474	113693	103037	126634	111209	107829	97932.5	63901.1	67853.9	84379.1	81775.9	95352.9	113309	108569	99751.7
Bradi2g43200.1	0.00218269	0.00418245	0.736219	0.0986074	0.0107235	0.00116371	0.00116371	0.838866	0.228592	0.838866	0.607112	0.416318	0.228592	MMSGGGYSALDDPKASGSVPAVTGPDPQTIKFADSNLQTFPPSEAKGKISGAYRPPTDADDTFSSKTGGGGGGSGGGGSDDAAQGGWFRMFSVAAYKPYFDVDTSDVVERIWESVFPFRGNFTEKTSEKPDLYGPFWTCTTLIFVAASIATFVTYLSHKWHKKDWTYDINLVTWSAGLFYGYVTFVPLGLYVILKYFSAPAGLVQLWCLYGYSLFIFIPASLLSIVPIEIFRWVIAGVAGFMSATFVAVNLRAHILNSGERWVLIVAGIFLLQLGLAVLLKLYFFTITV	6829.49	8555.81	8731.79	6263.98	7595.27	6703.6	6650.35	2636.99	9494.69	6371.41	4522.71	3669.07	3563.2	6689.73	4611.18	5263.94	4071.74	2782.25	530.252	3162.05	2230.77	1089.99	1608.11	2016	1736.22
Bradi2g43510.1	2.23699e-05	8.22263e-05	0.268343	0.00233188	0.291913	0.0101162	0.00233188	1.37685	0.546109	0.810971	0.546109	0.81678	1.37685	MADAAPTVSKSPPALVPPVGPTPRGALPLSSIDKTAAVRVSVDFIQVFPPSTDGASAGDQVAAMRDGFARALVPYYPVAGRIAEPTPGDLVVDCTGEGVWFVEAAASCSLADVNGLERPLLIPKGELIPRPPPEEKLEDLILMAQVTKFTCGGFAVGICFSHLVFDGQGAAQFLKAAGELARGLPAPSVAPVWDRDAIPDPPKLPRGPPPSFTAFNFVTQVVEISPENIARIKEDFKAATGGETCSTFDAVTAVVFKCRALAVELPDTAEVRLGFAASTRHLLQGVLPSVDGYYGNCVYPVGITRSSKTIREAALTEVVGVMREAKEALTVRFTDWMRGGAKDDHYNVPLDYGTVTVSDWSRVGFNEVDYGFGEPGYVFTLNDDVNIVASVIYLKPPTP…	36785.8	60791.2	48064.5	34993.5	45158.7	34737.3	35242.6	36633.5	39876.3	36622.4	26151.3	22220	23650.7	26624.4	24661.6	43533.7	29565.2	36639.2	37801	36884.8	54901.4	57687.2	68117.8	68001.5	62177
Bradi2g44030.1	2.53105e-06	1.56624e-05	0.00758541	0.000279463	2.82323e-06	7.89109e-07	7.89109e-07	0.592679	0.0749052	0.592679	0.402845	0.117654	0.0749052	MAAAAASDLESKAKEAFVDDDFELAAELYTQAIEAGPATAELYADRAQAHIKLGSYTEAVADANKAIELDPSMHKAYYRKGAACIKLEEYQTAKAALELGSSYASGDARFARLIKECDDRIAEEASQVPAKKATAVVPAATSGATTVATPAEDKEDGANMENSLPNVEVPSKPKYRHDFYNSTTEVVLTIFAKGVPADTVVVDFGEQMLSVSIELPGEEPYHFQPRLFAKIIPEKCKYFVLSTKVEIRLAKAEPLTWTSLDYSGKPKVPQKINLPAESAHRPSYPSSKPKKDWDKLEAEVKKQEKDEKLDGDAALNKFFREIYSDADEDMRRAMMKSFVESNGTVLSTNWKDVGTKKVEGSPPDGMELKKWEY	6357.21	8902.78	6672.91	4221.29	6538.55	3855.63	2761.41	4032.7	4851.28	3875.26	2836.24	2708.57	1931.84	3059.44	2634.02	1483.54	910.814	0	682.791	769.287	489.975	0	411.053	1058.05	489.771
Bradi2g45420.1	5.77748e-06	2.81365e-05	0.00191833	1.0793e-05	2.88877e-06	3.95644e-06	2.88877e-06	0.718758	0.510755	0.718758	0.546425	0.510755	0.529407	MAFEKIKVANPIVEMDGDEMTRVFWQSIKDKLIFPFLDLDIKYYDLGVLHRDATDDKVTVEAAEATLKYNVAIKCATITPDEDRVKEFNLKQMWRSPNGTIRNIINGTVFREPIICKNVPKLVPGWTKPICIGRHAFGDQYRATDAVLKGPGKLRLVFEGKEETVDLEVFSFTGAGGVALSMYNTDESIQGFAAASMATAYDKKWPLYLSTKNTILKKYDGRFKDIFQEVYEAEWKSKFEAAGIWYEHRLIDDMVAYALKSEGGYVWACKNYDGDVQSDFLAQGFGSLGLMTSVLVCPDGKTIEAEAAHGTVTRHFRVHQKGGETSTNSIASIFAWTRGLAHRAKLDDNARLLEFAQKLEDACVGTVESGKMTKDLALLVQGSSNVTRSHYLNTEEFID…	483257	621490	640441	580342	581383	338273	416892	415718	500611	417873	347539	337631	298864	286695	317682	349555	253159	295054	290008	296944	257025	280839	332326	360963	307788
Bradi2g45460.1	0.000123689	0.000340549	0.998521	0.581184	0.000126019	0.021268	0.000126019	1.0129	0.64772	1.0129	0.92567	0.64772	0.804728	MAMQHVVKVDEGRPAADGRPSVGPTYRSAFARDGFPAPVPGLESCYDIFRMAVEKYPNNRMLGRREIVDGKAGAYVWKTYKEVFGIANKIGNSIRSHGLTKGSRCGIYGANSPEWIITMEACNAHGIYCVPLYDTLGAGAIEFILCHAEVEIAFAEEKKVQELLKTFPKSTEFLKTIVSFGNVTQEQKEEVSKYGLSIYSWDEFLSLAGDQEFDLPVKQKTDICTIMYTSGTTGDPKGVLISNASIISLIAGVDRLLNSVNERLEETDVYMSYLPLAHIFDRVVEELFMFHGASIGFWRGDVKLLVEDIGVLKPTILCAVPRVLDRIFSGLQAKISAGGFIKSTMFSLAYKFKQFRMMRGAKHNEAAAICDKVVFSKVKEGLGGNVRVILSGAAPLATH…	2.65207e+06	2.87448e+06	3.51543e+06	3.4471e+06	3.12227e+06	2.86752e+06	3.31557e+06	2.99731e+06	3.46982e+06	3.16256e+06	2.74157e+06	2.89972e+06	2.7398e+06	3.17968e+06	2.89019e+06	2.0561e+06	2.27968e+06	1.86637e+06	1.88728e+06	2.02236e+06	2.56776e+06	2.34146e+06	2.74631e+06	2.39478e+06	2.51258e+06
Bradi2g45580.1	1.34476e-06	9.6203e-06	0.150745	0.000107465	9.26415e-07	3.02664e-06	9.26415e-07	0.832924	0.338409	0.832924	0.549326	0.338409	0.399826	MENCWKYAALGKQMITTQKQEKSRICEPGPRNNSEQTDRHRQRRNQTDHVAPRLSLLAPTTPFLPSTTPVDSLLLPCPPPIPRAAVSGSRGTQQPPAVIYAAVTKMNDADVSKQILQMVRFIRQEAEEKAGEISVSAEEEFNIEKLQLVEAEKKKIRQEYERKEKQVDVRKKIEYSMQLNASRIKVLQAQDDLVNKMKEDAMKELLNVSSNHHEYKHLLKELVVQGLLRLKEPAVLLRCRKEDHHHVESVLHSAKNEYAAKANVHEPEILVDHSVYLPPSPSRQDTHGQFCHGGVVLASRDGKIVFENTVDARLEVVFRKKLPEIRKLLVAA	995273	1.51791e+06	1.4397e+06	1.09857e+06	1.26286e+06	1.15898e+06	1.00806e+06	975808	1.06463e+06	1.05187e+06	644418	663593	655034	811848	693723	562814	520435	327458	298747	427364	502561	425526	550099	541515	504925
Bradi2g46120.1	9.76689e-05	0.000282737	0.212594	0.9384	0.0050942	0.0165374	0.0050942	1.2737	0.443984	1.2737	1.0828	0.443984	0.529977	MAARRTGIAAVAAAAFFAMVSVSLAQAPAPDATPSGPPNVTAILVKGGQYTTFIRLMKETQQDTQLNSQLNNSFNGNGYTVFAPTDNAFNNLKPGTLNSLTQQQQVALVQGHVLPQFYSMESFQTASNPVRTQASGQDGPFTLNITATANNQVNVSSGVSEVTVNNALSDKKPLAVYSVDKVLLPLEFFGAKAPAAAPAASKDGKTKKGEAASGPAGSDDEASPTSAAAGGARAVAWGVAAMAAVLGYLL	507634	624333	901268	834814	717012	648987	947923	822591	1.23354e+06	913260	760069	863561	753330	728574	776384	307146	277626	330049	358546	318342	304749	367533	485961	361757	380000
Bradi2g46380.2	0.00245124	0.00463127	0.762071	0.0137196	0.00912598	0.00265537	0.00265537	0.782848	0.00717948	0.782848	0.210326	0.16458	0.00717948	MAPIGVGSTLPDGQLAWFDENDQLQQVSIHALAAGKKVILFGVPGAFTPTCSNQHVPGFISQAEQLKAKGVDEILLVSVNDPFVMKAWAKTYPENKHVKFLADGAGKYTNVLGLELDLTEKGLGLRSRRFALLADDLKVTVANIEEGGQFTVSGAEEILKAL	0	31048.2	31861.3	26270.3	22294.9	16189.9	15202.5	15206	23215.8	17453.5	4291.76	10755.7	3709.35	0	4689.21	1549.54	797.44	7659.64	4670.58	3669.3	0	0	640.264	0	160.066
Bradi2g46840.1	2.23324e-07	2.39099e-06	0.0422799	1.82381e-05	1.01986e-08	1.84242e-07	1.01986e-08	0.799012	0.323875	0.799012	0.509604	0.323875	0.34541	MAGQESLAYAGVMRGHNDVVTAIATPIDNSPFIVSSSRDKSLLVWDLTNPIQATQDSSSEYGIPFRRLTGHGHFVQDVVLSSDGQFALSGSWDGELRLWDLSTGVTTRRFVGHEKDVLSVAFSVDNRQIVSASRDRTIKLWNTLGECKYTIGGDHGGGEGHTGWVSCVRFSPNTFVPTIVSGSWDRSVKVWNLTNCKIRSTLDGHGGYVSAVAVSPDGSLCASGGKDGVTLLWDLAEGKRLYSLDAGAIINSLCFSPNRYWLCAATQDSIKIWDLESKHVVQDLRPEVPVSKNQMLYCTCLSWSADGSTLYAGYTDGTIRIYKISGFSYST	142274	233555	208769	196584	195295	141191	170637	143653	168692	156043	105384	94703.9	91327.9	106678	99523.3	52614.2	65809.1	68028.4	66553.5	63251.3	75277.6	55644.4	76027.3	62878.3	67456.9
Bradi2g47330.1	0.00161476	0.00323191	0.138786	0.0126299	0.980909	0.38699	0.0126299	1.19542	0.560397	0.721646	0.560397	0.94712	1.19542	MRGRGEDDEEAERKKSPGAKKVPFLGMFRYAGRTDLALMAVGTAAAMANGMSEPLMTIIFAAVIESFGGSDSGTVLRRVSKVVMYYIYLGIWSAVASFLQVSCWTMAGERQSTRIRSLYLEAVLKQDVSFFDVEMTTGEAISRMSADTVLVQDALGEKVGKYVQLLTTFVGGFVIGFIRGWMLALVMLASVPPSILSFATVSRLRTQISARRQASYDDAGNVVEQNIGAIRTVVSFNGEKKAIALYNALIKRAYKATVFEGIVTGIGVGSIYFVVFCSYSLAFWYGAKLIISKGYTGGQVINVVFAILTGSMAIGNASPSISAIAEGQSAAHRLFEIINRKPKIDITDTSGIVLDDIKGNVELDNVFFRYPARPEQLILNGLSLQVPSGTTMAIVGESG…	60344.3	36198.7	66823.5	57994.6	55340.3	33914.2	34977.3	47476.6	43376.4	39936.1	32416.3	32043.7	21078.1	38511.9	31012.5	53476.8	64192.4	57141.5	34844.8	52413.9	73963	72923.2	56860.2	60872.3	66154.7
Bradi2g47400.1	3.72975e-05	0.000128731	0.00185838	0.997646	3.881e-05	0.528837	3.881e-05	0.981421	0.507697	0.654673	0.981421	0.507697	0.898661	MDAAAKGRDGEEQAVESGAEHGKKVSFAGLFRYADGTDLLLMLVGTVAALANGVSQPLMTVIFGDVIDAFGGATTANVLSRVNKAVLSFVYLGIGTAVVSFLQVSCWTITGERQATRIRSLYLKSVLRQDISFFDVEMTTGKIVSRMSGDTVLVQDAIGEKVGKFLQLVASFLGGFIVAFVKGWLLALVMLACIPPVVIAGGAVSKVLSKISSKGQTSYSDAGNVVEQTIGAIKTVVSFNGEKQAIATYNKHIHKAYKTAVEEGLTNGFGMGSVFFIFFSSYGLAIWYGGKLVLSKGYTGGQVITILMAIMTGAMSLGNATPCMTAFAGGQSAAYRLFTTIKRKPEIDPDDKTGKQLEDIRGEVELKDVYFSYPARPEQLIFDGFSLRVASGTTMAIVG…	73985.7	76578.2	99203.4	79593.7	82340.3	46849.8	48769	63234.9	56770	53905.9	66205.8	82085.2	83578.3	91372.5	80810.4	29657.1	46312.5	47253.2	43992.7	41803.9	83798.8	72811.6	73381	65992.6	73996
Bradi2g47530.1	2.93411e-05	0.00010499	0.327811	0.0243433	4.04986e-05	4.32086e-05	4.04986e-05	0.809343	0.252446	0.809343	0.639732	0.281579	0.252446	MPKGAKKRAKLKKKQQGDHPAGSEGGANGNNGSNNSSHGDAASDGNHLPIPLNIPPVDASEDSMESSEEMVTPRAEADEEEKKGAASEVPVERTDEVVQEDATGDAGEEVMVDALPPEAGQREQEGKVDVRAKAHVVVQEPEVQDVVVSEAPEVLEPEVKSEGVVVRETAKVHPVHEPETEGDEVVVRQTATTDVVQEPEAKGEVSRSREAASVQTTEVARGPAVAVAAAGHRAKWWNCCGVFDALAGSER	25083.3	38783	33184.9	20541.7	29398.2	29353.9	18997.7	22735.8	24085.5	23793.2	14878.6	15444.1	21500.4	23404.7	18807	13197.3	7679.84	6503.84	5730.69	8277.91	6610.5	5901.58	9205.77	7967.98	7421.46
Bradi2g47830.1	7.0297e-05	0.000215036	0.325303	0.0576511	0.000101332	0.00015114	0.000101332	0.759646	0.121259	0.759646	0.612418	0.121259	0.164815	MAAPNNNDAASASASTSEGAPAAPEDTSIEALARRVQEHMTLANNPSARRHKFWETQPVGQFRDAADVSLPDGAIEPPTPLSEVRADPYPLPAAFEWFTCDLDDDALLADLYALLAHNYVEDDENMFRFNYSPAFLRWALRPPSFFRAWHIGVRATESKKLVAFISGVPARIRARDDVVRMAEINFLCVHKKLRSKRLAPVLIREVTRRVHQENIWQAAYTAGVVLPTPITTCRYWHRSLNPKKLIDVGFSRLGPRMTMSRTVRLYKLPDAPLTPGFRQMELRDVAPVTRLLRAYLARYVVAPDFDELDVEHWLLPQEDVVDSYLVESPETHEITDFCSFYTLPSSVLNNPNYSTLKAAYSYYNVAVKTPLQQLMNDALIVAKQKNYDVFNALDVMENE…	45574.9	52444	85436.8	92940.2	69099	44502	81797.1	47434.2	36229.8	52490.8	41849.7	47818.6	41187.1	38414.5	42317.5	14870.4	11187.8	2796.05	4661.31	8378.87	14500.8	9521.99	14141.3	7390.19	11388.6
Bradi2g48570.1	3.7789e-05	0.000128731	0.0338279	0.000391559	7.57229e-05	4.00711e-05	4.00711e-05	0.654704	0.224201	0.654704	0.387781	0.261113	0.224201	MHNIRQYQLPLQRYMAMMDLQEGNERLFYKLLIDNVEELLPVVYTPTVGEACQKYGSIFSRPQGLYISLKEKGKILEVLKNWPERSIQVIVVTDGERILGLGDLGCQGMGIPVGKLSLYTALGGVRPSACLPITLDVGTNNEQLLNDEFYIGLRQRRAIGQEYADFLHEFMAAVKQNYGEKVLIQFEDFANHNAFDLLARYGTTHLVFNDDIQGTASVVLAGLVAALKLVGGTLAEHTYLFLGAGEAGTGIAELIALEMSRQTKIPIEECRKKIWLVDSKGLIVSTRKESLQHFKQPWAHEHEHVGNLLDAVNAIKPTVLIGTSGKGQTFTQEVVEAISSFNEMPIILALSNPTSQAECTAEQAYTWSKGRAVFATGSPFDPVEYNGKMYVPGQANNAY…	26329	48406.2	57610.2	40845.6	43297.7	20407.8	31114.5	23866.1	38000.4	28347.2	19555.2	17942.2	19189.1	10473.7	16790	11710.4	12302.1	11345.5	9864.5	11305.6	8823.32	11966.8	10607.1	7432.35	9707.39
Bradi2g49900.1	0.000760643	0.00166864	0.99912	0.924583	0.00276725	0.00848523	0.00276725	1.02311	0.473265	1.02311	0.921906	0.473265	0.541159	MAGGGGSGAYRAEDDYDYLFKAVIIGDSGVGKSNLLSRFTKNEFCLESKSTIGVEFATRSLQVDGKVVKAQIWDTAGQERYRAITSAYYRGAVGALLVYDVTRRSTFDNVARWLKELRDHTDPSIVVMLVGNKSDLRHLVAVSTEDGQEYAEAESLYFMETSALDATNVDNAFAEVLTQIYQIASRKTVDAGEDGSAAPSKGEKINVKDDVSALKRVGCCSN	13319.2	24645.8	24178.6	22323.3	21116.7	17410.9	20133.4	29226.9	19647.4	21604.7	18679.8	18148.3	24347.3	16695.1	19467.6	9524.23	9463.13	10597.1	10390.8	9993.81	8698.96	12513.6	13391.4	11106.1	11427.5
Bradi2g50380.1	0.00326084	0.0059364	0.79051	0.0361112	0.00417934	0.00568473	0.00417934	0.846193	0.304552	0.846193	0.495546	0.304552	0.335174	MARNVMDKATSIDAQLRLLAPNKLSEDDKLVEYDALLLERFLDILQDLQGEDIRETVQECYELAAEYENKLDPKQLDEIGNLLARLDGGDSIVIAKSFSHMLILANLAEEVQIAYRRRIKLKKGDFANENSATTESDIEETLKRLVGPLKKSPLEVFDALKNQTVDLVLTAHPTQSVRRIRNCLTQLYAKDITPYEKQELDEALQREIQGAFRTDEIRRAPPTPQDEMRAGMSYFHETIWKGVPKFLRRVDTALKNIGINERLPYNAPLIQFSSWMGGDRDGNPSVTPEVTRDVCLLARMMAANLYYAQIEDLMFELSMWRCSDELRSKADQLHRSSRKDTTKHYIEFWKQVPLSEPYRVILSDVRDKLYNTRERSCHLLASGFSEIPDEAIFTDVEQF…	10359	12607	13684.4	9255.79	11476.5	15059.3	11899.5	4278.01	7608.64	9711.36	6272.01	5057.8	2050.03	9368.74	5687.15	4264.41	5339.31	2752.57	1624.54	3495.21	4858.6	2183.4	3571.87	4772.66	3846.63
Bradi2g50500.1	8.48038e-06	3.83894e-05	0.0166916	1.21256e-05	4.70183e-05	2.12133e-05	1.21256e-05	0.775445	0.49509	0.775445	0.49509	0.568554	0.52679	MPSANVRAARPSADRRLSTLVRHLLPSSARTTTAAAAATTTTATSADSSASLRAFPTMASSSVFAGVPQGPEDPILGVTVAFNKDPSPVKVNLGVGAYRTEEGKPLVLNVVKRAELQMIKNPSLGKEYLPITGLADFNKLSAKLIFGADSPAIQENRVVTVQCLSGTGSLRVGGEFLARHYHERTIYIPQPTWGNHPKVFTLAGLTARSYRYYDPATRGLDFQGLLEDLSSAPEGAIVLLHACAHNPTGVDPTLDQWEQIRQLMRSKALLPFFDSAYQGFASGDLDKDAQSVRMFVADGGELLMAQSYAKNMGLYGERVGALSIVCGSADVAVKVESQLKLVIRPMYSNPPLHGATIVATILNNRDMFEEWTIELKGMANRIISMRQQLFNALNIRGTP…	149171	223432	214940	173274	190204	127015	143986	156636	162335	147493	102341	99814.5	85020.6	89496.2	94168.1	116470	97137.7	112713	106245	108141	102247	105782	105267	87495.1	100198
Bradi2g50850.1	0.000502335	0.00115051	0.00273911	0.000561887	0.00101483	0.00036872	0.00036872	0.271739	0.105532	0.271739	0.133314	0.203455	0.105532	MAPLTPRLVVPIDVKKKPWEQKVHLHNRWHPDIPPVADVTEGELFRVEMVDWTGGRVSDDNSADDIKFLDLTITHYLSGPFRVIDAEGIPASPGDLLAVEICNLGPLPGDEWGYTAIFERENGGGFLTDHFPSARKAIWYFEGIYAYSPQIPGVRFPGLTHPGIVGTAPSAELLNIWNERERQLTETGHESLKLCEVLHQRPLANLPTPENCLLGKVQEGTAEWQKIANEAARTIPGRENGGNCDIKNLSRGSKVYLPVFVDGANLSTGDMHFSQGDGEVSFCGAIEMSGFLELKCEIIRGGMKEYLTPVGPTPLHVNPIFEIGPVEPRFSEWLVFEGISVDESGKQHFLDASVAYKRAILNAIEYLSRFGYSKEQVYLLLSCCPCEGRISGIVDAPNA…	8421.51	5947.65	4297.67	3665.39	5583.06	0	822.005	2724.94	2521.59	1517.13	494.079	1147.33	742.263	593.516	744.298	0	9.52752	3282.27	1251.81	1135.9	0	46.0415	1106.82	1203.9	589.189
Bradi2g52790.1	0.00511656	0.00874809	0.0638547	1	0.0202042	0.968483	0.0202042	1.06085	0.591364	0.66791	1.00162	0.591364	1.06085	MREILHIQGGQCGNQIGAKFWEVVCDEHGIDPTGRYTGTSDLQLERVNVYYNEASCGRFVPRAVLMDLEPGTMDSVRTGPYGQIFRPDNFVFGQSGAGNNWAKGHYTEGAELIDSVLDVVRKEAENCDCLQGFQVCHSLGGGTGSGMGTLLISKIREEYPDRMMLTFSVFPSPKVSDTVVEPYNATLSVHQLVENADECMVLDNEALYDICFRTLKLTTPSFGDLNHLISATMSGVTCCLRFPGQLNSDLRKLAVNLIPFPRLHFFMVGFAPLTSRGSQQYRALTVPELTQQMWDSKNMMCAADPRHGRYLTASAMFRGKMSTKEVDEQMINVQNKNSSYFVEWIPNNVKSSVCDIPPTGLSMASTFIGNSTSIQEMFRRVSEQFTAMFRRKAFLHWYT…	32043.1	30348.8	49938.6	35280	36902.6	15778.6	27396.9	29847.1	25567.8	24647.6	28453.8	39309.8	43671.2	36415.3	36962.6	18316.4	22598.5	28971.5	17405.1	21822.9	40546.7	43500.9	42248.2	30296.9	39148.2
Bradi2g53180.1	0.00044431	0.00103698	0.096568	0.0280168	0.000272541	0.000536505	0.000272541	0.763735	0.460751	0.763735	0.699185	0.460751	0.494661	MDFLLGRSVETMVAVAVAVVAVAVGGAFLLRRSKKPKGCLDPENFKEFKLVEKKQISHNVAKFRFALPTPTSVLGLPIGQHISCRGQDATGEEVIKSYTPTTLDCDLGNFQLVIKMYPQGRMSHHFREMKVGDYMSVKGPKGRFKYQVGQVRAFGMLAGGSGITPMFQVARAILENPNDKTKVHLIYANVTSEDILLKEELDSMAEDYPDRFKIFYVLNQPPEVWNGGVGFVSQEMIKTHCPAPAEDIQILRCGPPPMNKAMAAHLEALGYTNEMQFQF	7607	8957.71	5656.06	5335.23	6889	5043.04	4933.13	5970.6	5098.7	5261.37	4414.81	5453.08	3529.06	5869.77	4816.68	3043.81	3741.49	3526.21	2384.94	3174.11	3718.27	3122.01	3613.76	3176.84	3407.72
Bradi2g53220.1	1.29543e-07	1.61809e-06	0.0371614	1.15683e-06	2.43978e-08	8.98133e-06	2.43978e-08	0.8029	0.34419	0.8029	0.395916	0.34419	0.399759	MVLKTELCRFSGQKIYPGKGIRFIRADSQVFLFANSKCKRYFHNRLKPAKLTWTAMYRKQHKKDIHAEAAKKRRRTTKKPYSRSIVGATLEVIQKKRAEKPEVRDAAREAALREIKERIKKTKDEKKAKKAEVTKSQKSQMKGAAQKGAKGPKLGGGGGKR	89383.7	112895	94130.7	82373.4	94695.6	68244.7	75823.5	91615.3	68441	76031.1	42413.1	40376.3	22762.6	44414.2	37491.6	32524	30438.6	31519.6	35891.1	32593.3	31032.5	42400	37710.6	40278.5	37855.4
Bradi2g53340.3	8.45853e-06	3.83894e-05	0.000121854	7.31243e-07	1.38375e-05	8.00824e-06	7.31243e-07	0.72003	0.630984	0.72003	0.630984	0.66099	0.672114	MASSGSSWTLPDHPKLPKGKTVAVIVLDGWGEASPDKYNCIHVAQTPVMDSLKNGAPEKWTLVKAHGTAVGLPSDDDMGNSEVGHNALGAGRIFAQGAKLVDAALASGKIYEGAGFNYIKESFDKGTLHLIGLLSDGGVHSRLDQVQLLLKGASERGAKRIRLHILTDGRDVLDGSSVGFVETIENDLSQLREKGVDARIASGGGRMNVTMDRYENDWGVVKRGWDAQVLGEAPYKFQSALEAVKTLRAEPKANDQYLPPFVIVDESGKSVGPIVDGDAVVTFNFRADRMVMLAKALEFADFDKFDRVRVPKIKYAGMLQYDGELKLPSKYLVDPPLIERTSGEYLVKNGVRTFACSETVKFGHVTFFWNGNRSGYFDETKEEYVEIPSDSGITFNEQP…	420148	497569	505876	403018	456653	319689	332745	323842	338940	328804	300611	295682	252035	304234	288141	334618	307950	299975	264829	301843	283059	298227	340808	305597	306923
Bradi2g54730.1	1.46652e-07	1.74704e-06	0.000437248	0.671384	7.14368e-08	1.24423e-06	7.14368e-08	0.949961	0.527376	0.755929	0.949961	0.527376	0.644406	MESSGTEAAMAAAAAAVGGYGGCGGWETPKREECRIPATLPCPAAPRKAVPDFGKPRGPPKNGYFQPPDLEALFALAPRRQASCA	34412.5	33346.3	36795.5	30137.8	33673	28684.1	23849	23001.7	26282.9	25454.4	30566.5	33571.4	30822	32992.4	31988.1	15874.2	15671.3	20676.9	18811.1	17758.4	22757.6	19328.4	22455.4	22254.9	21699.1
Bradi2g55120.1	4.15083e-06	2.23087e-05	0.111282	0.0469805	0.000195055	0.657822	0.000195055	1.7521	0.621461	0.684999	0.621461	1.7521	1.14942	MSAADKVKPAATPGSADPAAIAGNISYHAQYSPHFSPFAFGPEQAFFSTAESVRDHLLQRWNDTYVHFHKTDPKQTYYLSMEYLQGRALSNAVGSLGITGAYAEALKKFGYELEAIAGQERDAALGNGGLGRLASCFLDSMATLNLPAWGYGLRYRYGLFKQIIAKEGQEEFAEDWLDKFSPWEIVRHDVVYPIRFFGHVEISPDGTRKWAGGEVMSALAYDVPIPGYKTKNAISLRLWDAKATAQDFNLFQFNDGQYESAAQLHSRAQQICAVLYPGDATEEGKLLRLKQQYFLCSASLQDIIFRFKERKPDRVSGKWSEFPSKVAVQMNDTHPTLAIPELMRLLMDEEGLGWDEAWDVTNKTVAYTNHTVLPEALEKWSQTVMRKLLPRHMEIIEEI…	127963	106019	109659	88374.9	108004	80515.2	73378.9	67593.2	74443.7	73982.7	75735.2	60602.6	56596.2	75547.8	67120.4	238732	191507	187386	139314	189235	118415	114653	142527	120972	124142
Bradi2g56347.1	1.19061e-06	8.82491e-06	1.88604e-05	3.93491e-05	6.3096e-07	4.89519e-08	4.89519e-08	0.346134	0.0624945	0.319754	0.346134	0.118593	0.0624945	MDTNTQGLLLPRSDGAVPGVVDFRGGPAPRASTGRWSAAMFVLGVEIAERFAYHGVSANLISYLTGPLGESTAGAAAAINAWSGVATMLPLLVACVADAWLGRYRTIVLASLLFVVSMGMLTLSSALPAFHSDGCSSFTSKSLACSPSPVQVTIFYISLYLVALAEAGHKPCAQAFGADQFDQHHPKESVSRSSFFNWWYFGMCSGTAATTMVSSYIQDNIGWGLGFGIPCLVMVFALAMFLLGTRRYRYYTSTRSSPFARLARALIALIRGSKSSQSDNALASEDDEFNTEHREEVRGLLRLFPIWATCIIYAVIFSQSSTFFTKQAATLDRRIGQSFKVPPAALQTFISVTIITFIPVYDRLFVPVARRFTRLSSGITMLQRIGTGLVLAMVAMAVA…	42645.1	82853.6	88781.4	69501	70945.3	18627.8	15060.6	26301.5	30750.1	22685	20879.9	21875.9	19961	35509.5	24556.6	10055.4	9339	7452.58	6807.53	8413.61	3028.93	5227.64	4784.14	4694.04	4433.69
Bradi2g56360.1	0.0264209	0.0365933	0.0460797	0.9323	0.429083	0.020234	0.020234	0.871923	0.316771	0.406234	0.871923	0.689581	0.316771	MGDTVSGAADYRGQPASRAATGGWKSSIFVMAMEIAERFAYKGVASNLIQYLTGPLGQPMARAAASIDAWKGVSQMLPLPLACIADAWLGRYRAIVLASILFILSMGTLSLSSAVRIFGAGGHVAVFYVALYLVALGEGAHKPCAQAFAADQFDDKDPKESVARSSFFNWWYLGMCSGTAVTIMVSSYVQDNVGWGLGFGIPCIVIAVSLAVFLLGTRSYRYYTTKEPSPVARVGKAFFTLIKSWRSKHRTNPASSAKVEGGDSAEDLVEEVKSVFRLLPIWASCIIYAIIFSQTSTFFTKQAATLDRRIGPSFKVPPAALQTFISISIVVFIPVYDRLFVPLARRYTGRPSGITMLQRVGVGLALSLAAVVLSALVEMKRLRVASAAGLVNTPKTQLP…	5402.47	9716.87	16491.9	22062.8	13418.5	3085.59	3275.75	6003.79	9439.1	5451.06	12510.3	17286.6	7039.17	9963.59	11699.9	8674.69	10102.1	9557.36	8678.49	9253.15	3809.09	4468.5	5039.71	3685.09	4250.6
Bradi2g56890.1	3.84022e-05	0.00013049	0.990034	0.0158053	0.000184876	0.000616469	0.000184876	1.02385	0.61374	1.02385	0.771422	0.61374	0.659652	MEHVARFFFGVSGNVIALFLFLSPVVTFWRIIRKRSTEDFSGVPYNMTLLNCLLSAWYGLPFVSPNNILVTTINGAGSVIEAIYVIIFLIFAERKSRLRMTGLLGLVTSIFTTVVLVSLLALHGQARKVFCGLAATVFSICMYASPLSIMRLVIKTKSVEFMPFLLSLSVFLCGTSWFIYGLLGRDPFIAIPNGCGSFLGLMQLILYAIYRNNKGTGAGAGKAVDEVEDAKKATVAMEMAETKVAVDEPAAVDKVAAQV	246459	235559	257259	227250	241632	244718	214595	284725	245535	247393	177208	165608	180582	222203	186400	109176	163754	170812	149454	148299	179277	131063	159555	167676	159393
Bradi2g57500.1	2.85484e-06	1.71927e-05	0.0011015	2.23241e-07	4.61226e-05	2.58427e-05	2.23241e-07	0.718974	0.463353	0.718974	0.463353	0.561515	0.607872	MAGKRELVISFGEMLIDFVPTVAGVSLAEAPAFVKAPGGAPANVAIAVARLGGAAAFVGKLGDDEFGRMLAGILRDNGVDASAVVFDSGARTALAFVTLRADGEREFMFYRNPSADMLLTAAELNVELIKKAAVFHYGSISLIAEPCRTAHLRAMEIAKGAGALLSYDPNLREALWPSRDEARTKILSIWDQADIVKVSEVELEFLTGIDSVEDNVVMKLWRPTFKLLLVTLGDQGCKYYTKDFRGVVPSYKVQQVDTTGAGDAFVGALLRKIVHDPSSLQDQKKLVEAIKFANACGAITATKKGAIPSLPTEVEVLRLIEKA	62638.7	86070.1	80057.5	70550	74829.1	45542.1	55196.9	53946.1	60515.7	53800.2	32548.9	36977.6	26869.1	42293.5	34672.3	42605.9	43559.5	37591.3	44314	42017.7	49135.7	45428.8	45040	42341.3	45486.5
Bradi2g57537.1	0.0221564	0.0312647	0.149099	0.0507878	0.0208498	0.00951805	0.00951805	0.688184	0.476599	0.688184	0.60218	0.535691	0.476599	MGSSRCRGQRQLQLWFRFLALSSLLLLASGEVIFEERFEDGWETRWVKSDWKRSEGKAGTFKHTAGKYSGDPDDKGIQTTIDARHFAISAKIPEFSNKGRTLVVQYSIKFEQDIECGGGYIKLMSGYVNQKKYSGDTPYSLMFGPDICGTQTKKLHLILSYQGQNYPIKKDLQCETDRLTHVYTFILRPDASYSILVDNRERESGSMYTDWDILPPRKIKDVDAKKPKNWDDREYIEDPDEVKPEGYDSIPREIPDPKDKKPDTWDDDDDGIWKPRRIPNPAYKGQWKRKNPNYKGKWKIPWIDNPEFEDDPDLYVLKPLKYIGIEVWQVKAGSVFDNILICDDPEYAKKVAEETWGANKEAEKEAFEEAEKERKAREDKEAQQAREEGERRRRERGDR…	18305.4	14511.8	10395.8	6390.37	12400.9	9378.8	6905.72	8205.87	9645.86	8534.06	7179.27	5711.01	8186.04	8793.85	7467.54	6958.5	5662.98	6524.14	7426.48	6643.02	6584.29	3544.11	6868.28	6644.24	5910.23
Bradi2g57664.1	0.00208969	0.00402139	0.0143648	0.917951	0.00343259	0.00907642	0.00343259	0.936496	0.590459	0.663272	0.936496	0.590459	0.639626	MGAMSRRVLPACSSLCYFCPSLRARSRQPVKRYKKIISEIYQLPPDGEPNDRRIGKLCDYVSRNPTRIPNITEYLEQRCYKELRHENFTLVKVVPCIYRKLLRSCKEHTPLLATSTMCIVRTLLDQKSNDDLQVLGCLMLVDFLNGQVDSTHMFSLEGLIPKLCRIGQESREDDKGLRLRSAALQALACMVEYMGEHSHISMELDEVVSVIISCYEANQTLSIKEVVRLQDEDDLTMLAVSGQNSAKLASDIRSASENPAHWARVCLRNMANIAKEATTVRRILDPLFRLFDSHNYWSPENGVALSVLQEMQTLMDKSGQNGHLLLSFTIKHIDHKSVAKMPINQISIIKVATHLAKHAKSQASVTVASAISDLIKHLRKCMYCATEASNSQADVDEWN…	30091.8	37787.2	40400.3	23143.5	32855.7	18550.1	23196.3	19009.7	26413	21792.3	24289.8	30434.4	31247.5	37105.2	30769.2	17437.2	20335.3	20536	19291.3	19399.9	19706.2	23695.3	19945.3	20714.7	21015.4
Bradi2g58050.1	1.87663e-07	2.10964e-06	0.00146743	6.6081e-06	1.0495e-09	5.81429e-09	1.0495e-09	0.778068	0.502194	0.778068	0.619094	0.502194	0.522224	MSAYCGKYKDELIKNAAYIGTPGKGILAADESTGTIGKRFASINVENVEDNRRALRELLFCTPGALQYISGVILFEETLYQSTKAGKPFVDVLKENNVLPGIKVDKGTIEIAGTDKETTTQGHDDLGKRCAKYYEAGARFAKWRAVLKIGPNEPSQLSIDLNAQGLARYAIICQENGLVPIVEPEILVDGPHDIDRCAHVTEVVLAACYKALNEHHVLLEGTLLKPNMVTPGSDSKKVAPEVIAEYTVRTLQRTVPPAVPAIVFLSGGQSEEEATLNLNAMNKLQTKKPWFLSFSFGRALQQSTLKAWAGKEENIEKARQAFLVRCKSNSEATLGTYKGDATLAEGASESLHVKDYKY	1.39331e+06	1.79957e+06	1.81338e+06	1.62348e+06	1.65744e+06	1.21818e+06	1.27526e+06	1.32673e+06	1.33823e+06	1.2896e+06	1.08219e+06	1.05687e+06	918113	1.04727e+06	1.02611e+06	981580	881939	737528	728375	832355	810844	796898	953711	900763	865554
Bradi2g59070.1	0.00556161	0.00943725	0.0352736	0.0493476	0.00125967	0.0154176	0.00125967	0.741789	0.566312	0.725305	0.741789	0.566312	0.684425	MQARREIRTREERRDDEHGPVPETPLGSARWSPEAEIGMRVEDIWDSLEQSPEQQQLSRGDKLNSCFDAIPVSSFPQTFGSQLVDIPSDATLAEAVDILSRNRINGAPVRNVDAPDDASWIDRYIGIVEFAGIAVWLLHQSEAGAGAALGADELAAKLGTVALEGPKAQPPAAASMEAEAAVAEAFGSLPSSELFKRTKVKDISGSFRWAPFLALQSSDTFLTMLLLLSKYRMKSLPVVDIGEGTISNIITQAAVVHMLSECVGLSWFEDWGTKTLSDLGLPIMKPSRLVKVREDESALKAFRQMRKRGVGGIPVVDGADKPMGSIMIKDVKHLLTASEANRDYRTLTAKEFIASARQSSGEKQMSIITCTGDDTVKDIILRLDAEKRQRIYVVDAEGN…	8776.12	8565.13	5301.73	6436.74	7269.93	4897.65	4734.72	6864.03	4595.26	5272.92	5287.76	5415.6	5324.01	5543.64	5392.75	3525.48	4176.65	3632.78	5133.3	4117.05	5072.13	4340.47	5239.23	5251.06	4975.72
Bradi2g59850.1	0.000113538	0.00031909	0.108805	0.0020816	0.000127164	0.000150647	0.000127164	0.781362	0.442298	0.781362	0.584909	0.457477	0.442298	MAAPAIKLYGLALSPNVVRAAAVLNEKGLDFEIVPVDLTTGAHKQPDFLALNPFGQIPALTDGDEVLYESRAINRYIAEKYRATGTDLLPPASASAKLEVWLEVESHHFYPAVSPLVFQLLIKPMLGGAPDAAAVEKHAGELARVLDVYEAHLAKPGNRFLAGEQFTLADANHMSYLFMLGKTAQAGLVESRPRVKAWWDEISARPAWAKTVAAIPFPPAA	91426.9	130416	110619	74980.6	101861	73500.2	74849.4	76634.2	93376.2	79590	51740.8	63832.7	52081.9	70661.5	59579.2	48699.8	61081.2	36997.4	39617.2	46598.9	35179.2	43138.6	54520.3	47372.9	45052.7
Bradi2g60910.1	0.00487943	0.0083745	0.0222539	0.26124	0.00229706	0.00798534	0.00229706	0.756208	0.415793	0.572714	0.756208	0.415793	0.501434	MSTAKVLDPAFQGAGQKVGIEIWRIEDFKPVPLPKSDYGKFYCGDSYIVLQTTSPKGGAYLYDIHFWIGKDSSQDEAGTAAIKTVELDSILGGRAVQHRELQGYESDKFLSYFKPCIIPMEGGFASGFKTPEEDKFETRLYICKGRRAIRIKEVPFARSSLNHDDVFILDTESKIYQFNGANSNIQERAKSLEVIQHLKEKYHGGVCDVAIVDDGKLQAESDSGEFWVLFGGFAPIGKKTVSDDDVVLETTPPKLYSINDGQLKLEDTALTKAVLENTRCFLLDCGAEMFVWVGRVTQLDDRKATTKAVEEFIIDQKRPKTTRVTQVIQGYESHAFKSKFESWPVGNVAGNSGAEDGRGKVAALLKQQGVDVKGAAKSSTPINEEVPPLLEGGGKLEVW…	80686.3	77165.9	76521	31634.2	66501.9	33447.5	52272.2	22738.7	43888	38086.6	45741	45723.3	49160.5	60532.2	50289.2	36897.3	22021.4	30082.6	21602.8	27651	30538.7	30617.2	35201.9	37027.5	33346.3
Bradi2g61400.1	2.3482e-07	2.45559e-06	0.99963	0.00511243	2.94157e-05	1.00322e-06	1.00322e-06	1.01075	0.330151	1.01075	0.71535	0.496038	0.330151	MGHSASRHNNGAGAEPPLPSRFARFRTRLRLRHRHSARDSDRDRDGAAADSGSRPAVAVAADEFAGIARIRIVKADMRLKDKFFACLSLGERTYRTETSDNTHRPVWNSEKKVVVETNGPHIARISVFETNRFSKNTLVGYCEVDLFDLLTKDLDKEHIEDLALLDPSSSTNTMGTISISCHIEDPVETEQSFARRVLAIVDYNEDGKLSLSEFSDLMKAFGNGLAVNKIEELFRQADTNGDDIVDMDELAALLADQQEKEPIISNCPVCGESLGKYDNINDMIHMTLCFDEGTGNQIMTGGFLTDKQASYGWMFKLSEWANFSSYDVGLRSGSTASHILVFDRRTKRLVEEAIDGKIVLSMRALYQSKVGLTLIDTGVKDILKNLSEKQGKKMNSPES…	14935.8	17168.1	16674.1	17511.8	16572.4	15690.7	18346.2	15983.9	16981.9	16750.7	12327.4	15053.8	9158.18	10881	11855.1	10957.8	7510.81	8316.97	6096.61	8220.55	5979.38	3960.91	5036.35	6908.99	5471.41
Bradi2g61560.1	1.13887e-05	4.77125e-05	0.0844557	0.00042814	7.56292e-06	6.04973e-05	7.56292e-06	0.815778	0.469753	0.815778	0.606779	0.469753	0.48042	MIISKKNRREICKYLFQEGVLYAKKDYNLAKHPQVDASNLEVIKLMQSFKSKEYVRETFSWQHYYWYLTNDGIEFLRTFLNLPSEIVPNTLKKSAKPPSRPFGSGPPGDRPRGPPRFEGDRPRFGDRDGYRGGPRGAPGDFAGEKGGAPAEFQPSFRGGSRPAFGRGGGGGTFGAGASSME	311058	444923	410606	345901	378122	239629	319778	334126	340321	308464	216247	261100	184526	255873	229436	214456	178148	151298	166595	177624	187045	159672	187034	192879	181657
Bradi2g61940.1	6.75347e-05	0.000207055	0.0020544	0.000180483	4.89668e-05	0.000127584	4.89668e-05	0.415032	0.158831	0.415032	0.257627	0.168761	0.158831	MSSSPGSLGRTDLDGNPVAPLTICMIGAGGFIGSHLCEKLMAETAHVVLAVDVYCDKIRHLVDPAPPHLSGRISFHRLNIKNDSRLEGLIKMADLTINLAAICTPADYNTRPLDTIYSNFIDALPVVKYCSENNKRLIHFSTCEVYGKTIGSFLPKDHPLRKEAEFYVLKEDESPCIFGPIVKQRWSYACAKQLIERLIFAEGAENDLEFTIVRPFNWIGPRMDFIPGVDGPSEGVPRVLACFSNNLLRREPLKLVDGGESQRTFVYIKDAIEAVHLMIENPARANGHIFNVGNPDNEVTVRELAEMMIEVYANVSGEPPLDEPLIDVSAKQFYGEGYDDSDKRIPDMTLINKQLGWNPKTPLKDLLETTLTYQHKTYKEAVKRQMSQATASS	15325.8	20255.5	35099.3	21678.2	23089.7	9775.85	15572.4	5377.52	7606.07	9582.97	4538.01	8716.8	5360.98	5178.4	5948.54	2855.32	4141.62	4979.28	3610.34	3896.64	4503.63	2509.85	4062.89	3593.1	3667.37
Bradi2g62010.1	6.24625e-07	5.33303e-06	0.0252311	2.4623e-06	3.02243e-08	2.65304e-06	3.02243e-08	0.830305	0.481255	0.830305	0.599228	0.481255	0.586228	MASEGSSKVFTLEEVAKHSSKDDCWLIISGKVYNVTKFLDDHPGGDDVLLSSTAKDATDDFEDVGHSTTARAMMDEYYVGEIDATTIPTKVKYTPAKQPHYNQDKTPEFVIKILQFLVPLAILGLAVAVRIYTKSESA	350723	405461	402213	319955	369588	253275	288296	346530	339383	306871	212260	218312	203680	251619	221468	183291	176727	172765	178681	177866	220243	214000	219999	212410	216663
Bradi3g00450.1	1.03241e-05	4.40734e-05	1.96373e-05	2.00717e-05	0.000121888	6.03084e-06	6.03084e-06	0.407511	0.258211	0.258211	0.307257	0.407511	0.267374	MLSFVECNLPWKNLGQMSGNCDMKEIRNQLCDFFMDELDAMHAPRSFGSTPDFSPNKSERGNGKFSSNYAKFKNSFAEDKNDAPPALDKETEDDSYRIPEEDIAFSTEHLGFDHSDKGIDITVFRSDLCNLNNLKVLDASLMRCWTVHLIEKCRKEQIEIGFLDPHVMSYQTIEGGSKENQSEETERAKVRVLRYLADALVVQQDKRFIIFAHNDYYHWITIAIIPSSSEVYYLDSKKKVRNWEKMQKFIDQAWALDHADGPKLSHHFGFDCDQQTETDTVKCGYYACHNMLLIAEWTLANKEGFPVKLGACDAEMVSSQLKKFLDMKIKAEKNKPASQANSAPPMEKEQASQSSSEPPKKSLKIKKKQE	111437	256232	220698	218101	201617	48564.4	52254.2	39985.2	67435.2	52059.7	55475.6	58500.3	71815	62001.9	61948.2	77038.2	92833.5	79610	79162.6	82161.1	67604.3	56122.7	48887.2	43014.1	53907.1
Bradi3g00500.1	0.000360085	0.000863309	0.426564	0.0101374	0.00104145	0.000278869	0.000278869	0.823102	0.345225	0.823102	0.567275	0.430251	0.345225	MDTQVKLAVVVKVMGRTGSRGQVTQVRVKFLDDQNRLIMRNVKGPIREGDILTLLESEREARRLR	62723.2	148492	114463	117254	110733	62033.5	102780	100664	99101.8	91144.6	60903.7	70309.8	53050.4	67000.6	62816.1	44984.2	52900.5	42169.5	50518.1	47643.1	25597.9	42115.5	36823.1	48374.8	38227.8
Bradi3g00950.1	0.0294996	0.0403191	0.395201	0.930333	0.692144	0.0395789	0.0395789	1.07512	0.645147	0.812025	1.07512	0.870864	0.645147	MAVLNLLALIFATLLLLLRRSTGAGAGISSDTLKNGGNITDGETLLSAGGSFTLGFFTPSTTVPTKRYLGIWFTASGTDAVLWVANRDTPLNTTSGVLVMSSRARVGLRLLDGSGQTAWSSNTTGASASSVAQLLESGNLVVREQSSSASTGFQWQSFDHLSNTLLAGMRFGKNLKTGLEWSLTSWRAKDDPATGDYHRVMDTRGLPDIVTWHGSAKKYRAGPWNGRWFSGVPEMDSQYKFFYIQMVDGPDEVTYVLNATAGTPFTRVVLDEVGKVQVLLWIPSSREWREFPWLPRDACDDYASCGAFGLCNVDAASAPSCSCAPGFSPVNLSEWSRKESSGGCQRDVQLECGNGTAATDRFTPVHGVKLPDTDNATVDMGATLEQCRERCLANCSCVA…	204821	160962	205630	122983	173599	132401	159867	107534	164065	140967	163588	155602	212615	214757	186640	140102	105940	192793	165889	151181	106965	107418	121955	111649	111997
Bradi3g01210.1	0.000195303	0.00051059	0.135982	0.000302433	0.000174241	0.00139564	0.000174241	0.806998	0.516511	0.806998	0.519755	0.516511	0.599054	MAVGKNKRISKGRKGSKKKIVDPFTKKEWYDIKAPLLFNTRNVGKTLVSRTQGTKIASEGLKHRVFEVSLADLQNDEDQAYRKIRLRAEDVQGRNVLTNFWGMDFTTDKLRSLVKKWQTLIEAHVDVKTTDNYMIRMFCIGFTKRRPNQVKRTCYAQSSQIRQIRRKMVEIMINQAASCDLKELVAKFIPEVIGKEIEKATSSIFPLQNVYVRKVKILKAPKFDLGKLMEVHGDYGKEDVGVKLDRPAEGDEAIPGAEEVAAPAE	27584.6	39755.8	42805.5	34546.3	36173	20885	28978.2	33935.9	32967.1	29191.6	19317.6	20042.9	16336.7	19507.3	18801.1	22373.5	20138.8	15957.7	16265	18683.8	23077.1	16892.1	23086	23623.2	21669.6
Bradi3g01470.1	7.23718e-05	0.000220383	0.960281	0.00987169	0.000118733	0.000448719	0.000118733	0.934615	0.259975	0.934615	0.542861	0.259975	0.358547	MDPCKYRPSSSFDKKTTTTNAGAPVWNDNEALTVGHRGPILLEDYHLLEKVAHFARERIPERVVHARGASAKGFFECTHDVTDLTCADFLRAPGARTPVIVRFSTVIHERGSPETIRDPRGFAVKFYTREGNWDLLGNNFPVFFIRDGIKFPDVIHAFKPNPRSHVQEYWRVFDFLSHLPESLHTFFFLFDDVGIPTDYRHMEGFGVNTYTFVTREGKSKYVKFHWKPTCGVSCLMDDEATLVGGKNHSHATQDLYDSIDAGNFPEWKLFVQVMDPDEEDKYDFDPLDDTKTWPEDLLPLRPVGRLVLDRNVDNFFNENEQLAFGPGLIVPGIYYSDDKMLQCRVFAYADTQRYRLGPNYLMLPVNAPKCGHRNAHFDGAMNFMHRDEEVDYYPSRHAP…	19930.2	36884.4	36358.9	30379.3	30888.2	16667.6	37337.2	30542.2	30927.5	28868.6	17044.1	13969.6	20751.8	15306.5	16768	5310.17	7099.56	7906.4	11804.5	8030.16	12090.3	11387.9	12485.9	8335.45	11074.9
Bradi3g01477.1	3.24375e-06	1.89547e-05	0.0217564	5.10429e-05	4.94939e-06	1.38173e-05	4.94939e-06	0.772986	0.393189	0.772986	0.564815	0.393189	0.494057	MDRVRGSLLLLGVLLAGSLFAFSAAKEEAKKLGTVIGIDLGTTYSCVGVYKNGHVEIIANDQGNRITPSWVGFTDSERLIGEAAKNQAAVNPERTIFDVKRLIGRKFEDKEVQRDMKLVPYKIVNRDGKPYIQVKIKDGENKVFSPEEISAMILGKMKETAEAYLGKKINDAVVTVPAYFNDAQRQATKDAGVIAGLNVARIINEPTAAAIAYGLDKKGGEKNILVFDLGGGTFDVSILTIDNGVFEVLATNGDTHLGGEDFDHRIMEYFIKLIKKKYSKDISKDNRALGKLRREAERAKRALSNQHQVRVEIESLFDGTDFSEPLTRARFEELNNDLFRKTMGPVKKAMDDAGLEKSQIHEIVLVGGSTRIPKVQQLLRDYFEGKEPNKGVNPDEAVA…	717242	856625	713683	565913	713366	460810	558772	535164	650940	551421	363196	357001	423849	467631	402919	269089	229892	313621	309348	280487	385321	290999	376685	356767	352443
Bradi3g01600.1	4.51388e-08	6.7658e-07	0.00672216	1.87295e-06	5.32855e-10	1.80123e-08	5.32855e-10	0.730133	0.196458	0.730133	0.390019	0.196458	0.28693	MVKHNNVIPNGHFKKHWQNYVKTWFNQPARKQRRRIARQKKAVKIFPRPTSGPLRPIVQCQTLKYNMKARAGRGFTLEELKAAGIPKKLAPTIGISVDHRRKNRSLEGMQSNVQRLKTYKAKLVIFPRRARKVKAGDSTPEELATATQVQGEYMPITRGEKRSIEVVKVTDEMKAFKAYGKLRVERMNQRQVGARMKKAAEAEKDEKK	216770	325432	329466	263664	283833	187538	213689	207434	220283	207236	113422	137004	71402.4	120973	110700	70635.6	63646.2	51753.3	37010.4	55761.3	77265.3	74598.3	94401.1	79495.9	81440.2
Bradi3g02860.1	2.6087e-09	8.79785e-08	0.881509	9.36406e-05	9.3871e-09	5.9019e-11	5.9019e-11	1.05223	0.167798	1.05223	0.516075	0.233248	0.167798	MEGQTFGGGGGGNWVSAPYPGTQAKESPFVFDAKPAPQQLQLFGNTAVGTSGYYNYNGNNHLPIMNQARNTCNYTVDEKKLKLQMSLNSFPPGDADRLPCTGNSSAVSTGLRLSYEDNERNSSIASGSGSMSSLPTTRPEIDAIMAEMEKENKEIDYYFRVQVEQLCKHVREMKQKQMVSFVASVERRFGKRLREKELELETMNKKSKELNEQIRQVAMEVQSWQSAALYNQSVASSLKTQLMQVVAEQANLTREGTGDSEEENAGSGQNINATPGGFFESSLLLGGSKSTAAGALRAACRWCGAKEASVLVMPCRHLCLCTDCEKVTDACPVCRFPKSGSVEINMS	13627.7	14324.6	10836.8	11229.7	12504.7	13419	13983.4	11843.9	13384.8	13157.8	7208.95	8452.53	6195.88	3956.09	6453.36	3553.03	3477.02	1684.45	2952.27	2916.69	2051.88	1757.08	2439.71	2144.38	2098.26
Bradi3g03040.1	8.32271e-05	0.000246476	0.00191763	1.43345e-05	0.000120721	0.000494379	1.43345e-05	0.645895	0.460707	0.645895	0.460707	0.53626	0.581708	MFRNQYDTDVTTWSPAGRLFQVEYAMEAVKQGSACVGLRSATHAVLAAANKSANELSSHQRKVFRVADHAGVALAGLTADGRVLSRFLRSECINHAFVYDAPLPVSRLALRLADKAQVCTQRSWKRPYGVGLLVAGLDESGAHLYYNCPSGNYFEYQAFAIGSRSQAAKTYLERRFEKFNDYTPDQLIRDALSAIKETLQGEKLTSSNCTISIVGRKDDGTVEPFSVIDAKRIQEIIDSMEAADEVPPADAPAESSSMQEGDDTGAAGADPAAPADAPAPMDI	43324.2	39150.5	50665.7	28676.3	40454.2	23464.7	27520.6	27587.6	25943.7	26129.2	17759.7	17582.5	15054	24153.8	18637.5	23891.4	21795.5	19222.4	21866.6	21694	21640.2	24720.4	23077.9	24691.6	23532.5
Bradi3g03520.1	5.01562e-05	0.000162646	0.713972	0.193859	0.0106676	0.00435623	0.00435623	1.22736	0.544331	1.11556	1.22736	0.595679	0.544331	MGSWSGHGGGAAAVVLVVAVLVTWAAAGVGAIGANWGTQASHPLPPDTVVKMLKGNGFQKVKLFDAEDGTMSALRKSGLEVMVGIPNDLLTTMATSMKAAEKWVDKNVSNYLNDGCNIRYVAVGNEPFLSTYNGSFLQSTFPALRNIQSALVKAGLSNQIKVTVPQNADVYQTSTSKPSDGDFRTDIHDRMLEIVKFLSDNGGAFTVNIYPFISLYIEPNFPKDYAFFEGAASPIVDGSATYTNMFDANHDTLIWALKKNGYGNLPIIIGEIGWPTDGDVNANAQFARLFNQGFMTHIATGRGTPMRPGPIDAYLFSLIDEDEKSIQPGNFERHWGIFTYDGLPKYELTLGTANSQLQRASGVKYLEKKWCVLKPSANLNDAKLPDTVSYACSMADCTS…	8292.8	14053.5	11297.3	14284.3	11982	14014.2	14448.1	13323.5	11680.8	13366.6	12102.8	17036.1	14455.4	15230.6	14706.3	7514.73	6036.29	7018.07	7980.55	7137.41	7130.07	6151.59	9034.68	3772.29	6522.16
Bradi3g03720.1	0.000201724	0.000520316	0.022657	0.00112358	0.000208801	0.000128458	0.000128458	0.522721	0.121284	0.522721	0.287785	0.161283	0.121284	MSPPENPNGGAAAAPSEPAQPPKPSSSSTSKGKGKKDEKKDDDLSEEDLALKEQLELYVVRAQDTDPGVQKLALESMRQEIRSATSSMTSVPKPLKFLRPHYGTLKSYFESMQEPELKKYMADILSVLALTMAVEGERESLKYRLLGSEGDIGSWGHEYVRNLAGEIAQEFQKRQGDEMPIDALMELVQQIASFHMKHNAEPEAVDLLMEVEDLDLLVEHVDSTNYKRACLYLTSSFKYLPGPDDALALDIAYTIYMKFRDLTNALRIALLLDNKSAQYVKQVYTATDDLSLKKQFSYIIARHGLAMEIDDEIAADENDKEILQEIVNNSKLSEGYLTLARDIEVMEAKSPEDIYKVHLIDGRGASSSLDSARQNLAATFVNAFVNAGFGQDKLMTAPS…	14481.2	11881.2	12845	4476.14	10920.9	5521.63	6226.95	4957.14	6128.59	5708.58	5226.69	3020.57	3880.12	444.107	3142.87	805.402	81.2963	2702.23	3456.51	1761.36	1186.92	2669.27	157.386	1284.55	1324.53
Bradi3g03730.1	1.48369e-06	1.02641e-05	0.0535068	0.00108942	2.9178e-08	3.59263e-05	2.9178e-08	0.835517	0.436972	0.835517	0.715274	0.436972	0.578363	MKKTTGENTNMSILERLATSDVPLVKEYGLHGVIGALLLAMVIPILLSSMLSKKVKKRAVQTDVGGEAGLAMRNSRFSSLIQVPWEGATTMAALFEMASKKYPQHRCLGSRNLISSEFIEAADGRKFEKLHLGEYEWNSYAEAFNRACNFASGLIKMGHQPDSRAAIFSDTRAEWIIASQGCFRQNLTVVTIYASLGEDALVHSLNETQVSTLICDSKQLKKLLSVSSKLQSVRHVIYIEDEPVDADTLNQLRHLTTLSFYAVEELGKTSHTDPRLPSSSDTAVIMYTSGSTGLPKGVMITHGNMVATTAAVRTIIPKLGTGDVYLAYLPLAHVFELAAETVMLASGVAIGYGSALTMTDTSNKIKKGTKGDVSVLKPTLMISVPAILDRIRDAVFKKV…	126377	138164	120566	113141	124562	83396.5	103099	103781	126019	104074	83713.9	79325	92518.4	100827	89096	45769	53099.1	64137.3	54715.3	54430.2	73449.3	70753.7	67149.8	76815.5	72042.1
Bradi3g04567.1	1.45429e-05	5.82621e-05	0.294351	0.229621	0.000122525	6.65757e-06	6.65757e-06	0.858201	0.422397	0.858201	0.845043	0.513417	0.422397	MAGPAVLLLQLWLAVAVKVLPLAAAAPGCRRRCGNVTVRYPFGIGDARCHRGEGRGFRLDCDDSRRPPRLTVAGYGHEVVAISLPAAEATVLLNASRACYDDDDNRTSSRRRYDEHPMALNGSAFLFSSMKSKFVAIGCPDLAYFVDGGGYYVTGCMSVCRPSERALPGSCRGGDGCCQSNIPLGLDSYRPYIRSFGGRRQQQQGTTTFMANSTRCAYAFMVDAWWFWYAGSRFNRTGDFAVPVVLDWAIRDAPSCAAAAAAHACLSAHSVCLDSANGPGYVCNCSSGFQGNPYVLGGCQDVDECARSDLYPCYGVCVNTPGSHVCTCPNGRSGNATVQDGCNPKDEFTLALKAVTGVSIGVFLVLLACFSAYLGLQKRRMLKAKQRFFEQNGGLLLQQ…	25862.4	19291.7	18594.9	17646.8	20348.9	20851.4	15436.4	15904.2	17661.8	17463.5	20161.9	14914.6	16782.3	16924.1	17195.7	10856.5	12143.4	7977.18	10812.9	10447.5	9171.09	7478.59	8814.53	8917.09	8595.33
Bradi3g05220.1	0.00013915	0.000378454	0.0728832	0.000236133	0.000324658	0.000300452	0.000236133	0.835059	0.633163	0.835059	0.633163	0.655343	0.64823	MATKRSVGTLGEADLKGKKVFVRADLNVPLDDAQKITDDTRIRASVPTIKFLLEKGAKVILASHLGRPKGVTPKFSLKPLVPRLSELLGIDVVMANDCIGEEVEKLAAALPDGGVLLLENVRFYKEEEKNDPEFAKKLASVADLYVNDAFGTAHRAHASTEGVTKFLRPSVAGFLMQKELDYLVGAVANPKKPFAAIVGGSKVSSKIGVIESLLAKVDILILGGGMIFTFYKAQGLAVGKSLVEEDKLELATSLIETAKAKGVKLLLPIDVVVADKFAADAESKVVPASAIPDGWMGLDVGPDAIKTFSEALDTCKTIIWNGPMGVFEFEKFAAGTDAIAKQLAELTAKGVTTIIGGGDSVAAVEKAGLADKMSHISTGGGASLELLEGKPLPGVLALD…	812375	1.03822e+06	1.18173e+06	990544	1.00572e+06	705580	830605	878745	944402	839833	654357	678543	558008	656224	636783	700795	658046	662967	614552	659090	546550	653377	695410	712410	651937
Bradi3g05370.1	0.00455638	0.00795157	0.62328	0.0181851	0.00240982	0.0336138	0.00240982	0.881363	0.554219	0.881363	0.662844	0.554219	0.694874	MSSPPPPPAVLVSNGAVSPHAPPSAATFLESTAGAYTTARASPTGGLLWWPRHLLRLADSARRLAESHPHLLGLPGPPPHALSASPIAPLVNRSVRVGVHEMRRLGDRGSEDLAITALVRADGSPEGLEVCVHLGLYVPPVFGVAGARLAVAGGGREAAAAKYAPWARMRKAMEKMRPPGTTELLLTNDGDRLLEGSVTNFFVVCRKEEHLSSEPLSVQAMSNEIEVQTAPLSDGVLPGIMRQIVIEVCHDLGIPVGEVSPSWSKRELWEEAFVTSSLRLIQHVETIQVPSVWEDIDSKTWNDVSWVVKQFQGAGCITTQIQRKISERAIMEEYNIANLCEL	12010.7	18070.8	16224.7	11846.6	14538.2	12914.5	10368.8	11881.9	16088.5	12813.4	7158.98	9907.83	9385.4	12094	9636.56	6694.27	7017.9	8672.34	9844.86	8057.34	11387.5	10081	10099.9	8840.47	10102.2
Bradi3g07130.1	0.000492526	0.00113382	0.700678	0.000197397	0.00795632	0.0109017	0.000197397	0.918254	0.568134	0.918254	0.568134	0.707473	0.720213	MAEAKLRSFVEVPRDSHFPIQNLPFGVFRRKSQPEDPPRPAVAIGGFALDLASVSAAGLFDGPVLSGSPCFRQETLNMFLGMGRPAWKEARATLQKILSADEPVLRDNEALRKNCLVPMSDAEMLLPITVGDYTDFFCSVHHARNCGFIFRGPQTPVNPNWFHLPVGYHGRASSVIISGTDIIRPRGQSHPTASSQPSFGPSKKLDFELEMAAIVGPGNELGKPISIDNAEDHIFGLVVMNDWSARDIQAWETIPLGPFLGKSFSTSVSPWIVTLDALKPFACEAPKQEPEPLPYLAEKNHINYDIPLEAWIKPKEQSDPSVVTKTNFKHMYWTVTQQLAHHTVNGCNLRPGDMFATGTLSGPEPDSLGCLLEITWNGQKEISVGNSIRKFLEDGDEVI…	112468	148451	117800	106579	121325	101682	105902	131055	106988	111407	77331.7	60222.2	59783.3	78377.2	68928.6	71080.9	99889.4	93021.5	79343.5	85833.8	70013	94268.8	90505.1	94731.3	87379.5
Bradi3g08160.1	0.00124667	0.00255777	0.984083	0.480146	0.154253	0.00116791	0.00116791	1.06829	0.199782	1.06829	0.762424	0.632185	0.199782	MTSSSKVANSSGGADDDLNQKLLSPSGLPVRDEIPGGYGVPFFSPLRDRLDYYYFQGAEEYFRSRIARHDGATVLRVNMPPGPFITGSGGSRVVALLDARSYSVLLDDARVDKTDTLDGTFVPPLALFGGHRPMAFLDAADPRHAALKRVGIRLAAARMHHVAPAFHASFGAIFDAVDAADVGSGRGVQFNKLNEHHMFDFTCAALFGGKPPSQAMGDGAVSKAIKWLALQLHPLASKIIRPWPLEDLLLHTFRLPPFLVRRDYAALTAYFSSAASAVLDDAENKSLQQQCGVTRDELLHNLIFLAIFNAYGGFKIFLPHIIKWLARAGPTLHAKLAAEVRAAAPHDREETITVQCVEKSMPLVKSVVWESLRMNPPVEFQYARAREDMVVESHDAAYK…	10080.6	41226.3	47061.2	42171.8	35135	36223	36941.8	37593	39379.8	37534.4	30481.8	28844.7	32145.1	15679.2	26787.7	26573.8	14173.6	23635	24464.7	22211.8	6538.27	6360.26	6979.57	8199.2	7019.33
Bradi3g08250.1	3.87863e-07	3.60847e-06	0.00315842	1.30349e-05	2.47391e-07	9.98414e-10	9.98414e-10	0.694078	0.256889	0.694078	0.431589	0.385589	0.256889	MALVLYAGGGNKNAFKALIAAEYSGVKIELVKDFQMGVSNKSAEFLKMNPIGKVPVLETPEGPVFESNAIARYVARVKADNPLYGSSLMEYAHIEQWIDFSATEVDVNIGKWLYPRLGFYHYVAVSEEASIAALKRALGALNTHLASSTYLVGHSVTLADIVMACNLYIGFARIMTKSFTAEFPHVERYFWTMVNQPNIRKVMGDVKQAESVPPVQKRTAAPKEQKPKEAKKEAKEAPKPKSVEKPDEEEEAPKPKPKNPLDLLPPSKMILDDWKKLYSNTKTNFREVAIKGFWDMYDPEGYSLWFCDYKYDEENTVSYVTLNKVGGFLQRMDLCRKYAFGKMLVIGSEAPFKVKGLWLFRGTEIPKFVLEEVYDMELYEWTKVDISDEAQKERASAMI…	27156.6	34586.1	30793.7	23789.8	29081.5	21665.9	18826.9	20172.7	20073.9	20184.9	10999.7	15397	12962.3	10846.1	12551.3	13121.1	10743.1	12614.2	8375.71	11213.5	12988.6	4101.53	6892.64	5900.18	7470.73
Bradi3g08660.1	0.0222507	0.0313649	0.0829727	0.0355753	0.0121724	0.0175675	0.0121724	0.568271	0.393429	0.568271	0.490285	0.393429	0.425653	MAKFGTYGYNPLLRLSLVLLLLASNSISDSTAQLPNAGDLAKLRTIAKDWGSPAALSPWAAGNWTGVTCNSNGQVTALSLTKLHVGNPIPAASICSLEQLSSLDASYNNLTGEFPTALYGCSALQFLDLSNNQLAGSLPRDINKLSSEMLHLNLSANGFVGQVPSAIAGFPKLKSLLLDTNGFNGSYPAEAIGQLPELETLTLANNPFAPGPIPDAFGKLTKLTLLWLSGMNLTGRIPSSLSALTELSILDMSVNKLQGEIPEWIWKLQKLQYIYLFANKFTGRIGPFDAAASMLQLDLSSNRLTGPIHETIGSMKNLSLLFLYYNYIAGPIPASLGLLPNLADIRLFDNKLSGPLPPELGKHSPLGNFEVSNNLLSGELPETLCANKQLFDLVVFGNG…	11587.7	4909.36	4998.25	6113.33	6902.15	4727.34	3810.1	3657.77	3493.95	3922.29	3161.02	2391.45	4542.95	3440.67	3384.02	4974.41	2761.37	2571.05	555.196	2715.51	2844.35	2767.62	2435.6	3704.11	2937.92
Bradi3g08900.1	2.93088e-07	2.95556e-06	0.596479	7.80088e-06	4.55622e-07	2.5214e-07	2.5214e-07	0.891051	0.192717	0.891051	0.370769	0.265894	0.192717	MAPTSKMALGIKRASRSHSYHRRGLWAIKAKHGGAFPKAEKPAAVAEPKFYPADDVKPRTVSTRKPKPTKLRSTITPGTVLILLAGRYMGKRVVFLKQLKSGLLLITGPFKINGVPIRRVNQTYVIATSTKVDISKVNVGKFDDKYFARDKKARAKKTEGELFETEKEATKNLPDFKKDDQKTIDAELIKAIEAVPDLKNYLGARFSLRDGDKPHEMTF	7836.36	9047.98	11224.5	6576.08	8671.24	6278.93	7408.63	8869.5	8349.02	7726.52	3434.27	3974.19	2632.73	2818.94	3215.03	2216.34	1998.45	2699.42	2308.31	2305.63	2642.95	963.257	2129.74	948.425	1671.09
Bradi3g09850.1	1.26085e-06	9.24398e-06	0.00229923	3.19385e-05	1.79955e-08	1.99455e-06	1.79955e-08	0.686074	0.323244	0.686074	0.539746	0.323244	0.41682	MAEPAEKTTAAPPADGVSEEAPPATATARGFRFLGEDKSVHKALGGGKTADVLMWKDKKMSAAVIGGATVIWVLFEVVEYNFLPLVSHVLIGTLAIVFLWSKATIFIKKSPPDIPEVQISEDLAVNIVQALRTDINQALGLLREIALGHDLMKFLGLMVALWVLSEIGSLCDFLTLVYVAALMLHTVPILYHKYQDKVDDFAGKAHVELRKLYEAFNAKVLSKIPRGPARDKKHE	48373.2	55452.7	46030.8	35136.1	46248.2	33793.4	30763.5	27407.8	34954.1	31729.7	22048.6	26064.7	27252.1	24483.8	24962.3	20217.9	12247.9	14176.6	13155.3	14949.4	22573.3	18618.5	14288	21628.8	19277.2
Bradi3g10120.1	0.000228787	0.000580139	0.0505503	0.00546531	0.000510946	6.0408e-05	6.0408e-05	0.774822	0.501658	0.774822	0.682105	0.57519	0.501658	MENFKKSSGDLMSSGKLVAESAMSAFQEKSVENVDKKKVAGASAEILDSASAYAKLEDKPVGQYMEKAEVYLKQYSAGGTEEKPTDAAAPPAAAVDAPPKPEAEEEAPKEPAPKPEAEESGGGLFKMAQGFMK	213779	240299	217465	155881	206856	160572	149882	171296	159356	160277	123578	125679	134996	180137	141097	129685	131541	121801	92899.1	118981	91486.2	77245.6	125403	120949	103771
Bradi3g10500.1	0.0278316	0.038272	0.428106	0.971265	0.0301581	0.528886	0.0301581	1.06537	0.578024	0.795188	1.06537	0.578024	0.818616	MDYWKSKVLPKMKTVFAKNAGKKAAATAELVKSFDESKEGINGEFEKKKVDLQPKVVEIYEGAAAAVKVLIKQRKVSGIKKNSAAVTKFMEDLANIDFPGAKQVSEGIAKVGPALLSGPLFATFDKVSTLLPATDEAPKEAPADAEEKKEEAASEEKTEEAQPPAAAVEETAVAAADESAPAAAEALPVAEESTAPVSEAPEAAAPLAEAEPAKAQEETPKA	252800	475793	548362	436027	428245	239174	363961	336830	422177	340536	395211	535242	492241	402258	456238	173165	253157	265953	297869	247536	226233	363238	398284	414519	350569
Bradi3g11500.1	4.87574e-05	0.000158491	0.000683775	8.26254e-06	7.55257e-05	0.00201352	8.26254e-06	0.525457	0.233275	0.466888	0.233275	0.346858	0.525457	METCSLARMMMRLQSLAMHPRDLCSLIFRLLPELLGLPPFLLKKVCKDEHVHPRLMRTTVGMLPELPKDILIDIFVLLDTPDLVRAGSVCSSWYSASTSLCNLGLCRRSQTPCLLYTSESAGESAAGLYSLAEKRSYKLTLPDPPIRSRYVIGSNHGWIVSADNRSELHLLNPITGDQIALPSVTTIEQVKPVFDDYGALHKYELSRYTALKVYEAPRVFDLGELREYVYLKAFLSSDPSTGNYYVVLIHYPYMQLSFARAGDDKWTWLPPHTYCSDCIIEEDLFYVASQDGAIHAFDISGPAVTQRVILDEIKDYISDKIYIAQAPSGDLLQIWKYTEDPDYNDDVSELQIDAEFYARCSTTCKVHKVDLAAKKLVEKNSLGENVLFLGHNPSLCLRA…	47193.5	57481.5	64606.1	48026.3	54326.9	18762.7	20305.6	27899.5	34490.5	25364.6	8758.74	16370.5	11928.6	13634.6	12673.1	24645.4	13975.3	17314.4	19439.7	18843.7	13042	22057.1	45632	33454.6	28546.4
Bradi3g12520.1	0.0207581	0.0295698	0.0286901	0.0187588	0.0219837	0.0179848	0.0179848	0.0753671	0.00120714	0.0753671	0.00866313	0.0355123	0.00120714	MDFPKEIFLKDYKKPDYLFDTVDLEFQLGSDETIVTSKIAVSPGNEGTSSPLVLHGRDLKLLSIKVNGTELKSDKYTVDPRHLTILTPPAGVFNLEIVTEIYPQLNTSLEGLYRTTGNFCTQCEAEGFRKITYFQDRPDVMAKYTCRIEGDKTLYPVLLSNGNLIKQGDLEGGKHYALWEDPFKKPCYLFALVAGQYECREGSFVTCSGRKVTLRIWTPAEDLPKTSHAMYSLKEAMKWDEEVFGLEYDLDLFNIVVTPDFNMGAMENKSLNVFQSRLVLASPETATDGDYAAILGVIGHEYFHNWTGNRVTCRDWFQLTLKEGLTVFRDQEFSSDLGCRTVKRIADVSKLRSYQFPQDAGPMAHPIRPHSYIKMDNFYTVTVYEKGAEVVRMYKTLFG…	10001.1	5076.65	29134.5	4103.16	12078.9	2085.39	0	0	1556.01	910.349	0	418.563	0	0	104.641	195.304	703.196	0	817.291	428.948	0	58.3233	0	0	14.5808
Bradi3g13000.1	0.0119716	0.0183519	0.97247	0.339876	0.00642165	0.0764576	0.00642165	0.905113	0.21896	0.905113	0.66477	0.21896	0.481043	MSPSGEVVASVSSALAILLVLLACVELGDAAAAVGVYRLIQYDLAGAPLGSRAATLNHHAAALPLPAGADLSRSALVAPLLDLPLSFLRDYLAEKKHLGGLLILLPTNLSAKNGEENNDDKGQPKRVLAELEKLLVHEEVPYPVYFAFHDDNFDNLLADIRKIASSGQPASASTGGYKLVVPSAEPRKVSSPTISNIQGWLPGLKGEGDAEQLPTIAIVANYDTFGAAPALSVGSDSNGSGAVALLEISRLFSRLYSNPKTRGKFNLLFGLTSGGPYNYNGTSKWLRSFDQRVRESIDYAICLNSVGSWSNDIWMHVSKPPENPYIKQIFEGFSDVSKEMGISVGIKQKKINVSNSRVAWEHEQFSRFRVTALTLSELSTPPEFLESTGGIYDTRESAD…	32729.1	43277.2	25798.6	42123.8	35982.1	12607	26840.6	46956.3	43867.8	32567.9	20546.5	19215	19229	36689	23919.9	8298.89	2050.08	10464	10701.7	7878.66	13862	19090.9	32583.8	3699.09	17309
Bradi3g13600.1	1.01484e-05	4.3461e-05	0.00566996	1.84878e-05	6.12579e-06	1.14618e-05	6.12579e-06	0.720295	0.456731	0.720295	0.519897	0.456731	0.504068	MAPLGDAPAAAAAVAPAGGLVVSFGEMLIDFVPDVAGVSLAESGGFVKAPGGAPANVACAVSKLGGSSAFVGKFGDDEFGHMLVDILKQNGVNSEGCLYDQHARTALAFVTLKSNGEREFMFYRNPSADMLLTADELNLDLIRRARIFHYGSISLITEPCRSAHVAAMRAAKAAGILCSYDPNVRLPLWPSPEAAREGIKSIWKEADFIKVSDDEVAFLTQGDANDEKNVLSLWFEGLKLLIVTDGEKGCRYFTKDFKGSVPGYSVKTVDTTGAGDAFVGSLLLNVAKDDSIFHNEAKLREVLQFSNACGAICTTQKGAIPALPTTAAALELISKGSN	394778	571238	654719	516331	534266	334966	358657	447108	398586	384829	273667	284060	265504	287824	277764	230714	268648	235332	241369	244016	238880	278682	297687	261977	269307
Bradi3g13700.1	6.71949e-06	3.15206e-05	0.0627942	6.16776e-05	3.7019e-05	7.76195e-06	7.76195e-06	0.658455	0.0693214	0.658455	0.169006	0.0693214	0.0787831	MELIGMHKPLLLLIIMAGLASGSPPPEPVACTGRGNTDCTVTNTYGSFPDRTICRAANATFPTTEAELVAAVASAAASKRKVKVATKHSHSFPKLACPGGRSGTIISTERLNRTVSVDAAKGLMTVESGMVLRDLIKAAAAAGLALPHSPYWYGITIGGLLATGAHGSGLWGKGSAVHEYVVGMRIVTPAPASEGWAVVRELGVDHPDLDAVKVSLGVLGVVSQVTLALQPMFKRSVTFEKRDDTDFAAQSAVWGGLHEFGDMAWLPRQGKVIYRKDDRIPVSTPGNGLNDYIGFRANPTLALITARATEEHLEKDGDDIARCLSARVPGALFELQAYGFTNDGSFFTGYPVVGFQNRIQASGTCIGSREDGLLSSCTWDPRIRSPFFYQSGFSVALSK…	15499.3	22808.3	17738.9	11924.3	16992.7	7505.3	6169.8	13833	17247.6	11188.9	2969.62	3335.41	3440.8	1741.68	2871.88	632.517	892.324	1656.4	1530.6	1177.96	794.994	1019.14	2284.33	1256.49	1338.74
Bradi3g13750.1	1.64469e-07	1.89631e-06	0.191952	0.000488097	9.83072e-08	6.31822e-07	9.83072e-08	0.839511	0.212397	0.839511	0.595025	0.212397	0.277327	MSSSEVACTLAALILHDDNIPITAEKIATVVKASGIKVEAYWPALFAKLLEKRSVDDLILSVGSGGGGAPAAAAAAPAAGGAAAAEEKKEEKKEEAKEESDDDMGFSLFD	12275	12550.8	16405.9	12092.1	13331	9479.63	10875.6	11920.2	12490.5	11191.5	8147.62	9524.41	6666.13	7390.83	7932.25	4646.45	924.153	2784.46	2970.76	2831.46	4075.61	2328.12	2944	5440.38	3697.03
Bradi3g13800.1	9.11861e-08	1.21355e-06	0.00912164	9.27747e-06	2.05276e-07	5.92563e-09	5.92563e-09	0.780833	0.373971	0.780833	0.520074	0.394397	0.373971	MGRMHSRGKGISSSALPYKRTPPVWVKTAASDVDELITKAAKKGQMPSQIGVLLRDQHGIPLVKSVTGSKILRILKAHGLAPEIPEDLYFLIKKAVAIRKHLERNRKDKDSKFRLILVESRIHRLARYYKRTKKLPPTWKYESTTASTLVA	100657	131226	133894	106459	118059	81376.5	90668.4	97329.3	99363.4	92184.4	63574.1	60521.6	54305.2	67197.2	61399.5	53395.8	55863.6	33765.5	43223.6	46562.1	51012.5	40104.9	38565.1	46920.4	44150.7
Bradi3g13810.1	1.41123e-05	5.69986e-05	0.295788	3.83471e-05	5.71424e-05	6.9757e-05	3.83471e-05	0.817937	0.334736	0.817937	0.334736	0.341965	0.341819	MGRMHSRGKGISSSALPYKRSPPSWVKIATTEVDEMITKAAKKGQMPSQIGVLLRDQHGIPLVKSVTGSKILRILKAHGLAPEIPEDLYFLIKKAVAIRKHLERNRKDKDSKFRLILVESRIHRLARYYKRTKKLPPTWKYESTTASTLVA	17827.2	20214.3	16608.8	14749.3	17349.9	12001	14188.4	17564.1	13010.9	14191.1	8582.52	6002.08	2310.37	6335.59	5807.64	8983.12	9257.18	3104.26	2387.64	5933.05	7905.66	5039.07	6550.09	4227.26	5930.52
Bradi3g13820.1	1.0566e-05	4.48226e-05	0.350899	0.00290993	9.49672e-06	5.06208e-05	9.49672e-06	0.87196	0.426876	0.87196	0.666371	0.426876	0.481916	MGGKELSEDQVSSMREAFSLFDTDGDGRIAPTELGVLMRSLGGNPTQAQLRDIASQEKLTAPFDFPRFLELMRAHLRPEPFDRPLRDAFRVLDKDATGTVSVADLRHVLTSIGEKLEPHEFDEWIREVDVASDGTIRYDDFIRRIVAK	40274.5	41845.6	48657.6	31580.6	40589.6	29290.6	36440.5	38663.5	37175.4	35392.5	22160.7	25999.8	24710.6	35319.9	27047.7	15758.3	15501.8	20856.6	17190.1	17326.7	19641.8	18742	20666.9	19192.4	19560.8
Bradi3g14040.1	0.00262815	0.00492414	0.372679	0.00386259	0.0364855	0.00155318	0.00155318	0.812052	0.461258	0.812052	0.51018	0.649796	0.461258	MGKIKIGINGFGRIGRLVARVALQSDDVELVAVNDPFITTEYMTYMFKYDTVHGNWKHSDIKLKDDKTLLFGEKPVTVFGVRNPEEIPWAEAGADYVVESTGVFTDKDKAAAHLKGGAKKVVISAPSKDAPMFVVGVNEDKYTSDVNIVSNASCTTNCLAPLAKIINDNFGIVEGLMTTVHAITATQKTVDGPSSKDWRGGRAASFNIIPSSTGAAKAVGKVLPELNGKLTGMSFRVPTVDVSVVDLTVRTEKAASYEDIKKAIKVASEGNLKGIMGYVEEDLVSTDFVGDSRSSIFDAKAGIALNDHFVKLVSWYDNEWGYSNRVVDLIRHMAKTQ	17189.1	28662.1	31199.2	27774.6	26206.2	16132	22891.9	18707.6	27391.8	21280.8	10144.8	15995.2	10582.5	16757.1	13369.9	18927.5	14346.4	16066.3	18774.7	17028.7	6351.11	10417.2	15856.4	15726.6	12087.8
Bradi3g14120.3	0.000120295	0.000332538	0.708427	0.00164947	0.000860061	0.000268322	0.000268322	0.920204	0.559479	0.920204	0.649124	0.624054	0.559479	MGKIKIGINGFGRIGRLVARVALQSDDIELVAVNDPFITTEYMTYMFKYDTVHGHWKHSDIKLKNDKTLLFGEKSVTVFGVRNPEEIPWAEAGADYVVESTGVFTDKDKAAAHLKGGAKKVVISAPSKDAPMFVVGVNEDKYTSDVNIVSNASCTTNCLAPLAKIINDNFGIVEGLMTTVHAITATQKTVDGPSSKDWRGGRAASFNIIPSSTGAAKAVGKVLPELNGKLTGMSFRVPTVDVSVVDLTVRTEKAASYEDIKKAIKAASEGNLKGIMGYVEEDLVSTDFVGDSRSSIFDAKAGIALNDHFVKLVSWYDNEWGYSNRVVDLIRHMAKTQ	316435	396598	447019	457548	404400	355692	356385	392404	384041	372131	319397	269831	258714	202081	262506	295426	195767	243379	274897	252367	234739	276941	198119	195216	226254
Bradi3g14140.1	0.00451941	0.00790751	0.429626	0.00632185	0.869252	0.654525	0.00632185	1.14311	0.27193	0.720706	0.27193	1.14311	0.789168	MGTQAEENHSSPAKDVRTEQEKKIDDWLPITSSRNAKWWYSAFHNVTAMVGAGVLSLPYAMSELGWGPGIAVLVISWVITLYTLWQMVEMHEMVPGKRFDRYHELGQHAFGEKLGLWIVVPQQLIVEVGVNIVYMVTGGKSLKKFHDVICDGKCKDIKLTYFIMIFASVHFVLSQLPNLNSISGVSLAAAVMSLSYSTIAWGASVDKGQVANVDYSIRATTTPGKVFGFFGALGDVAFAYAGHNVVLEIQATIPSTPEKPSKKPMWKGVVVAYIVVAICYFPVALIGYWAFGNGVDDNILITLSKPKWLIALANMMVVIHVIGSYQIYAMPVFDMIETVLVKKLHFPPGLTLRLIARTLYVALTMFIAITFPFFGGLLGFFGGFAFAPTTYFLPCIMWL…	58081	24542.7	27669	36427.9	36680.2	30248.4	28174.6	27255.7	20063.8	26435.6	10853.7	11975.3	9286.85	7781.82	9974.42	62378.5	39840.5	36474.4	29024.8	41929.5	31430.7	19621.4	30148.3	34586.8	28946.8
Bradi3g14340.1	4.23823e-06	2.25983e-05	0.199887	2.15587e-06	3.77629e-06	0.000531026	2.15587e-06	0.888649	0.573345	0.888649	0.587979	0.573345	0.708082	MAIKRTKAEKKIAYDKKLCQLLEEYSKVLIAVADNVGSKQLQEIRKGLRGDSVVLMGKNTLIRRCIKVHSEKTGNKDYLELSNLLIGNVGLIFTKGDLKEVREEVAKYKVGAPARVGLVAPVDVVVPPGNTGLDPSQTSFFQVLNIPTKINKGTVEIITPVELIKKGDKVGSSESALLAKLGIRPFSYGLVINNVYDSGSVFSPEVLDLTEEDLMDKFASGVSMVASLSLAISYPTIAAAPHMFINAYKNVLAIAVETDYSYPHGDKIKEYLKDPSKFAVAAPAAAAASGGAAAAAPKEEEKKDEPEEESDGEMGFSLFDD	734413	876551	884676	715682	802830	606320	703278	738311	805827	713434	441447	497582	438401	510757	472047	428477	493143	422789	496785	460298	494774	584595	621228	573281	568470
Bradi3g14960.1	0.00155421	0.00312463	0.114207	0.000385083	0.0981047	0.016107	0.000385083	0.828217	0.595591	0.828217	0.595591	0.821784	0.75108	MATGSEAAKSAEAVLEWPKQDKKRMLHAVYRVGDLESTIKCYTECFGMKLLRKRDVPEEKYTNAFLGFGPEDTNFALELTYNYGVDKYDIGEGFGHFAIANEDVYKLAETIKSKSCCTITREPGPVKGGSTVIAFAKDPDGYMFELIQRGPTPEPLCQVMLRVGDLDRSIKFYEKALGMKLLRKKDVPDYKYTIAMLGYDEEDKTTVIELTYNYGVTEYNKGNAYAQVAIGTDDVYKSAEAVELVTKELGGKILRQPGPLPGLNTKITSFLDPDGWKVVLVDHADFLKELH	215820	289508	267621	189286	240559	220687	196020	184703	195530	199235	139654	136611	139625	157209	143275	218269	198392	206316	167773	197688	165274	162584	196942	197916	180679
Bradi3g16150.1	6.14439e-05	0.000192762	0.141026	0.000852075	0.000293847	2.56515e-05	2.56515e-05	0.790035	0.390165	0.790035	0.534585	0.446589	0.390165	MATQISKKKKFVSDGVFYAELNEMLTRELAEDGYSGVEVRVTPMRTEIIIRATRTQNVLGEKGRRIRELTSVVQKRFNFPENGVELYAEKVVNRGLCAIAQAESLRYKLLGGLAVRRACYGVLRFVMESGAKGCEVIVSGKLRAQRAKSMKFKDGYMISSGQPVNEYIDAAVRHVLLRQGVLGIKVKIMLDWDPKGKLGPTTPLPDLVTIHPPKEEDELRPPTLVEV	110619	216386	210436	184271	180428	119524	144515	165215	140924	142544	107003	97324.8	93642.8	87844.9	96453.9	57219	91305.1	87194.5	86589.6	80577	69995.5	79950.1	68104	63536.8	70396.6
Bradi3g16180.2	0.00122117	0.00251121	0.52712	0.0126876	0.00152439	0.00180145	0.00152439	0.843734	0.459258	0.843734	0.584742	0.459258	0.463602	MGLKEEFEEQAEKAKTLPETTSNENKLILYGLYKQATVGVVNTPRPGLFNLKDKAKWDAWKAVEGKSTEEAMSDYITKVKQLQEEASAA	54533.1	90702.6	90604.5	47779.9	70905	56674	60321.8	66634.1	55670	59825	46656.3	38942.7	32227.7	48017.9	41461.1	42431.1	31280.5	28939.6	27603.7	32563.7	24065.7	25653.6	38760.4	43007.3	32871.7
Bradi3g16530.1	4.45362e-05	0.000147615	0.00214213	1.63754e-05	0.000193234	0.000115763	1.63754e-05	0.697745	0.520308	0.697745	0.520308	0.608257	0.589625	MGSTAADMAATADEEACMFALQLASSSILPMTLKNAIELGLLDTLVQASGKSLTPAEVAAKLPSSSNPAAPDMVDRMLRLLASYGVVSCAVEEGENGKLSRRYAAAPVCKWLTPNEDGVSMAALALMNQDKVLMESWYYLKDAVLDGGIPFNKAYGMSAFEYHGTDPRFNRVFNEGMKNHSIIITKKLLDLYPGFEGLGTLVDVGGGVGATVGAIVARHPAIKGINFDLPHVISEGIPFPGVTHVGGDMFQKVPSGDAILMKWILHDWSDAHCATLLKNCYDALPAHGKVVIVECILPVNPEATPKAQGVFHVDMIMLAHNPGGKERYEREFEELARGAGFTGVKATYIYANAWAIEFTK	439462	474792	643352	588999	536651	316208	377344	403701	400529	374446	274175	309398	241116	292206	279224	312252	376484	329231	287720	326422	294872	350060	329355	291404	316423
Bradi3g16600.1	1.06228e-06	8.14216e-06	0.0329694	1.0664e-05	1.42241e-07	2.72389e-06	1.42241e-07	0.71052	0.147708	0.71052	0.307103	0.147708	0.240629	MVQRLTYRKRHSYATKSNQTRVVKTPGGKLVYQYTKKRASGPKCPVTGKKIQGIPHLRPTEYKRSRLSRNRRTVNRPYGGVLSGPAVRERIIRAFLVEEQKIVKKVLKIQKTKDKTTKA	68333.1	88505.3	105164	72107	83527.4	62786	76954.8	37493.3	60157.5	59347.9	31144.6	26465.4	16563.9	28432.4	25651.5	15697.5	18449.2	6373.92	8830.24	12337.7	27534.2	10683.2	22081.6	20097.4	20099.1
Bradi3g16670.1	0.000925983	0.00196547	0.153858	0.974067	0.0332379	0.134444	0.0332379	1.32793	0.54339	1.32793	1.06985	0.54339	0.659878	MVGLIPQTNAAAEVLGDAWDYRGRPAARVSTGRWGAAAMILVAELNERLTTLGIAVNLVTYLTATMHVGNAEAANVVTNFMGTSFMLCLLGGFVADSFLGRFLTIAIFTAIQASGVTILTISTAAPGLRPASCTPSSSSPVCARASGAQLGILYAALYLTALGTGGLKSSVSGFGSDQFDESNDTEKSQMMRFFNWFFFFISLGSLLAVTVLVYVQDNLGRPWGYGACAAAIAVGLVVFLAGTRRYRFKKLAGSPLTQIAAVVVAAWRKRKLPLPAEPDMLYDIDVGKAAAADEAGNGKKSKLKERIPHTKQFRFLDHAAINNDPAGEQSKWELATLTDVEEVKTVARMLPIWATTIMFWTVYAQMTTFSVSQATTMDRHIGSSFQIPAGSLTVFFVGS…	33176.3	25566	37863.5	49133.6	36434.9	38166.6	52694.2	58573.1	44098	48383	46355	47199.8	30773	31592.1	38980	18760.9	15413.5	23362.3	21656.7	19798.4	31151.7	26210.7	24179.7	14628.1	24042.6
Bradi3g16680.1	0.000180978	0.000476231	0.488607	0.985459	0.00108405	0.160768	0.00108405	1.13421	0.537031	1.13421	1.03804	0.537031	0.792602	MSAGAGTGTFLEIQPSELAFPFELLKQSSCSMQLTNKTDHYVAFKVKTTNPKQYCVRPNIGVVLPGSTCDVTVTMQAPAMAPPDLQCKDKFLVQSVAAENGAATQDITAAMFNKEPGKVIDECKLRVLYVLTTAPGSNPEESELGSSSRSFTQENGTPNSTLLPSRSFGETGKEKSSEATTMISKLTEEKMSAIQQNQKLRQELDLLRKESSKSNGGFSLTFMIVVGLLGIVVGFILKKT	39128.4	34843.7	38938.5	35978.4	37222.3	36502	42789.2	44628.9	44952	42218	31828.4	39579.2	41381.1	41764.2	38638.2	15410.6	12539.2	27217.3	24790.8	19989.5	28344.4	23929.5	39183.7	26552.3	29502.5
Bradi3g17680.1	5.52123e-05	0.000176496	0.00148543	6.79014e-05	2.25158e-05	0.000102359	2.25158e-05	0.646399	0.488376	0.646399	0.540398	0.488376	0.524393	MPPKSSKKDAGPVERPILGRFSSHLKIGIVGLPNVGKSTFFNIVTKLSIPAENFPFCTIEPNEARVYVPDERFDWLCQLYKPKSEVSAYLEINDIAGLVRGASAGEGLGNAFLSHIRAVDGIFHVLRAFEDKEITHIDDTIDPVRDLETISQELRLKDIEFVQARIDDLDKQMKRSNDKQLKIEHELCQRVMAHLREGKDVRLGEWKSAEIEILNTFQLLTAKPVVYLVNMSEKDYQRKKNKFLPKIHAWVQEHGGETIIPFSCAFEQKLVDMPADEAAKYCAENQITSLIPKIIKTGFAAIHLIYFFTAGPDEVKCWQIRRQTKAPQAAGTIHTDFERGFICAEVMKFEDLKELGSESAVKAAGKYRQEGKTYVVQDGDIIFFKFNVSGGGKK	61369.5	85533.9	90637.2	68724.5	76566.3	43064.7	56415.8	43963.9	54525.2	49492.4	40034.4	48273	35365.8	41831.9	41376.3	38158.5	43480.8	30295.1	37638.3	37393.2	35426.3	32117.9	50528.4	42530.8	40150.9
Bradi3g17960.1	0.000115165	0.000321662	0.980038	0.0012393	0.00701985	0.00143735	0.0012393	1.03097	0.660773	1.03097	0.66094	0.72184	0.660773	MDPKLTEVTQLFARFKAAYSRNDLDVCANLLSQLKVLLTKFPSLPPSFQQTPNAVEELKLARDIYEHAVVLSVKMEDQDAFERDFCQLKPYYMDTCGIIPPSPEEYPILGLNLLRLLVQNRIAEFHTELELLPAKALDNLCIKHAVELEQSFMEGAYNRVLSARQAVPHETYVYFMDLLAKTVRDEIAGCSEKGYDYLSISDAKEMFMFSSDQELQQYITEEHPEWDVKNGSVFFQKAKESQPCKEIPAAPVINQTLGYARELERIV	9881.16	10586	13102.5	10464.2	11008.4	10056.6	11629	11178.8	12532.8	11349.3	6494.76	7510.69	7317.45	7780.76	7275.91	7497.82	8888.49	8066.06	7332.97	7946.33	5835.65	8688.94	5835.4	8736.34	7274.08
Bradi3g18820.1	0.00107734	0.00224279	0.0125585	0.0307034	0.00121013	0.000366679	0.000366679	0.748284	0.56335	0.710951	0.748284	0.609087	0.56335	MVEMAVTVAAGTHRPCSGVSPAASGNRRLAGWRPLAPAAPAKLRLSSPALRVPRAASPAAVEDGSSSNTDTVPTPKVIIDQDSDPDATIVEVTLGDRLGDLLDTMSALRNLGLNVVKASVCLDSSGKHNKFAITKSSTGRKIDDPELLEAVRLTIINNMLEYHPETSSQLAMGATFGIEPPTEVVDVDIATHIDIYDDGPERSLLVVESADRPGLLVDLVKIIADINITVQSGEFDTEGLLAKAKFHVSYRGKPLIKALQQVLANSLRYFLRRPTTEDASF	35087.6	35727.1	33975.9	32258.7	34262.3	18960.2	23062	22222	33191.1	24358.8	24898	26295.9	19774.9	31583	25638	16471.6	23046.4	23510.6	20446.3	20868.7	17765.3	17621.8	17865.9	23953.7	19301.7
Bradi3g20460.1	1.3529e-06	9.6203e-06	0.123891	8.79723e-05	3.84548e-06	2.1548e-06	2.1548e-06	0.820896	0.385345	0.820896	0.396115	0.385345	0.406656	MMAAQVQAAAVAAAAPAMEGGASPVAGAAAAAGAVAPAFPATSLYVGDLDVSVQDAQLFDVFSQVGSVVSVRVCRDVNTRMSLGYAYVNFSSPADAARAMEMLNFTPVNGKPIRIMYSNRDPSSRKSGAANIFIKNLDKSIDNKALFDTFSAFGTILSCKVATEISGESKGYGFVQYEQDESAQNAINELNGMLLNDKKVYVGPFVRKQERENVFGSPKFNNVYVKNLSESTTEDNLKEMFGKFGPITSVIVVRADDGKSRCFGFVNFENPDDAARAVEDLNGKKLDDKELYVGRAQKKSEREMQLKEKFEKSNKETADKNQGTNLYLKNLDGSVDDDEKLKELFAEFGTITSCKVMRDSNGVNKGSGFVAFKSSEDASRALVAMNGKMVGSKPLYVAL…	69944.3	114571	89560.9	105190	94816.3	67884.2	71167.5	88896.8	83388.7	77834.3	37883.2	33433.9	37148.3	41767.3	37558.2	31354.3	41289.9	33786.3	39717.6	36537	32654.1	45429.6	45328	30818.9	38557.6
Bradi3g22550.2	0.000162003	0.000433615	0.00168065	0.000560709	0.000102384	0.000265662	0.000102384	0.596154	0.453263	0.596154	0.550337	0.453263	0.490914	MAATIQSVKARQIFDSRGNPTVEVDVCCSDGTFARAAVPSGASTGVYEALELRDGGSDYLGKGVSKAVNNVNSIIAPALIGKDPTTQAELDNFMVQQLDGTKNEWGWCKQKLGANAILAVSLAVCKAGASVKKIPLYQHIANLAGNKHLVLPVPAFNVINGGSHAGNKLAMQEFMILPTGATSFKEAMKMGVEVYHNLKSVIKKKYGQDATNVGDEGGFAPNIQENKEGLELLKTAIEKAGYTGKVVIGMDVAASEFYNDKDKTYDLNFKEENNDGSQKISGDSLKNVYKSFVSEYPIVSIEDPFDQDDWVHYAKMTEEIGEPVQIVGDDLLVTNPTRVAKAIQEKSCNALLLKVNQIGSVTESIEAVKMSKHAGWGVMTSHRSGETEDTFIADLAVGL…	359191	670793	544448	459411	508461	284895	316158	262345	349086	303121	264249	317888	227424	309738	279825	220283	251967	217824	231793	230467	220286	244288	275183	258685	249611
Bradi3g26267.1	1.64972e-08	3.46637e-07	0.000117136	0.00352693	1.4175e-10	3.70721e-09	1.4175e-10	0.787009	0.356478	0.671727	0.787009	0.356478	0.441769	MQQQAAASGAHTSGNNFQKKKKKQRKRGHGPGLAGLGDGPRRRELGSAARWWRALLLQRGRRVELGRRPAGEEAWRRSRSGGGRSLGERGQEQGEAEQASGARQRSGAGSEVRHAASRWRWSSRRRRGRGAGVGGAEEEGRRARGQVRGVLAREVGRRRRGDGGGVDGAHGDDGELHGGASSGSRGAGRRGWAGRARATAWSEEGAGERRLSGAQGQGSREEGAGGGRRKGRRRLAAAAARRKKGRKKKKKKKKRERGLKS	26113.3	31048.5	33299.4	25238.7	28925	19509.1	19766.2	17576.9	20866.5	19429.7	21747.1	23852	21839.5	23618.3	22764.2	10725.3	12813.6	9095.38	8610.15	10311.1	12508.7	12297.2	14119.4	12187.3	12778.1
Bradi3g28300.1	0.00192973	0.00375101	0.0727978	0.0173896	0.0268449	0.000333113	0.000333113	0.75674	0.491166	0.75674	0.68604	0.705801	0.491166	MSKRGRGGSAGNKFRMSLGLPVAATVNCADNTGAKNLYIISVKGIKGRLNRLPSACVGDMVMATVKKGKPDLRKKVMPAVIVRQRKPWRRKDGVFMYFEDNAGVIVNPKGEMKGSAITGPIGKECADLWPRIASAANAIV	51358	89008.8	80648.8	68384.1	72349.9	54737.6	57180.9	48901.1	58180.7	54750.1	40768.7	55787.2	45341.9	56642.1	49635	42263.2	51469.5	45950.3	64575.7	51064.7	27438.5	35940.6	43487.4	35276.7	35535.8
Bradi3g28820.1	4.64339e-05	0.000152779	0.0245294	8.79591e-05	0.000159043	0.000356222	8.79591e-05	0.830746	0.624513	0.830746	0.624513	0.690584	0.710722	MAKDPMRVLVTGAAGQIGYALVPMIARGIMLGADQPVILHMLDIPQAAEALNGVKMELVDAAFPLLKGIVATTDVVEACTGVNVAVMVGGFPRKEGMERKDVMSKNVSIYKSQASALEAHAAPNCKVLVVANPANTNALILKEFAPSIPEKNISCLTRLDHNRALGQISERLNVQVTDVKNVIIWGNHSSSQYPDVNHATVNTPSGEKPVRELVKDDEWLNAGFIATVQQRGAAIIKARKFSSALSAASSACDHIRDWVLGTPEGTYVSMGVYSDGSYGVPAGLIYSFPVTCSSGEWTIVQGLPIDEFSRKKMDATAQELSEEKLLAYSCLE	1.198e+06	1.56437e+06	1.6326e+06	1.38015e+06	1.44378e+06	1.0922e+06	1.19301e+06	1.24559e+06	1.26686e+06	1.19942e+06	882110	937471	808172	978885	901659	955711	1.08443e+06	979621	968450	997052	900710	1.03029e+06	1.03969e+06	1.13381e+06	1.02613e+06
Bradi3g29060.1	3.76565e-05	0.000128731	0.0501427	0.762614	0.0101773	0.000109153	0.000109153	1.07047	0.552107	0.792882	1.07047	0.731834	0.552107	MGRVRTKTVKKTSRQVIEKYYSRMTLDFHTNKKVLEEVSILPSKRLRNKVAGFTTHLMRRIQRGPVRGISLKLQEEERERRMDFVPEKSALEVDEIRVDKETMEMLTALGMADLPGVDRAPEVTSSAPAFGGRQPFNGPRGGNRS	419255	533796	595882	480597	507382	343251	409633	421511	434782	402294	542860	639189	504267	486235	543138	364657	445300	324172	351149	371320	264700	287243	275882	292693	280130
Bradi3g29120.1	0.00198974	0.00385656	0.818869	0.00757893	0.00460113	0.00575993	0.00460113	0.809922	0.0988652	0.809922	0.161421	0.0988652	0.129347	MAHFLLLLALVLALASAAFVLPVAVADPQATQLNLGCSQYNATPTAAFLAALNSTFAELRANLSSGAGGGGGDGGFATAAEPRASAPAFALAQCRPYIAGRDCVACFDAAVARLRPACGAANGGRVILDGCVIRYESAAFFDQATLPGNTQLCNGSAVAAAGFDGAVRALVGNLAAAVPRVPGFAAAAAGGGVYAVAQCVRTVGADGCAQCLEVASRNIDGCSPNSDGRAVDAGCFMRYSDKPFFPANATVDLTPYLSSGESSQKGAIIGGILGGVAFLLLVGLVALLWIRRSRKLQKPQRGDILGATELQGPTSFYYHDLKAATNNFSKESKLGEGGFGDVFKGLLKNGKTVAVKRLTVMETSRAQADFESEVKLISNVHHRNLVRLLGCSRKGPKCL…	24993.1	11220.3	8979.47	12059.1	14313	21972.1	9877.3	8381.78	6138.48	11592.4	2607.03	739.87	2064.12	3830.64	2310.42	2237.75	910.746	1586.98	924.753	1415.06	3478.18	775.086	954.49	2197.64	1851.35
Bradi3g29847.1	6.58688e-07	5.58849e-06	0.05551	2.63549e-05	1.03725e-07	3.43765e-07	1.03725e-07	0.792516	0.323475	0.792516	0.505113	0.323475	0.341626	MKGAEAAAAAKAELEDVGKAAVRAAAPPLSPLSETLWRDKAGLVLLGDVSARLAWRDLTVTVPAAGGGGTQAVLEALTGYAEPGTMTALMGPSGSGKSTLLDALAGRLAANAFLSGTVLLNGRKANLSFGAAAYVTQDDNLMGTLTVRETISYSASLRLPDKMPMEEKRDLVEGTIVEMGLQDCADTVIGNWHLRGVSGGEKRRVSIALEILMRPRLLFLDEPTSGLDSASAFFVTQTLRGLARDGRTVIASIHQPSSEVFQLFDRLYLLSGGKTVYFGQASEACEFFAQAGFPCPALRNPSDHFLRCINADFDKVKATLKGSMKMRFERSDDPLERITTCEAIRKLFSHYQHSQDYLATRQKVDEMARVKGTVLDAGGSQASFGMQACTLTKRSFVNM…	36206.3	52774.9	44560.8	33666.8	41802.2	38780.3	30490.8	30227.4	33017.1	33128.9	21880.8	19440.1	18197.1	24941.3	21114.8	15793.6	13938.9	13817.6	10537.8	13522	14746.1	13892.3	13632.8	14851.6	14280.7
Bradi3g30180.1	2.02353e-06	1.32512e-05	0.18439	9.69031e-05	9.9766e-06	1.81586e-05	9.9766e-06	0.859272	0.413503	0.859272	0.57312	0.413503	0.525661	MAVAELWETLKQAIAAYTGLSPAAFFTAVAVAAALYHVVSGIFAAPPPPRQRPREEPEAEPLPPPVQLGEVDEEELRQYDGSDPKKPLLMAIKGQIYDVTQSRMFYGPGGPYALFAGKDASRALAKMSFEPQDLTGNIAGLGPFELDALQDWEYKFMSKYVKVGTIKKVPVEDGNTSSSPETNETANAEEAKEKEAETAVEAEPAVAAKES	124382	148553	132134	105675	127686	93294.7	104902	125168	115504	109717	56898.2	83507.8	63651.1	88660.1	73179.3	49210.8	47242	52828.2	61913.2	52798.5	63048.7	64808.8	73637.6	66982.8	67119.5
Bradi3g30730.1	0.000612922	0.0013712	0.323545	0.780728	0.00844251	0.281109	0.00844251	1.21253	0.530914	1.21253	1.11574	0.530914	0.775653	MARKAATESKMSSDEVARAVAEEAEERLCVQLGELEAEAMAQAVEYQQHVRELSERLAFMDGVLRSSGLHAVAAGMD	42213.9	49512.6	64179.1	68430.4	56084	64662.5	82774.3	61734.4	62843.4	68003.7	64809.5	71584	66155	47752.1	62575.2	44068.5	27134.7	25282.7	22617.1	29775.8	33543	42444.7	54264	43755.2	43501.7
Bradi3g32210.2	2.18236e-05	8.10664e-05	0.0289237	0.000209484	8.88402e-06	2.58905e-05	8.88402e-06	0.670337	0.24768	0.670337	0.41217	0.24768	0.276675	MSGAVLVAIAASIGNLLQGWDNATIAGAVLYIKKEFSLESQPLIEGLIVAMSLIGATVITTFSGAVADAVGRRPLLIASAVLYFVSGLVMLWAPSVYVLLLARLIDGFGIGLAVTLVPLYISETAPTDIRGLLNTLPQFSGSGGMFLSYCMVFTMSLMPQPDWRIMLGVLSIPSLIYFALTVFYLPESPRWLVSKGRMAEAKRVLQRLRGREDVSGEMALLVEGLGVGKDTYIEEYIIGPDDELADEGLAPDPEKIKLYGPEEGLSWVARPVRGGSALGSALGLMSRHGSMVSQGKSLVDPLVTLFGSVHEKMPEVMGSMRSTLFPNFGSMFSVAEQQQAKADWEAESHRDDEDYASDHGGDDIEDSLQSPLISRQATSVEGKEIAAPHGSIMGAVGRS…	185363	368296	334137	219353	276787	209420	156107	171829	204807	185541	119699	110204	102853	123577	114083	101723	67413.9	53917.7	51164.5	68554.7	80612	62936.6	75956.7	86815.5	76580.2
Bradi3g33040.1	9.79282e-06	4.24505e-05	0.784791	0.000231867	0.000206825	2.28191e-05	2.28191e-05	0.922053	0.423145	0.922053	0.528487	0.478784	0.423145	MGTVLPETTADAGKLQAGADTALTDAWDYKGRPASRAATGGWGCAAMICGAELFERMTTLGIAVNLVPYMTATMHLGSAAAANTVTNFIGTSFMLCLLGGFVADTYLGRYLTIAVFSAVQATGVMVLTISTVAPGLRPAACGDATGQSSECVPANGTQLGVLYLGLYMTALGTGGLKSSVSGFGSDQFDESDDGERKKMMRFFNWFYFFVSIGALLAVTVLVYVQDNVGRRWGYGICAVGILSGLGVFLSGTRRYRFKKLVGSPLTQVAAVTAAAWCKRGLPLPSDPGMLYDVDDAAAAGEDLKGKQKLPHSKECRFLDHAAVVDRESSPATASKWTLCTRTDVEEVKQVVRMLPIWATTIMFWTIHAQMTTFAVEQASVMDRGIGGSGFLIPAGSLTV…	25753.9	18522.7	22494.3	17836.3	21151.8	23419.4	16990.1	18844.1	18758.7	19503.1	10351.2	10537.8	10885.6	12939.2	11178.5	11945.1	12738.8	7741.42	8083.26	10127.1	7874.46	6478.25	11473.5	9974.95	8950.29
Bradi3g33410.1	0.0155555	0.0230851	0.016216	0.0163835	0.016503	0.0165876	0.016216	0	0	0	0	0	0	MTVVNGRDHLGLGLGLSLGIAGTTSSVAAPQRALTGAAPTPGQKTRTASACHEMPLFLRGIDVNRAPDAGHEEEEPGASSPDSTLSTLSGKRGRSAAGAGGREQERVSDDDEDSGSGAGGSRKKLRLSKDQSAVLEDSFNQHSTLNPKQKAALARQLGLRPRQVEVWFQNRRARTKLKQTEVDCEALRRRCDALTEENRRLLREVQALKLPLPHPQLYMRAPPLTMCPSCERVAPSGKPAVAGNSTALGSGPWGPGPVRPVFVDRPAQRA	8.81172	602.428	205.001	219.916	259.039	0	0	0	0	0	0	0	0	0	0	0	0	0	0	0	0	0	0	0	0
Bradi3g33570.1	6.65236e-05	0.000205356	0.00570258	2.89517e-05	0.000601643	0.000602484	2.89517e-05	0.777574	0.588947	0.777574	0.588947	0.716455	0.714366	MAAEQTFIMIKPDGVQRGLIGEVISRFEKKGFYLKAMKLQNVEKSFAEQHYADLSSKPFFGGLVEYIVSGPVVAMVWEGKSVVATGRKIIGATNPLASEPGTIRGDFAVDIGRNVIHGSDSVENARKEIALWFPEGLAEWSSSQHCWVYES	368063	440297	426302	345722	395096	263277	289600	333885	342103	307216	241682	227359	205797	255925	232691	268849	322969	281085	259371	283068	255025	274577	304133	295238	282243
Bradi3g34070.1	5.3082e-07	4.68023e-06	0.0212655	2.59082e-07	3.39347e-07	4.07344e-06	2.59082e-07	0.730071	0.255747	0.730071	0.291877	0.255747	0.318591	MEPQQQPDAAAAAGAGAGEPEVPAGLGLTAAEYAQLRPTVEAYHLYAVGQGQCSSLLAQRIEAPAAAVWAIVRRFDCPQVYKHFIRNCALRPDPNAGAGEDDGELRPGRLREVSVISGLPASTSTERLDLLDDARRAFGFTIIGGEHRLRNYRSVTTVSEIRAAGAAAVVLESYIVDVPEGNSEEDTRLFADTVVRLNLQKLKSVAEANAASNAPAPPPAE	22874.4	34392.8	31237	29709	29553.3	14657.1	21041.8	24338.2	26266.7	21576	10858.4	7926.32	6534.09	9184.89	8625.91	6736.35	9403.44	6474.76	7618.07	7558.16	9121.96	5783.99	9710.58	13045.1	9415.4
Bradi3g34500.2	0.00192744	0.00375101	0.42105	0.00209141	0.00946414	0.00301408	0.00209141	0.79346	0.391353	0.79346	0.391353	0.494184	0.410398	MALQYIEAQRQARPDLADWYADLADLYQRKLWHQLTLKLDQFLQIPAAQTGDTLIQLYNNFISDFETKINLLKLAQFAVIASRQYPDKDAAITFLEGIIAKLRETRESRINEPILHVKMQIAAIHLDKGNQKECKNLLEEGKTTLDGMTDVDPAVHASFYWISSQYHKSLQEFAEFYKNALLYLAYTTVESLSESFKLDLAFDLSLAALLGDNIYNFGELLAHPIINSLIGTKVEWVYHMLQAFNTGNLALYQELCRVHNAALSAQPALVQNEKTLLEKINILCLMEIIFSRPSEDRTIPLSVIADQTKLSTSEVECLLMKSLSVHLIEGIIDEVDSTVHVSWVQPRVLGIPQVKALRERLDSWIGKVHSTLLSVEAETPDLVAA	2996.12	5368.87	5946.49	6291.23	5150.68	3673.09	5267.74	3148.04	4258.56	4086.86	1750.58	2079.86	1402.63	2829.88	2015.74	2718.59	1641.79	3875.19	1945.97	2545.39	2289.78	770.957	2970.76	2423.81	2113.83
Bradi3g34620.1	3.53391e-05	0.000123185	0.00470911	0.000260361	1.42431e-05	4.60992e-05	1.42431e-05	0.522321	0.165027	0.522321	0.349525	0.165027	0.21385	MVVLAASIISKSGKALVSRQYVDMSRIRIEGLLAAFPKLVGTGKQHTYVETENVRYVYQPIEGLYLLLITNKQSNILEDLDTLRLLSKLVPEYSSLDEDGICKTAFELIFAFDEAISLGNKENVTVQQVKQYCEMESLEEKAHKLMMQSKINDTRDIMKKKANELDKIRMEKGKLDKGAYTSISGPRVMEKTFSDMNISGTGFGSGSGLGGLSTDMDSFASKPKGRPSAAATAPGKGFGMKLGKSQKTNQFLESLKAEGEVILEDAQPSSVQSRSSALPPSDPVTVTIEEKLNVIVKRDGGVDNFDVQGTLALQVLNDADGFIQLQIENHDVSGLSFKTHPNINKELFNSQQIVGAKDPNRPFPSGQNETPLVKWRIQGMNESSLPLSVNCWPSVSGNE…	2297.15	3224.8	2219.12	1353.87	2273.73	1400.94	984.11	864.024	1501.4	1187.62	624.889	1060.3	616.968	876.749	794.726	322.613	519.518	470.855	187.923	375.227	492.249	328.878	649.011	474.81	486.237
Bradi3g34697.1	0.0206005	0.0294386	0.999337	0.910032	0.049903	0.0344856	0.0344856	0.970677	0.496983	0.970677	0.887247	0.529833	0.496983	MEPRAAGVSAATGAMEPVLGKLAALLADEHGVFKGFRGDAESLRAELQAMHASLRNVSEAEEPDERAKRWMNAVREFSYDVEDGLDEFVLSADDGSANKADEFVEKMRNWSRETIDHRRMGEEISDTISKASNVAEDPRASFLCREMPELVGIDGPAGELTKMLNGGGENASAQQLKVVSIVGPGGLGKTALACHVYGTFGQQFKYRAFVSVSRKPDVVTILRAILSQVGYDQTIPGDAQLLVDKVTNFIQDKRYFIIVDDVWDVQTWDIIKRAFSKSSCGSRIITTTRIHEVAKSCCASYGGRVYELSPLSIVDSERLFLKIVFNSEEQCPSHLKRVSDKILQKCGGLPLAIIAISGLLTADAHEDQWEQVCSSIRHGPGSNPVVERIMRILFLSYID…	17082.5	11815.5	9978.05	6771.72	11412	17145.6	8190.42	9682.44	9290.84	11077.3	10637.7	8695.69	10382.5	10785	10125.2	4460.48	6055.78	6381.92	7287.56	6046.43	5185.27	5891.99	4694.02	6914.91	5671.55
Bradi3g34810.1	0.000772644	0.0016893	0.479308	0.194749	0.00147072	0.00065148	0.00065148	0.830034	0.396	0.830034	0.754366	0.43738	0.396	MAAALSCSLRCWTITGHHRLLRVVVFLLLSLHHQASSLNFHYDYINTTNKADFGSLGDDCNISDHRAELTSHSDQNYINNLGRLVFPNAMQLWDPATGDTASFSTAFSFGIEALPGMEVGHGMAFFLTGAPVGTASNVPTNSFGGFLALFGPDILTSRGNATGSGGDDYRIVAVEFDTVKDDWDPSARHIGVDLNNISSSLGNYMVLPDDSLVGRVMSARIDYNGSTGRLDVVLRNGSSSDDGNTTYAHSTIVDLRSVLPPQVVVGFSAATSKDRVALQYVLSWSFSTTSPVGNGTSAQPQQRRRHTGSTQVLVGVTVAAVLALLLGTFVGALLWRSRRRRSDDDDESSDEVSSGEEDDDGSWAMEEDLESGAGPRPFRLRKLRAATGNFSEEEKLGQG…	2569.03	2661.46	1735.89	1305.51	2067.97	2079.5	1340.81	1865.3	1580.33	1716.49	1510.31	1775.04	1189.53	1765.16	1560.01	787.195	894.362	968.994	967.405	904.489	741.311	556.551	990.562	987.238	818.916
Bradi3g35680.1	0.00940393	0.0147682	0.934527	0.998267	0.362375	0.0423822	0.0423822	1.19726	0.646697	0.925737	0.972669	1.19726	0.646697	MAGESRGNIAFFATYRPPVPLDIFSSPVPPSSSRDEVHLTDGVSYNYDCRPIPASALKALLRRPKLAADGGATEADVDAGRVSGLVFVSERDGGLETLRIALRFDKDNKTKVFSLADVFGSGDFSGTRLEDSGCFGGGYKVGSRTVDHSLIYVSTKEPVKDRRSPWTVVYKTNLRTGKTERLTPKGAYDLSPAVSPSGKKVAVASFRAEGWQGEIENLKTDIFVMNVEKPPLGRKLLVKDGGWPSWGSENFVFFHRGSDKTLPSGMIETSWAVFRLDVATGETVRVTPEGLDAFTPAAISETKVAVATIRQKSKFSDVRVEAQYRHIEIFDVAAGAPVQQITQKTRPKGDHYNPFVLDGGARVGYHRVRSDLLKPGDDVPRNFHKLESPLKDVGLFRVS…	208881	272539	261780	160969	226042	284436	238591	145781	168216	209256	229395	196674	208798	244592	219865	275625	292181	253048	261676	270632	144436	112910	161876	165502	146181
Bradi3g36150.1	0.000191728	0.000502217	0.0432804	0.000494817	0.000235047	0.000179143	0.000179143	0.690565	0.389372	0.690565	0.437382	0.401634	0.389372	MGSLAIPQRQLFIDGEWRAPALGRRLPVINPSTEAAIGEIPAGTAEDVDAAVAAARAALKRNRGRDWSRASGAVRAKYLRAIAAKIIERKSDLARLEALDCGKPLDEAAWDMDDVAGCFEFFAGHAEALDKRQNAQVSLPENFKCHLRKEPIGVVGLITPWNYPLLMATWKVAPALAAGCTAVLKPSELASVTCLELADVCKEVGLPSGVLNIVTGLGPEAGAPLSSHPDVDKVSFTGSYETGKKIMIAAAPTVKPVTLELGGKSPIVVFDDVDIDKAVEWTLFGCFWTNGQICSATSRLLIHSKIAKEFVERMVAWSKNIKVSDPLEEGCRLGPVVSEGQYEKIKKFVANAKSEGATILTGGVRPKHLEKGFYIEPTIITDVSTSMEIWREEVFGPVL…	99432.3	193181	138577	104991	134046	102902	77771.5	90468	99127.6	92567.2	64152.8	64842.4	46186	59335.3	58629.1	54855.8	58712.7	61000.8	40779.9	53837.3	60813.4	42664.6	53900.2	51396.2	52193.6
Bradi3g36420.2	0.000171322	0.000456746	0.721678	0.39705	0.00126126	0.000142919	0.000142919	0.892978	0.398569	0.892978	0.83741	0.507758	0.398569	MDSIAQDFQPRTFSIKLWPPSESTRLMLVERMTKNLSNESIFSRKYGLLGKEEAHENAKRIEDMCFASADEHFKKEPDGDGSSAVQLYAKETSKLMLDVLKRGPKTTVEPEAPVIDTPPEPADTVFDISGGKRAFIEAEEAKELLSPLTKPGNSYKRICFSNRSFGIGAANVAGPILESIKTQLTEVDISDFVAGRPEDEALDVMRIFSRALEGSVLRYLNISDNALGEKGVRAFKELLESQGNLEELYVMNDGISEEAAKALSELIPSTEKLKVLHFHNNMTGDEGAMSIAEMVKRSPNLESFRCSATRIGSDGGVALAEALGTCTHLKKLDIRDNLFGVEAGVALSKTLPKLHDLVELYLSDLNLENEGTVAIVNVLKLSAPQLEILEMAGNEITAE…	137484	104888	81436	69773	98395.3	102366	74819.6	91213.9	83060.1	87864.8	88274.2	75794.4	82407.6	83112.3	82397.1	52709.4	44457.6	43917	58759.7	49960.9	34892.5	39870.8	45258.3	36847.7	39217.3
Bradi3g36930.1	2.75066e-09	8.83485e-08	0.00302336	2.23327e-11	1.24188e-10	1.46229e-11	1.46229e-11	0.833048	0.495038	0.833048	0.508156	0.539832	0.495038	MAGTGVFADILDGEVYKYYADGEWRASGSGKSVAIVNPTTRQTQYRVQACTQEEVNKVMEGAKVAQKAWARTPLWKRAELLHKAAAILKEHKAPIAECLVKEIAKPAKDAVTEVVRSGDLVSYTAEEGVRILGEGKLLVSDSFPGNERNKYCLSSKVPLGIVLAIPPFNYPVNLAVSKIGPALIAGNALVLKPPTQGAVAALHMVHCFHLAGFPKGLISCVTGKGSEIGDFLTMHPGVNCISFTGGDTGIAISKKAGMVPLQMELGGKDACIVLEDADLDLVAANIVKGGFSYSGQRCTAVKVVLIMETVADTVVEKVNAKLAKLKVGPPEDNCDITPVVTESSANFIEGLVMDAKEKGATFCQEYRREGNLIWPLLLDHVRPDMRIAWEEPFGPVLPV…	849572	1.02214e+06	936427	887178	923830	720080	755064	767143	836089	769594	470156	443156	440981	523504	469449	517837	503644	506696	466673	498713	370709	470958	469022	518632	457330
Bradi3g36970.1	4.94352e-06	2.52606e-05	0.269107	0.130699	0.000386608	0.00855447	0.000386608	1.19981	0.540184	1.16047	1.19981	0.540184	0.671707	MDGATMKVVRNLDLERYMGRWYEIACFPSRFQPKGGANTRATYTLCPDGTVKVLNETWTDGRRGHIEGTAYRADPAADEAKLKVKFYVPPFLPVFPVVGDYWVLHVDEGYQYALVGQPSRNYLWILCRQAQMDEGVYNELVERAKEEGYDVSKLRRTAHPDPPPESQETPRDGGLWWIKSLFGK	93442.5	111297	155954	135449	124036	123695	146557	143668	161841	143940	135972	163516	141806	153983	148819	62454.9	75875.2	54385.7	75292.7	67002.1	80950.4	84736.9	86365.9	81209.5	83315.7
Bradi3g37327.1	7.39787e-06	3.39447e-05	0.041347	3.32867e-06	0.000243911	3.96812e-06	3.32867e-06	0.750457	0.357912	0.750457	0.357912	0.487341	0.361823	MATGFVLNTGAKIPSVGLGTWQSDPSVVGEAVYAAVKAGYRHIDCASAYDNEKEVGLALKKLFEEGVVKREDLFITSQLWCGHHAPEDVPEALGDSLNDLQLEYLDLYLIQLPFRVKKGTNIGNAENYIPPDIPATWGAMEKLHDAGKARAIGVSNFSSKKLGDLLSVARIPAAVNQVECHPGWQQSKLHTFCQSTGVHLSAYSPLSSPGSKWMNGKVLKDPIVISVAEKLGKTPAQVALRWNIQMGHGVLPKSVSEERIKQNLDVNDWSIPDDLLAKFSEIKQVRLLTCDFIVNPDSVYKTLDEFWDGEI	8193.12	8452.1	7853.33	6101.13	7649.92	6243	3436.82	6850.62	6433.31	5740.94	3270.65	2326.11	2575.83	2779.42	2738	3314.7	4822.59	3869.74	2905.45	3728.12	3148.7	2362.5	2464.47	3096.01	2767.92
Bradi3g37640.1	0.00228686	0.0043573	0.716493	0.906035	0.00841786	0.735428	0.00841786	1.11994	0.563913	1.11994	1.07966	0.563913	0.88357	MAVFAHRLLASALLALLLSAASAADTKNNPADELVALLNSNRTAAKASSLADNQGLGCIALQYIKAYKGQCDQVGGNKKPVESSFIDTFAPNCGVQATTLAKLTGRLLACQSTYPPPAQALDMLISDSKSLQVLHSKNHTEVGAAVTGTSGGGPYFWCVLFSNGKPNSSFTVEGGVPKTAHPGCFSGNNDACSSAISSGVSTWRLVSALLFSVATAFAF	418761	559232	588616	526684	523323	701794	551453	521087	570030	586091	465307	510612	518828	765297	565011	230087	262936	319479	367935	295109	551970	444604	478898	374101	462393
Bradi3g37650.1	0.0126725	0.0193244	0.650292	0.18917	0.00335342	0.130105	0.00335342	0.866622	0.50253	0.866622	0.758796	0.50253	0.732237	MDRPAPDQRPSLFSPYQMRRFSLSHRVVLAPMTRCRAIGGLPGPALAEYYAQRSTQGGLLISEGTIISPAGPGFPHVPGIYNQEQIHAWKKVVDAVHAKGSIFFCQLWHVGRASHQVYQPNGAAPISSTDKPVSGRWKILMPDGSYGVYPKPRRLATSEILDIVEQYRQAAINAIEAGFDGIEIHGAHGYIIDQFLKDGINDRTDGYGGSLPNRCRFLLEVTKAVVSAIGSDRVAVRISPAIDHLDAYDSNPLQLGTAVVEWLNALQKESGQLAYLHVTQPRYAAYGQTESGPHGSAEEESRLMRTLRGAYRGTFMCSGGYTRELGLEAVESGDADLVSYGRLFISNPDLVERLRLNADLNRYDRKTFYTPDPVVGYTDYPSLAKPKSRM	8269.51	12848.2	10745.3	11358.7	10805.4	9815.52	8197.78	8822.33	10621.3	9364.23	7118.14	6668.24	9221.89	9788.2	8199.12	7027.43	5234.21	5488.9	3969.7	5430.06	3922.75	7641.66	9659.3	10424.9	7912.14
Bradi3g37790.1	0.000110739	0.000314278	0.0521381	0.00169614	0.00238737	0.672291	0.00169614	1.10843	0.549694	0.724882	0.549694	0.562188	1.10843	MAKFGEGDARWIVQDRADGANVHNWHWAERDCLEWSRARLSALLAGLPVLSGEGGLTLRTTTLDKLDGEAYVNIRKGKVIPGYELSLTLSWEAEATSESGVVKVTGAAEVPYLADENADEDPELRITVRGDEGPLATRAKDAFIARGKPLVLEKIREYVAIMSKGGPAKDELDAKKTPTKAATATGVTATAPAPVAKEAPAPAPAAKEKKAKGKEKEGFKTIEMTEKLNCRAEHIYEILMDENRWKGFTQSNARISKEVGGQFSLFDGSITGVNEELQEGKLIVQKWRFGSWPDGVHSTVRLVFDEPESGVTIIKLKQTDVPEEDRYGNSTVVENTERGWRELIFQRIRAVFGFGI	9995.55	11868.7	11539.2	7967.9	10342.8	9836.85	5807.47	6903.71	7441.35	7497.34	5246.57	5279.88	5027.32	7187.81	5685.4	5364.27	5686.46	3733.8	8473.94	5814.62	11886.7	11162.9	11466.8	11340.7	11464.3
Bradi3g38040.1	0.0205426	0.0293871	0.193266	0.0355676	0.0128846	0.0155282	0.0128846	0.657787	0.407925	0.657787	0.496853	0.407925	0.424867	MAAAPMAPPPPAADDEIVYESMPCIRIYKNRVERYFGSEFIAASTDAATGVVSRDRTISPEVSARLYLPRLDADAPAAKLPVLVYYHGGGFCLGSAFNPTFHAYFNSFAALANVVVVSVEYRLAPEHPVPAAYADSWEALAWVVSHAAGSAGDEPWLSDHADFSRLYLGGESAGANLAHHMAMRVGAEGLAHDTKIRGLVMIHPYFLGSNKVDSDDLDPATRESLGSLWSVMCPTTTGEDDPLINPFVEGAPDLEALACGRVLVCVALGDVLRDRGRNYYDRLRASGWRGEAEIWQVPGKGHTFHLLEPCCDEAVAQDKVISDFLNR	9557.57	6998.56	4058.03	3514.67	6032.21	3066.94	2721.22	5451.04	4632.44	3967.91	3333.33	2962.28	2315.25	3377.62	2997.12	2963.96	2555.36	2746.03	1577.4	2460.69	3595.05	1534.79	2282.99	2838.7	2562.88
Bradi3g39010.1	4.12378e-07	3.78434e-06	0.367108	0.125073	5.94086e-06	4.51535e-05	5.94086e-06	1.1276	0.381049	1.1276	0.817804	0.381049	0.482991	MRRVHLAAVLVLLLPIAVSAAGGAKAPAPAKAPPAPPNITAAMEKGGCKAFAALLSASPDASSTFQSAIDGGVTAFCPSDGAVKSFLPRYKNLTAAGKAALLLSHAVPVYYTRRALKSNNGVMNTLATDGGAGNFNLTVQNVGDQVSVKTAGKGKGAARVESTVYDKEPVAVYGVDAVLEPVELFEPAEVESPAPAPAAHKKAAPKKARHGDDVADAPSPDADDDDEEDDAPPADQRKSSKNNAAAPPGGQCLRWLAVVAVAAAAVLA	55905.8	62443.9	61047.1	59282.1	59669.7	59611.3	66973.8	65912.3	76636	67283.3	43391.9	47346.6	43560.9	60893.1	48798.1	15577.1	17468.6	21716.1	36186.6	22737.1	35721.6	24560.8	29110.8	25886.7	28820
Bradi3g39420.1	0.000394429	0.000935205	0.00097209	0.000262288	0.00235707	0.198355	0.000262288	0.877857	0.667234	0.706047	0.667234	0.732796	0.877857	MTTGGVANVHSDMDSTNKTLLKSDALYKYVLDTTVLPREHQCMRDLRLVTDQHKWGFMQSSADEAQLLGMLIKMSGAKNTIEVGVFTGYSLLATALALPEDGKVVAIDPDRECYEVGKPFIEKAGVAHKVDFREGKGLDRLDELLADPANEGSFDFAFVDADKPNYVKYHEQLLKLVKVGGTIIYDNTLWGGTVALPAGTPMSDLDARFSVAIKDLNTRLAADERIDICQLAVADGVTICRRLV	36765.3	36877.4	41558.9	34887.8	37522.4	25192.7	26203.4	29730.6	24843.5	26492.6	26403.3	24479.6	20414.2	28847.7	25036.2	31633.3	30571.7	25475.9	22304.2	27496.3	36566.7	31975.8	33990.9	29223.7	32939.3
Bradi3g39540.1	8.62722e-07	6.92844e-06	0.198507	0.755906	1.73548e-05	1.11096e-05	1.11096e-05	1.07796	0.40709	0.83717	1.07796	0.450317	0.40709	MGSCLSTQPGDGAAWPQRWRKRRGDEREGAAAAGGGGFGFFSSGGGGGGGKKLPGGGEMTEEELARVAGRTCANGASAVACLHTQQGRKGTNQDAMVVWENFNSSDSVFCGVFDGHGPYGHFVAKKVRDSLPVKLLTQWKTSGNGGTSPQLNGSISASLNSEETASAIDDEWGESVDVDGSDMLPEMFVPLKQSYLKAFKLMDKELKLHPTIDCFCSGSTAVTLVKQGWDLVVGNLGDSRAIMATRDASNHLTAVQLTVDLKPNLPKEAARIQQCRGRVFALQDEPEVSRVWLPNNDSPGLAMARAFGDFCLKDYGLISVPEISYRRLTEKDEFIILATDGVWDVLSNKEAVDVVAAAPSRATAARALVDCAVRSWRLKFPTSKSDDCAAVCLFLDHGN…	35683.3	39101.3	40741.5	44523.2	40012.3	33356.6	34109.7	34508.9	32013.2	33497.1	32327.1	48428.9	47093.2	44676.8	43131.5	20573.1	16564.3	19373.8	15561.8	18018.2	18426.4	10154	23668.5	12905.6	16288.6
Bradi3g39590.1	5.36928e-05	0.000172456	0.0109605	0.000614892	6.95509e-05	1.52177e-05	1.52177e-05	0.747958	0.514042	0.747958	0.646758	0.564659	0.514042	MASETETFAFQAEINQLLSLIINTFYSNKEIFLRELISNSSDALDKIRFESLTDKSKLDAQPELFIHIIPDKATNTLTLIDTGIGMTKSDLVNNLGTIARSGTKEFMEALAAGADVSMIGQFGVGFYSAYLVADRVVVTTKHNDDEQYVWESQAGGSFTVTRDTGESLGRGTKMTLYLKEDQLEYLEERRLKDLVKKHSEFISYPISLWTEKTTEKEISDDEDEEEKKDTEEGKVEEIDEEKEEEKEKKKKKIKEVSHEWSLINKQKPIWMRKPEEITKEEYAAFYKSLTNDWEEHLAVKHFSVEGQLEFKAVLFVPKRAPFDLFDTKKKANNIKLYVRRVFIMDNCEELIPEWLAFVKGIVDSEDLPLNISRETLQQNKILKVIRKNLVKKSIELFFE…	206379	239733	283232	271233	250144	156980	203096	166522	221791	187097	169061	154375	145391	178304	161783	154922	125220	151856	132986	141246	109247	112201	166760	126130	128584
Bradi3g39620.1	1.61703e-05	6.30456e-05	0.000405374	4.96215e-05	2.20903e-05	2.7239e-05	2.20903e-05	0.505084	0.322111	0.505084	0.408186	0.325265	0.322111	MASETETFAFQAEINQLLSLIINTFYSNKEIFLRELISNSSDALDKIRFESLTDKSKLDAQPELFIHIVPDKATNTLTLIDSGIGMTKSDLVNNLGTIARSGTKEFMEALAAGADVSMIGQFGVGFYSAYLVADRVVVTTKHNDDEQYVWESQAGGSFTVTRDTGESLGRGTKMTLYLKEDQLEYLEERRLKDLVKKHSEFISYPISLWTEKTTEKEISDDEDEEEKKDTEEGKVEEIDEEKEEKEKKKKTIKEVSHEWSLINKQKPIWMRKPEEITKEEYAAFYKSLTNDWEEHLAVKHFSVEGQLEFKAVLFVPKRAPFDLFDTRKKANNIKLYVRRVFIMDNCEELIPEWLGFVKGIVDSEDLPLNISRETLQQNKILKVIRKNLVKKSIELFFEI…	52652.6	61961.7	84551	72566.9	67933.1	20345.9	41487.5	26721.8	48692.4	34311.9	34524.7	26693.8	22203.3	27495.5	27729.3	21828.7	15335.5	24538	26682.7	22096.2	17250.2	21529.7	25855.2	22893	21882
Bradi3g39740.1	3.97347e-06	2.17895e-05	0.989478	0.179056	7.37484e-06	0.000568232	7.37484e-06	1.0311	0.344753	1.0311	0.820366	0.344753	0.560512	MEFRAGLFTAAMVAAAMIILSSTPALAQKAKDKSPPAPPADILPPSPAPAPSPHIVNLADLLSVAGPFHTFLDYLEKTDVLKTFQSKANDTKESAEGITIFVPKDSAFSSLRATTFANLTGEELKSLVLYHALPKYYSLAEFNKLSSLNPVPTFAGSQYTLNLTDNMGSIRVKSMWSNPKISSSVYSTRPVAVYEVDKVLLPMQIFKSDPPLAPAPAPAPVDAKADDDAALSPASGKAASAKAKAGEKSAASQGAGGGYLAVAAAGGVMMMLLW	221594	184022	249283	276676	232894	208072	265604	229508	257365	240137	188079	199371	171372	205411	191058	48188.2	46434.3	115869	110672	80290.8	146304	103984	134500	137371	130540
Bradi3g40110.1	0.000452787	0.00105131	0.643465	0.664931	0.00421655	0.19711	0.00421655	1.10895	0.608623	1.10895	1.10577	0.608623	0.807203	MGTAVEAAAFGTVEGVVGEVMRLHRSLPARPSLEEVEAAEALARAADREERARLDAVEALRRSPVVPEELFYVAQEMHRALAGFQCREQKRDATRLLELDALHALFDGLIQRASQCVPSSSSGAAPRITTTTTAAAAASSSSSAVVAAVDRSSLGTNGFNVERKVGKGTGRVSMDDSYVKKAKATMWDGGVAAASSLAPRGTVTANSAKSAAVLVDGSYGDDKEKFSLIKLASMIEVAAKKGARDLNFQGKLMAQIEWIPDSIGKLIGLVTLDISENRLVALPEAIGKLSSLTKLDLHANRIALLPESIGDLRSLICLDLRGNQLTSLPSSLGRLMNLEELDMGANRIVTLPDSIGSLTRLKKLMVETNDLDELPYTIGHCVSLVELQAGYNHLKALPE…	101079	144862	169847	174850	147659	158772	196566	141717	157935	163748	156367	189998	155704	151042	163278	97658.7	98259.8	81593.9	81963.4	89868.9	122310	114969	122168	117317	119191
Bradi3g40140.1	3.44331e-06	1.94353e-05	0.00719991	8.14304e-05	4.67359e-07	4.28897e-06	4.67359e-07	0.612147	0.114719	0.612147	0.387506	0.114719	0.225696	MAGFTGTLLPLLLLLSAAAAAAASPAPSDAVSRFQEYLRIDTAQPAPDYAAAVAFLRDQAAAAGLEARTLEPAAGKPLLVLRWLGRRPSLPSILLNSHTDVVPSEPKKWEHAPFSAALDEASGRIYARGSQDMKCVGMQYLEAIRRLRDAGFVPDRNIYITFVPDEEIGGHEGVELFVTSKEFKEMNVGLVLDEGLASPGEEYRVFYAERSPWWLIIKAKGAPGHGAKLYDGSAMENLMKSVEAIRRFRTSQFDLVKSGEKSEGDVVSVNFAYLKAGTPTPTGFVMNLQPSEAEIGIDIRMPPNVHIEALERRLAEEWAPSSRNLTFEFKQKGTVFDNFGKPAMTLADSSNPWWPVFEEAVKRAGGKLSKPEIFPASTDARYFRQIGIPAFGFSPMANT…	14263.1	15489.4	11573.8	10168	12873.6	6072.05	7072.18	9265.61	9112.23	7880.52	5443.02	5089.91	2317.22	7104.2	4988.59	1026.94	0	1630.02	3250.4	1476.84	3513.43	3475.92	4632.72	0	2905.52
Bradi3g40840.2	5.66946e-09	1.51163e-07	0.120425	2.36521e-05	1.35643e-11	2.82799e-09	1.35643e-11	0.886565	0.385442	0.886565	0.67355	0.385442	0.424016	MAVPLLTTKIVKKRVKQFKRAHSDRYIGLKTSWRRPKGIDSRVRRKFKGCTLMPNIGYGSDKKTRHYLPNKFKKFVVHNVSELELLMMHNRTYCAEIAHNVSTKKRKDIVERAAQLDIVVTNKLARLRSQEDE	41532.4	51714.9	44783.4	43933.7	45491.1	41643.2	41267.5	42831.9	35580.7	40330.8	27525.8	32543.9	27435.8	35056.6	30640.5	17665.6	18450.3	18817.4	15203.4	17534.2	19587.9	19017.3	16301.1	22249.6	19289
Bradi3g40950.1	2.37824e-05	8.67094e-05	0.356819	0.193335	0.933805	0.000298646	0.000298646	1.14389	0.621403	1.11521	1.14389	0.956748	0.621403	MAKQQQKNGAHVPKFGNWDNDGNVPYTLYFDNARKGKAPGAKPMNPNDPLENPDAFSSSYAAAEAAAPPPPQPPAPAAHHERRPSSEVPAPAPPLYPGSPFHRGEPPRRVSGGGGRTSGGGGGGAYSVEQSPSRSPLHPYSRAADYSEASGFGLVANSVDRPRPRRGNETPTRGSAVPKFGDWDSNPASADGYTHIFNKVREEKQTQAKTPGFGKDGAAARGPGQHDDGYVSSSRWCFGWCK	97956.8	101688	103104	86630.7	97345.1	121980	107666	102385	102212	108561	103500	112794	115934	113183	111353	103445	91906.8	86444.9	90742.3	93134.7	70869.4	36100.8	63346.6	71645.4	60490.5
Bradi3g41090.1	0.000456201	0.00105741	0.235689	0.000380881	0.000626488	0.00403026	0.000380881	0.812328	0.482159	0.812328	0.482159	0.502463	0.59527	MARFDPYENNGGTCVAVAGADYCVVAADTRLSVGYSILSRAHSKIAHLADKCVLASSGFQGDIKALQKNLTAKELVYEHNHNKKMSCPAMAQLLSNTLYYKRFFPYYAFNVLGGLDSEGKGCVFTYDAVGSYERTGYSAQGTGATLMMPVLDNQLKSPSPLLLPARDAVTPLSESEAVDLVKDVFASATERDIYTGDSVEIVVINSSGTHRECIELRKD	35418.2	31575.5	24508.8	20180.7	27920.8	18810	23404.4	27907.3	20601.7	22680.9	14743.2	11534.1	10896.4	16675.4	13462.3	12970.6	15508	11036.1	16602.1	14029.2	16868.9	13959.1	18175.2	17478.4	16620.4
Bradi3g41350.1	1.12264e-05	4.7179e-05	0.813119	0.190777	7.14978e-05	0.0118535	7.14978e-05	1.05835	0.52832	1.05835	0.862978	0.52832	0.760924	MATRRRCSHLSAAALLLAVCLSLSPSLATAQTAAPGATQSKCQGDMAHLTECMDYATGHEPSPSSTCCGDISDTQKARPECLCYIIQQVHGAGQAHGTQQLGLRFDRVLALPTACKLAGANVSLCINLLHLTPSSPDYAMFLNASKMTPSTSAPMSDSAAAGSKAPAGLRYGVVAAAVVSAVFSSIF	335633	373060	423851	328287	365208	378769	357112	404583	405610	386518	305289	270741	330163	354472	315166	157338	164212	212953	237283	192946	271071	236979	318753	284776	277895
Bradi3g42000.1	0.000198529	0.000517018	0.000215531	0.00100204	0.000684477	0.000171785	0.000171785	0.451694	0.334247	0.350811	0.451694	0.44008	0.334247	MLFLIAKYLSSSSSRRRGSSKHTAAAPGDNNREMPAAAAVEREREQGCMAGCVPVAMRYKRTGASAKVVTVTASSARTSRHGFVRSAASGLFRDGAAARGRYFTNHESLPPLPEARAEFAAAFPQYSAGAGDGEEAAAAADAIRAREYPHLARHACLDYTGVNLFSHAQMDSSSSSLPSTSSSSPAPAPWQPPFFDVAYRSATLRSQVEQCDSGGIGGGIGRAVARRIMASMKMPEEEYVMVCAANRTSAFRLLAESYAFSSPNSGGRKKKKLLAVYDYESEAVGAMSAAARRRGAEVLHATFTWPGLRLHAADLRKKLLRRHQGLMVFPLVSRMTGARHPYLWMSAAAERGWHVALDASAMGAKDLDTLGLSLLRPDFVVCNFFKVFGENPSGFAGIF…	45516.3	82313	43403.7	47213.9	54611.7	24123	16619.9	17784.1	18106.7	19158.4	24521.5	21480.5	30366.7	22302.4	24667.8	18852.5	29679.4	22762.5	24839.5	24033.5	22552.6	18072.1	14469.4	17921	18253.8
Bradi3g42030.1	1.67023e-08	3.46637e-07	0.0207027	1.20604e-05	3.39135e-11	9.83429e-11	3.39135e-11	0.82125	0.355646	0.82125	0.586766	0.373995	0.355646	MGKGGQGNEVEGENMAAWLVAKDTLKIMPFKLPPLGPYDVRVRMKAVGICGSDVHYLKEMRIAHFVVKEPMVIGHECAGVIEEVGAGVTQLAAGDRVALEPGISCWRCRHCKGGRYNLCADMKFFATPPYHGSLADQIVHPADLCFKLPDNVSLEEGAMCEPLSVGVHACRRAEVGPEKGVLIMGAGPIGLVTMLSARAFGAPRIVVADVDEHRLSVARSLGADATVVVSAAEGDLAAEVERIQAAMGDGGGGEIDVTLDCAGFSKSMSTALEATRPGGRVCLVGMGCNQMTVPLTSAAIREVDVVGIFRYKDTWPLCIEFLRSGKVDVKPLITHRFGFSQKEVEDAFEVSARGRDAIKVMFNL	129945	168735	152195	151794	150667	127713	123517	133976	109735	123735	110746	85938.4	82057.4	74883.8	88406.3	59628.3	48310	55729.4	61727.5	56348.8	45854.4	66435.2	51741.4	50305.4	53584.1
Bradi3g42340.1	0.0055969	0.0094733	0.466308	0.988778	0.984611	0.0236156	0.0236156	1.22849	0.485838	1.22849	1.05876	0.93596	0.485838	MAVPVVDAEYLRQVDRARRALRALIASKGCAPIMLRLAWHDAGTYDVNTRTGGANGSIRHEEEYNHGSNAGLKIAIDLLDPIKAKYPKVTYADLYQLAGVVAVEVTGGPTVEFIPGRRDSSVCPREGRLPDAKKGAPHLRDIFYRMGLTDKDIVALSGGHCLGKAHPERSGFEGAWTRDPLKFDNSYFVELLKGESEGLLKLPTDKALLDDPEFRRYVDLYAKDEDAFFKDYAESHKKLSELGFTPRSGSTSTKSDLPTAVILAQSAVGVAVAAAVVIAGYLYEASKKK	16455	15807	12953.8	13101.2	14579.2	14869.8	19536.5	20736.5	16499	17910.4	17282.2	12270.6	19259.1	12931.9	15435.9	20946.9	14263.3	12460.8	6911.25	13645.6	5354.05	6699.8	7267.93	9010.79	7083.14
Bradi3g42760.1	0.000595575	0.00133682	0.181861	0.000161392	0.00179227	0.0283456	0.000161392	0.769524	0.36568	0.769524	0.36568	0.49912	0.654329	MASEKHFKYLVLGGGVAAGYAAREFAKHGLQPGELAIISKESVAPYERPALSKGYLAPQNAARLPGFHTCVGSGGEKLLPEWYADKGIELILSTEIVKADLATKTLTSADGATFICEILLIATGSSTIKLTDFGVQGAESNNILYLRDIEDADKLVAAMQAKKDGKAVVVGGGYIGLELGAALKTNNFDVTMVYPEPWCMPRLFTAGIAHFYEGYYASKGINIVKGTVASGFDADANGDVSKVNLKDGRVLDADIVIVGVGGRPLTGLFKGQVEEEKGGLKTDTFFETSVAGVYAIGDVATFPMKLYNEPRRVEHVDHARKSAEQAVKAIKAKETGETAAEYDYLPYFYSRSFEVAWQFYGDNVGETVLFGDNDPATEKAKFGTYWVKDGKVIGVFLEG…	38733.8	41754.9	30058.4	20496.3	32760.9	27728.5	22533.1	26667.5	23912	25210.3	12978.9	13422.1	11424.5	10094.4	11980	19547.1	13064.8	14206.8	18587.7	16351.6	21480	13551.5	25158.5	25555.4	21436.4
Bradi3g42800.6	4.41719e-07	3.97253e-06	0.213767	6.47058e-05	4.26659e-08	1.01283e-06	4.26659e-08	0.869257	0.379897	0.869257	0.552998	0.379897	0.46232	MSKLQSEAVKDAITQIVGDAREKKRKFTETVELQIGLKNYDPQKDKRFSGSVKLPHIPRPKMRVCMLGDAQHVDQAEKLGLACMDVESLKKMNKNKKLVKKLAKKYHAFLASEAIIKQIPRLLGPGLNKAGKFPTLVSHQESLEAKVNETKATIKFQLKKVLCMGVAVGNLSMDEKQIQQNIQMSVNFLVSLLKKNWQNVRCLYVKSTMGKRVRVF	185298	198915	171538	151540	176823	124310	185073	148562	156873	153704	87306.3	88408.9	105764	109651	97782.6	65029.9	65378.4	65845	72444.2	67174.3	57462.9	94541.2	85872.4	89118.3	81748.7
Bradi3g43475.1	3.30197e-06	1.89547e-05	0.0014634	0.000346895	6.90564e-07	4.0127e-07	4.0127e-07	0.628049	0.315033	0.628049	0.574195	0.315033	0.353962	MVLQNDIDLLNPPPELEKRKHKKKRLVQSPNSFFMDVKCQGCFNITTVFSHSQTVVVCPGCQTVLCQPTGGKARLTEGCSFRRKGD	32781.5	38080.5	38250.1	26716.1	33957	17756.6	17485.6	24963.4	25101.1	21326.7	16270.6	19930.4	20949.9	20841.1	19498	10086.2	15640.4	8641.35	8422.44	10697.6	12259	7044.5	14830.7	13943.8	12019.5
Bradi3g43560.1	4.77076e-09	1.36931e-07	0.0274253	2.66139e-07	9.38069e-11	7.44715e-12	7.44715e-12	0.828346	0.310176	0.828346	0.468406	0.310176	0.332805	MGISRDSMHKRRATGGKQKAWRKKRKYELGRQPANTKLSSNKTVRRVRVRGGNVKWRALRLDTGNYSWGSEAVTRKTRLLDVVYNSSNNELVRTQTLVKNAIVQVDAAPFKQWYLTHYGVDIGRKKKTPAATKKDATETLQDGDAAAPAAAAAEETKKSNNVQRKLEKRQQGRTLDPHIEEQFSSGRLLACISSRPGQCGRADGYILEGKELEFYMKKLQKKKGKGAAA	56088.7	68964.2	64250.2	54303.4	60901.6	45259.7	55700.9	52159.6	48670.2	50447.6	26199.8	27790.1	24804.6	35312.3	28526.7	20010.3	23782.3	18380.4	13387.9	18890.2	22855.6	17036.7	23218.8	17962.2	20268.3
Bradi3g43840.2	4.68969e-05	0.000153927	0.275247	0.000682217	6.1496e-05	9.1524e-05	6.1496e-05	0.810266	0.347172	0.810266	0.477007	0.347172	0.359876	MARIKVHELRGKNKAELQGQLKDLKAELSLLRVAKVTGGAPNKLSKIKVVRTSIARVLTVISQKQKAALREAYKNKKLLPLDLRPKKTRAIRRRLTKHQLSLKTEREKKREKYFPMRKYAIKA	99683.1	113152	142673	109828	116334	87879.5	121196	87027.8	80942.1	94261.4	66252.2	70800.2	28817.7	56098.2	55492.1	67523.9	48594.5	26258.1	19175.1	40387.9	47982.8	30993.8	39840.1	48646.4	41865.8
Bradi3g44160.1	0.000955845	0.00201789	0.00164238	0.00416322	0.00069305	0.00100222	0.00069305	0.713027	0.647751	0.677994	0.713027	0.647751	0.665649	MVKFTAEELRRIMDKKNNIRNMSVIAHVDHGKSTLTDSLVAAAGIIAQEVAGDVRMTDTRADEAERGITIKSTGISLFYEMTDESLQMYKGERDGNEYLINLIDSPGHVDFSSEVTAALRITDGALVVVDCIEGVCVQTETVLRQALGERIRPVLTVNKMDRCFLELQVEGEEAYQTFSRVIENANVIMATYEDKLLGDVQVYPEKGTVAFSAGLHGWAFTLTNFAKMYASKFGVDESKMMERLWGENFFDPTTKKWTTKNTGSATCKRGFVQFCYEPIKQIINTCMNDQKDKLWPMLKKLGVTMKNDEKDLMGKALMKRVMQTWLPASRALLEMMVFHLPSPSKAQRYRVENLYEGPLDDVYATAIRNCDPEGPLMLYVSKMIPASDKGRFFAFGRVF…	2.71345e+06	2.26728e+06	2.18043e+06	1.7102e+06	2.21784e+06	1.35448e+06	1.48873e+06	1.38081e+06	1.79071e+06	1.50368e+06	1.63367e+06	1.56185e+06	1.63025e+06	1.49976e+06	1.58138e+06	1.18444e+06	1.46561e+06	1.57557e+06	1.52081e+06	1.43661e+06	1.53571e+06	1.43817e+06	1.3467e+06	1.58464e+06	1.4763e+06
Bradi3g46080.1	1.0103e-06	7.87801e-06	0.0498949	2.01504e-06	4.07428e-07	4.87136e-07	4.07428e-07	0.822582	0.477013	0.822582	0.506646	0.483595	0.477013	MEVGFLGLGIMGKAMATNLLRHGFRVTVWNRTLSKCQELVALGATVGETPAAVVAKCKFTIAMLSDPRAALSVVFDKDGVLEQIGEGKGYVDMSTVDAETSCKISEAIKQKGGAFVEAPVSGSKKPAEDGQLVVLAAGDKALYDDMVPAFDVLGKKSFFLGEIGNGAKMKLVVNMIMGSVMNAFSEGLCLADESGLSPQTLLDVLDLGGIANPMFKMKGPSMLQGSYNPAFPLKHMQKDMRLALSLGDENAVAMPVAAAANEAFKKARSLGLGDQDFSAVHEVLKGAGGSGQA	341942	416596	418632	340684	379464	292704	368377	290540	296940	312140	191105	195929	179734	202247	192254	213209	201418	160772	158629	183507	129188	162501	222983	209365	181009
Bradi3g47410.1	4.23276e-06	2.25983e-05	0.0380707	0.000100435	2.58745e-05	5.07453e-06	5.07453e-06	0.729943	0.278502	0.729943	0.453184	0.278502	0.291071	MAPTSKMALGIKRASRSHSYHRRGLWAIKAKHGGAFPKAEKPAAVAEPKFYPADDVKPRNPSTRKPNPTKLRSTITPGTVLILLAGRYMGKRVVFLKQLKSGLLLITGPFKINGVPIRRVNQTYVIATSTKVDISGVKVEKFDDKYFARDKKARAKKTEGELFETEKETTKNLPDFKKDDQKTIDAELIKAIEAVPDLKNYLGARFSLRDGDKPHEMTF	13009.1	17463.1	16267.9	12039.4	14694.9	9484.75	10219.8	9963.14	13238	10726.4	6384.04	8975.14	7400.5	3878.27	6659.48	3961.54	3743.6	3022.66	5642.42	4092.55	6672.93	2928.44	2502.54	5005.1	4277.25
Bradi3g47840.1	6.25954e-06	2.98379e-05	0.842508	0.000972862	1.69059e-06	0.000470627	1.69059e-06	0.934054	0.36056	0.934054	0.609184	0.36056	0.580312	MAGTCAHVEFLRAQPWWALALAAVGLLVAARAALRLALWLYAAFLRPGKPLRRRYGPWAVVTGATDGIGRAIAFRLAASGLSLVLVGRNPDKLAAVSEEIRAKHTRAEVRTFVLDFAGEGLAAGVDALRESIRGLDVGVLVNNAGVSYPYARYFHEVDEDLMRSLIRVNVEGVTRVTHAVLPGMVERKRGAIVNIGSGAASVVPSDPLYSVYAATKAYVDQFSRCLYVEYKGKGIDVQCQVPLYVATKMASIRRSSFLVPSADTYARAAIRHIGYEPRCTPYWPHSVMWFLISLLPESLVDSTRLSMCIKIRKKGQAKDAKKKAQ	176364	257138	244729	214930	223290	152069	218755	214109	249327	208565	133724	127287	140522	142566	136025	70827.1	66429.5	91798.2	92983.6	80509.6	114234	148394	118664	137020	129578
Bradi3g47880.1	0.00178779	0.00351565	0.137461	0.00293584	0.00128863	0.00335218	0.00128863	0.734865	0.443478	0.734865	0.494577	0.443478	0.50351	MDGGGGNGGGEDGKQEKHLVLAHKLFLLSHPDVDDLSKVALRSEVLSAVKSDDMAPLFESLSAAGVLEPDASLVAEMRARIDEEIRKLDEKIADAEENLGESEVREAHLAKSLYFVRVGEKEKALEQLKITEGKTVAIGQKMDLVFYTLQIGLFYMDFDLISKSIDKAKKLFDEGGDWERKNRLKVYEGLYCMATRNFKKATSLFLDSISTFTTYELFPYDTFIFYTVLTSIISLDRVSLKQKVVDAPEILAVIGKVPHLSEFLYSLYNCQYKSFFVAFSGLTEQIKLDRYLQPHFRYYMREVRTVVYSQFLESYKSVTMEAMASAFGVTVDFIDQELSRFIAAGKLHCKIDKVAGVLETNRPDERNAFYQSTIKQGDFLLNRIQKLSRVIDL	10237.1	11840.3	11968.2	7350.56	10349	6162.05	7469.09	9316.72	7472.65	7605.13	4949.37	6348.57	3911.59	5264	5118.38	6094.08	3991.1	5566.34	2706.73	4589.56	8725.45	2959.48	5034.37	4124.01	5210.83
Bradi3g47910.1	6.49903e-06	3.08651e-05	0.00192895	2.54423e-05	2.6708e-06	9.38602e-06	2.6708e-06	0.657764	0.409217	0.657764	0.475365	0.409217	0.416506	MSGGSTRSSTSSGRISSTTLSDLKDLELSPESGCLSIVVLGASGDLAKKKTFPALFNLFQQGFLQSGEVHIFGYARSNISDDGLRERIRGYLKGASEEHLSQFLKLIKYVSGSYDSSEGFELLNKAISWNETSEKNQPGNYRRLFYLALPPSVYPSVCKMIRTYCMAPSSHTGWTRVIVEKPFGKDLGSSEELSSQLGELFNEQQLYRIDHYLGKELVQNLLVLRFANRFFLPLWNRDNIANVQIVFKEDFGTDGRGGYFDQYGIIRDIIQNHLLQVFCLVAMEKPVSLSPEHIRDEKVKVLQSVDSIKHDEVVLGQYDGYKDDPTVPNESNTPTFASVVLRVHNERWEGVPFILKAGKALNSKKAEIRVQFKDAPGDIFRCKKQGRNEFVIRLQPSEA…	45205.8	49168.2	59152.2	49020.1	50636.6	24468.4	33545.3	33477.9	41736.1	33306.9	27973.4	23517.1	15492.7	29300.2	24070.8	20049.9	27072.8	17909.6	17853	20721.3	16314.8	24589.4	23440.4	20017.2	21090.4
Bradi3g48790.1	0.006275	0.0104368	0.0632264	0.00333065	0.00501519	0.0158414	0.00333065	0.528495	0.257711	0.528495	0.257711	0.296618	0.400227	MDTPQQPCPAQTATTTVGDESVFKPLGHEPAEHQLKLHGSHHHPGKPRRNGCRVVWVYDQAEVAGQSLVPSSFQPVKLYMLILLAWFVFSYGVGSIHCSTVPGNSTDVAALLDFKNAITIDPQGVLSTYWNASTPYCQWKGVKCSLRHPGRVTALELSAQGLSGPIAASVGNLTFLRTLDLSRNNFSGQIPHLNNLQKIQIINLNYNPLGGIIPETLTNCSSLKELSLYGNLLEASIPPQIGVLSNLVYLDISQNNLTGIIPSTLGNITYLREIYLGQNKLEGSIPDELGQLSNISILFLRENSLSGSIPVSLFNSSSLQQLELSVNPLDDTLPTNIGDHLPNLQKLYLSNNMLGGQIPASLGNITNLDTINFQKNSFTGEIPSSFGKLSSLVRLDLQG…	104062	46754.3	39196.6	45981.9	58998.8	47970.8	34244.7	21058.4	21448.4	31180.6	16411.3	14043.9	14019.4	16344	15204.7	25726.1	11509.4	20920	11845	17500.1	28171	19566.8	25186.5	21527.4	23612.9
Bradi3g49160.1	0.0141911	0.0214617	0.413178	0.638664	0.946471	0.0412264	0.0412264	1.23271	0.411502	0.692355	1.23271	0.884194	0.411502	MQPAETCLRRCGNIDIPYPFGVGSGCHLETGDWTFSLSCNRTADGRHRLYNYQIEVLDMSVRRGQLRIYSLINPWCYNATTGGMNSQNNWWYNMSITNFRINDALNRFTVVGCNSLAYIRSLNETADRYMTGCMAMCPGVGRLENGSCAGVGCCQTAIPSGLNAYQISFEEKFNNTGDTAGFSPCSYAVLVEAAAFDFRTTYVTTDEFVVANDRQVPLVLDWAIGNKTCDEAKGNASAYACVSGNSECVDSKYGRGKGYLCNCSAGYDGNPYLLNGCHDINECEDKSVRYPCSVPGTCVNTMGGYNCVCPRKTSGNAYSGTCEEDKSQLGWQIAIGVSVGVIILIAAASCAYMVFAKRRLAKIKREYFKQHGGLSLFDEMRSRQGLSFTLFTQEELEEA…	41154.4	30690.1	21799.3	15494.9	27284.7	25633.8	18010.6	13094.9	18823.4	18890.7	32385.9	17714.8	39630	44805.5	33634.1	20359.9	24489.1	30490.8	21160	24125	11831.4	8329.89	15906.2	8843.23	11227.7
Bradi3g49230.1	3.14278e-06	1.85136e-05	0.000484333	6.14326e-06	9.00889e-07	5.10701e-06	9.00889e-07	0.761908	0.621434	0.761908	0.655181	0.621434	0.624548	MAASSSYDGVLLGMGNPLLDISAVVDEAFLTKYDVKLNNAILAEEKHLPMYDELSSKGNVEYIAGGATQNSIRVAQWMLQVPGATSYMGCIGKDKYGEEMKNAAQAAGVTAHYYEDEAAPTGTCAVCVVGGERSLIANLSAANCYKSEHLKKPENWALVEKAKYIYIAGFFLTVSPDSIQLVAEHAAENNKVFLMNLSAPFICEFFRDAQEKVLPYVDYIFGNETEARIFSKVRGWETENVEEIALRISQLPLASGKQKRIAVITQGADPVVVAEDGKVKTFPVILLPKEKLVDTNGAGDAFVGGFLSQLVQGKSIEDSVKAGCYAANVIIQRSGCTYPEKPDFN	675453	808705	817930	686176	747066	529945	550161	570102	626574	569196	487747	506198	412133	551775	489463	449959	508929	467959	430163	464252	446565	451996	487114	480639	466579
Bradi3g49250.2	1.36177e-07	1.68535e-06	9.32722e-07	9.5001e-10	2.09164e-07	2.70753e-07	9.5001e-10	0.429842	0.2773	0.429842	0.2773	0.365521	0.394959	MAGNGAISEKDPLNWGAAAAELTGSHLDEVKRMVAQFREPVVKIEGASLRVGQVAAVAQAKDAAGVSVELDEEARPRVKASSEWILSCLAAGGDIYGVTTGFGGTSHRRTKDGPALQVELLRHLNAGIFGTGSDGHSLPAEVTRAAMLVRINTLLQGYSGIRFEILEAITKLLNTGVSPCLPLRGTITASGDLVPLSYIAGLITGRPNAQATTADGRKVDAAEAFKVAGIEGGFFTLNPKEGLAIVNGTSVGSALAATVLFDCNVLAVLSEVLSAVFCEVMNGKPEFTDHLTHKLKHHPGSIEAAAIMEHILAGSSFMSHAKKVNEIDPQLKPKQDRYALRTSPQWLGPQIEVIRSATKSIEREVNSVNDNPVIDVHRGKALHGGNFQGTPIGVSMDNT…	115290	90243	138329	123441	116826	44371.9	50006.6	55408.9	51079.6	50216.7	33579.3	33005.8	29256.6	33741.8	32395.9	48610.4	54474.3	38316.7	29408.1	42702.4	53901.1	37335.6	51876.2	41453	46141.5
Bradi3g49360.1	9.16951e-08	1.21355e-06	0.0747293	1	1.72851e-07	2.26235e-06	1.72851e-07	0.998671	0.424149	0.843149	0.998671	0.424149	0.495635	MAKDIEASAPEGGEFSAKDYSDPPPAPIVDFEELTKWSLYRAAIAEFVATLLFLYITVATVIGYKHQTDVSASGPDAACGGVGILGIAWAFGGMIFVLVYCTAGVSGGHINPAVTFGLFLARKVSLVRAVLYIVAQCLGAICGVGLVKGFQSAYYVRYGGGANELSAGYSKGTGLAAEIIGTFVLVYTVFSATDPKRNARDSHIPVLAPLPIGFAVFMVHLATIPITGTGINPARSLGAAVIYNTDKAWDDQWIFWVGPLIGAAIAAAYHQYVLRASAAKLGSYRSSS	1.61149e+06	1.68784e+06	1.97647e+06	1.73752e+06	1.75333e+06	1.75022e+06	1.67881e+06	1.17902e+06	1.30522e+06	1.47832e+06	1.68657e+06	1.75367e+06	1.73625e+06	1.8275e+06	1.751e+06	719453	857752	668208	729278	743673	892983	806812	976474	799777	869011
Bradi3g50110.1	0.00506257	0.00866676	0.0739981	0.00253843	0.00478625	0.169613	0.00253843	0.79265	0.567831	0.745763	0.567831	0.606161	0.79265	MADEAKAKGNAAFSAGRFEEAAQHFSDAIALAPGNHVLYSNRSAALASLHRYSDALADAEKTVELKPDWAKGYSRLGAAHLGLGDAASAVAAYEKGLALDPSNEGLKAGLADAKKATAAPPRRSPSGADAIGQMFQGPELWSKIASDPATRAYLEQPDFMQMLREVQRNPSSLNMYLSDPRMMQVLSLMLNIKIQRPEDSELPEASSPSSPPQRQQEQPKPKAREVEPEPEPMEVNDEEKERKERKAAAQKEKEAGNASYKKKDFETAIQHYTKAMELDDEDISYLTNRAAVYIEMGKYDECIKDCDKAVERGRELRADFKMVARALTRKGTALAKLAKTSKDYDLAIETFQKALTEHRNPDTLKRLNEAEKAKKDLEQQEYYDPKLADEEREKGNEFF…	26851.8	38149.1	34545.6	27528.9	31768.8	26950.9	21108.9	22649.7	24058.5	23692	17319.8	16633.2	15298.8	22905.5	18039.3	18872.3	16281	17528.8	24346.1	19257	19155.2	19984.1	31684.1	29902.8	25181.6
Bradi3g50420.1	0.000328008	0.000800149	0.999642	0.0128585	0.000442285	0.0351713	0.000442285	1.021	0.267987	1.021	0.507006	0.267987	0.580707	MAAAAVPQVHIESVQTGLPTRVVEPDRTRLIAVAAPPLPEAALQRRFRAVLYYRGGEQKAEWEEGVWVKESLGEVLCFYPEMAGRLRRRGDGSWEVKLNDAGVRFQQATVEATMEDFLADKDRVRKESALAPWIDVTAEDPDMCSLLFMQLNRFQDGGYAVGVSCTTLLADPLALARFLLAWARTHAEMKEQNKAAIRPMMQYMAYFQRPEICCKRIRSYPIDSAASAEDNGLHAHTALFRTTNAATAASPESRRALARACIARASEELGGAGAGIRAPPRFSLVVAPEDSARGGTTIETVTADAGGGHAALEAAQWSDLGLEELTLRDAKPVQVSCRIVTRGDEGLVVVMPDGDGFLVSATIPM	38671.2	51996.5	46657.7	29956.7	41820.5	25277.5	37201.1	51043.5	57272.6	42698.7	19441.8	17172.3	19581.7	28617.3	21203.3	8370.48	5671.25	12545.3	18242.4	11207.4	27446	26253.9	20034.6	23407.4	24285.5
Bradi3g51680.1	0.00336509	0.00609331	0.141736	0.00413876	0.00323249	0.00425811	0.00323249	0.688106	0.408484	0.688106	0.424491	0.408484	0.424099	MAVSTNGSSAPALKFLIYGRTGWIGGLLGKLCTAQGIPFAYGAGRLENRAQLEADIDEVAPTHVFNAAGVTGRPNVDWCETHRVETIRANVCGTLTLADVCRARGLVLINYATGCIFEYDAGHQLGSGVGFKEEDTPNFVGSFYSKTKAMVEELLKNYENVCTLRVRMPISSDLSNPRNFITKITRYDKVVDIPNSMTILDELLPISIEMAKRNLTGIWNFTNPGVVSHNEILEMYRDYIDPSFSWKNFNLEEQAKVIVAPRSNNELDTVKLKTEFPELLSIKESLIKNVFKPNQKTTKA	8901.04	16982.5	13784.5	10081.6	12437.4	9477.81	7219.68	7602.75	9932.83	8558.26	5241.96	3694.98	3858.35	8323.03	5279.58	5313.5	4993.48	3948.5	6066.46	5080.48	9597.4	3351.75	1888.51	6261.14	5274.7
Bradi3g52020.1	0.00788081	0.0127933	0.0348182	0.894678	0.0274089	0.007946	0.007946	0.860348	0.257241	0.410024	0.860348	0.384683	0.257241	MPSSSASTNSFFAIVPLDGGETCRHAMDACYLCGKPLSRICDIFMYRGDTPFCSEECRGVQMEEDEVRERTNAKILKERAARKEQGHGTSTSESNITCAANVPVAS	5784.04	12680.8	12872.7	9138.26	10119	5017.13	3751.69	2657.88	5169.35	4149.01	3416.18	6356.1	14234.3	10816.7	8705.82	4206.95	1083.26	7002.86	3277.29	3892.59	2546.59	1730.73	2824.42	3310.29	2603.01
Bradi3g52140.1	0.000926642	0.00196547	0.111253	0.000892353	0.000596608	0.0121347	0.000596608	0.651164	0.237159	0.651164	0.278697	0.237159	0.475945	MASPALKDAVGVLDRDPFVALLAKLIGETQRLQNDPPALVPQEDLVAQHVLDALRPVSTDTGGGPLIVRKVSYTEGRSNVIVEYPGTVPGRVVSFVGMHMDVVPANPNEWDFDPFSLTFDSDDKEKLRGRGTTDCLGHVALVTQLMWKLGEMKPALKHSVIAVFIANEENSSVTGIGVDGLVKDGLLDKLKTGPLFWIDTADKQPCIGTGGMIPWHLKATGKLFHSGLAHKAINSMELNMDALKEIQTRFYKDFPPHEKEKLYKFATPSTMKPTKWSYPGGGLNQIPGECTISGDIRLTPFYSTTLVVEKLQEYVDDLNGGLETKLPTRGPVSKYVLPDENLRGRLDISFDGDVMNGVACNLESRGFQALCKATEEIVGYVEPYSITGSLPLIRELQDE…	8061.99	15425.5	15280.6	15378.7	13536.7	5411.06	9342.76	7386.52	13118.1	8814.62	4389.78	5951.28	2236.98	2512.52	3772.64	4278.6	3077.27	2048.77	3436.79	3210.36	1951.63	10615	8242.56	4961.72	6442.73
Bradi3g52290.1	0.00184427	0.00360567	0.79359	0.00134257	0.00738738	0.046463	0.00134257	0.8705	0.328293	0.8705	0.328293	0.454219	0.592103	MGEIAADERGLGAAVGKGEEEEEEETSPIEEVRLTVPSGDDASLPVWTFRMWSIGLVSCALMSFLNQFFSYRTEPLIVTQITVQVASLPMGHFLARVLPARKFPVPALLGGGEWSLNPGPFNMKEHVLISIFANAGYAFGNGNAYAVMIVDIIRAFYRRSISFVAAWLLIMTTQVLGYGWAGLMRKYVVEPAHMWWPGTLVQVSLFRALHEKEEFPRGSRQISRSKFFLVALICSFGWYAVPGYLFPSLTSISWVCWVFSKSVTAQQLGSGMKGLGLGAFTLDWSAVSSFLFSPLISPFFATANIFVGYVMFLYVIVPTAYWGVNLYNAKTFPIFSSHLFTSNGSAYQINDIVNQQFQLDRDAYDKIGRINISTFFALSYGLSFATIASTITHVGIFYG…	22258.1	15121.4	23650.9	18435.8	19866.5	15065.5	13110.3	23076.7	17922.7	17293.8	7599.31	5601.23	3483.06	9404.57	6522.04	9424.02	7523.35	7371.29	11776.4	9023.76	21223.8	7336.92	8031.6	10459.9	11763
Bradi3g53260.1	7.40411e-07	6.1277e-06	2.014e-05	1.17575e-05	1.30794e-07	9.71522e-08	9.71522e-08	0.387008	0.138576	0.38265	0.387008	0.181207	0.138576	MDSDYGVPRELSEVQKQRTLYQPELPPCLQGTTVRVEYGDVAIAADPTGAHVISHAFPHTYGQPLAHFLRKAAIVPDAKVISEHPAVRVGVVFCGRQSPGGHNVIWGLHEAIKAHNLNSKLIGFLGGTDGLLAQKTLEITNEVLSSYKNQGGYDMLGRTKDQIRTTEQVKGAMASCQALKLDALVIIGGVTSNTDAAQLAETFAEAKCATKVVGVPVTLNGDLKNQFVETTVGFDTICKVNSQLISNVCTDALSAEKYYYFIRMMGRKASHVALECALQSHPNMVILGEEVAASKLTIFDITKQICDAVQARAEKDKYHGVVLIPEGLVESIPELYALLQEINGLHGKGVSIENISSQLSPWASALFEFLPQFIRQQLLLRPESDDSAQLSQIETEKLL…	28737	35449	42233.9	26747.8	33291.9	9191.1	10051.6	10482.6	21231.4	12739.2	11576.5	11983.4	11243.2	16733.8	12884.2	6291.91	3995.32	8076.43	5767.28	6032.73	3516.51	4115.85	5026.32	5795.18	4613.47
Bradi3g53290.1	0.00118543	0.00244892	0.0269807	0.0120893	0.000791278	0.000662687	0.000662687	0.599901	0.352401	0.599901	0.547443	0.368033	0.352401	MEVAAPAPKHKVKKQINLFYCAECEELALKVAASSDAIQLQSINWRNFPDGFPNLFINNAHDIRGQHVAFLASFSSPAVIFEQISVIFALPKLFIASFTLVLPFFPTGSFERVEEEGDVATAFTLARVLSMIPKSRGGPTSVVIYDIHALQERFYFGDDVLPCFETGIPLLLQRLRQLPDAENITIAFPDDGAWKRFHKLLVNFPMVVCAKVREGDKRIVRIKEGNPEGRHVVIVDDLVQSGGTLRECQKVLAAHGAAKVSAYVTHAVFPNQSYERFMTANSAGPGDQFAYFWITDSCPQTVKAISRHSPFEVLSLAGSIADALQI	5344.17	7222.05	12773.5	10319.9	8914.91	4858.95	4972.63	5287.18	6273.48	5348.06	4384.8	5475.7	4331.93	5329.19	4880.41	3312.03	3233.21	3198.35	3380.34	3280.98	2680.83	1441.53	4841.49	3602.63	3141.62
Bradi3g53520.1	0.00471349	0.00816744	0.999638	0.206299	0.0240064	0.00589816	0.00589816	0.983304	0.563354	0.983304	0.778386	0.644502	0.563354	MDQANQPTVLQKFGGQFHLGSSFSEGVRARNMCPSAPAYERRYTTSNYMTQSHFGPAMSAINVPMVSSSPIFANAPAEKGVKSFAIDFLMGGVSAAVSKTAAAPIERVKLLIQNQDEMIKAGRLSEPYKGIGDCFGRTIKDEGFGSLWRGNTANVIRYFPTQALNFAFKDYFKRMFNFKKEKDGYGKWFAGNLASGGAAGASSLFFVYSLDYARTRLANDAKASKGGGERQFNGLVDVYRKTLKSDGIAGLYRGFNISCVGIIVYRGLYFGLYDSLKPVLLTGSLQDNFFASFGLGWLITNGAGLASYPIDTVRRRMMMTSGEAVKYKSSFDAFQQILKKEGPKSLFKGAGANILRAIAGAGVLSGYDQLQIIFFGKKYGSGGA	90761.1	157048	117381	84812.8	112501	93952.1	126970	99990.7	121577	110622	77865.6	76675.3	100470	95264.7	87569	81405.6	65977.1	73703.7	68941.6	72507	47335.2	65364.1	72694	68117.9	63377.8
Bradi3g53600.1	0.0180985	0.026378	0.0560249	0.135694	0.0394082	0.00490681	0.00490681	0.55219	0.19759	0.453509	0.55219	0.415865	0.19759	MTYKKATAALDEAARARLQGPFLSGNAPSAGHEGVDVDDGLVELVHEFYNGYGEEKDAGAKEAKEPRQPPAAWADTLRAALADAAADVAAARIRDEAERAVLDAASGPNVAAGGDGVRKRVADRLRARGFDAAATRPMGAVLSNEQHGLTFLFRDSANRHLQIVVGKKRQRAGGQPRVRGRGAGNGVAVGNAHVGSLHRGGEHRRRVRDGEAQRPVQGAPALAPAGARGDAGGFQGGGRGNVRGGGGVHPGRRHALAAVEAGAVRAGQVVRPIQEISARANRGRGRAGVGGGTAGRSEHHWPRCACCHPAKGVVSRPEALRHGDGHGEGRIGGREAVDVQRMVTQKLNGMRRARVHSVF	1653.32	2463.9	1669.85	797.921	1646.25	417.176	470.508	1094.17	1004.5	746.589	592.84	1167.12	745.915	1130.29	909.041	325.953	1432.31	173.715	806.494	684.617	820.862	442.666	27.8411	9.75822	325.282
Bradi3g54020.1	6.98491e-06	3.24919e-05	4.72974e-05	2.04596e-06	1.51312e-05	1.5891e-05	2.04596e-06	0.71567	0.656078	0.71567	0.656078	0.713008	0.695338	MASAASTSAAVAAVASRLLTRRPTHLLRRLPRAPPAVLSARPSSSSSSFGAAPLRRPLGHRARMGHTSAAASAVPALGLTKPNVVEPPQVNFTAKDIEFSDWTGDVLAVAVTEKDLSKGSDSKFENALLNKLDSQLGGILSEASAEEDFTGKAGQSVVLRLSGQGFKRVGLIGLGQNAPSTTSACRGIGESIASVAKSAQASSAAVLLASPGGIQQEFKLNAAAAIASGTVLGLHEDSRFKSDSKKVHLKQVDLIGLGSGPEVDQKLKYANDLSSGVIFGKELVNSPANVLTPAVLAEEASKIASTYSDVFTATILDVEKCQELKMGSYLGVAAASANPPHFIHLCYKPVGGNVKRKLAIVGKGLTFDSGGYNIKTGPGCSIELMKFDMGGSAAVFGAA…	139589	158253	161811	142734	150597	110588	108409	97060.1	115053	107777	93007.7	105427	85590.1	111188	98803.1	114040	108336	96147.3	110983	107377	105276	98301.6	100277	115007	104716
Bradi3g55220.1	0.000624286	0.001392	0.0473702	0.000819174	0.00107275	0.000531079	0.000531079	0.808599	0.652522	0.808599	0.666506	0.673938	0.652522	MAASTQGQVITCKAAVAWDANKPLVIEDVQVAPPQAGEVRIKILSTALCHTDYYTWSGKDPEGLFPCILGHEAAGIVESVGEGVTDLQPGDHVIPCYQAECKDCKMCKSGKTNLCGKVRAATGVGLMMNDRKSRFSVNGKPIYHFMGTSTFSQYTVVHDVSVAKINPQAPLDKVCLLGCGVSTGLGAVWNTAKVEAGSVVAVFGLGTVGLAVAEGAKSAGASRIIGIDIDSKKFDVAKNFGVTEFVNPKDHDKPIQQVIVDLTDGGVDYSFECIGNVSIMRAALECCHKGWGTSVIVGVAASGQEIATRPFQLVTGRVWKGTAFGGFKSRSQVPWLVEKYMNKEIKVDEYITHNMNLSDINKAFDLLHEGGCLRCVLAMEH	66742	83067.1	76925.4	72797.4	74883	57455.9	66033.2	52396.6	66315.3	60550.3	53537	60875.3	42146.5	43081	49910	49747.7	52339	53871.7	45907.3	50466.4	41771.9	41721.9	50860.9	61096.5	48862.8
Bradi3g55420.1	1.30386e-05	5.34621e-05	0.640453	0.0949432	9.39331e-06	0.000319848	9.39331e-06	0.889341	0.280347	0.889341	0.763262	0.280347	0.469695	MEKAIDRQRVLLAHLAPSASSSAQGQQLSASACAAGDSAAYQRSSCFGDDVVIVAAYRTPICKAKRGGFKDTYPEDLLTPVLKAVLDNTGINPGEIGDIVVGTVLGPGSQRAIECRTASLLAGFPETVPVRTVNRQCSSGLQAVADVAAAIKAGFYDIGIGAGLESMSVNAMGWEGQVNPRVIELQKAQDCLLPMGITSENVAHRYGVTRQEQDQAAAESHMRAAAATASGKFKDEIIPVPTKIIDPKTGEEKKVVISVDDGIRPGTTASGLAKLKTVFKKDGTTTAGNSSQVSDGAGAVLLMRRAVAMSKGLPILGVFRSFAAVGVDPAVMGVGPAVAIPAAVKSAGLEIDDIDLFELNEAFASQFVYCCKTLGLDRSKVNVNGGAIAMGHPLGATGA…	21324.4	34707.6	25343	21606.8	25745.4	20189.5	24122.3	22701.9	24572.3	22896.5	18523.9	16977.5	18691.6	24409.1	19650.5	9169.18	8778.29	6320.31	4602.86	7217.66	15675.4	11548.3	9241.23	11905.2	12092.5
Bradi3g55850.1	0.00921551	0.0145571	0.96984	0.0525611	0.0110222	0.031246	0.0110222	0.903538	0.280894	0.903538	0.445427	0.280894	0.390171	MASRSSSSALAGVAGLVLAVLCCSPATMTEAHTQFGAYNKTCPQAEDVVLKEMTAVLAKSPDLAGPLLRLFSVDCLLGGCDGSILLDSTASNTAEKDSPLNKGLRGFDAVDSIKAKLEAACPGVVSCSDVLALAARDAVRLAGGPYVPVPTGREDGNRSSAADVAPNTPPPDATVADLITFFSRLNLTAKDLAVLSGAHTIGKARCPSFSPRLYNFTTTNNGNNNNATSSDPALDANYTAALRGQCKAGGDMAALVDLDPGSAGVFDLGYYRAVAASKGLLSTDAALLLDADTRAYVLRQANATVPDEFFADFAASFVNMSKIGVLTHHKGEIRRLCSAVNPPSKAASSAAPAKSVTAVIARSLMDLGCVFVLVLTVF	9.08163e+06	1.10628e+07	9.37159e+06	1.04417e+07	9.98941e+06	3.54993e+06	3.82025e+06	1.30677e+07	1.56653e+07	9.02581e+06	4.50698e+06	4.24751e+06	4.39602e+06	4.64769e+06	4.44955e+06	1.50864e+06	1.65465e+06	3.749e+06	4.3116e+06	2.80597e+06	3.74359e+06	3.90484e+06	3.88846e+06	4.05344e+06	3.89758e+06
Bradi3g56527.1	9.16015e-07	7.26885e-06	0.0747704	2.11242e-05	4.71003e-07	9.51892e-07	4.71003e-07	0.831495	0.436264	0.831495	0.55425	0.436264	0.455024	MATPTETAAAASSALTVKDVAPHDFNKKYAAHLKRSGKMELPEWVDIVKTARFKELPPNDPDWYYIRAASIARKIYLRQGIGIGGFQKIYGGRQRNGSRPPHFCKSSGAISRNILQELQKMGIIDVDPKGGRIITSQGRRDLDQVAGTVAPEI	244801	354964	353894	291765	311356	237748	243950	264581	289285	258891	164757	166754	150453	208312	172569	139838	153951	129763	119782	135833	142719	124788	149729	149463	141674
Bradi3g56930.1	0.000821888	0.00178827	0.637728	0.0337632	0.00327162	0.000437118	0.000437118	0.852412	0.33903	0.852412	0.613244	0.456596	0.33903	MFKLPLLRTITRSRIFSLFFKQEMELSLVGLQNAGKTSLVNSIATGGYSEDMIPTVGFNMRKVTKGNVTIKLWDLGGQRRFRTMWERYCRGVSAILYVVDAADRDSVPIAKSELHDLLTKQSLAGIPLLILGNKIDKSEALSKQALVDQLGLESIKDREVCCYMISCKDTVNIDVVIDWLIKHSKTAN	18850.2	39299.4	42955.8	37866.3	34742.9	19995.1	38576.4	28068.1	31821.5	29615.3	25403.1	24072.1	20451	15297.3	21305.9	14681.3	13347.4	18316.5	17108.7	15863.5	11367.9	14567.4	8119.71	13060.5	11778.9
Bradi3g57380.1	0.00257495	0.00483789	0.999997	0.259952	0.97471	0.0167178	0.0167178	1.29241	0.463692	1.00714	1.29241	0.9272	0.463692	MALQAAASFLLPSSALSARKEGAVKDSAFLGVRLVDGLRLETGSLGLRTKRLNTSSVAIRAQATAVSEAPAAPAGKKAVRTGTAIITGASSGLGLATAKALSESGKWHVIMACRDYLKAARAARAAGMAKGSYTIVHLDLASLDSVRQFVSNVRGLGMPIDVVVCNAAVYQPTAKQPSFTADGFELSVGVNHLGHFLLARELLEDLKSSDFPSKRLIIVGSITGNTNTLAGNVPPKANLGDLRGLAAGLNGTASSAMIDGGEFDGAKAYKDSKVCNMLTMQEFHRRFHEETGVTFASLYPGCIATTGLFREHVPLFRFLFPPFQKYITKGYVSEEEAGKRLAQVVSEPSLTKSGVYWSWNQNSASFENQLSEEASDTEKARKVWELSEKLVGLA	2593.17	2884.03	1801.35	1660.71	2234.81	2167.4	2427.04	2116.46	2292.14	2250.76	3134.36	2895.37	2959.97	2563.49	2888.3	1589.16	2595.69	1286.28	2817.34	2072.12	744.224	376.078	1379.02	1645.74	1036.26
Bradi3g57520.1	0.0167116	0.0245795	0.974135	0.0839238	0.0239523	0.0320331	0.0239523	0.894976	0.274107	0.894976	0.427348	0.274107	0.30776	MLLLRPALPVTSTLPFLSPVAAIRRRSSIVAAGMAGVSAASPGAAQIGSFLSKKPYTPPSWASHLSLAPPHTFSLGHFPTPIHKWNLPNLPEDTEVWIKRDDLSGMQLSGNKVRKLEFLLADAVAQGADCVITVGGIQSNHCRATAVAAKYLNLDCYLILRTSKLLVDKDPGLVGNLLVERLLGAHIDLVSKEEYGQIGSVALADLLKKKLLAEGRKPYVIPVGGSNSLGTWGYVEAIREIEQQIQLSGDVQFDDIIVACGSGGTIAGLALGSKLSSLKAKVHAFSVCDDPEYFYDYVQGLIDGLQSGLDSRDIVSIENAKGLGYAMNTTEELKFVKDIAAATGIVLDPVYSGKGAYGMLKDMSSNPAKWKGRKVLFIHTGGLLGLYDKVDQMSSLAGS…	6351.97	10670.9	8145.75	7606.63	8193.8	4569.86	15126.6	4632.77	5003.77	7333.26	4698.62	3358.86	2299.34	3649.59	3501.6	3900.28	314.506	3421.72	1347.39	2245.98	867.766	1683.45	4477.48	3058.19	2521.72
Bradi3g57890.1	0.00233128	0.00442943	0.235703	0.0683385	0.00299834	0.00143609	0.00143609	0.595835	0	0.595835	0.441428	0.0854748	0	MALSDLSRESLLPSFLYTSTAARSFAGASRFPSSSSPQAPSFGGGSAGGRKPFSLQAPNEKIEMYSPAFYAACTAGGIASCGLTHMAVTPLDLVKCNMQIDPAKYKSISSGFGVLLKEQGARGFFRGWVPTLLGYSAQGACKFGFYEFFKKTYSDMAGPENALKYKTLIYLAGSASAEVIADIALCPFEAVKVRVQTQPGFARGLSDGLPKFIKAEGAGGLYKGIVPLWGRQIPYTMMKFASFETIVELIYKHAVPVPKSECSKPFQLGISFAGGYIAGVFCAIVSHPADNLVSFLNNAKGATMGDAVKKIGVLGLFTRGLPLRIVMIGTLTGAQWGIYDAFKVMVGLPTTGGVAPAPPVEAAPVA	1810.93	4282.62	2686.2	1295.09	2518.71	539.916	2871.44	1284.15	1307.45	1500.74	1186.16	502.514	1775.35	983.298	1111.83	397.197	463.948	0	0	215.286	0	0	0	0	0
Bradi3g58240.1	1.83217e-06	1.22965e-05	0.00201433	1.88782e-05	1.21972e-06	9.56347e-07	9.56347e-07	0.542767	0.0871586	0.542767	0.277904	0.167997	0.0871586	MATGGGNLGSVVVAVDGSEESMKALRWALDSVRLRPDGALVVLHVQPRPGIAAGLNPGPIPFGGPREVEVPAFTQAIEAHQRRITEAILEHALKICAEKNVEVKTEVVVGDPKEKICEVAAELKADLLVMGSRAIGPVKRMFLGSVSNYCINSVGCPVVVIKGT	40436.6	69880.7	56366.9	40364.4	51762.1	21746.5	29727.2	21969.4	38936.2	28094.8	12411.8	17197.4	13198.3	14732.1	14384.9	12589.2	11838	4054.77	6301.47	8695.88	4315.2	1756.2	5323.37	6651.3	4511.52
Bradi3g58920.1	3.54998e-05	0.000123426	0.771149	0.0430122	0.0073229	0.0204793	0.0073229	1.42389	0.437386	1.13826	1.42389	0.437386	0.518418	MAAKLAALLLLAFFAVASSAAALPTQTKLTKGGLGDSGMECVYTVYVRTGSIWKAGTDANITLELKTATGNGVLIEDLPRWAGLMPAGHSYFERGSLDIFSGRGPCLGAAPCRMRLASDGTGPHHGWYCNYVEVTVTGPHRGCKQQLFTVEQWLANDAPPYKLEAVVDQCPRNDAAAADGVAQA	6647.77	9562.84	15101.2	14959.9	11567.9	10971.8	13106.9	12360.9	16229.4	13167.3	15704.2	17987.1	17723.2	14471.4	16471.5	3619.44	4352.02	5209.81	7057.3	5059.64	4790.61	7390.39	7682.42	4124.63	5997.01
Bradi3g59970.1	2.24124e-06	1.43901e-05	0.00757293	1.55207e-06	1.17477e-06	1.51646e-06	1.17477e-06	0.727076	0.410679	0.727076	0.442778	0.410679	0.433718	MALLTDLLNLDLSDSTEKIIAEYIWIGGSGMDLRSKARTLSGPVTDPSKLPKWNYDGSSTGQAPGEDSEVILYPQAIFKDPFRRGNNILVMCDCYTPAGEPIPTNKRHAAAKIFSNPAVSAEEPWYGIEQEYTLLQKDINWPLGWPVGGFPGPQGPYYCSIGADKSFGRDIVDSHYKACLYAGINISGINGEVMPGQWEFQVGPSVGISAGDQVWVARYLLERITEIAGVVVSFDPKPIPGDWNGAGAHTNYSTESMRKDGGFQVIVAAVEKLKLRHKEHIAAYGEGNERRLTGKHETADIHTFSWGVANRGASVRVGRETEQNGKGYFEDRRPASNMDPYVVTAMIADTTILWKP	417606	677687	646874	565622	576947	370119	377576	457321	472923	419485	238240	250575	245672	287352	255460	230638	286960	220367	209796	236940	267432	232308	239221	261967	250232
Bradi4g00430.1	1.60746e-05	6.30369e-05	0.295253	0.00268681	8.34039e-06	0.000179935	8.34039e-06	0.866418	0.422291	0.866418	0.668607	0.422291	0.565815	MPMPMPTTPPPAATVLCSLILGFLLLLLPASRAFPLCTDARAPVPLNGTLPFCGYAGSSCCDAASDAALQKQVGAVNVSDAACRAVLKSILCAKCNPYSSELFDAGPKIRTVPFLCNSTSSATSAQSKETTQDYCKLVWDACKNVEIPNSPFQPPLQGGGRLPSSTSKLTDAWQSENDFCTSFGGAPNDRSVCFSGNDVSFNTTQPSPSPKGICLERIDNGSYPYLNMVPHPDGSNRVFLGTQAGKIWLATVPEQGSGGTLQFEAIPFVDLTDQVHFDSAFGLMGMAFHPNFATNGRFFASYNCDRAKSPSCSGRCSCNSDVGCDPSKLGNNNGAQPCQYQVVVSEYSAKGSSSNVSEVTSADPSEVRRIFTMGLPYTSQHGGQILFGPTDGYLYLMMG…	87821	80795.1	80046.5	71900.1	80140.7	80124.4	59015.4	58018	80583.6	69435.4	52351.2	48475.7	62237.7	51265.9	53582.6	36906.6	21921.4	39503.2	37039.4	33842.6	54773.7	36264.6	52193.7	38147	45344.8
Bradi4g00940.1	0.00586855	0.00982218	0.444907	0.00327644	0.0139259	0.0222271	0.00327644	0.822542	0.485924	0.822542	0.485924	0.578262	0.608094	MDEYRCFVGGLAWATDDHNLQSAFSNFGEILDAKIIQDRETGRSRGFGFVTFATEESMQAAIEGMNGKELDGRSITVNQAQSRRGGGGGGGYGGGGGGGGGYGQRREGGYGGGGGYGGSGGGGYGQGQRGGGGYGGGGGGYGGGAGGYGGGYGQQRGGTDGQWRN	16734.4	19129.5	11890.9	9229.11	14246	11266.7	8590.14	14662.5	12352.4	11717.9	6318.45	5989.43	6820.37	8561.59	6922.46	6629.77	9059.02	7799.53	9463.3	8237.91	7959.21	10710.3	8537.73	7444.33	8662.89
Bradi4g01130.2	7.38522e-09	1.84494e-07	2.2977e-05	6.79456e-14	5.87647e-09	7.1488e-07	6.79456e-14	0.729682	0.37853	0.729682	0.37853	0.594423	0.652655	MGEAATPAIAKDVTELIGNTPLVYLNKVTDGCVGRVAAKLESMEPCSSVKDRIAFSMITDAENSGFIVPGKSVLIEPTSGNTGIGLAFMAAAKGYRLVLIMPASMSMERRIILKAFGAELILTDPLLGMKGAIQKAEELAAKTPNSYILQQFENPANPKIHYETTGPEIWRSTGGKIDGLISGIGTGGTITGTGRYLREQNPNIKLYGVEPVESAVLNGKKPGPHKIQGIGAGFIPGVLDVDLIDETVEVSSDESIEMAKALALKEGLLVGISSGAAAAAAIKIAQRPENEGKLFVVVFPSFGERYLSSVLFQSIKKEAESMVVE	905140	996847	941090	849953	923258	703431	661915	669132	660260	673684	357624	348513	293560	398226	349481	599507	568117	550124	477473	548805	507147	562851	676387	663889	602569
Bradi4g02587.1	6.68153e-05	0.000205785	0.0104913	0.000108762	0.000132105	8.43633e-05	8.43633e-05	0.49847	0.0858342	0.49847	0.199563	0.186152	0.0858342	MARRGLMEQDLTKLDVAKLHPLSPEVISRQATINIGTIGHVAHGKSTVVKAISGVQTVRFKNELERNITIKLGYANAKIYKCEDDRCPRPMCYKAYGSGKEDTPICDVPGFENTRMKLLRHVSFVDCPGHDILMATMLNGAAIMDGALLLIAANESCPQPQTSEHLAAVEIMRLQHLIILQNKIDLIQESAAMNQHEAIQKFIQGTIAEGAPVVPISAQLKYNIDVICEYIVKKIPIPERNFTSPPNMIVIRSFDVNKPGSEVDDIRGGVAGGSILRGVLRVNQNIEVRPGIVMKDESGNIKCTPIYSRIVSLYAEQNELQFAVPGGLIGVGTTMDPTLTRADRLVGQVLGEIGSLPDVFVELEINFFLLRRLLGVRTKGTEKAGKVSKLTKGEILMLN…	7157.65	12669.5	16969.8	9951.94	11687.2	3628.57	7899.18	3906.63	7868.53	5825.73	2345.99	3081.49	1032.24	2869.63	2332.34	3407.54	3730.13	1564.73	0	2175.6	823.657	0	1558.38	1630.62	1003.16
Bradi4g03420.1	0.0193536	0.0278781	0.975222	0.47796	0.063333	0.0133096	0.0133096	0.948916	0.608576	0.948916	0.842724	0.700634	0.608576	MGEMNQPPPPPVGVPPPMGMQPMMNPPVGAGAMHPPHEQFHHLAYCVHSNPSWVQVAALAFLHYLVMLGSTVMLASIIVPAMGGSPGDKARVIQSFLFMGGINTLLQTLIGTRLPTVMNASFAFVVPVLSIAREVGQQDFPSNQQRFVHTIRTAQGALIVASVLNMILGYSTVWGAYAKKFSPVIMTPVVCVVGLGLFQLGFPQVGKCVEIGLPMLILAVVVQQYVPHYFRHFHERTTFLFERYSLLLCITIVWAFAAIITAAGAYNHVSLKTQQHCRTDKSYLMSSAPWIKIPLPFQWGTPIFTPGHSFGMMGAVLVSAFESTGAHFATARLAGATPPPAHVLSRSIGLQGIGMFLEGIFAAPCGSSVSVENIGLLGLTKVGSRRVIQISTGFMIFFS…	105212	92883.4	135397	123289	114195	107654	122156	99384	104254	108362	94856.3	128113	79368.7	82602.2	96235.1	103637	97222.9	63005.7	56170.5	80009.1	90891.1	59712.8	65019.1	62363	69496.5
Bradi4g04120.2	4.10301e-08	6.28973e-07	0.0113761	2.70398e-07	1.24977e-09	7.28367e-08	1.24977e-09	0.788937	0.292214	0.788937	0.499445	0.292214	0.443107	MGRVIRAQRKGAGSVFKSHTHHRKGPARFRSLDFGERNGYLKGVVTDVIHDPGRGAPLAKVTFRHPFRYKHQKELFVAAEGMYTGQFVYCGRRATLSVGNVLPLRSVPEGGVICNVEHHVGDRGVFARASGDYAIVISHNPDNGTSRIKLPSGAKKIVPSSCRAMIGQVAGGGRTEKPMLKAGNAYHKYRVKRNCWPKVRGVAMNPVEHPHGGGNHQHIGHASTVRRDAPPGQKVGLIAARRTGRLRGQAAASAAKADKAT	139662	179223	177381	140230	159124	109811	134375	125934	132035	125539	88391.2	85553.9	58895.8	85053.7	79473.6	54759.5	44135.4	45660.2	41437.7	46498.2	77543.2	55800.7	73964.3	74727	70508.8
Bradi4g04390.1	4.3875e-08	6.65027e-07	0.000118305	1.68651e-05	2.83035e-10	2.01124e-10	2.01124e-10	0.615165	0.274962	0.615165	0.526251	0.274962	0.279846	MARKKIREYDSKRLLKEHLKRLAGIDLQILSAQVTQSTDFTELVNQEPWLSSMKLVVKPDMLFGKRGKSGLVALNLDLAQVRQFVKERLGVEVEMGGCKAPITTFIVEPFVPHDQEYYLSVVSDRLGCTISFSECGGIDIEENWDKVKTIALTTEKPMTLDACAPLIATLPLEVRTKIGDFIRGVFSVFQDLDFSFLEMNPFTLVNGEPYPLDMRGELDDTAAFKNFKKWGNIEFPLPFGRVMSPSESYIHELDEKTSASLKFTVLNPKGRIWTMVAGGGASVIYADTVGDLGYASELGNYAEYSGAPNEEEVLQYARVVLDCATADPDGRKRALLIGGGIANFTDVASTFSGIIRALREKESKLKAARMNIYVRRGGPNYQTGLAKMRALGSELGLPI…	93923.4	123834	131766	120252	117444	66296.2	61217.3	79016.5	82459.1	72247.3	53181	60078.4	64943.8	69016.5	61804.9	36984.2	34976.7	31350.4	25858.8	32292.5	22375.4	25453.9	46195	37440.3	32866.2
Bradi4g05450.1	0.000778355	0.00169903	0.716307	0.00324009	0.479673	0.37522	0.00324009	1.26797	0.286019	0.826787	0.286019	0.763738	1.26797	MASATGEVSKSRVLVIGGTGYIGRFIVAASAREGHPTAVLVRDPAPADAAKAAVLQGFRDAGVTLVKGDIYDHESLVAAIKSADVVISAVGYAQLQDQTRIISAIKEAGNVKRFVPSEFGNDVDHVNAVEPAKSLFAGKAGIRRAIEAEGIPYTYVSSNFFAGYFLPNIGQSGVTGLPTDKVQILGDGNVKGIFAVEDDVGTYTIKAVDDPRTLNKTLYLRPPSNTLSHNELVSLWEKKVGKTFERVYIPEDEVLKKIQESPPPLNVVLSLGHSVWVKGDHTNFEIDPSFGVEATELYPEVKYTTVDEYLNRFL	1.45495e+06	928670	745318	742095	967757	1.26848e+06	778471	639088	514480	800129	276359	262032	265985	302810	276797	931169	805729	739393	480160	739113	1.35139e+06	1.10681e+06	1.08885e+06	1.36128e+06	1.22708e+06
Bradi4g06520.1	3.98797e-05	0.000134494	1	0.567424	0.0013983	0.00142981	0.0013983	1.11191	0.587333	0.997526	1.11191	0.587333	0.587697	MGQCGCFGSAQAAKKEQRAEADRLEAQEARARAAEAAQKRQQEYEKSAAGRAARAQIKAMKESKTSNQGQGEPVLKWQMG	5220.39	7408.99	5628.36	4292.64	5637.6	6339.16	5675.13	5489.47	4990.85	5623.65	6549.65	6802.77	5995.93	5725.61	6268.49	2918.61	3275.64	3562.31	3488.02	3311.15	4112.27	2845.49	3186.98	3108.06	3313.2
Bradi4g06910.1	0.00178292	0.00351117	0.03557	0.000267983	0.0607771	0.0323655	0.000267983	0.765814	0.518574	0.739818	0.518574	0.765814	0.736279	MNYIIGAFKPPCDISIIFGEARNRKQVSVKKDNGKTMMVPVFQSMETISGEVSIAPVPGKRIEHMGVKIELLGQIELYFDRGNFYDFTSLVRELEIPGEIYEKKTYPFEFSSVEMPYESYNGTNVRLRYILKVTIGRNYVGNIVEYRDFCVRNYTPAPTINNSIKMEVGIEDCLHIEFEYSKSKYHLTDVIIGKIYFLLVRIKIKNMELEIRRRESTGSGSNTYVETETLAKFELMDGAPVRGESIPVRLFLTPYELTPTYRNINNKFSVKYYLNLVLVDEEDRRYFKQQEITIYRLLDSPQAS	15881.2	15483.6	19587.5	17367.4	17079.9	10911.6	12412.7	12549.6	14670.3	12636	6885.82	8431.52	8790.36	11321.1	8857.21	12261.2	9371.62	16398.5	14288.9	13080	10528.2	15172.5	13732.7	10869	12575.6
Bradi4g07120.1	4.95094e-08	7.25958e-07	0.00569563	5.39308e-07	8.37989e-11	1.46768e-08	8.37989e-11	0.761076	0.297534	0.761076	0.504036	0.297534	0.390736	MVHVNFYRNYGKTFKKPRRPYEKERLDAELKLVGEYGLRCKRELWRVQYALSRIRNAARHLLTLDEKNPRRIFEGEALLRRMNRYGLLAEGQNKLDYVLALTAENFLARRLQTLVFKAGMAKSIHHARVLIRQRHIRVGRQIVNVPSFMVRVESEKHIDFSLTSPFGGGQPGRVKRKNQKKASGGGDAGGDEDEE	186263	227234	227240	199130	209967	133299	170041	162111	173752	159801	116948	116417	75511.6	114447	105831	78712.9	83556.8	45013.8	42605.3	62472.2	88388.4	71126.7	81938.8	86712.4	82041.6
Bradi4g07450.1	0.0187182	0.0270932	0.238105	0.999999	0.0420796	0.0346889	0.0346889	0.994698	0.560402	0.721596	0.994698	0.575255	0.560402	MASAEEEKKKKQEAEAEAGMAIGGKARDARKDGVAREVVRMEKEAVIPVIKPKLVMKLADLIEHDVDRNEFLKLCKKVEYTVRAWYLLQFEDLMQLYSLFDPVSGGKRLEQQNLPPDEIDTLEFNFMTYLFQIMEKSNFKLLSDEEYDIAQSGRYLLNLPIKVDESKLDKKLLTTYFKEHPHDNLPTFADKYIVFRRGVGIDRTTDYFFMEKVDVLISRIWRSLLRVTRIDRLFSKKPQLKSRNDTKKTDEIIEDTEEEDLFVERIRLEKIELSIKNLMSKMTIQEPTFDRMIVVYRRAGTKTKPDRGIFVKHFKNIPMADMEIVLPEKKNPTLTPMDWVKFLISAVIGLVTLVGSLEMPKADVWVVIAIMSGVIGYCAKIYFTFQQNMTLYQNLITKS…	82788.4	113662	200559	153782	137698	93088.2	125284	76191.2	102886	99362.2	130192	168405	117774	131500	136968	105454	72454.6	76547	62390.5	79211.5	61638.8	63465.5	107989	75571.2	77166.2
Bradi4g07880.1	0.000373016	0.000890617	0.0860153	0.0276425	0.00029955	0.00026555	0.00026555	0.578683	0.0720197	0.578683	0.475957	0.0803378	0.0720197	MEGEQSQLGLAGEPPTTASPGAQQGKHDDGVNNDNEDPENQESGNGGIRSLEQPLLKRSNTLTASHLAMVGAKVSHIESLDYEIIENDLFKHDWRRRSNGEVLQYIFLKWALAFLVGLLTGVIASLINLAIENISGLKMLHMVQLVRDKRYWAGFLYFSGINFALTFVAAVLCVVFAPTAAGPGIPEIKAYLNGVDTPNMFGMPQLIVKIIGSICAVSSGLDLGKEGPLVHIGACLANLLSQGGGIRWLRYFNNDRDRRDLITCGASSGVCAAFRSPVGGVLFALEEVATWWRSALLWRTFFSTATVVVVLRGFIEVCRDGRCGLFGEGGLIIFDVSDVTVRYHVGDLLLVTLVGVIGGILGSLYNYLLHMVLRLYNLINDKGKSAKLCLALAVCVFTS…	10480.7	30386.2	39764.5	22315.3	25736.7	16949.4	15327.3	7615.89	19680.8	14893.4	13496.6	9030.06	10021.4	16450	12249.5	1575.7	1530.36	560.128	4604.32	2067.63	1186.88	559.493	1721.32	3946.49	1853.55
Bradi4g08430.1	0.00361548	0.00645998	0.00268453	0.00227155	0.0188599	0.00802055	0.00227155	0.392215	0.197177	0.210429	0.197177	0.392215	0.313321	MAAQAASSPSDGGSPAASAAAAAAAAAASSFPATSLYVGDLDMSVQDAQLFDVFAQIGGVVSVRVCRDVTTRKSLGYAYVNYNTPADAARALEMLNFTPINGRPIRIMYSNRDPSLRKSGTANIFIKNLDKSIDNKALYDTFCVFGNILSCKVATDASGESKGYGFVQYERDEAAHAAIEKLNGMLMNDKKVYVGPFIRKQERDNSPGNVKFNNVFVKNLSETTTEDDLREIFGKFGTITSVVVMREGDGRSKCFGFVNFESPDEAALAVQDLNGKKFDDKEWYVGRAQKKSEREMELKEKFEKNLQETADKYQNTNLYLKNLDDTVDDEKLRELFAEFGAITSCKVMRDSNGASRGSGFVAFKSAEDASRALAEMNNKMVGSKPLYVALAQRKEDRKA…	25751.6	11926.9	37080.1	13852.6	22152.8	3653.68	7215.59	3520.45	4256.65	4661.59	5785.1	4279.09	3478.72	3929.18	4368.02	3631.73	8518.98	6277.29	16326.6	8688.65	6536.85	5769.3	9513.22	5944.35	6940.93
Bradi4g08667.1	2.14715e-06	1.39255e-05	0.0259934	0.000116179	1.0574e-07	4.4283e-06	1.0574e-07	0.769902	0.35136	0.769902	0.578213	0.35136	0.442448	MVKYSTDPANPTKSAKAMGRDLRVHFKNTRETAFALRKMPLGKAKRYLEDVLAHKQAIPFRRYCRGVGRTAQAKNRQSNGQGRWPAKSAKFVLDLLKNAESNAEVKGLDVDALYISHIQVNQAQKQRRRTYRAHGRINPYMSNPCHIELILSEKEEPVKKEPESQIASRKA	146868	194281	210013	160003	177791	121553	137567	137820	150588	136882	107539	114296	83030.1	106340	102801	73186.4	71230	51519.5	53939	62468.7	65593.4	57972.2	105790	85298	78663.3
Bradi4g10920.1	2.71697e-05	9.74786e-05	0.159098	0.000245403	6.85926e-05	0.000161268	6.85926e-05	0.87714	0.628178	0.87714	0.681354	0.628178	0.634204	MLVYQDKLTGDELLSDSFPYKELENGVLWEVDGHWVVQGAVDVDIGANPSAEGGGEDEGVDDQAVKVVDIVDTFRLQEQPAFDKKQFVAYIKRYIKNLTPKLEADEQEVFKKNVEGATKFLLSKIKDLQFFVGESMGDDASVVFAYYKEGATDPTFLYFAHGLKEVKC	171447	184481	196646	169731	180576	136888	165582	162159	168935	158391	113653	137661	99964.9	140867	123036	128010	100736	102748	122243	113434	97918.1	113097	130760	116314	114522
Bradi4g13400.1	4.07126e-05	0.00013662	0.0158701	0.00018148	8.38734e-05	4.55641e-05	4.55641e-05	0.732816	0.461956	0.732816	0.559626	0.502897	0.461956	MPLHRLLAAVSARGFRRSLSTAAAATDSRRGASWTWYLLDKTTMAAGSAPAPEVSFDSPPSLSQLHVPEHLAKHSCGLPLPDPDDDVVRLLACKACCSSQDGLLLLNIHDIRVAATIVARQGAEQGGDRVRQFTGLADLSQLPGMSHYVFNPCNREISSCLPEIEGPKKILAGFNLGLLTRAGSGGFGPPDRYAVAEMEGRLMLRFLSETGEWEILEGSRCQLPAGRPRLLPNQEAVAWNGKLWWVDLTFGAICADPFSDRPEPRFVQLPSGSMLPAHIHEKGVDEVVRRALNFNLEGSILEPHMYRRVGVSGGWLRYVEVSHKEPFVLSSFKLDADGSGWTLEHRVALSKLWADGGHPWLP	135713	125811	92583.7	81593.1	108925	77584.4	73454.3	88261.7	79988.1	79822.1	67218.5	59898.2	55002.6	61710	60957.3	51209.6	58321.3	50445.7	59135.8	54778.1	53897	47025.7	53132.2	47219.5	50318.6
Bradi4g13640.3	9.17582e-08	1.21355e-06	0.0148165	3.03237e-06	1.45519e-08	1.69675e-08	1.45519e-08	0.781973	0.315385	0.781973	0.534474	0.369644	0.315385	MVFVKTQKTRAYSKRFQVKFKRRRQGKTDYRARLRLTNQDKNKYNTPKYRFVVRFTNKDVTAQIVYATIAGDIVMAAAYSHELPRYGLTVGLTNYAAAYCTGLLLARRILKYRELDQEYEGNVEATGEDYSVEPSDERRPFRALLDVGLIRTTTGNRVFGALKGALDGGLDIPHSDKRFAGFKKDEKQLDAEVHRKYIYGGHVADYMRSLADEEPEKFQSHFSEYIKKGISADDMEALYKKVHAAIRADPSMAKSTKEPPKTHKRYNLKKLTYDERKASLVQRLNALNASAGADVDDDEDDE	135632	187094	179186	145858	161943	114363	142762	123165	126248	126635	85957.3	89564	83621.2	87073.7	86554	78217.7	53063.5	55670.7	52492.2	59861	46665.5	34151.5	65439	58040.7	51074.2
Bradi4g13920.1	0.00467489	0.00812913	0.958685	0.00666181	0.013483	0.0416112	0.00666181	0.891629	0.213255	0.891629	0.213255	0.285412	0.405071	MYVTRRLSVYLADPSATAEPPPEGPGSGFLVVVDETGETARTRCWGMCVDREMRGLPFPQNRQLALRESSSSSPLESCATFIDFVGEIVGTCTGIQSGRAPGSKAPKVPDYAMLLPVVGQPLSSGRYYVVQVGGKHRGKVSACSKEDDKTTCCFGCSCVNDVKPRPLDRRDLYQQVEVQRLPSSSGFMAVAVAADGIPPHHLRKKGWKVNTMMSPRYDLTDALGVDSALRRRMPDLDDSLSVVVGRWYVPFMFVKADGERSLKEQSRRCTFYEMTMEQSWEQIYCRDDPAAEVAVTATVRRSTALLGGTGVQVQEGWPHADDDGGTVWFRPAAAAAAATVGLDVVLWERMRWEADKGGWVAPAGNGDEERIERVERHDDVAQLVGHGHKFRCYLLVERF…	371588	303549	341549	416629	358329	89523.8	151467	498978	538016	319496	80468.2	88625.6	54224.3	82344	76415.5	94221.1	114013	115611	85240	102271	153322	134334	173243	119695	145149
Bradi4g14500.1	0.00342155	0.00617894	0.108125	0.00354302	0.00202664	0.267882	0.00202664	0.801791	0.513248	0.74155	0.54639	0.513248	0.801791	MESKGCCSCKAKTEAPRPPTPHVAMLVTPGMGHLIPLAELAKRLAAHHGVTATLVTFASTASATQRAFLASLPPAITSLSLPPVDLSDLPQDAAIETLMSEECARSVPALTEILTELKSSKRLVAFVADLFGADSFDAAVAAGVPKRCLFFPTNLHGLTLILNLPKLHESIPGEFKDMAEPLRLPGCVPIPGPDVLSPLQDKSNPSYKWMVHHGARYREANASRQLFDAVEPDAAAALRAPEPGRPTVHNIGPLTQTREGSTVGGGPREACLEWLDRQPAKSVVFVSFGSGGALPAEQMRELALGLELSGQRFLWVVRSPSDEGAVNANYYDAESKKDPLAYLPEGFVERTKDTGLVIPSWAPQIKVLAHESTGGFLVHCGWNSVLESLVHGVPMVAWP…	35582.1	45015	47544.9	43241.1	42845.8	36327	35054.8	25031.3	30676	31772.3	27081.8	24257.3	22004	20298.9	23410.5	21640.2	15486.5	25797.5	25037.9	21990.5	42279.3	46392.1	28349.4	20392.7	34353.4
Bradi4g14950.1	8.21167e-07	6.71366e-06	0.00775723	2.89493e-06	1.84833e-06	5.96396e-07	5.96396e-07	0.834707	0.624251	0.834707	0.632973	0.624251	0.628127	MALNKEYTYADLEKEPYWPFEKLRISITGAGGFIASHIARRLKGEGHYIIASDWKKNEHMEEDMFCHEFHLADLRVMDNCLKVTTGVDHVFNLAADMGGMGFIQSNHSVIMYNNTMISFNMLEAARINGIKRFFYASSACIYPEFKQLETVVSLKEADAWPAEPQDAYGLEKLATEELCKHYTKDFGIECRVGRFHNIYGPYGTWKGGREKAPAAFCRKAQTSTDRFEMWGDGLQTRSFTFIDECVEGVLRLTKSDFREPVNIGSDEMVSMNEMAEIVLGFENKQLPIHHIPGPEGVRGRNSDNTLIKEKLGWAPTMRLKVPFQFSMTIFCSVKPPKHAHAQMLTAYQTELKFYLQDGLRITYFWIKEQLEKERAEGGDVSAYGSSKVCTTQAPVQLGS…	568705	740294	735895	698726	685905	566524	571254	564947	587393	572530	449660	460415	388407	438155	434160	440312	419059	422446	430889	428177	403608	393798	436130	489804	430835
Bradi4g15450.2	1.83792e-05	7.00382e-05	0.00362504	0.000734749	3.20399e-06	3.77136e-05	3.20399e-06	0.628941	0.308138	0.628941	0.555138	0.308138	0.388648	MVGLGAMPGYGIQSMLKEGHKHLSGLDEAVLKNIEACRELSAITRTSLGPNGMNKMVINHLDKLFITNDAATIVNELEVQHPAAKLLVLAARAQQAEIGDGANLTISFAGELLEKAEELIRMGLHPSEIIIGYNKAIIKVLEVLEDLVEKGSENMDVRNKEEVVLRMKSAVASKQFGQEDVLCSLVADACMQVCPKNPANFNVDNVRVAKLVGGGLHNSSVVRGMVLKNDAVGSIKKVEKAKVAVFAGGVDTAATETKGTVLIHSAEQLENYAKTEEAKVEELIKAVADSGAKVIVSGAAVGDMALHFCERYKLMVLKISSKFELRRFCRTTGAIALLKLSQPNADELGYADSVSVEEIGGARVTVVRNEEGGNSVATVLLRGSTDSILDDLERAVDDG…	21174.4	26176.7	31667.7	24466.2	25871.3	14253.8	21502.3	11665.8	17664.2	16271.5	12723.8	15041.5	14964.8	14718.5	14362.1	10106.8	7862.36	4576.12	9342.36	7971.92	6844.11	12455.4	13600.8	7318.94	10054.8
Bradi4g19457.1	4.44778e-06	2.3256e-05	0.00399497	3.61438e-07	0.00037985	4.17279e-06	3.61438e-07	0.770244	0.510762	0.770244	0.510762	0.70639	0.591796	MALSVEKTSSGREYKVKDLSQADFGRLELELAEVEMPGLMACRTEFGPSQPFKGARISGSLHMTIQTAVLIETLTALGAEGETLEEYWWCTERCLDWGVGGGPDLIVDDGGDATLLIHEGVKAEEEFEKSGKIPDPESTDNPEFKIVLTIIRDGLKTDARKYRKMKERLVGVSEETTTGVKRLYQMQESGTLLFPAINVNDSVTKSKFDNLYGCRHSLPDGLMRATDVMIAGKVAVVCGYGDVGKGCASALKQAGARVIVTEIDPICALQALMEGLQILTLEDVVSEADIFVTTTGNKDIIMVDHMRKMKNNAIVCNIGHFDNEIDMNGLETYPGVKRITIKPQTDRWVFPETNSGIIVLAEGRLMNLGCATGHPSFVMSCSFTNQVIAQLELWKERST…	1.49193e+06	1.76681e+06	2.03647e+06	1.74244e+06	1.75941e+06	1.2965e+06	1.25608e+06	1.39953e+06	1.4686e+06	1.35518e+06	940996	939033	764572	949961	898641	1.41277e+06	1.21494e+06	1.23495e+06	1.10866e+06	1.24283e+06	1.03967e+06	853985	1.17234e+06	1.09886e+06	1.04121e+06
Bradi4g19470.1	0.000128909	0.000354171	0.0090853	4.44513e-05	0.000722889	0.000211879	4.44513e-05	0.715038	0.503455	0.715038	0.503455	0.6137	0.56365	MCTRALLTSIAIYPRRSSYPHHSPSPLALQPRRRAISTCYTPAAAMDSVASWGLTPLADADPEIFDLVEREKRRQRSGIELIASENFTSFAVIEALGSALTNKYSEGMPGARYYGGNDVIDEIENLCRDRALAAFRLDAASWGVNVQPYSGSPANFAAYTALLNPHDRIMGLDLPSGGHLTHGYYTAGGKKISATSIYFESLPYKVSAANGYIDYDKLEEKAMDFRPKLIICGGSAYPRDWDYARLRAVADKVGAMLLCDMAHISGLVAAQEAANPFEFCDVVTTTTHKSLRGPRAGMIFYRKGPKPAKKGQPEGAVYDYEDKINFAVFPSLQGGPHNHQIAALAVALKQAVTPGFKAYAKQVKANAVATGNYLMSKGYKMVTDGTENHLVLWDLRPLG…	365260	599650	635346	587007	546816	354517	378059	401628	429771	390994	256807	273861	243722	326798	275297	341016	341043	334323	325941	335581	299513	271252	354823	307263	308213
Bradi4g19570.1	2.41369e-05	8.75286e-05	0.155157	0.440229	7.02953e-05	3.28711e-05	3.28711e-05	0.823931	0.205633	0.74067	0.823931	0.267541	0.205633	MAADPSAASAAADPDGPDAVRLTWNAWPRSKVEASRCVVPLAAAISPVRCPESLASPPLPYAPLRCKPPCSALLNPFARVDYAAKIWICPLCFSRNHFPPHYAGISESNVPAELFPQCSTVEYLVAGAPGGPAPGSPGPPPPVFLFVIDTCVIEEELEYVKMSMRKAVALLPEHALVGLVTFGTQVHLHELGFSDLSKIYVFRGTKEISKDQILDQLGLAGAGRPGFPKMPQQPGVQQVNGMHPSATAGVNRFLLPVSECECTLSTLLDELQPDQWPVETGHRAIRCTGVALSVAAGLLGACMPGTGARIIALLGGPCTEGPGVIVSKDLSEPVRSHKDLDKDAAPHFQKAVKFYDGLAKQLVSQGHVLDVFASALDQVGLAEMKLAIERTGGLVVLSE…	23194	34218.9	38416.7	23494.5	29831	25711.6	21324.3	14803.9	26539.9	22094.9	22130.9	25408.9	27475.2	23299.8	24578.7	9086.2	3581.95	7887.63	11368.3	7981.02	7086.4	2026.86	13604.1	1819.55	6134.23
Bradi4g20150.1	0.0147156	0.0220817	0.979161	0.0642996	0.0265385	0.0283339	0.0265385	0.870426	0.0618596	0.870426	0.204696	0.0618596	0.0742074	MAAACFLHPKIADPGLLRVAIWPPPACSAQEQKELRGQGRHAQAPSSFACIEAHAALREPPPHPPRLCIPNLKLLNLALRTRWGWLCRADPTRPWVEFNIQIPEQARALCEAAIEVARGNGEALHFWYDPWLPEGRSLADLAPMLLSEISGWASRLSVAEALHANGWLRAIHPELSFQALVDLQVVHDRVAEVILSDDDDRFRWK	3131.5	3199.62	1662.13	3367.22	2840.12	293.164	420.659	3498.86	5675.78	2472.12	313.398	423.626	762.561	825.862	581.362	0	0	148.215	554.541	175.689	308.921	0	534.111	0	210.758
Bradi4g21690.1	0.000675537	0.00149639	0.0825362	0.999953	0.0188904	0.341766	0.0188904	1.33861	0.555626	1.33861	0.988036	0.555626	0.778106	MADAGAAPAAAKARRLAPPMSWRARLSILAAGYLTDATRRADGTINRRLLTFLDPGVPASAAPRNGVASRDIDLHAGHGPLPLRARLFFPAGAHASPGPRPLPVVVFFHGGGFAYLSAASPAYDAACRRIARHCAAAVLSVDYRRSPEHKFPAPYDDGFSALRFLDNPKNHPADIPQLDVSRCFLAGDSAGANIAHHVARRYAMALSSFSHLRILGLISIQPFFGGEERTASELELDGAPIVSVSRCDWMWRAFLPPGADRTHEACAAAGAAAAAGVESAAFPPAVVVVGGYDPLQDWQRRYCEALRAMGKEVRVLEYPEAIHAFYVFPEFAESRDLMLRIKEIVAGSGGGGRK	81819.4	99161.1	134008	182906	124473	156062	187820	161341	161262	166621	112504	148935	126030	104469	122984	63749.7	62738.8	73986.3	76167.9	69160.7	107312	116458	81756.9	81887.2	96853.5
Bradi4g21890.1	0.0043952	0.00771018	0.00433501	0.0054504	0.00345287	0.0641201	0.00345287	0.519533	0.242901	0.268273	0.28685	0.242901	0.519533	MAEAILMAVTKIGSVLTEEATKAVIAKLSEKVTNLKELPVKIEQIRKQLTMMGNVISKIGTVYLTDEVVKSWIGEVRNVAYHVEDVMDKYSYHVLQIKEEGFLKKYFIKGTHYAKVFSEIADEVVEVEKEIQEVVRMKDQWLQPCQLVANPLTEMERQRSQDSFPEFVKDEDLVGIKDNRILLTGWLYSEEPEGTVITVSGMGGLGKSTLVTNVYEREKINFPAHAWIVVSQIYTVEDLLRKLLWKIGYTEQPLSAGIDKMDVHDLKKEIQPRLQNKKYLIVLDDVWEPEVYFQIHDVFHNLQGSRIIITTRKDHVAGISSSTRHLELQPLSNRDAFDLFCRRAFYNKKGHMCPKELDAIATSIVDRCHGLPLAIVTIGSMLSSRQQLDFWKQTYNQLQ…	42660.2	20441.4	22481.9	12056.9	24410.1	7769.11	4829.49	4695.59	8900.08	6548.57	5963.46	3589.31	9314.74	9140.64	7002.04	7664.61	2581.9	7469.87	6000.59	5929.24	15394.2	8215.89	10058.7	17058.6	12681.9
Bradi4g22250.1	0.00916116	0.0144882	0.319662	0.104686	0.00306151	0.0186613	0.00306151	0.791597	0.477586	0.791597	0.707128	0.477586	0.593599	MQNRAMANKLMILLVSLALVLAAAAATTTHLRFYMHDIVTASPPSYPAATALRAVKGMTPLPNDPTNRFGDTYVIDDSLTEGPEGDSRLVGRAQGYYMFASMTEASLLLSANMVFTAAAGKNYNGSAVAVLARDSILDTVRELPVVGGTGAFRGATGYGLLRTHSFNASSNNAVLQIDMYVQV	94860.1	73227	139228	142627	112485	67944.4	92994.8	100449	94784.7	89043.2	86884.2	89770.2	66778.6	74733.6	79541.6	65189.9	62764.6	49355.8	37575.4	53721.4	91174.9	70718.1	57718.5	47473.2	66771.2
Bradi4g23180.1	3.35307e-07	3.23092e-06	0.0550552	0.000300219	2.15112e-08	3.04602e-07	2.15112e-08	0.819364	0.348929	0.819364	0.645924	0.348929	0.422817	MAICNKAWISLLLALAVVLAAPAARAEEAAAAEEAAPAAGEEAVLTLGTDNFDDAIAKHPFIVVEFYAPWCGHCKSLAPEYEKAAQLLSKHDPPIVLAKVDANDEKNKPLAAKYEIQGFPTLKIFRNQGKNIQEYKGPREAEGIVDYLKKQVGPASKEIKAPEDASHLEDGKIHIVGVFAELSGPEFTNFLEVAEKLRSDYDFGHTVHANHLPRGETAVERPLVRLFKPFDELVVDTKNFEVSALEAFIEASSTPKVVTFDKNPDNHPYLLKFFQGNSAKVMLFLNFSTGPYESFKSAYYGAVEDFKDKEVKYLIGDIEASQGALQYFGLNADQAPLILIQDAESKKFLNSNIEADQIVSWLKEYFDGKLTPFRKSEPIPEANNEPVKVVVADNLDDVV…	408488	452015	388488	313845	390709	294878	275272	338041	372339	320133	228777	224497	260966	295234	252368	144809	102715	153787	144007	136330	171591	149270	174145	165788	165198
Bradi4g23450.1	5.77264e-06	2.81365e-05	2.99629e-06	6.14336e-05	0.000191018	2.8867e-06	2.8867e-06	0.490279	0.320521	0.320521	0.409304	0.490279	0.338646	MLAVCARHGPAKLPPPPLAGERVAWVSGRWWWWRPAAARRGVAVRAPSFNSRIGLDSQNSNTRDLSQLLWVGPVPGDIAEIEAYCRIFRAAEQLQNAVMSALCDPETGECPVRYDVPSEDLPVLEDKVAAVLGCMLALLNRGRTEVLSGRSGVASAFQGSEHSTMDRIPPLALFRGDMKRCCESMQVALASYLVPNEARGLDIWMRLQRLKNACYDAGFARADGHPCPTLFANLFPVYFSTVPDDSGTDELEVAFWRGGQISEEGLAWLLAKGFRTIVDLREEDVKDDLYLSAVQEAVSSGKVEVVNMPVEIGTAPSAEQVQQFAALVSDGAKKPIYLHSKEGVGRTSAMVSRWKQYATRAERLATQNRSPNVNGKALKKHGAEQHTSSPGSSSNGSEN…	430530	782773	768077	753300	683670	184664	229670	212229	249959	219131	283674	267031	353499	215112	279829	373289	389942	299908	277616	335189	224994	230213	238271	232612	231522
Bradi4g24110.1	0.000583018	0.0013152	0.596944	0.816824	0.000251663	0.0376158	0.000251663	0.937557	0.597111	0.912102	0.937557	0.597111	0.78585	MAAKALLLVLFTAATLLSPTPATAADSDGLTKFKVYFHDVLSGKSPTAIRIAQSPTTNSSSTFFGAMVAIDDPLTTTPAATGSPAKSKDEVGRAQGSYTFADQTTFGLLMSMNFVFTAGDHKGSSLAIYGRNEVLSTVREMSVVGGTGKFRMARGYVEARTVDSGNTSGETVVEYTVFVKTAAGGAA	332343	345863	473105	452226	400884	337441	380654	370851	373643	365647	403726	425226	331518	342938	375852	279561	239691	217969	220268	239372	337880	286753	321051	314454	315035
Bradi4g24610.1	8.5488e-08	1.17677e-06	0.00481012	0.000151935	8.30249e-10	7.58094e-07	8.30249e-10	0.729758	0.254314	0.729758	0.615452	0.254314	0.316378	MSHRKFEHPRHGSLGFLPRKRCSRHRGKVKAFPRDDPQKKCHLTAFLGYKAGMTHIVREVEKPGSKLHKKETCEAVTIVETPPIVIVGLVAYVKTPRGLRTLNSVWAQHLSEDVRRRFYKNWCKSKKKAFTKYALKYDSDAGKKEIQLQLEKMKKYASVVRVIAHTQIRKMKGLKQKKAHLMEIQVNGGTIADKVDYGYNFFEKEVPIDAVFQKDEMIDIIGVTKGKGYEGVVTRWGVTRLPRKTHRGLRKVACIGAWHPARVSYTVARAGQNGYHHRTEMNKKVYKIGKAGQETHDASTEFDRTEKDITPMGGFPHYGIVKGDYLMIKGCCVGPKKRVVTLRQSLLKQTSRLALEDIKLKFIDTSSKFGHGRFQTTEEKQRFYNKLKA	13266	15569.4	17343.7	15758.9	15484.5	9329.2	9717.89	11597.7	14554.9	11299.9	9540.46	10398	9226.5	8954.87	9529.96	5238.37	4813.55	3224.25	2475.54	3937.93	3954.39	5532.7	5783.61	4325.13	4898.96
Bradi4g25120.1	0.00015346	0.000412386	0.00275366	0.389673	0.077167	0.96093	0.00275366	1.24419	0.589053	0.589053	0.851366	1.24419	0.950481	MHDPNSESPIYSRHPNKSQSSAKPPHSSSSLSHTHTAQQKQSTLPILAALLPTLLLPHARKSRDLYPSSSSAAAAMGKDCGNHGEDDLRRTCRRLAAFILLLALVVAIIALIVYLVLRPTHPRFFLQDASLRQLDLPQNSSNSGAGGVLSTTLQVTIASRNPNDRVGVYYDRLDVYASYKYQQITLAASLPQVYQGHGDVDVWSPVLSGPGIPFAPYLATSLAGDVQAGYLVLQVKIDGRVRWKVGSWISGHYHIFVTCPAFLVGAGGNGAPGASGLRFQTATYCRVEV	11178.2	10852.4	14696.7	15373.7	13025.2	7134.77	10102.1	6621.6	6831.76	7672.56	9744.58	13443.1	11150.3	10019	11089.2	17589.5	14430.8	18143.4	14660	16205.9	13109.2	10983.9	13672.3	11755.6	12380.2
Bradi4g26140.1	1.66196e-06	1.12662e-05	0.00262525	2.88482e-05	1.84795e-07	1.26286e-06	1.84795e-07	0.737177	0.46709	0.737177	0.573292	0.46709	0.495328	MSAVLTRPAPGTVQCFGRKKTAVAVAYCKPGRGLIKVNGAPIELIRPEMLRLKAFEPILLAGRSRFKDIDMRIRVRGGGKTSQIYAIRQAIAKGLVAYFQKYVDEAAKKEVKEIFGRYDRTLLVADPRRCEPKKFGGRGARARFQKSYR	188216	222580	226085	189181	206515	116881	150806	170522	170745	152238	120253	130858	101194	121269	118394	112078	108957	81051.9	83758	96461.2	89348.9	97684	118067	104071	102293
Bradi4g26700.1	1.90913e-05	7.21407e-05	0.0645959	0.00101062	7.61317e-06	1.32127e-05	7.61317e-06	0.704766	0.217682	0.704766	0.468472	0.217682	0.233219	MARTSSQSQSSVAGAGGAGSRPATAGPRGTPAATAGMRRRPGRASSSSSSGAGGGFSGGNNMLRFYTDEAPGLRLSPTMVLVMSLCFIGFVTALHVFGKLYRSRTAASSASA	10385	8755.17	7905.02	6339.13	8346.09	3704.91	5255.56	8069.77	6497.92	5882.04	4558.66	2903.57	3214.03	4963.36	3909.91	2824.58	821.04	1350.22	2271.32	1816.79	3149.65	898.79	1538.32	2199.12	1946.47
Bradi4g27530.1	0.000308779	0.000757351	0.0375291	0.00259178	0.00120864	6.1569e-05	6.1569e-05	0.785745	0.551649	0.785745	0.685081	0.653946	0.551649	MTLGSSGAGSSVVVPRNFRLLEELERGEKGIGDGTVSYGMDDADDIYMRSWTGTIIGPHNTVHEGRIYQLKLFCDKDYPEKAPSVRFHSRINMTCVNHETGAVDPKKFGVLANWQRDYTMEHVLSQLKKDMSAQQNRKLVQPPEGTFF	15525.3	19465.7	17244.6	18413.6	17662.3	14584.6	10847.3	14825.8	15254.7	13878.1	12085.3	11337	11232.6	13745.6	12100.1	12272.5	13226.6	7715.35	12986.4	11550.2	8984.71	10729.6	11247.5	8011.78	9743.4
Bradi4g28070.1	2.18741e-05	8.10664e-05	0.00263535	5.48869e-06	3.39069e-05	9.2913e-05	5.48869e-06	0.626931	0.371221	0.626931	0.371221	0.405952	0.486143	MTRANGNGTVPVRDNRRSMQHAEGPAAVLAIGTANPTSTIAQQDQFADQFFRVTNSDDLTDLKAKFERICDKTGIEKRHFHMTEEMLLAHPEFLDRDQPSLDARIEIVATAVPKLAESAARKAIAEWGRPASDITHLIFSTYSGCRAPAADLELATLLNLRPTVCRTILSLHGCYGGGRALHLAKELAENNRGARVLVACSEITLVCFNGPDGSNLVGHALFGDGAGAAIVGAGPFDAASGERPLFEMVAATQTTVPKTEHVLGMQVAGGGIDFHLAIQVPMLIGQNVEQCLRDAFRATLGDDDEDGIPCWNDLFWAVHPGGRPILDNIDAVLKLEKGKLAASRQVLREYGNMSGATIVFVLDELRRRREKDGSGGHQLPEWGALLAFGPGITIETMVL…	54681.6	47476.8	36909.7	32788.3	42964.1	33871.5	25741.7	27286.1	20842.7	26935.5	18623.9	13527.2	13665.6	17980	15949.2	19072.2	15960.2	17898.9	16834	17441.3	22775.2	23048.1	17079.9	20643.5	20886.7
Bradi4g29440.1	8.46442e-07	6.87862e-06	0.156853	2.1109e-05	3.26207e-05	6.93453e-08	6.93453e-08	0.864677	0.411237	0.864677	0.560243	0.583354	0.411237	MAAAPPPKADELQPHPPKEQLPGVSFCITSPPPWPEAVILGFQHFIVMLGTTVIIPSALVPQMGGGNEEKARVIQTLLFVAGINTLLQTFFGSCLPVVMGGSYTFVAPTISIILAGRYNDEADPRQKFLRTMRGTQGALIIASTIQIILGFSGLWRNVVRLLSPLSAVPLVSLVGFGLYELGFPAVAKCVEVGLPELILMVAFSQYLPHVVHSGKNLFGRFAVLFTVSIVWLYAYILTISGAYKNARPKTQVHCRVDRSGLIAGAEWISVPYPFQWGAPTFDAGEAFAMMMTSFIALVESTGAFIAASRYASATMIPPSIVSRGVGWQGIGILLDSFFGTANGTSVSVENVGLLAVTHVGSRRVVQISAGFMIFFAVLGKFGALFASIPLPIFAGMYCV…	30196.6	30999.1	28952.6	25886.5	29008.7	26935.3	26275.1	23689.4	23432.8	25083.1	14360.9	14630.8	18532.1	17484	16251.9	18812.8	20881.7	13081.4	14913.5	16922.3	15944.9	8785.78	12697	10290.2	11929.5
Bradi4g29770.1	0.000358771	0.000862713	0.0172026	0.184331	0.00048054	0.000264408	0.000264408	0.778479	0.39454	0.637824	0.778479	0.444322	0.39454	MEQGKAALGWAARDASGHLSPYNFSRRVQKDDDVTIKVLFCGICHTDLHIIKNEWGNALYPIVPGHEVVGVVTDVGPGVKNFKAGETVGVGYFLDSCRTCDSCSKGHENYCPTLVLTSNGVDYDGATTQGGFSDVVVVNQDYVVRVPDTLPPDGAAPLLCAGVTVYSPMMQYGLNAPGKHLGVVGLGGLGHMAVKFGKAFGMKVTVISSSLRKREEALDRLGADDFLVSSDAEQMKAAAGAMDGIIDTVSAGHPIVPLLELLRPMGQMVVCGAPSEPLQLPAYAVITGGKRIAGNGVGSVRDCQAMLDFAGEHGITADVEVVKMDYVNTAVERLERNDVRYRFVIDVAGSLQQGGAA	36484.3	72128.9	80333.2	59748	62173.6	40282.1	47287.7	28994.7	42058.8	39655.8	47805.1	46926.6	46140	52731.7	48400.8	32048.1	27652.1	27696	23104.2	27625.1	21220.9	24427.2	31719.9	20751.8	24529.9
Bradi4g30540.1	0.0143851	0.0217307	0.0508416	0.0142331	0.114556	0.991196	0.0142331	0.943935	0.434548	0.543553	0.434548	0.617099	0.943935	MEAGAGLVAGSHNRNELVLIRGHEDHKPVRALSGQVCEICGDEVGRTADGDQLFVACNECGFPVCRPCYEYERREGTQNCPQCKTRYKRLKGSPRVEGDDDEEDIDDIEHEFNIDDDDKQRAIQLHNNSHITEAMLHGRMSYGRASEDGGEGNNTPLVPPIITGNRSMPVSGEFPMSASHGHGDFSSSLHKRIHPYPMSEPGSAKWDEKKEVSWKERMDDWKSKQGILGTADPDDMDADVPINDEARQPLSRKVSIASSKVNPYRMVIILRLIVLCVFLRYRILNPVPEAIPLWLTSIICEIWFAVSWILDQFPKWYPIDRETYLDRLSLRYEREGEPSLLSPVDLFVSTVDPLKEPPLVTANTVLSILAVDYPVDKVSCYVSDDGASMLSFESLSETA…	9591.92	4080.26	6817.9	7106.84	6899.23	3457.28	4287.75	3342.54	3912.83	3750.1	2738.47	1808.52	3349.05	4096.15	2998.05	4450.34	4906.15	5171.53	2502	4257.51	9054.71	8071.53	4460.48	4462.97	6512.42
Bradi4g31150.2	2.49411e-09	8.62705e-08	0.690506	5.97473e-06	2.56613e-11	4.72998e-09	2.56613e-11	1.03903	0.562045	1.03903	0.735988	0.562045	0.633001	MGNLCCCVQVDQSTVAIREQFGRFDSVLEPGCHCLPWMIGKRIVGHLTLRLQQLDVRCETKTKDNVFVTVVASIQYRPLAGKESDAFYKLTNTRSQIQAYVFDVIRASVPKLNLDDAFEQKNDIAKAVEDELEKAMSAYGFEIVQTLIVDIEPDEHVKRAMNEINAAARMRVAANEKAEAEKIVQIKRAEGEAEAKYLSGLGIARQRQAIVDGLRDSVLGFSVNVPGTTAKDVMDMVLITQYFDTMKEIGASSKSSAVFIPHGPGAVRDIATQIRDGLLQGQSAAHQ	2.19188e+06	1.92864e+06	2.02941e+06	2.176e+06	2.08148e+06	2.27245e+06	2.0698e+06	2.23319e+06	2.07544e+06	2.16272e+06	1.47409e+06	1.63851e+06	1.50609e+06	1.50911e+06	1.53195e+06	1.21529e+06	1.35972e+06	1.12482e+06	979724	1.16989e+06	1.33238e+06	1.25072e+06	1.39176e+06	1.29546e+06	1.31758e+06
Bradi4g31310.1	2.69296e-06	1.65128e-05	0.00179424	3.25299e-05	4.0495e-06	1.15691e-05	4.0495e-06	0.646631	0.341001	0.646631	0.383438	0.341001	0.434433	MASFAHKEHQFLAELGLSPRNPGSFACGAWGGSGPVITTTNPTNNQVIAEVVEASVDDYEKGMNACFDAAKTWMAIPAPKRGEIVRQIGDALRAKLDHLGRLLSLEMGKILPEGIGEVQEIIDMCDYAVGLSRQLNGSIIPSERPNHMMMEVWNPLGVVGVITAFNFPCAVLGWNACIALVCGNCVVWKGAPTTPLITIAMTKIVASVFEKNNLPSAIFTAFCGGAEIGQAIALDRRIPLVSFTGSSKVGQMVQQQVNARFGKCLLELSGNNAIIIMDDADIPLAVRSVLFAAVGTAGQRCTTCRRLVCFFMKAYIKQFLINLLRFINKYALGILWRKGTLLGPLHTTASKESFLKGIQIIKSQGGKILLGGSAIESEGNFVQPTIVEISPSAPVVREE…	53087.4	81192.6	79140.8	78261.9	72920.7	40053.5	43808.4	58487	46262	47152.7	29741.6	35068.4	27075.2	19956.9	27960.5	26070.2	24160.1	17869.4	31364.6	24866.1	25488.3	29507.6	35033.8	36687	31679.2
Bradi4g31330.1	3.72693e-06	2.07753e-05	0.00246372	2.53037e-05	1.53966e-06	2.95471e-05	1.53966e-06	0.570109	0.18569	0.570109	0.322118	0.18569	0.231002	MMHMTFYWGTSATILFDGWRTSAWPGYLLSLLALFLAAAFYQYLEAFRIRVKLLAGAKAEPLPPPAGSDAARAPLLAPAAALAGGRWPARVATAALFGVNAGIGYLLMLAIMSFNGGVFIAVVLGLAAGYLAFRSSDGEDLVVVDNPCACA	257301	302263	370483	292101	305537	91703.8	119221	224628	261205	174189	91011.4	100072	86845.3	115746	98418.9	83286.4	55862.1	46080.5	41711	56735	65159.5	64508.9	82817.7	69832.6	70579.7
Bradi4g31540.1	1.58821e-05	6.26462e-05	0.689856	0.0111625	4.07164e-05	7.07661e-05	4.07164e-05	0.872593	0.183332	0.872593	0.571736	0.183332	0.253369	MSLLRRRKQQQPPPPSPGDDSNGSDHDEKDKGDKGKKPAQPSSSSSAPPSKEAGRRVKAKWSCVDSCCWLVGCVCSAWWLLLFLYNAMPASFPQYVTEAITGPLPDPPGVKMQKEGLHAKHPVVFVPGIVTGGLELWEGHQCAEGLFRKRLWGGTFGDVYKRPLCWVEHMSLDNETGLDKPGVRVRPVTGLVAADYFVPGYFVWAVLIANLARIGYEEKNMYMAAYDWRLSFQNTEVRDQTLSRIKSNIELLVATNGGNRVVVIPHSMGVLYFLHFMKWVEAPPPMGGGGGPDWCAKHIKTVANIGGPFLGVPKAVAGLFSSEAKDVAVARAIAPEVLDSDFLGLQTLRHLMRMTRTWDSTMSMIPKGGDTIWGGLDWSPEDGFECKAKKQKTNDSEVS…	20296.4	21123.1	18430.1	17402	19312.9	11699.9	23272.3	11587.7	20849.3	16852.3	10487.5	12760.7	8526.87	12392.5	11041.9	2834.54	5017.79	2547.68	3762.69	3540.68	9832.83	3237.86	3429.06	3073.43	4893.3
Bradi4g31680.1	0.00408759	0.00720805	0.64295	0.0245627	0.99881	0.00500639	0.00500639	0.98075	0.622605	0.891833	0.698637	0.98075	0.622605	MDLPAPPTNYPKTLSSIILSRRRPDAERRPPGARINKCASQRLVSPPPLPLHHSLLLRPDPPGRERSVVVRSSTVAAPQLVPPMTTPSPNPTIRRLDVASPVPADIDIANAVDPLPIADIAAELGIPPEHYDLYGKYKAKVLLSVLDELKGQQDGYYVVVGGITPTPLGEGKSTTTVGLCQALGAFLDKKVVTCVRQPSQGPTFGIKGGAAGGGYSQVIPMDEFNLHMTGDIHAITAANNLLAAAIDTRIFHEASQSDKALFNRLCPPNKEGKRRFADVMLRRLIKLGISKTDPNELTAEEVRRFARLDIDPASITWRRVMDVNDRFLRKISVGQGPEEKGMVRETGFDISVASEIMAVLALTTSLADMRERLGRMVIGNSKSGEPVTADDLGLGGALT…	43627.9	42499.7	44718.9	40410.7	42814.3	34572.2	38600.6	41359.3	38200.7	38183.2	28749.2	35448.2	26116	29333.2	29911.6	43749.4	55149.7	40159.6	28901.6	41990.1	34080.2	22004.2	23077.7	27463.4	26656.4
Bradi4g33090.1	0.0160702	0.0238228	0.0241031	0.0117123	0.0322343	0.0118402	0.0117123	0.481141	0.391442	0.454253	0.391442	0.481141	0.39197	MERLFATEIIGGRALYKLHAVTVAVGICLVLYYRATRVPEQGQGRAAWLGMLAAELCYAAYWVVTQSVRWCPVRRIPFRDRLAARYGERLPCVDIFVCTADPHSEPPSLVISTVLSLMAYNYPTEKISVYLSDDGGSILTFYALWEASLFAKHWLPFCKRYNIEPRSPAAYFSESDGHQDLCTTKEWSLIKDMYEEMTERIDTVVESGKIAEEIKEKHKGFGEWSPEITSKNHQPIVQILVNSKDGNAVDNDGNVLPTLVYMAREKRPQHHHNFKAGAMNALIRVSSVISNSPIIMNVDCDMYSNSSDTITDALCFFLDEEMGHKIGFVQYPQNYNNMTKNNIYGNSLQVINKVELNGLDSVGGPLYIGTGCFHRREILCGRKFTEDYREDWNGGIKDK…	86451.9	64064.8	39332	23291.5	53285	28293	17889.6	23122.1	27514.9	24204.9	18285.8	14145.7	26505	24495.5	20858	23664.6	23338.1	26503.5	29044.3	25637.6	23125.8	11054	25387.8	23977.1	20886.2
Bradi4g33490.1	0.00486231	0.00835574	0.28062	0.048635	0.00129236	0.0223437	0.00129236	0.802916	0.480136	0.802916	0.69011	0.480136	0.644125	MIPPKDLDQGRRSRANSVVMELKGAIFTTAVLATLLCSPALAQKSPPAPASVALPPTMAPAPAPAPDYVDLAALLGVAGPFHTFLSYLQKTNVIETFQRQANKTKEGITIFVPKDSAFAALKKSTFSNLTSDQLKMLLMYHALPEFYSLAQFRNLSVLNPVNTFAGAPYTLNLTDDMGTISVKSMWSKPTISSSVYATDPVAIYSLNKVLLPMQIFTKDPPLAPAPAPAPESGASDLAPSPGGKAGAGKGKADSTSAGYGLGVGAVNCLLAAGGLMMFLW	125149	70362.6	91904	68738.4	89038.5	89030	69888.3	56019.1	71024.5	71490.5	74448.8	52153.8	60274.9	58907.9	61446.3	50179.5	45881.9	34458.9	40481.9	42750.5	59360.8	55369.3	55263.7	59413.9	57351.9
Bradi4g34420.1	9.75789e-06	4.24505e-05	0.0141847	0.692615	0.00137109	0.0143214	0.00137109	1.38042	0.493247	1.38042	0.883399	0.493247	0.621111	MDARRRLCLVAAVLLAAAAAAEGYNITKILGEHPEYSQFNKLLTQTRLAADINKRRTITVLVVANGDMGALAAGRTLQTIRHILQMHVLVDYYGAKKLHQLAHGVTASSSMFQESGAAPGMSGYVNITQHRGGHVTFTAEDASDSASPVSFVKSVKEIPYDLSVLQISKVLSSPEAEAPVAAPAPVNITELLSKKYCKSFAGLLAADADAFSTVNATKDNGLTLFCPVDAAVASFMPKYKNLTAKAKTAILLYHAVPDYYSLQLLTSNSGKVSTLATSSVAKKDYSFDVSKDGETAALDTKVITASVTATVKDDDPLAVYAVSKFLQPKELFKVAKDLAPAPAPEGPKKKSSKKKPSAASSPSDDDDDSAADSPDDDSGSDVDAADKAGAAPPMLARWV…	287912	287002	341332	332808	312263	335798	397435	488479	502505	431054	236959	247669	273447	345337	275853	118717	120704	185373	191299	154023	237108	148076	202806	187811	193950
Bradi4g34750.1	1.13957e-07	1.46408e-06	0.0059373	1.06207e-05	4.19014e-10	2.60527e-08	4.19014e-10	0.711972	0.199407	0.711972	0.450945	0.199407	0.293059	MAPKRGGRAPVPAKKKAEKVTNPLFEKRPKQFGIGGALPPKKDLHRFVKWPKVVRIQRQRRILKQRLKVPPALHQFTRTLDKNLATNLFKMLLKYRPEDKAAKKERLLKRAQAETEGKTVEAKKPIVVKYGLNHVTYLIEQGKAQLVVIAHDVDPIELVVWLPALCRKMEVPYCIVKGKSRLGSIVHKKTSSVLCLTTVKNEDKLDFSKILEAIKANFNDKFDEVRKKWGGGVMGSKSQAKTKARERLIAKEAAQRMT	199072	252905	286768	235220	243492	124165	194830	188777	185665	173359	125367	121227	79113.8	113497	109801	67216	59675.2	37925.4	29399.1	48553.9	66760.5	59823.9	88614.4	70231	71357.4
Bradi4g34980.1	0.000422069	0.000991935	0.0734426	0.62038	0.00282873	0.025308	0.00282873	1.09373	0.659745	0.79348	1.09373	0.659745	0.748091	MAENPQLYGNGMPVPFHGEMFVLARDGVEFHVDKIPSAPGGHAKTKGTIYLSNIRMVFVASKPVGNFFAFDMPLLYVHGEKFNQPIFQCNNVSGFVEPVVPDSQNRALYSTHTFKILFKEGGCGTFVPLFLNLITSVRRYNQFEAQSAAAPRMDPLQAAQTPVDEMMRHAYVDPNDPTKIFLQQPAPESQLRRRNYNAPADNAY	28856.6	29150.7	26813.8	27578.1	28099.8	21635	24272.5	16563.1	26715.9	22296.6	27652.5	30477	30401.6	34403.6	30733.7	21208.8	19223.2	18967.8	14755	18538.7	23749.6	15788.3	25033.9	19513	21021.2
Bradi4g36440.1	0.000202177	0.000520491	0.283908	0.00116065	0.000251422	0.000514	0.000251422	0.789721	0.343346	0.789721	0.445002	0.343346	0.389088	MARYDRAITVFSPDGHLFQVEYALEAVRKGNAAVGVRGTDTVVLGVEKKSTPKLQDSRSVRKIASLDTHIALACAGLKADARVLINRARVECQSHRLTVEDPVTVEYITRYIAGLQQKYTQSGGVRPFGLSTLIVGFDPYTDKPALYQTDPSGTFSAWKANATGRNSNSMREFLEKNYKDTSGKETIKLTIRALLEVVESGGKNIEIAVMTKKDGLRQLEETEIDEYVAEIEAEKAAAEAAKKSGPKDT	5478.58	6221.73	4480.54	3196.22	4844.27	4450.32	3202.73	3466.42	4183.01	3825.62	2400.11	2475.75	1660.42	2086.56	2155.71	2477.01	1839.09	1105.6	1231.34	1663.26	2401.5	996.746	1228.05	2913.1	1884.85
Bradi4g36620.1	0.00430224	0.00757667	0.722755	0.301297	0.0193474	0.0873129	0.0193474	1.11935	0.612675	1.11935	0.795443	0.612675	0.706985	MAATAILLLLFAAAAPRLSGATEYTVGDSDGWTIGPSYLAWSQKYNFTAGDTLVFNYVPRQHDVREVTQDAYRTCEPAANQTVRAWASGRDLVDLAAPGDYYFVCNVTGHCLGGMKFSVAVAAPSPPPPPPPRAFPTPAPPPPSSSSVQFNCNSRLLKEIVVSSGRAIEEQSIIDKVAKRLAGWQGRLLSTAGKLVLNSVLSALPNFQMVAMAQPVWALKQIDKLRQAFLWTVSDSCSGARCLVAWSKVCVPKSLGGLGIPNLAMHGRALRVRWLWKCWGRADPERFNMFSNDPTTLALFHVGTRFVIGNGARCSFWHDPWLSSCTLKSQFSQLYAFSSCTKTSLREALVEQRWVAATRREPGPRVLAEFVDLWIRLRDVHLSDETDMILWKFNMSGTY…	4404.32	4539.45	2886.65	2985.94	3704.09	4934.86	3159.51	4321.43	4168.96	4146.19	2445.61	3886.95	2875.58	2577.42	2946.39	1768.28	2650.97	2158.54	2499.82	2269.4	2981.1	2709.4	2435.37	2349.08	2618.74
Bradi4g37090.1	6.42095e-05	0.000200506	0.398938	0.175684	0.00120181	0.38364	0.00120181	1.15083	0.542431	1.14802	0.799575	0.542431	1.15083	MAQLTILALLCVSLAALSLSPSPVTAARFACNATAPRASTCQALISYAPPNSTASMTLAGVRALFQLRSHRALLASNNLPLSTPPTAPAPTPLRIRLPCLCSGGAGATFQRPTYRVRAGDTLDAVARSVFAGLVTYRDIAAANNVSDPSKVAVGQELRIPLPCSCDPVDGVPVVHYTYVVPAGSSVAGIAQEYGATEAAILALNRMPDAKSLLAGQVLDVPLRGCSSAISNTAIDRNLIVPNSSYIFTANNCIVCGCSSTTWQLDCQATTGIGPSFCPVAKCGDAFLGNITTSTAPACETTMCSYAGYTNSTSFAIHANLTTTSVCNAAGVSPAAQPSHSSASGLASTARWRWSELIACLHVLLSLCLWVSAP	89852.3	89392.7	114140	115361	102186	109949	122279	125762	111256	117312	71713.8	76787	79768	98554.1	81705.7	36560.6	36121.4	80495.7	68538.6	55429.1	131795	110347	115364	112891	117599
Bradi4g37350.1	3.41193e-06	1.9339e-05	0.00180997	6.08273e-06	0.000112312	6.12611e-07	6.12611e-07	0.756208	0.547508	0.756208	0.570366	0.638417	0.547508	MAATAVAAAADTKIEKLREAVAKLDEISENEKAGFISLVSRYLSGDADQIEWSKIQTPTDEVVVPYDTLAPAPEDLDATKALLDKLVVLKLNGGLGTTMGCTGPKSVIEVRNGFTFLDLIVIQIESLNKKYGCNVPLLLMNSFNTHDDTQKIVEKYSNSNIDIHIFNQSQYPRIVTEDFLPLPSKGQTGKDGWYPPGHGDVFPALNNSGKLDTLLAQGKEYVFVANADNLGAVVDIKILNHLIHNQNEYCMEVTPKTLADVKGGTLISYEGRVQLLEIAQVPDEHVNEFKSIEKFKIFNTNNLWVNLKAVKRLVEADKLKMEIIPNPKEVDGVKVLQLETAAGAAIRFFEKAIGANVPRSRFLPVKATSDLLLVQSDLYTLVDGYVIRNPARVKPSNPS…	1.05797e+06	1.35063e+06	1.42679e+06	1.24943e+06	1.2712e+06	851526	887725	1.03811e+06	1.06782e+06	961295	806141	733615	609745	750709	725053	900579	822003	788120	735532	811558	685030	675952	696542	726456	695995
Bradi4g38430.1	4.33842e-05	0.000145224	0.0046728	1.48268e-05	0.00285815	5.55053e-05	1.48268e-05	0.719077	0.489745	0.719077	0.489745	0.702649	0.563433	MASEKHFKYVIVGGGVSAGYAAREFAKQGVQPGDLAIISKEAVAPYERPALSKAYLFPQNPARLPGFHVCVGSGGERLLPEWYSEKGIELILGTEIIKADLASKTLTSAAGATFTYEILLIATGSSVIKLSDFGTQGADSNNILYLREVDDADKLYAAIQAKKGGKAVVVGGGYIGLELSAVLKMNDLDVTMVYPEPWCMPRLFTADIAAFYESYYANKGVKIVKGTVAVGFDADANGDVTAVKLKDGRVLEADIVVVGVGGRPLTTLFKGQVAEEKGGIKTDASFETSVPGVYAVGDVATFPMKIYNDVRRVEHVDHARKSAEQAVKAIKGKESGEAVPEYDYLPYFYSRSFDLSWQFYGDNVGETVLFGDSDPSSAKPKFGSYWIKDGKVLGAFLEG…	603294	662619	628997	454577	587372	442422	365105	442385	439550	422366	304962	278565	239950	327175	287663	493995	395629	402086	359156	412717	345339	251106	340593	386742	330945
Bradi4g38510.1	0.000246074	0.000619317	0.0457758	0.00222701	0.000111458	0.000489097	0.000111458	0.667482	0.28971	0.667482	0.484485	0.28971	0.39262	MSKLQTEALKEAITQVVTEAKEKNRKFTETVELQIGLKNYDPQKDKRFSGSVKLPHVPRPKMRVCMLGDAQHVGEAEKIGLDSMDVEALKKMNKNKKLVKRLAKKYHAFLASEAIIKQIPRLLGPGLNKAGKFPTLVSHQESLEAKVNETKATIKFQLKKVLCMGVAVGNLSMEEKQIQQNIQMSVNFLVSLLKKNWQNVRCLYIKSTMGKPVRVF	56701.3	88109.9	105830	65039.6	78920.2	46270.9	62032.5	35733.6	66674.3	52677.8	36887.6	39498.8	32240.5	44315.8	38235.7	22298	31027.3	16969.2	21161.3	22863.9	28092.8	18485.6	46236.4	31127.7	30985.6
Bradi4g38860.1	2.12089e-08	3.97372e-07	0.000226939	4.29338e-09	1.23189e-10	1.03513e-07	1.23189e-10	0.619254	0.203032	0.619254	0.244647	0.203032	0.281051	MGSRYEVELTVGSAKDLKNVNWRNGDLKPYAVLWIDGGAKCSTRVDLDNGENPAWDEKVVVPLPPTSRIQDAVLYIDVVHANAAEGTKPLVGSARLPLRDVVDDAGIGGRASRNLRLKRPSGRPQGRLDVRVAVKEPSRYYDPNPGYPAPAGYPASRDPYAAPAPPSGGYGGYGGGAPPQPYAAAPPSGYPAYGAAPPQPAYGAAPPAYGAAYGSAPQPAYGAAAAPAAYGATSTAADPNKKKGMGMGTGIAVGAAAGVLGGLALAGGASYVENKFEERVAEKVEEDSYGGGYGDYGGDDDY	75104.6	74377.1	57623.9	56171.7	65819.3	39133.9	35757.7	47120.9	41023.1	40758.9	18109.2	13923.9	11572.5	20804.4	16102.5	17223.4	11167.4	13964.5	11098.5	13363.4	22119	11137.1	26693.8	14044.5	18498.6
Bradi4g39810.1	0.00316128	0.00577854	0.0119647	0.00280072	0.00240351	0.00425859	0.00240351	0.258043	0.0886432	0.258043	0.108587	0.0886432	0.147919	MTKFEYDHRLVLLPCHLLLCLSVICSCSAEAPAAAGHRPGCPAKCGDVDIPFPFGIGEQCALDGFQLGCNRSIGSRGTGSTSSKPFWGDFEVMSISVPDGKVRVKTLISSLCYDPATNLTTPFEASSDFTNSGFWISDADNKIVVIGCYTLAYMMSSSYVIGCLSRCDDALPLQNGSCSGNGCCQADVPKDITYYESYFNERYNGSVTWRQQDRRCGYMAVMEKAALDFRPSFVTSTVFNDTNNGKVPVILNWLIAQVSCRVARQNMSTYACVSSNSQCLDSTGKQPGYRCRCRNGYEGNPYITGGCQDIDDCLGNSNLCPFGVCVNTPGGYNCPCHPGNSTINGVCVPIQKPSRFPALPVVGASVGLVIIVIAIACACLIRERKKSQKMKENYFRQHG…	55414.7	20076.8	20205.1	15468.9	27791.3	8293.78	4262.17	7114.04	9015.41	7171.35	1559.31	2253.69	3114.48	5143.65	3017.78	4758.86	1566.47	1880.85	1647.88	2463.51	4181.04	3851.24	6151.65	2259.59	4110.88
Bradi4g39920.1	3.2996e-06	1.89547e-05	0.054866	0.710955	0.000396758	0.00919535	0.000396758	1.62794	0.559596	1.32857	0.876331	1.62794	0.559596	MANFQITPRSALVEGKELNFSNLFLFHTPIGSSPNQSAITEANATTGLGRTVVHNWLIYDGPGSNATLVARAQGLHTYAGNWQNSFSIVFEVERFKGSTLQVMGISVEEGEWAIVGGTGQFAMANGVIYKRFHEQRSDGNTIELTAHGFCPMLKGAPSLLTKLGPWGGNGGTEEDTTEAAPKGLESITVFSGDVVDSIGFSYVDQAGKKHTAGPWGGPGGSPRQIQLAPSEYVKEVSGTFGDYYGVNVITSLTFVTSLKTHGPFGQEDGTPFTVPVQKNSGIVGFHARGGKFLDAIGVYVRPL	238819	403004	415511	386775	361027	544879	526586	506201	340940	479652	289780	343462	295966	336310	316379	551731	659117	536033	604045	587731	217762	186416	197742	206197	202029
Bradi4g39970.1	0.00955656	0.0149731	0.120541	0.00437695	0.00732648	0.0981401	0.00437695	0.731899	0.528011	0.731899	0.528011	0.559538	0.718346	MAADQARSNRRVVLKRYVTGFPTEDDMELVVAAAGAVTLAVPPGSRSVLVKNLYLSCDPYMRGRMSKHDDGSYVQDFVPGEVLTTFGVSKVVASGHPDLKEGDLVWGMTGCEEYTLITNPESLFKINHPELPLSYYTGVLGMPGLTAYFGFFEISKPKKGEYVLVSAASGAVGQLVGQLAKITGCYVVGSAGSDEKVNLLKSKFGFDEAFNYKKEQDLNAALKRCFPEGIDIYFENVGGAMLDAVLLNMRNHGRIAACGMISQYNLEQQEGVRNLLCVVAKRIRMEGFIIMDHFGAYGKFEEEMVGHIKEGKIAYVEDVVEGLEKLPEALIGLFHGRNVGKQLVAVARE	9592.68	8226.46	6771.9	6408.56	7749.9	7197.38	5804.27	4731.85	4955.07	5672.14	3731.11	4778.26	2033.67	5825.09	4092.03	4235.99	5369.45	3725.35	4014.68	4336.36	7393.14	3930.53	5460.04	5484.74	5567.11
Bradi4g40150.1	0.000911523	0.0019395	0.8778	0.0536268	0.00142734	0.00190116	0.00142734	0.907761	0.428427	0.907761	0.657661	0.428427	0.446594	MDASSVALFNQLKAAQPFFLLAGPNVIESEEHVMKMAKHIKAITTKVGVPLVFKSSFDKANRTSSKSFRGPGLEEGLKILEKVKAAYDLPVVTDVHESYQCEAVGRVADIIQIPAFLCRQTDLLVAAAKTGKIINIKKGQFCAPSVMANSAEKIRLAGNQNVMVCERGTMFGYNDLIVDPRNFEWLREANCPVVADVTHALQQPAGKKLDGGGVASGGLRELIPCIARTSVAVGVDGIFMEVHDDPVNSPCDGPTQWPLRNLEELLEELIEIAHVTKGKKPFKIDLTPFHE	50635.8	88095.9	79374.1	70488.3	72148.5	56806.8	69964.8	57452.2	77750.6	65493.6	46551.9	57967.5	60313.2	24964.6	47449.3	42044.8	17041.4	19812.3	44743	30910.4	29655.7	31927.9	30418.5	36882.2	32221.1
Bradi4g40160.1	0.0191722	0.027691	0.0382719	0.0529021	0.0267451	0.00703628	0.00703628	0.509572	0.323028	0.479758	0.509572	0.445923	0.323028	MELSPWLFMFSVLVKASVIMADTNGQDTAGLIGIAASWNTHPSNWVGNDPCGEKWIGISCTGDRKTVRNSSRGEAWDSFRGHSIFVRIAALGLIPEQEPRRFSSFIHWNLEQPPKLVPFIEQYHSFNADIYLNSNRFTGPIPSSLGRLSKLYWLDLGENMLTGGLPIFDGTNPGLDNLTNTKHFHFGVNQLSGTIPRQIFNSNMKLIHLLLDNNNFSGSMPPTLGLLNTLEVLRFDKNSQLSGAVPTNINNLTKLAELHLENNQLTGPLPDLTGMSSLSFVDMSNNSFNASDAPSWFTALPSLTSLYLENLGIGGQLPQALFSLSAIQTLRLRGNRFNGTLNIGSGFGTQLQKIDLQDNQIAQITVTGTPYDKQLILSGNPICEQGSSEKYCKTTGQSN…	64084.6	46740	34562.1	16323.6	40427.6	21510.5	14991.6	11312.9	29766.8	19395.4	19469.5	15492	16612.7	30828.9	20600.8	17921.8	14333.7	23136.9	16718	18027.6	12654.7	10307.9	16395.7	12878.6	13059.2
Bradi4g41290.3	0.0316053	0.0430227	0.328734	0.58024	0.0266003	0.0208175	0.0208175	0.795785	0.461929	0.722519	0.795785	0.482473	0.461929	MGTMRQGQRNRFNVACDATNMGKNRYIDVLPYDDNRVRLKLSTSQISSNDYINASFIKATEDNRSTRFISTQGPLVKTFEDFWEMVCENQCRVIVMLTQFDSVKCDEYLPLLNGQDVYGKYNVEITKKRYCHQLWLRDVKVQCNESDKIHSVLHIEYPDWPDHGVPTSTDAVRQIRKRLHNVREEHPIVVHCSAGIGRTGAYITIHSTIERILLGDTSSYDLVETVKKFRSQRNGMVQTEDQYMFCFRAIVDELKDLLKSNH	11238.6	21534.3	13008.7	26878.4	18165	11785.8	18575.4	10459	11678.1	13124.6	14359.7	12254.6	17068.8	14138.6	14455.4	5766.32	5636.75	13566.6	10086.8	8764.12	12259.7	8926.3	6958.26	5419.45	8390.94
Bradi4g41680.1	7.30395e-10	3.77689e-08	6.86529e-05	6.44583e-08	6.20463e-11	1.73271e-10	6.20463e-11	0.674413	0.203689	0.674413	0.461883	0.203689	0.261968	MSHRKFEHPRHGSLGFLPRKRCSRHRGKVKAFPRDDQQKSCHLTAFLGYKAGMTHIVREVEKPGSKLHKKETCEAVTIIETPPIVIVGLVAYVKTPRGLRTLNSVWAQHLSEDVRRRFYKNWCKSKKKAFTKYALKYDTDAGKKEIQLQLEKMKKYASVVRVIAHTQIRKMKGLKQKKAHLMEIQINGGTIADKVDYGYKFFEKEVPVEAVFQKDEMIDIIGVTKGKGYEGVVTRWGVTRLPRKTHRGLRKVACIGAWHPARVSYTVARAGQNGYHHRTEMNKKVYKIGKVGQETHDASTEFDRTEKDITPMGGFPHYGVVKGDYLMIKGCCVGPKKRVVTLRQSLLKQTSRLALENITLKFVDTSSKFGHGRFQTTDEKQRFYGRRKA	49786.1	61170.8	54682.5	48217.6	53464.3	28589.7	39291.3	39049.7	37297.3	36057	28436.8	25174.6	19206.3	25959.2	24694.2	10758.2	11217.5	10841.8	10742.7	10890.1	12430.3	15865.7	14802.6	12925.1	14006
Bradi4g42890.1	5.46141e-09	1.51115e-07	2.86026e-08	6.66142e-11	1.81469e-10	1.65303e-10	6.66142e-11	0.172445	0.000121148	0.172445	0.0173107	0.000121148	0.00695722	MLAVFSGEVVEVPAELVAAGSRTPSPKTRASELVKRFLAAPGADPAVSVDLGSLGNLAYSHANQSLLLPRSFAAKDEIFCLFEGVLDNLGRLSQQYGLSKGGNEVVLVIEAYKTLRDRAPYPASFMLSQLTGSYAFVLFDKSTSSLLVASDPEGKVPLFWGITADGCVAFSDDIDLLKGSCGKSLAPFPQGCFYWNALGGLKSYENPKNKVTAVPANEEEICGATFMVEGSSTVLTAPLQ	26932.2	49677.3	39670.9	43710.7	39997.8	8002.74	4387.45	10241.8	4957.58	6897.4	1582.78	1057.65	129.12	0	692.387	0	0	19.3826	0	4.84566	1043.95	0	69.1396	0	278.273
Bradi4g43670.1	2.93585e-07	2.95556e-06	0.305592	2.67613e-05	0.00140009	0.522061	2.67613e-05	1.5978	0.570348	0.841579	1.5978	0.570348	0.878291	MTSTPPARDLDPAAPPTRDLAGLALGAERSRRPRPRHGAHAATPSGQSPDRRGSSSSSSSTCKDFLRKFVDNELLTASLEDWFSGNSQDCGFRKPSFEVPFDLTELQSFDYALEGVTFQQLVRMPNALHASTSDVFEATAHLALEDFLHAGIKGLWEAFWGPEEAMPFSVACIHSTSSRFYPAEKAISSGKLDGVCATAVLLKNSKHSQGRWDHIVVLALLRPDIGMVSAQNDQRPSPAVLGEALFFALRVLLSRSLSRSSTVLRNSDSVYVLLVDSQFGGVVNVQGDLNKLNFDSNNVYECAAEWIKKEAKITVSSVDRVWNKLGNANWGDVGTLQVLLAVFHSMIQFCGAPKYSLDELATEHSSRLQCRRSERHLVDRQSNNGNGLFRFQQRSHSPE…	19984.7	14489	17072.2	18680.6	17556.6	18335.5	14897.4	12394.3	13474.1	14775.3	26358.3	25332.4	30544.9	29972.3	28052	10472.2	8911.36	13287.4	7382.56	10013.4	15542.9	13482.8	16164	16489.6	15419.8
Bradi4g45310.1	1.20598e-10	1.07617e-08	0.972047	1.21732e-11	0.000392139	0.0266447	1.21732e-11	2.15759	0.536473	0.959049	2.15759	0.536473	0.727782	MASKGGGGGGHEEDEPQRPKQQLPRDSRGSLEVFNPSSADSSTAFRPAAAAAAKSSPFGTRDKDKEEDVGKATKRAAEWGLVLQTDEQTGRPQGVSARASGSARSSSDDGKPGGGAIPRVSEELRAALSAFQQTFVVSDATKPGHPIMYASAGFFNMTGYTSKEVVGRNCRFLQGSGTDPAEIAKIRQALADGSNYCGRVLNYKKDGTPFWNLLTIAPIKDEDGRVLKFIGMQVEVSKYTEGSKDAVVRPNGLPESLIKYDARQKDQARSSVSELLLALKNPRSLSESSNSTFKRKSQESVGALTGDGTGKRSSESGSRRTSRSGARSSLQKISEVPEGGNKARKSGLFSLMGLLGMGQGNVEKNMLKPRDEDPLLDSDDERPESFDDELRRKEMRRGI…	300926	265587	315566	259839	285480	254054	337873	221159	282071	273789	587103	561443	653333	661909	615947	158101	184060	137618	132828	153152	200974	224144	220580	185369	207767
Bradi4g45360.1	1.56035e-06	1.06848e-05	0.806354	0.952303	0.000424303	3.26227e-05	3.26227e-05	1.06922	0.463644	1.06922	1.04341	0.571923	0.463644	MTSKYTGVVDEGNYSYEEEMVNNARGMKLFTCRWLPPKSQPVKALVFICHGYAVECSVTMRGTGVRLAQAGYAVYGVDYEGHGKSEGLQGYVPSFDLLVNDCDAFFAAAVASTPNTDLPRFLLGESMGGAVALLLHRARPSYWSGAVLVAPMCKIADEMKPHPVVVSVLRAMTSIIPTWRIVPTADVIDAAYRVQEKRDEIRANPYCYNAKPRLKTAYELLRISLHVENNILKKVSLPFLIVHGGDDKVTDPSVSDLLYRSAVSQDKKLNLYPAMWHALTSGETVDNINVVFKDIIAWLDQRSGASPAPTTSSSEMEQKSKHDHDQHQQDLNVVAKQ	23461.2	22844	26153.7	26175.5	24658.6	26903.7	28768	21278.4	28511.2	26365.3	25633.6	28609.2	23048.2	25625.5	25729.1	13465.7	8818.68	15489.6	18637.2	14102.8	11584.8	10755.3	9897.7	13493.4	11432.8
Bradi5g02030.1	0.00129478	0.00264492	0.847927	0.00395889	0.0689321	0.00124416	0.00124416	0.846831	0.103837	0.846831	0.221265	0.499869	0.103837	MASSSPLPRWAPTPSPSRPLWLTTAPSTDAATVDPCCGGCLSASVFFAPLPVGGSPENNAVAATVVDGVDTNKPSCPAVFLTWEDLSVTAVNGGSSSDKGRDALILDGLSGQARPGELLALMGPSGSGKTTLLDALAGRLGPNMERRGDILINGVRDKLAFGTSAYVTQENVLMATMTVAEAVHYSAQLQLPDSMSPAEKQARAEDAIQNMGLAGVAGTRIGGRVCKGISGGQRKRVSICMELLSSPVLVFLDEPTSGLDSAASYHVMSRIARIAERNRMTVVAAVHQPSTEVFELFHGLCLLAKGRTVYFGPASKAIEFFDDNGFPCPLRMNPSDHFLRMINTDFEESEEGSTINLPHAAQVIQILISSSSSLGTLKTKMETTKTLTQSASVKKKKQA…	46511.6	33722.3	50980.4	28428.8	39910.8	15438.7	15158.7	44920.2	59673.2	33797.7	6952.34	10105.3	8742.42	9523.33	8830.85	18512.2	18636.6	21665.2	20986.7	19950.2	5077.98	3195.27	4311.51	3992.16	4144.23
Bradi5g02170.1	4.42787e-06	2.3242e-05	0.00975152	0.00274444	5.83811e-07	5.1439e-06	5.83811e-07	0.677237	0.270977	0.677237	0.619948	0.270977	0.312139	MGSDNVGPRDVCVVGVARTPMGGFLGALSSLPATKLGSIAIEAALKRAHVDPSLVQEVYFGNVLSANLGQAPARQAALGARIPNTVVCTTVNKVCASGMKATMFAAQSILLGSNDIVVAGGMESMSNAPKYIGEARKGSRFGHDSLIDGMLKDGLWDVYGDCAMGVCAELCADNHALTREDQDAYAIQSNERGIAARDSGAFAWEIAPIEVPGGRGKPPVIVDKDESLDKFDPAKLRKLRPSFKENAGTVTAGNASSISDGAAALVLVSGQKAQELGLQVLARIKGFADAAQAPELFTTTPALAIPKALSNAGLESSSVDFYEINEAFSAVALANQKLLGIPSEKINVHGGAVSLGHPLGCSGARILVTLIGVLREKGGKIGVAGVCNGGGGASALVLE…	41884	61770.7	55133.4	53585.8	53093.5	21686	40440.6	38095.5	43605.4	35956.9	27135.5	34892.5	29051.4	40581.4	32915.2	11141.6	11804.4	17647.3	16955.1	14387.1	15610.9	13049	22920.6	14709.7	16572.6
Bradi5g07880.1	0.00039061	0.000929336	0.0737962	0.000107781	0.00368667	0.192646	0.000107781	0.850026	0.550846	0.809129	0.550846	0.693919	0.850026	MAARSPYFAPEEAARGIRAGESPAAALRRILATPGAHQAPCCFDALGARLVERAGFPICFMGGFCVSAARLGLPDVGLISYGEMIDQGRLITEAVSVPVIGDGDNGYGNSMNIKRTIKGYINAGMAGIMLEDQVAPKACGHTEGRKVISREESVMHIKAAIDARKDSASDIVIVARTDSRQAVSLDEALWRVQAFADAGADVLFIDALASVEEMKAFCAIAPGVPKMANMLEGGGKTPILTPAELQEIGFSLVVYPLSLIGVSMRAMEDALLAIKGGGIPPAGSMPSFQEIKDTLGFNRYYEEDKQYSVPQTQSTFPSGNA	105503	145276	148438	118743	129490	105890	111274	101632	100300	104774	75306.2	73228.9	62594.4	74186.9	71329.1	104699	86147.5	83150.8	85425.6	89855.6	83516.5	109177	127612	119974	110070
Bradi5g08870.1	0.00391014	0.00694049	0.0208644	0.00205198	0.0170143	0.00255034	0.00205198	0.745042	0.654931	0.745042	0.654931	0.736391	0.660767	MTALKLPKNFISSFDKIRRHFLWGVDDDATAGGKCKINWIKVCSPLDFGGLGLANLSSFGRALRLRWLWLEWRAPERPSVGTATPCDEIDRDLFAAATRVSVGDGKMAIFWHSNWIGGLPLRLTFPLLFARSRRKSWSVADALRGHLWIRDLRHDRSEVFLLEFVLAWRELAMVTLQPDAPDSIKWILTTAAPTLRAPPTSSNSRVASPRQCPRQSGAFGLRRRPSSSPG	14383	15141.7	16471.4	14204.6	15050.1	11271	11974.1	10332.4	11274.4	11213	10631	9606.55	9902.74	9286.91	9856.81	15111.3	9664.18	11045.5	8510.16	11082.8	9634.35	7443.86	12599.8	10100.5	9944.63
Bradi5g09217.1	4.04659e-06	2.19523e-05	0.020348	7.16125e-05	3.4982e-06	4.08778e-06	3.4982e-06	0.717726	0.330728	0.717726	0.394569	0.341621	0.330728	MKFIAAYLLAYLSGNSSPSAEDLTTILESVGCEIDNEKMELMLSQVKGKDIAELLAAGREKFASVPSGGGGVAVAAAAPASGGGGAAPAAEKKEEKVVEKEESDDDMGFSLFD	38670.7	49486.4	45560.4	29915.7	40908.3	23096.4	33279.7	35891	25176.8	29361	17891.2	15966.5	12463.2	18243.8	16141.2	16391.1	11538.4	14158.7	13812.3	13975.1	14308.9	9183.68	16358.7	14266.9	13529.5
Bradi5g10177.1	0.000158516	0.000425124	0.999758	0.444419	0.00535294	0.00020425	0.00020425	0.985794	0.404495	0.985794	0.846543	0.58281	0.404495	MGKEQRQESPPMLLVVALAAVFLCSCPAAVSARKVGETCALGRNCDAGLHCETCVADGNVRPRCTRVTPVDPQTKDRGLPFNRYSWLTTHNSFARLGTRSQTGTAIATAWNQQDTVTQQLNNGVRGLMLDMYDFRNDIWLCHSYGGACQNFTAFTPAVDVLREIEAFLAANPSEVVTIFIEDYVESPRGLTRVFNASGLTRYLFPAWRMPKNGGDWPLLGDMVRDNHRLLVFTSRSAKEASEGFAHEWRYVVENQYGSKGMVKGSCPNRAESAAMSDLSRSLVLVNYFRDLPNFPEACKDNSAQLLAMLDACHAAAGNRWANFVAVDFYKRSDGGGAAEATDKANGGLVCGCGSIAACNVNGTCTPSRHRATPKGIFNKTSDAASWRPPAMLLPAALIV…	11480.2	11998.7	8481.93	11017.1	10744.5	8307.41	12643.8	9709.28	11706.9	10591.8	7849.38	11762.8	7265.88	9504.52	9095.66	7253.03	4011.09	7518.01	6265.83	6261.99	4621.86	3686.42	5295.49	3780.6	4346.09
Bradi5g10380.1	0.000459573	0.0010634	0.91911	0.190054	0.000681708	0.00180673	0.000681708	0.921768	0.393953	0.921768	0.754399	0.393953	0.457076	MATTLPPLPLLCLLPLLLVAFATAGGGSGGGGGENFPRDGRVIDLDDSNFEAALSSIDFLFVDFYAPWCGHCKRLAPELDEAAPVLAGLSEPIMVAKVNADKYRKLGSKYGVDGFPTLMLFIHGVPIEYTGSRKADLLVRNLKKFVAPDVSILESDSAIKSFVENAGTSFPMFIGFGVNESLITEYGGKYKKRAWFAIAQDFSEELMMAYGFDKAPALVALHPKYNEQSVFYGPFEGRFLEDFIRQSLLPLTVPINTETLKLLDDDDRKVVLAILEDDSDENSAQLVTVLRSAANANRDLVFGYVGVKQWEEFVETFDVSKSSQLPKLLVWDRNEEYEQVDGSERLEEGDQASQISQFLEGYRAGRTTKKKVSGPSFMGFMHSLVSMNSLYILMFVVAL…	26182.7	40944.9	51911.7	31015.2	37513.6	29898.6	43063.2	27986.9	37366.7	34578.8	24044.1	29003.6	30529.9	29623.2	28300.2	10581.9	17287.6	15884.8	15360.1	14778.6	18989.6	17313.8	21371.9	10911.1	17146.6
Bradi5g11120.1	3.48166e-08	5.65875e-07	5.65563e-05	9.97654e-08	4.48277e-09	1.86703e-11	1.86703e-11	0.69041	0.42267	0.69041	0.552867	0.465336	0.42267	MEREIGAAEYEVTEIDDTLLGSVGSRLSLFAREFKSRSSSSALRLPNNCYGTSFVIDPDGRWYRIWANMMFLWSIYSVFFTPLAFCFFRGLPEQLLDLECVQLVFLADVAIHFFLAYRDPHTHRIVHNKRRIALRYIKGNFALDMLGCFPWDAIYKFTGRIELVRYLVWLRLYRARKIQDFFKKMEKDIRISYLFTRIAKLITVELYCTHTAACVFYYLATTLPPAREGSTWIGSLAMGDHSYINFREIDLLTRYITSLYLAIVTMATVGYGDIHAVNTREMVFIVVYVSFSMLLGAYLIGNMTALIVKGCRTERFRDKMTELIRYMNRNRLGSDIRSQVKAHLLLQYESSYTRDRIVDDIPVAVRSNTLYLDMVSKVHLFKGCSEDFLSQIVVKLHEE…	355347	333448	347315	272979	327272	210149	215177	222394	256089	225952	189003	194921	157042	182786	180938	171097	130662	152625	154782	152291	141807	117876	150303	143326	138328
Bradi5g11340.1	5.13814e-06	2.58632e-05	0.991867	0.262043	9.97067e-05	1.84042e-05	1.84042e-05	1.04175	0.171627	1.04175	0.771608	0.239029	0.171627	MDGDHAPPPLSERDGSFNYDIESMDGGGWRGAAAAGRFGSSEALLRYDDGEGPREPLLRKRTMNTTSQIAIVGANVFPIESLDYEIVENDLFKQDWRSRKKKQIFQYIVLKWALVLLIGVLTGLVGFFNNLAVENIAGFKLLLTGDLMLQERYFTAFLAYGGCNLVLGATAAAICAYIAPAAAGSGIPEVKAYLNGVDAYSILAPSTLFVKIFGSILGVSGGFVLGKEGPMVHTGACIANLLGQGGSRKYHLTCNWLKYFKNDRDRRDLITCGAAAGVAAAFRAPVGGVLFALEEAASWWRSALLWRTFFTTAVVAVVLKALIEICRSGKCGLFGQGGLIMFDLSSNIPTYGTQDVIAIMVLGIIGGVFGGLFNFLLDRILRVYSIINEKGPPFKILLT…	21151.9	36448.2	34500.3	26808.3	29727.2	35515.5	31952.2	23997.2	32407.7	30968.1	22856.1	29857.8	16806.1	22231	22937.7	15247.6	6417.36	3718.55	3039.11	7105.66	3554.81	1697.83	8922.85	6232.44	5101.98
Bradi5g12070.1	7.55644e-05	0.000228046	0.0484482	0.166244	0.000301387	2.48408e-05	2.48408e-05	0.86736	0.590283	0.823775	0.86736	0.649326	0.590283	MAGGAFAVGDGAPSVHYGGGITFSVVVTCLMAASGGLIFGYDIGISGGVTAMESFLEEFFPGVLRRMAAARRDQYCVYNSHVLTAFTSCLYLAGLVASLAAGRVTRAVGRQAVMLAGGAFFLAGAAMNAAAVNIAMLIVGRMLLGFGIGFTNQAAPVYLAETAPAKWRGAFTTGFQLFLGIGNLAANLTNYGAARIPRWGWRLSLGLAAVPACVILVGALLIPDTPSSLIVRGHVEQARAALRRVRGPKSDVDAELEDVARAVDAARVHEQGAFRRILRREHRPHLVMAVAVPLFQQLTGVIVIAFFSPVLFQTAGFGSNAALMGAVILGAVNLGSALVSVATVDRYGRRPLFLAGGLVMIMCQVAVAWIMGSQIGRDGESTMARKYSVAVLALTCVFS…	82048.1	67562.4	86193.6	77128.4	78233.1	58792.9	57407.9	74903	66682.4	64446.5	71948.8	65868.7	69100.9	64506.8	67856.3	49666.5	59642.6	47945.5	45940.7	50798.8	58406.7	46144.2	40051.1	40116.7	46179.7
Bradi5g12227.1	0.000299862	0.000736819	0.158341	0.024327	5.53436e-05	0.00616147	5.53436e-05	0.854408	0.566709	0.854408	0.784863	0.566709	0.736546	MVASADVLRLRLRRWWWAAAVFSVVLGVSQVAANTEGDALYSLRQSLKDANSVLQSWDPTLVNPCTWFHVTCNTDNSVIRVDLGNAQLSGALVSQLGQLKNLQYLELYSNNISGTIPYELGNLTNLVSLDLYLNNFTGVIPDTLGQLLKLRFLRLNNNSLSGQIPNSLTKITTLQVLDLSNNNLSGEVPSTGSFQLFTPISFANNLNLCGPATTKPCPGAPPFSPPPPFNPPATPVAQGDSKTGAIAGGVAAGAALIFAVPAIGFALWRRRKPEDHFFDVPAEEDPEVHLGQLKRFSLRELQVASDNFSNKNILGRGGFGKVYKGRLTDGTLVAVKRLKEERTPGGELQFQTEVEMISMAVHRNLLRLRGFCMTPTERLLVYPYMANGSVASRLRERQP…	165285	142994	188275	159837	164098	152075	140874	136302	131576	140207	136633	123793	126970	127781	128794	117262	76218.6	96728.5	81773.7	92995.8	144830	94854.1	133466	110313	120866
Bradi5g12540.1	0.000499945	0.00114894	0.512626	0.994103	0.000492081	0.011583	0.000492081	0.971459	0.517343	0.875257	0.971459	0.517343	0.669923	MPPPLATVLTLLLALSVGAARGADDLASDTAALLAFLAPFGSASVSWNTSQPTCAWTGIICSGGRVTQLHLPGDGLRGSFPAGALGRLNKLAVLSLRYNALSGPIPADLASCVLLRVINLQSNHLSGELPAAVLSLPALTQLNLAENRFSGKIPPTIANNGKLQLLYLDGNLFTSELPDVTMPFLTALNVSFNNLTGEIPKSFGAMPAASFLGMPRLCGNPLPSCQTPSSQPPSTAPGLPPPEATGATNSPGRGRRHLAGGAIAGIVIGSASGLLLLAAVLVLVCGAMRSSEARRTHRSQDAVAAELALHSKEAMSPNGYTPRVSNARPPPPPVAAPMPPPVAPVAVGRKKLFFFGRVPRPYDLEDLLRASAEVLGKGTYGTTYKAALDSAPAVAVKRL…	91950.4	90872.8	135577	120938	109834	89467.3	98542.3	92626.4	103897	96133.2	86717.7	102539	114796	122745	106700	45846.6	53518	65906.8	62016.6	56822	74217.5	62740.1	95101.2	62263.4	73580.6
Bradi5g14170.1	0.0210993	0.0299611	0.496283	1	0.0705027	0.0264089	0.0264089	1.00039	0.485712	0.775201	1.00039	0.571978	0.485712	MRWWESVKSYAGNLGCVPRIGRKEPEDLYSYPIDPPEKRRGSRGLAAAAEEDPADRTIEVPAVALREVNEITGGFDGEKLIGQGSYAKVYKVTLRSARLAVVKKLEKPSKHASNDVFLRQLAVASKLRHEHFVRLLGYTVSGDLRVLVYEFASMGTLHDALHGPARGEEQEEGVQEGEDQRPVLSWAHRVQIALDAARGLEYLHEKARPAVTHKDVRSTNVLLFDGMRAKIADYNMFSQAADMARLNRSTHTLGSFGYQAPEYAMTGQMTDKSDVYSFGIVLLELLTGRKPLDRTLPQGQRSLVNWASPLLTEDRAQECIDPRLGDQYPPTGALKLGRIAVQCLQYDPTFRPSMGTIARVINYAVVRDQQGVV	2488.21	2045.51	1481.5	1326.44	1835.41	2158.63	1132.54	1018.55	1381.54	1422.81	2054.69	1312.95	1867.65	2109.26	1836.14	464.568	1249	1295.9	1189.81	1049.82	1337.46	590.562	980.577	657.332	891.483
Bradi5g14687.1	0.00729747	0.0118717	0.0115554	0.00875158	0.00381739	0.0742402	0.00381739	0.794002	0.669106	0.715133	0.702997	0.669106	0.794002	MTTDQPVISLRPGGGGGGPRASRLFSPAFATAASGSGDFLRPHGGAASGVSRIGDSHFETRERIRYSRDQLLELREIADVPEDISRIKQEIEAELQGLLQVDDQSWVRNDSIVPAQTQTQTQTQAQAQNRYTETDNRDWRTRTVQPPPVHEEKSWDNIRENKELYNSSGRQQEQFNRQDQLSSQFVSKAQVGPPPALIKAEVPWSARRGNLTEKDRVLKTVKGILNKLTPEKFDLLKGQLLESGITTADILKDVISLIFEKAVFEPTFCQMYAQLCSELNDNLPSFPPEESGGKEITFKRVLLNNCQEAFEGADSLRVEIARLIEPDQEMERRDKERIFKLRTLGNIRLIGELLKQKMVPEKIVHHIVKELLGSDKKACPDEEHVEAICQFFNTIGKQL…	8402.06	9042.69	9398.51	6145.9	8247.29	6287.98	5673.64	5357.47	6272.54	5897.91	5758.77	4937.52	6029.93	6465.04	5797.82	6046.26	6378.61	4254.08	5394.28	5518.31	6895.95	7052.04	5116.4	7129.06	6548.36
Bradi5g15970.1	7.88361e-09	1.89911e-07	9.39961e-05	0.0085193	4.64409e-11	8.51524e-11	4.64409e-11	0.858613	0.527737	0.765342	0.858613	0.533371	0.527737	MAKDIEAAPGEYAAKDYSDPPPAPLFDAEELTKWSLYRAAIAEFVATLLFLYITVATVIGYKHQADASASGADAACGGVGILGIAWAFGGMIFVLVYCTAGVSGGHINPAVTFGLFLARKVSLVRAVLYMVAQCLGAICGVGLVKGFQSAYFVRYGGGANGLSAGYSKGTGLAAEIIGTFVLVYTVFSATDPKRSARDSHVPVLAPLPIGFAVFMVHLATIPITGTGINPARSLGAAVIYNNDKAWDDQWIFWVGPFIGAAIAAAYHQYVLRASATKLGSSASFGRN	1.82188e+06	1.64051e+06	1.9202e+06	1.85025e+06	1.80821e+06	1.3753e+06	1.49189e+06	1.25587e+06	1.41254e+06	1.3839e+06	1.47663e+06	1.57823e+06	1.42591e+06	1.72945e+06	1.55255e+06	968397	1.01268e+06	921235	955479	964448	967033	883802	1.0636e+06	902607	954260
Bradi5g16170.1	0.000143472	0.000387863	0.0544263	3.34353e-05	0.000841064	0.000989556	3.34353e-05	0.690969	0.267092	0.690969	0.267092	0.444733	0.464342	MAPRTTEEDGSAGDEESPVEASTLRHRHNTGKNGAGEDDEGKRNGAALEEEEEEASVERAFEGKAVPTWREQLTLRAFVVSFFLAIMFSVIVMKLNLTTGIIPSLNVSAGLLGFFFVRLWTGAIERMGFLRQPFTRQENTVIQTCVVAAYDIAFSGGFGNYLFAMSDTIANQTTEAKDAQNIKNPHVGWMIAFLFLVSFVGLFALVPLRKIMIVDYKLTYPSGTATAYLINGFHTPEGAKLAKKQVKTLGKFFLFSFLWGFFQWFYTGGDSCGFSSFPTLGLQAYKNRFYFDFSPTYVGVGMICPHIVNVSVLLGGILSWGVMWPLISNKRGIWFSADLPDSSLHGLQGYRVFISISLILGDGLYNFLKVLVRTTAAFATMVKKNNMIPVSDEGGAMVT…	4799.47	3197.1	3249.27	5766.89	4253.18	2218.16	3092.09	2989.32	3455.72	2938.82	1926.97	1132.14	755.403	729.451	1135.99	2401.53	1590.06	1653.2	1921.33	1891.53	1554.96	1975.47	2372.67	1996.63	1974.93
Bradi5g16257.1	5.34933e-07	4.68538e-06	0.204903	0.000291545	6.54349e-08	8.65282e-07	6.54349e-08	0.829942	0.212018	0.829942	0.52653	0.212018	0.291038	MAVTVVRDVETGPEASTSGSAEEKPSWFTPKRLLVMFCIINMLNYVDRGVIASNGVNGSRGSCSGGTCTSGSGIQGDFNLNNFEDGVLSSAFMVGLLVASPIFASLAKIHNPFRLIGVGLLVWTIATAGCGCSFDFWSITICRMLVGVGEASFISLAAPFIDDNAPVAQKTAWLAMFYMCIPTGIALGYVYGGLVGKRLHWRAAFWGESILMLPFVILGFVIKPLELKGFTHNKKTKEYGPMLNPELRDETNNNGIKQGVPAGTEGLTEKIPQRFSFSSFGKKVMIEIGHFGQDMKELLQEKVYVINVLGYIAYNFVIGAYSYWGPKAGQDIYKMASADLMFGGITIVCGIFGTLAGGFILDKIESTISNAFKLLSGATFLGAIFCFSAFCFKSLYGFI…	32884.8	43928.3	40130.1	32935.3	37469.6	34176.2	26014.7	32108.7	32090.8	31097.6	16031.1	15111	18066.3	29707.1	19728.9	10543.8	10037.8	7275.57	3919.64	7944.22	11724.8	6199.15	12765.6	12930.7	10905.1
Bradi5g18170.1	4.60801e-05	0.000151985	0.206416	0.295335	0.000827383	0.0048462	0.000827383	1.16054	0.545805	0.818251	1.16054	0.545805	0.632609	MEGKEEDVRLGANKFSERQPIGTAAQGSEDKDYKEPPPAPLFEPGELKSWSFYRAGIAEFMATFLFLYVTILTVMGVNNSPSKCATVGIQGIAWSFGGMIFALVYCTAGISGGHINPAVTFGLFLARKLSLTRAVFYIVMQCLGAICGAGVVKGFQSGLYMSSGGGANAVAAGYTKGDGLGAEIVGTFVLVYTVFSATDAKRNARDSHVPILAPLPIGFAVFLVHLATIPITGTGINPARSLGAAIIYNKSHNWADHWIFWVGPFIGAALAAVYHQVVIRAIPFKTKS	405196	474361	606491	669712	538940	461188	536643	369436	396684	440988	652991	599274	643182	606397	625461	265690	329764	304712	276460	294156	268763	360769	416132	318089	340938
Bradi5g19430.1	0.000269855	0.000670414	0.991537	0.97585	0.00112556	0.00955493	0.00112556	1.03265	0.657827	0.975531	1.03265	0.657827	0.73539	MGNACGGSLRSKYLHSFKHAASQRHDSDYNSSAAAAGADSPKKQQQPSSHPSAAAAKTDGHAAPAPAPPAAMRRGGAGAPADLGSVLGHPTPSLRDLYQLGRKLGQGQFGTTFLCTELATGTEYACKSISKRKLITKEDIDDVRREIQIMHHLSGHNNVVAIKGAYEDQLYVHIVMELCAGGELFDRIIQRGHYSERKAAELTRIIVGVVEACHSLGVMHRDLKPENFLLANKDDDLSLKAIDFGLSVFFKPGQIFTDVVGSPYYVAPEVLCKKYGPEADVWTAGVILYILLSGVPPFWAETQQGIFDAVLKGVIDFDSEPWPVISDSAKDLITRMLNPRPAERLTAHEVLCHPWIRDQGVAPDRPLDTAVLSRIKQFSAMNKLKKMALRVIAESLSEE…	263598	262586	349781	324568	300133	287645	285299	279225	318988	292789	283863	348269	282086	325512	309933	199169	188571	215368	186635	197436	197888	197541	277467	209963	220715
Bradi5g20107.1	9.76347e-05	0.000282737	0.594318	0.241717	0.00128489	0.00010253	0.00010253	0.898321	0.473697	0.898321	0.842129	0.605202	0.473697	MENPHGGSHGETDLLPEATRMLHEIALRNREEGEEPDLPEEQLRSNDQLQQDEMLAMEAIYGGNLYIFDEKSVPRSFQIRVHCEIPDGISISAELVHGIDNDPNSQSFDTFSVDHLAPISLTCLMPPSYPSHHPPYFTIGVQWLDSMKVSSLCHMLDSIWAQQPGQEVIFEWVQWLQSSMLSHLGFDDGIVIWQPGSRMDPVDVRVVGDILSVESVVQQLISYSEEQCHESFLHGLHVCRICFSEYTGVDFIKLPCRHYFCLSCMGTYTRMHVKEGSVLKLVCPDNKCGGVVPPDLLKRLLGNADFERWERLILQKTLDSMSDVVYCPRCQTACLEDEDNAQCSKCLFSFCTRCRDRRHVGGRCITPEEKLLSLQEREKVRHLAKGNTERRVILANEII…	37209.3	35665	28930.6	25992.2	31949.3	33537.2	26351.4	26794.5	28119.8	28700.7	23979.5	24308.6	30228.8	29104.8	26905.4	18373	14336.6	22231.1	22402.3	19335.8	10969.1	14095.6	17745	17727.4	15134.3
Bradi5g21350.1	0.000196044	0.000511535	0.841014	0.000674375	0.000437339	0.0118549	0.000437339	0.91312	0.428374	0.91312	0.464098	0.428374	0.621714	MGLEEAEEKKAVHGHRLSTVVPSSVTEVENYALGDADMAFRLHYLRGAYYYGAVRGVTTKVLKDPMFPWLDAYYPVAGRVRRPDADADAAAAAADRPYVKCNDCGVRIVEAQCDRALEDWLRDDDDAAVDRVRQMCYDKVLGPELFFSPLLYIQITKFKCGGMALGFSWAHLIGDVASATTCFNHWAKILAGENPGDVVVNPKNEPQHRAPPGTPAPRSVKPVGPVEDYWLVPSGADMACYSFHVTEAALEKLQQEEDPTGRPFELISALLWQTVAKIRVTKEVKTVTVVRTDVAARSGNSLANEQKVGYVDATGYSPAKADMSDLAALLADSVVDETAAVAAFPGDVVVYGGANLTFVDMEQVDLYGLELNGRRPAHVEYGMDGVGEEGAVLVQPDAG…	40323.4	44378.9	42574.7	28874.1	39037.8	30484	26685.3	37743.5	47671.9	35646.2	14322.4	15995.7	16554.7	25596.6	18117.3	10628	18640.2	19938.6	17684.3	16722.8	25052.2	21285.2	26391.6	24352.3	24270.3
Bradi5g21630.1	5.8889e-10	3.38445e-08	1.11935e-06	4.69069e-13	6.66134e-16	2.19951e-11	6.66134e-16	0.564657	0.25523	0.564657	0.392429	0.25523	0.360099	MAEQTEKAFLKQPKVFLSTKKADKAKRPGKAGNRFWKSVGLGFKTPREAIEGTYIDKKCPFTGTVAIRGRIIAGTCHSAKMNRTIIVRRDYLHFVKKYQRYEKRHSNIPAHISPCFRIREGDHVIIGQCRPLSKTVRFNVLKVIPAGSTGGKKAFVAA	128226	155185	140498	121041	136238	68005.5	73646.8	82218.4	83839.2	76927.5	54473.2	58991.3	40410.4	59979.1	53463.5	31902.8	40416.4	34980.6	31787.8	34771.9	49766.6	43039.1	50046.1	53383.8	49058.9
Bradi5g21740.1	1.18001e-06	8.82491e-06	2.18134e-07	1.74435e-06	2.57105e-06	7.93618e-07	2.18134e-07	0.344944	0.263979	0.280345	0.324543	0.344944	0.263979	MEAEQTAELSSVEPTNLKSADKSLVHDDDKENIVNGNSNPKVMETHNYEDDGTGSDGFELVDVKENFDSAKMVEKERESGNVSPLTKGSPKEDEATAESAMLNQETKQLEELSKRIEELESEKHKLMMDMTEAENKQALQYSSLQEAQRSLSDKDKELADATQSLSELGSELEISKRRIQEIEAQLDSSADKLHKLEELKDERSLHAAQEAKRAAELDKMLEMAQLSMKDMENQISDLQEEIKGHQDKAIDHQQVEESLSTTISQFKMVQEALELSKSQVADLEQKLASQDTNISKLTEELSLHCSSEESLKEESLKLETELAAVHEALQAKLLTLQEVEMKLEEQAKDKQTSEATLEKQRVQILHLQSGLDELNDEIVTLKGTLVDSNSKLSERDSML…	426828	759165	832663	769053	696927	205474	198729	168916	208401	195380	234795	195608	275666	198662	226183	232028	251912	250854	226808	240401	206977	161564	198401	168953	183974
Bradi5g21870.2	0.00902391	0.0143215	0.15616	0.79726	0.510756	0.0256335	0.0256335	1.17469	0.383409	0.578509	1.17469	0.736659	0.383409	MRRLHGAALLLLLLAAVAQAQQASTTHPGDAAALNAVFAKLGQKAGPSWNISGDLCTGAATDTTDIDNDNSFNPAIKCVCSGGNTSVCRITRIKIYALDAVGPIPEELRNLTSLTNLNFGQNYLTGPLPSFIGELTAMQYMTFGINALSGPVPKELGNLTNLVSLSISSNNFSGPLPSELGNLAKLEQLYIDSAGLSGSLPSSLSKLTKMKTLWASDNDFTGQIPDYIGSWNLTELRFQGNSFEGPLPATLSNLVQLTGLRIGDILNGSSSSLAFLNNMTSLSTLVLRNCRISDKLVSVDFSKFRNLNLLDLSFNNITGQVPQTLLNLNSLNFLFLGNNSLSGSLPSSIGSSLKNLDFSYNQLSGSVPSWARSSQLNLVANNFLADSSVSYLLGGSAFS…	90800.9	50327.5	52299.8	22846.2	54068.6	21030.9	26776.8	26169.6	51139.4	31279.2	63388	46077.7	75263	69325.8	63513.6	46894.8	38818.6	43561.1	30045.9	39830.1	21393.7	19688.5	20808.8	21030.6	20730.4
Bradi5g21937.1	0.00107139	0.00223386	0.990721	0.999999	0.0196526	0.00496957	0.00496957	1.02881	0.669528	1.02881	0.997059	0.727046	0.669528	MASSSSDPEKLMAKADKLTKLSFTRWNADWKTATSLYEQAAIAYRFRKDNEKAKDAFEKLVHIPWDAAKHMESAGALAKELGLWNEVSDFYRRASEFYRECGRSQPASDALAKGASALEDKAPEEAIKLYDEACALLEDDGKEQMAFDLYRSAASLYVKLEKYSDAAGFFLRLGSAADKCNAINSQCKGYLSAIIIYLYAHDFQQAQKCYNDCSEVQAFLNSDQNRCAMKLLSAYEEGDAEEVKRAAQSNVINHLDHVVIRLAKKLPTGDLQAIKKDLAADDDRDSLDENDLT	149728	182449	123174	168110	155865	154856	167337	150843	168384	160355	143385	167794	142983	167464	155407	97936.8	111074	126739	117534	113321	91602.7	76946.3	137140	111735	104356
Bradi5g22077.1	0.0148881	0.0222661	0.0132701	0.169824	0.0129526	0.0140485	0.0129526	0.473624	0.127504	0.127936	0.473624	0.127504	0.137178	MGFKPLEWYCQPVSHGAWSRAVESAFGAYTPCGIDTLVVCISYLALFGVCFYRIWRTTKDYTVQRYKLRSPYYNYLLGFLVVYCIAEPLYRIATGTSIMNLDGQSGLAPFEITSLVIETAAWCCMLIMIFLETKVYITEFRWYIRFVVIYVLVGKAAMFNLVLPVRQYYSSSSIFYLYCSEIICQCLFGILMVVYLPSLDPYPGYTPIRSEVLVDNTDYEPLAGEEQVCPERHANILSRIFFSWITPLMQQGYKRPINDNDIWKLDNWDETETLYSRFQKCWNDELQKPKPWLLRALHSSLGGRFWLGGFFKIGNDASQFVGPIILNLLLESMQKGDPSWNGYIYAFSIFAGVSLGVLAEAQYFQNVMRTGFRLRSTLIAAVFRKSLRLTNDSRKQFAS…	10349.6	8833.39	5586.29	0	6192.32	1192.22	0	689.893	1286.78	792.223	2774.03	1156.11	2509.36	5291.81	2932.83	1911.69	1098.34	31.7425	116.413	789.548	461.297	913.46	1227.01	796.032	849.449
Bradi5g22707.1	0.0180346	0.0263297	0.999849	0.307699	0.0415659	0.0266153	0.0266153	0.98296	0.555379	0.98296	0.755036	0.588807	0.555379	MDTETPPPPPPPPPPELGMVARAVQRLVARNDAAAAEGDHRPFGIINGMAAFEAAGRKGAARIGVGEYLERVHRYAGLEAECYVAAYAYLDMAAHRRPAAAVASRNVHRLLLACLLLASKVLDDFHHNNAFFARVGGVSNAEMNKLELELLTVLDFRVMLSRRLYDLYRDHLHKLDAQTTPADHVKAKQQQQQQQQPEELRSPDADEGDGEVDDDTHDVRHRKKLPNGGVLHDWSELMANGAGKVRAPPVRYSFPG	9523.89	10870.3	16819.6	17449.1	13665.7	8052.9	18340.9	12708.2	14629.4	13432.9	9526.9	12404.3	8396.51	10944.7	10318.1	8642.56	8080.62	7840.41	7622.26	8046.46	6147.08	7627.37	9249.94	7334.22	7589.65
Bradi5g23620.1	3.78456e-07	3.5454e-06	0.999995	9.55764e-05	1.5207e-05	6.04893e-06	6.04893e-06	1.00455	0.236128	1.00455	0.462923	0.347001	0.236128	MDPSRVGELRGFVEACKKDPSLLSDPNLAFFRDYLESLGADLPAAAFSKAPKTSSMDDIDEDDEDDLNMRDPTPEPDELDEEIVESDLELEGDIVESDHDDSPQKMGDPSVEVTEESRDASQEAKGNAMEAMSEGKFDEAVEHLTKAILLNPLSAIMYGTRASVFIKMKKPAAAIRDANAALEINPDSAKGYKTRGMAYAMLGKWEEAARDLHAASNIDYDDEIHAVLKKVEPNAHKIVEHRRKYDRLRKEREEKKAERDRLRRRAEAQAAYDKAKKKEQSSSRSSGGASPRGFPGGMPGGFPAGMGGGFPAGMGGGFPGGAMPGGMGGGFPGGAMPGGMGGGFPGGAMPGAGGGPGNVDMGDILNDPDLMSAFGDPEVMAALQDVMSNPANFAKHQAN…	15239.1	22073	18360.2	20968.2	19160.1	19424	18315.4	18611	20638.8	19247.3	6747.75	11361.1	10270.4	7099.4	8869.66	9749.84	2849.46	7700.43	6294.58	6648.58	3327.31	6607.98	1295.66	6866.04	4524.25
Bradi5g23660.1	3.6645e-07	3.45693e-06	0.535778	0.000297059	7.13118e-06	5.47019e-07	5.47019e-07	0.901711	0.328293	0.901711	0.581188	0.328293	0.358022	MSGQSQRLNVVPTVTMLGVVKARLIGATRGHALLKKKSDALTVQFRAILKKIVATKESMGEAMRASSFSLAEAKYVAGDGVRHVVLQSVRSASLRVRSHQENVAGVKLPKFSHFVDPAGGASGGPSGASPSLTGLARGGQQVSACRTAHVKAIEVLVELASLQTSFLTLDEAIKTTNRRVNALENVVKPRLENTITYIKGELDELEREDFFRLKKIQGYKRREIERQMIEAKKFAEEQLAEDLALKRGISMGAATNILVGGGDKDDDIIF	379837	562320	553456	473181	492199	478057	429449	423106	444671	443821	251244	273969	266892	352135	286060	219051	216766	110723	99801	161585	171535	153181	189438	190717	176218
Bradi5g23940.1	1.13282e-07	1.46408e-06	0.000129068	1.31683e-07	2.02243e-08	2.58935e-09	2.58935e-09	0.576994	0.232475	0.576994	0.373234	0.232475	0.291056	MAGKEGEEEVYVASIDQGTTSTRFIVYDRHARPVASHQLEFKQHYPEAGWVEHDPMEIMESVRACMANALEKAAADGLNVSAGLKAIGITNQRETTVMWSKSTGLPLYNAIVWMDVRTSSICRRLEGELAGGRTHFVETCGLPISTYFSALKLLWLMENVDAVKDAVRAGDALFGTIDTWLIWNLTGGIGGKDGKQIGQHVTDCSNASRTMLMNLKALDWDKPTLKALGIPADILPKIISNSEKIGLVADGFPLAGVPISGCLGDQHAAMLGQLCQKGEAKSTYGTGAFILLNTGEEVTQSSHGLLSTIAYKLGPSAPTNYALEGSIAIAGAAVQWLRDSLGIIRSAAEIEELAESVQDSGGIYFVPAFNGLFAPWWRDDARGICIGITRFTNKGHIAR…	15624.2	15391.7	14619.4	11909.4	14386.2	7126.89	8122.53	7064.88	10888.7	8300.74	5149.04	6752.97	3126.7	6448.95	5369.41	2797.64	4581.3	2274.11	3724.64	3344.42	5210.98	3195.75	3998.86	4343.13	4187.18
Bradi5g24370.1	0.00857964	0.013727	0.0907348	0.00565426	0.0042376	0.0541984	0.0042376	0.666369	0.4508	0.666369	0.469423	0.4508	0.627418	MALEAARSWAASVLPPELAAAAGGDPLVALAATAAALVAGLLVLAVWFRSGGGAPSKPAATPLRPPPVKVDADADADDGRKRVTIFFGTQTGTAEGFAKAMAEEAKVRYEKTVFKVVDLDDYAAEDDEYEEKLKKETLVLFFLATYGDGEPTDNAARFYKWFTEGKEKEVWLKDFKYAVFGLGNRQYEHFNKVAKVVDELLEEQGGKRLVPCGLGDDDQCIEDDFTAWKEQVWPELDQLLRDDDDTTGASTPYTAAIPEYRVVFIDKSDLVVEDKSWTLANGNGVIDIHHPCRSNVAVRKELHKPASDRSCIHLEFDISGTGLVYETGDHVGVYSENSVDTVEQAERLLGLSPDTVFSIHADAEDGSPRKGGSLAPPFPSPCTLRTALLRYADLLNSPK…	27534.7	36243	19623.1	19659.6	25765.1	12869.6	14956	16281.3	24569.3	17169	11424	9745.09	7962.44	19247.4	12094.7	9068.8	10369.7	15272.2	11748.9	11614.9	15920.1	19578.6	15817.1	13346.1	16165.5
Bradi5g24850.2	0.000473336	0.0010915	0.471983	0.109836	0.000512488	0.000787133	0.000512488	0.817941	0.343187	0.817941	0.695336	0.343187	0.352513	MSLEVQDSEVDIVIAALQPNLTSFFEAWQPFFSRFHIIVVKDPDMAADLKIPSGFDVKVYTKSDIEGLLGATSINFSGHSCRYFGYLVSRKKYVISIDDNCLPAKDTAGMTVDAVTQHMINLKTPATPFFFNTLYDPYRKGADFVRGYPFSLREGVECMLSSGLWLHNADYDPMTHVVKRNQRNTNYVDAVMTVPLGAMMPVSGINVAFNREVLGPVMFPGLRIRKEGKHRWDTLEDIWNGLCAKVVCDSLGYGVKTGLPYVMRSDAEAGKALESLKDWEGVKVMDNVLPFFQSLKLSRTAVTVDDCVKELASIVREKLAPKNPIFAKAADAMEEWTKLWKSHGAQNA	5778.59	11802	12698	8487.24	9691.46	6796.92	8492.77	6959	9459.46	7927.04	6805.11	5592.32	6540.73	8017.14	6738.82	4941.01	3176.33	1675.34	3511.25	3325.98	1341.53	4106.04	3986.65	4231.25	3416.37
Bradi5g24960.1	0.000181102	0.000476231	0.157704	0.00078302	0.00026713	0.00053807	0.00026713	0.810694	0.5169	0.810694	0.55063	0.5169	0.524233	MDVVKAAQLSGRTLERVVVHPLVLLSIVDHYNRVARDTRKRVVGVLLGTSSRGTVDVTNSYAVPFEEDDKDPRIWFLDHNYHESMFSMFKRINAKEHVVGWYSTGPKLKENDLDVHALFNNYVPNPVLVIIDVQPKELGIPTKAYYAVEEVKENATQKSQKVFVHVPSEIAAHEVEEIGVEHLLRDVKDTTISTLATEVSSKLAALKGLDARLREIRGYLDLVIEGKLPLNHEILYHLQDVFNLLPNLNVNELIKAFAVKTNDMMLVIYLSSLIRSVIALHNLINNKMLNKEHEKAEDSKPAAIPTAAGS	8472.51	12199.2	14391.3	9617.97	11170.3	7353.43	9887.41	9825.02	9156.78	9055.66	6299.76	6370.09	6008.7	5924.18	6150.68	5525.22	6802.83	4637.91	6129.66	5773.91	5530.61	5576.15	5123.9	7192.61	5855.82
Bradi5g26140.1	4.02281e-06	2.19523e-05	0.00102926	0.881103	5.25128e-05	5.08676e-05	5.08676e-05	0.945552	0.431917	0.642867	0.945552	0.431917	0.535154	MANIDMAAVLADLERDAAADARVPRTKLVCTLGPASRSVPMLEKLLRAGMNVARFNFSHGTHEYHQETLDNLRQAMHNTGVLCAVMLDTKGPEIRTGFLKDGKPIKLTKGQEVTVSTDYDIKGDSTMISMSYKKLPVDVKPGHVILCADGTISLTVLSCDPEAGTVRCRCENTAMLGERKNCNLPGIVVDLPTLTEKDKEDILGWGVPNDIDMIALSFVRKGSDLVTVRKLLGQHAKRIMLMSKVENQEGIVNFDEILRETDAFMVARGDLGMEIPVEKIFLAQKMMIYKCNLAGKPVVTATQMLESMIKSPRPTRAEATDVANAVLDGTDCVMLSGESAAGAYPEVAVKIMARICVEAESSLDNDAVFKEMIRSAPLPMSPLESLASSAVRTANKARA…	51584.3	66892.9	74312.7	51800.6	61147.6	36923.1	44260.4	30432.5	45623.1	39309.8	59215.6	56710.3	53139.2	62208	57818.3	28185.7	29159.5	27496	20801.5	26410.7	28873.4	34245.5	32602.4	35172.4	32723.4
Bradi5g27030.1	7.47875e-06	3.41994e-05	0.0112295	4.26029e-05	1.11538e-05	6.4724e-06	6.4724e-06	0.813673	0.598669	0.813673	0.663254	0.622157	0.598669	MSEEDSTSAAQEPRRPTPKLNERILSSLSRRSVAAHPWHDLEIGPGAPAVFNVVVEITKGSKVKYELDKKTGLIKVDRILYSSVVYPHNYGFVPRTLCEDNDPMDVLVLMQEPVVPGSFLRARAIGLMPMIDQGEKDDKIIAVCADDPEYRHYNDISELSPHRLQEIKRFFEDYKKNENKEVAVDAFLPATDAREAIQHSMDLYAQYILQSLRQ	26257.5	29367.5	33138.9	26068.6	28708.1	22932.2	22412	21842.6	26249.3	23359	21328.1	19406.4	18107.9	17320.8	19040.8	18757.2	16979.5	17394.1	18313	17861	19237.9	15827.8	18842.6	14838.3	17186.7
